# Supplementary material for: Risk of COVID-19-related bullying, harassment and stigma among healthcare workers: an analytical cross-sectional global study
Source: PubMed Central journal article supplement — BMJ Open. 2020 Dec 30;10(12):e046620. doi: 10.1136/bmjopen-2020-046620 (PMC7780430; doi:10.1136/bmjopen-2020-046620), 2020-12-30
Supplement: bmjopen-2020-046620.draft_revisions.pdf [file bmjopen-2020-046620.draft_revisions.pdf]

# BMJ Open

BMJ Open is committed to open peer review. As part of this commitment we make the peer review history of every article we publish publicly available.

When an article is published we post the peer reviewers' comments and the authors' responses online. We also post the versions of the paper that were used during peer review. These are the versions that the peer review comments apply to.

The versions of the paper that follow are the versions that were submitted during the peer review process. They are not the versions of record or the final published versions. They should not be cited or distributed as the published version of this manuscript.

BMJ Open is an open access journal and the full, final, typeset and author-corrected version of record of the manuscript is available on our site with no access controls, subscription charges or pay-per-view fees (<http://bmjopen.bmj.com>).

If you have any questions on BMJ Open's open peer review process please email [info.bmjopen@bmj.com](mailto:info.bmjopen@bmj.com)

# BMJ Open

## Risk of COVID-19-related bullying, harassment, and stigma in health care workers: A Global Study

|                               |                                                                                                                                                                                                                                                                                                                                                                                                                                                                                                                                                                                                                                                                                                                       |
|-------------------------------|-----------------------------------------------------------------------------------------------------------------------------------------------------------------------------------------------------------------------------------------------------------------------------------------------------------------------------------------------------------------------------------------------------------------------------------------------------------------------------------------------------------------------------------------------------------------------------------------------------------------------------------------------------------------------------------------------------------------------|
| Journal:                      | <i>BMJ Open</i>                                                                                                                                                                                                                                                                                                                                                                                                                                                                                                                                                                                                                                                                                                       |
| Manuscript ID                 | bmjopen-2020-046620                                                                                                                                                                                                                                                                                                                                                                                                                                                                                                                                                                                                                                                                                                   |
| Article Type:                 | Original research                                                                                                                                                                                                                                                                                                                                                                                                                                                                                                                                                                                                                                                                                                     |
| Date Submitted by the Author: | 04-Nov-2020                                                                                                                                                                                                                                                                                                                                                                                                                                                                                                                                                                                                                                                                                                           |
| Complete List of Authors:     | Dye, Timothy ; University of Rochester Medical Center, Obstetrics and Gynecology; University of Rochester Medical Center, University of Rochester School of Medicine and Dentistry<br>Alcantara, Lisette; University of Rochester Medical Center, Obstetrics and Gynecology<br>Siddiqi, Shazia; University of Rochester Medical Center, Obstetrics and Gynecology<br>Barbosu, Monica; University of Rochester Medical Center, Obstetrics and Gynecology<br>Sharma, Saloni; University of Rochester Medical Center, Obstetrics and Gynecology<br>Panko, Tiffany; University of Rochester Medical Center, Obstetrics and Gynecology<br>Pressman, Eva; University of Rochester Medical Center, Obstetrics and Gynecology |
| Keywords:                     | COVID-19, PUBLIC HEALTH, Public health < INFECTIOUS DISEASES, EPIDEMIOLOGY                                                                                                                                                                                                                                                                                                                                                                                                                                                                                                                                                                                                                                            |
|                               |                                                                                                                                                                                                                                                                                                                                                                                                                                                                                                                                                                                                                                                                                                                       |

SCHOLARONE™  
Manuscripts

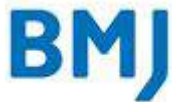

I, the Submitting Author has the right to grant and does grant on behalf of all authors of the Work (as defined in the below author licence), an exclusive licence and/or a non-exclusive licence for contributions from authors who are: i) UK Crown employees; ii) where BMJ has agreed a CC-BY licence shall apply, and/or iii) in accordance with the terms applicable for US Federal Government officers or employees acting as part of their official duties; on a worldwide, perpetual, irrevocable, royalty-free basis to BMJ Publishing Group Ltd ("BMJ") its licensees and where the relevant Journal is co-owned by BMJ to the co-owners of the Journal, to publish the Work in this journal and any other BMJ products and to exploit all rights, as set out in our [licence](#).

The Submitting Author accepts and understands that any supply made under these terms is made by BMJ to the Submitting Author unless you are acting as an employee on behalf of your employer or a postgraduate student of an affiliated institution which is paying any applicable article publishing charge ("APC") for Open Access articles. Where the Submitting Author wishes to make the Work available on an Open Access basis (and intends to pay the relevant APC), the terms of reuse of such Open Access shall be governed by a Creative Commons licence – details of these licences and which [Creative Commons](#) licence will apply to this Work are set out in our licence referred to above.

Other than as permitted in any relevant BMJ Author's Self Archiving Policies, I confirm this Work has not been accepted for publication elsewhere, is not being considered for publication elsewhere and does not duplicate material already published. I confirm all authors consent to publication of this Work and authorise the granting of this licence.

1  
2  
3 **Risk of COVID-19-related bullying, harassment, and stigma in health care workers:**  
4 **A Global Study**  
5

6 Timothy Dye, PhD (tim\_dye@urmc.rochester.edu)  
7 Lisette Alcantara, MD (Lisette\_Alcantara@URMC.Rochester.edu)  
8 Shazia Siddiqi, MD (Shazia\_Siddiqi@URMC.Rochester.edu)  
9 Monica Barbosu, MD (Monica\_Barbosu@URMC.Rochester.edu)  
10 Saloni Sharma, MBBS (saloni.sharma@chet.rochester.edu)  
11 Tiffany L. Panko, MD (Tiffany\_Panko@urmc.rochester.edu)  
12 Eva Pressman, MD (Eva\_Pressman@URMC.Rochester.edu)  
13  
14

15  
16 University of Rochester  
17 School of Medicine and Dentistry  
18 Department of Obstetrics and Gynecology  
19 Rochester, New York USA  
20  
21  
22  
23  
24  
25  
26  
27  
28  
29  
30  
31  
32  
33  
34

35 Corresponding author:  
36 Timothy De Ver Dye, PhD  
37 University of Rochester School of Medicine and Dentistry  
38 601 Elmwood Avenue  
39 Rochester, New York USA 14642  
40 585.276.6953  
41 tim\_dye@urmc.rochester.edu  
42  
43

44 Keywords: COVID-19, Stigma, Healthcare Providers, Workforce, Global, Mixed Methods,  
45 Qualitative, Quantitative, Bullying  
46  
47

48 Word count: 6935  
49  
50  
51  
52  
53  
54  
55  
56  
57  
58  
59  
60

## ABSTRACT

**Objectives:** Essential health care workers (HCW) uniquely serve as COVID-19 healers and, potentially, as carriers of SARS-CoV-2. We assessed COVID-19-related stigma and bullying against HCW controlling for social, psychological, medical, and community variables.

**Design:** We nested an analytical cross-sectional study of COVID-19-related stigma and bullying among HCW within a larger mixed-methods effort assessing COVID-19-related lived experience and impact. Adjusted Odds Ratios (aOR) and 95% confidence intervals evaluated the association between working in health care settings and experience of COVID-19-related bullying and stigma, controlling for confounders. Thematic qualitative analysis provided insight into lived experience of COVID-19-related bullying.

**Setting:** We recruited potential participants in four languages (English, Spanish, French, Italian) through Amazon Mechanical Turk's online workforce and Facebook.

**Participants:** Our sample included 7,411 people from 173 countries who were age 18 or over.

**Findings:** HCW significantly experienced more COVID-19-related bullying after controlling for the confounding effects of job-related, personal, geographic, and sociocultural variables (aOR: 1.5; 95%CI: 1.2, 2.0). HCW more frequently believed that people gossip about others with COVID-19 (OR: 2.2; 95%CI: 1.9, 2.6) and that people with COVID-19 lose respect in the community (OR: 2.3; 95%CI: 2.0, 2.7), both which elevate bullying risk (OR: 2.7; 95% CI: 2.3, 3.2, and OR: 3.5; 95% CI: 2.9, 4.2, respectively). The lived experience of COVID-19-related bullying relates frequently to public identities as HCW traverse through the community, intersecting with other domains (e.g., police, racism, violence).

**Interpretation:** After controlling for a range of confounding factors, HCW are significantly more likely to experience COVID-19-related stigma and bullying, often in the intersectional context of racism, violence, and police involvement in community settings.

## Funding

This work was funded by The Richard W. & Mae Stone Goode Foundation, Award # 057843-002. Drs. Sharma and Alcantara are trainees in the University of Rochester's Translational Biomedical Science PhD Program, which is supported by Grant 2TL1TR002000-05 from the National Center for Advancing Translational Sciences, National Institutes of Health. Dr. Alcantara is additionally supported by funds from BWF1014095 from the Burroughs Wellcome Fund. Drs. Siddiqi and Panko are supported by the National Institute of General Medical Sciences of the National Institute of Health under Award Number K12GM106997. We also accessed the recruitment and REDCap resources of the University of Rochester CTSA, award number UL1 TR002001 from the National Center for Advancing Translational Sciences of the National Institutes of Health. The funders had no role in the study design, data collection and analysis, decision to publish, or preparation of this manuscript.

## Article Summary: Strengths and limitations of this study

We conducted a mixed method global assessment of COVID-19-related stigma and bullying with research participants from 173 countries. We specifically evaluated such stigma and bullying against healthcare workers.

Research participants accessed the study through a recruitment link distributed through Amazon's mTURK and Facebook. People without access to the internet or to these tools were unable to participate in this study.

COVID-19-related stigma and bullying were assessed with three questions developed and tested for this study rather than using more lengthy, multi-item scales that could provide more nuanced information about these topics.

## INTRODUCTION

Stigma in the context of health care represents a major barrier to sustain access to care while assuring equity and quality of services. Individual or collective beliefs and behaviors around a specific diagnosis resulting in any type of social discrimination and moral discredit prevent people from seeking care in a timely manner or even at all. Consequently, stigma has a negative impact on health outcomes aggravated by the mental health implications and social isolation that challenge public health initiatives targeting solutions for health concerns.(1)

Worldwide, health care workers also suffer the negative actions that are the result of stigmatization, such as harassment and violent attacks inside and outside of their workplace compounded by the long working hours, psychological distress, fatigue, and occupational burnout that often is intrinsic to their jobs. Stigma and harassment resulting in bullying and violence against health care workers could constitute a human rights violation,(2) with clear impacts on the workers themselves, their social and work environments, and patients.(3) On August 18, 2020, the head of the Health Care in Danger initiative of the International Committee of the Red Cross (ICRC) Maciej Polkowski stated in an interview for The Lancet that more than 600 incidents of violence, harassment, or stigmatization have been reported against health care workers, patients, and medical infrastructure in relation to the COVID-19 pandemic; of these recorded incidents of violence and harassment, 67% of those events were directed at health care workers.(4) Some of these incidents include verbal and physical assault, such as patients who have deliberately coughed or spat on health care workers. These acts of violence have been shown to increase the levels of stress and, consequently, to exacerbate psychological sequelae resulting from moral injuries. People who have suffered discrimination and stigma are at elevated risk for mental illness, including anxiety, depression, PTSD, and suicidality.(5)

The global health emergency as a result of the COVID-19 pandemic has triggered a social crisis marked by discriminatory behaviors and stigma against people perceived as suspect, diagnosed, or have survived the virus. Ironically, despite their role in caring for people with COVID-19, health care workers are no exception to experiencing stigma.(6) During outbreaks of infectious diseases, frontline personnel are often stigmatized by people in their communities due to fear that they are sources of infection.(7) Studies report that while often

1  
2 risking their own lives in exposing themselves to infection while delivering care, health care  
3 workers also experience stigma such as the denial of services, housing, verbal abuse or  
4 gossip, and social devaluation. Moreover, their family members face 'secondary' or  
5 'associative' stigma.(8)  
6  
7  
8  
9

10 During the COVID-19 pandemic, fear, panic, misinformation about how SARS-CoV-2 (the  
11 virus that causes COVID-19) can spread, and misplaced anger are been described as some  
12 of the reasons people attack and abuse health care personnel.(9) In the same context, in  
13 Mexico the rapid increase of COVID-19 cases have led to a series of violence incidents  
14 against health care workers accused of spreading the virus. Reports describe health care  
15 workers being threatened, beaten, sprayed with bleach, and even evicted from their  
16 homes.(10)  
17  
18  
19  
20  
21  
22  
23

24 While it is clear that health care workers experience bullying and stigma relating to COVID-19  
25 around the world, little is known about how this risk in health care workers differs from others  
26 in the community, especially controlling for other factors that may also be potentially  
27 stigmatizing or lead to bullying incidents. We sought to examine bullying against health care  
28 workers quantitatively to better identify the interaction of health care workers and bullying in  
29 the context of other factors, but also qualitatively to help examine the lived experience of  
30 bullying among health care workers around the world.  
31  
32  
33  
34  
35  
36  
37

## 38 **MATERIALS AND METHODS**

### 39 **Study Design**

40  
41  
42 We nested an analytical cross-sectional study within a larger mixed-methods effort assessing  
43 COVID-19-related lived experience and impact around the world.(11) To evaluate the  
44 associations of interest, we *a priori* included assessment of lived experience relating to  
45 COVID-19-related bullying, harassment, hurt, and stigma, and also included assessment of  
46 whether or not the respondent or someone in their household worked in a health care setting.  
47 The cross-sectional design suited our needs for rapid deployment and large-scale distribution  
48 around the world, reaching potential research participants through several social media  
49 platforms.  
50  
51  
52  
53  
54  
55  
56  
57  
58  
59  
60



1  
2 The parent study was guided by the Critical Medical Ecological model,(12) accounting for the  
3 sociocultural, biological, health care, abiotic data, and power dynamics across the domains of  
4 individuals, households, and communities in six world regions (Africa, Asia, Europe, Latin  
5 America and the Caribbean, Northern America, and Oceania).  
6  
7  
8  
9

10 We used the STROBE cross sectional checklist when writing this report(13) along with the  
11 Consolidated Criteria for Reporting Qualitative Research (COREQ)(14) guidelines.  
12  
13  
14

## 15 **Setting**

16 We implemented this study online and globally through the University of Rochester's  
17 installation of REDCap (v. 9.9.2, Vanderbilt University) in English, Spanish, French, and  
18 Italian, which reflected the primary languages found in the parts of the world where the most  
19 COVID-19 cases were emerging during the period of this study (April 6, 2020 to May 29,  
20 2020).(15)  
21  
22  
23  
24  
25  
26  
27

## 28 **Sample Size**

29 The *a priori* sample size for the parent study recruited participants from six geographic  
30 regions(16) (Africa, Asia, Europe, Northern America, Latin America and the Caribbean, and  
31 Oceania) based on the International Standard Organization (ISO) 3166 Country Codes(17) of  
32 participant residence. This estimation yielded 380 participants required per region, which we  
33 inflated by 50% (to 570), to account for multivariate analysis, missing data, and sub-analyses.  
34  
35 For this particular nested analysis, we conducted a *post hoc* power computation and  
36 estimated that with a 99% two-sided confidence interval that our sample size exceeded 80%  
37 power to detect an effect size of at least 1.5 with normal approximation and continuity  
38 correction (JMP Pro 15.0.0 (SAS Institute Inc., Cary, NC)).  
39  
40  
41  
42  
43  
44  
45  
46

## 47 **Respondents**

48 Participants were recruited through two social media platforms: 1) the Amazon Mechanical  
49 Turk ("mTURK") online workforce(18) and 2) through Facebook, Instagram, and the  
50 Facebook Audience Network.(19) Facebook's platforms are widely accessible globally and  
51 frequently are used survey research.(19) mTURK enables access to a multilingual digital  
52 workforce, providing the ability to recruit global research participants, including those without  
53 Facebook platform access.(18) Inclusion criteria included self-identification as age 18 and  
54  
55  
56  
57  
58  
59  
60

1  
2 older and able to complete the survey in English, Spanish, French, or Italian. Participants  
3 recruited through mTURK and Facebook were routed to the REDCap survey in the language  
4 of recruitment (English, Spanish, French, Italian), were presented with the RSRB-approved  
5 Information Sheet in that language, provided consent to continue, and were asked to confirm  
6 their age and country of residence. To accommodate their role as a digital workforce to reach  
7 harder-to-access populations, mTURK respondents were paid between \$1.00 to \$3.00 for  
8 participation.(20, 21) Facebook or Instagram respondents were not compensated. Additional  
9 recruitment details are available elsewhere.(22) In total, 7,411 individuals (40% recruited  
10 through mTURK, and 60% recruited from Facebook) represented 173 countries that were  
11 included in the final sample.  
12  
13  
14  
15  
16  
17  
18  
19  
20

## 21 **Measures**

22 This nested study included questions around COVID-19-specific actions, perceptions, and  
23 experiences mostly derived from the Kaiser Family Foundation (KFF)'s Coronavirus Poll,(23)  
24 or that were constructed and tested by the project team for flow and understandability.  
25  
26

27 Personal experience with COVID-19 included testing, perception of infection, adherence to  
28 prevention strategies and recommendations (masking, social-physical distancing, working  
29 from home), and COVID-19-related morbidity or mortality in friends, family, or neighbors.  
30  
31

32 Socio-demographic measures included age, gender, education, ownership of material assets  
33 (car and home), country of residence (mapped to region), and social media use. Household-  
34 related responsibilities included care for elderly and care for children, and health variables  
35 included the presence of a chronic health condition in the participant or in a household  
36 member.  
37  
38  
39  
40  
41  
42

43 The primary exposure of interest was whether or not the participant worked in a health care  
44 setting, the focus of this analysis. We assessed this by asking the KFF Coronavirus Poll(23)  
45 question: *Do you or anyone in your household work in a health care delivery setting, such as*  
46 *a doctor's office, clinic, hospital, nursing home, or dentist's office?*  
47  
48  
49  
50  
51

## 52 **Outcome: COVID-19-related Harassment, Bullying, and Stigma**

53 The primary outcome for this nested analysis was COVID-19-related harassment and  
54 bullying. To assess this phenomenon, we created and tested the following question: *Have*  
55 *you or a family member been harassed, bullied, or hurt because of coronavirus?* Response  
56  
57  
58  
59  
60

options to this question were “yes,” “no,” and “don’t know.” To identify specifically those who had perceived they or a family member were harassed, bullied, or hurt, we consolidated “no” and “don’t know” into one category, and “yes” into another. If the participant indicated that they or a family member had been harassed, bullied, or hurt because of coronavirus they were subsequently asked to explain their response (open-ended).

Of secondary interest in our analysis is the ascertainment of participant perception of coronavirus stigma. We adapted two stigma questions from STRIVE(24) for this purpose: *Do people talk badly or gossip about other people who are living with, have had, or are thought to have coronavirus infection (or COVID-19)?* and *Do people who have had coronavirus infection (or COVID-19) lose respect or status in the community?* Participant responses to both questions were “Definitely Yes,” “Probably Yes,” “Probably Not,” “Definitely Not,” and “Don’t Know.” In analysis, these questions were reduced to two categories: “Definitely” or “Probably Yes” in one category, and the other options in another.

**Statistical Analysis.** All variables included in this study were cross-tabulated with the predictor variable of interest (Health care worker) and the primary outcome (COVID-19-related harassment or bullying). Numbers and percentages are used to display distribution and Pearson’s chi-square analyses and their associated p-values are used to compute and display significance.

Logistic regression was used to compute Odds Ratios (OR) for COVID-19-related harassment or bullying by health care worker status, with the OR point estimate and 95% confidence interval (95% CI) conveying magnitude and certainty of the association. Following Hosmer and Lameshow’s approach,(25) variables marginally (or more) associated with both the predictor and outcome variables ( $p < 0.10$ ) were included in a multivariate logistic regression to assess potential confounding. Additionally, to address collinearity, only variables with a Variance Inflation Factor (VIF) value  $< .05$  were retained in the model. Variables not displaying linearity with the predictor and outcome variables were excluded from the multivariate analysis. The Hosmer and Lameshow Goodness-of-Fit statistic was used to assess the degree to which the data fit the final model. We used a forward stepwise conditional approach for assessing and including variables in the multivariate model, aiming to achieve a parsimonious, explanatory model. IBM SPSS Statistics (v25) was used for

1  
2 analysis. The significance level of all tests was set at 5%. Records missing data were  
3 excluded from the multivariate analysis.  
4  
5

6  
7 **Qualitative Coding and Analysis.** In total, 327 participant-level open-ended responses  
8 explaining COVID-19-related harassment and bullying situations and perspectives were  
9 coded by a team of coders. Responses were translated into English and coding was  
10 conducted in English. A review of qualitative responses generated an eleven-item codebook.  
11 Coders applied codes to all qualitative responses, discussing and resolving differences in  
12 code application. Descriptive analysis of qualitative codes is presented to denote magnitude  
13 of response to identify themes, and direct quotations from health care workers are presented  
14 to illustrate examples of those themes. Participant quotes are edited only occasionally when  
15 there are clear spelling, punctuation, or usage errors that impede understanding. Any  
16 potentially identifying or stigmatizing details, including country, are deleted or masked.  
17  
18  
19  
20  
21  
22  
23  
24  
25

26 **Ethical Review.** This study was performed in accordance with the ethical standards  
27 established by the 1964 Declaration of Helsinki and its later amendments. The University of  
28 Rochester's Research Subjects Review Board determined that this study met federal and  
29 University criteria for exemption. All participants provided informed consent to engage in this  
30 research after a review of a detailed Information Sheet presented in English, French,  
31 Spanish, or Italian at the beginning of the REDCap survey. Participants could skip any  
32 question in the survey except age and country of residence. All staff associated with this  
33 study completed CITIProgram's Research, Ethics, and Compliance Training.  
34  
35  
36  
37  
38  
39  
40

## 41 **RESULTS**

42  
43 In total, 595 participants in this study (8.0% of the total sample size) indicated they or a family  
44 member experienced COVID-19-related harassment, bullying, or hurt, and 837 participants  
45 (11.3% of the total sample size) indicated they worked in a health care delivery setting, such  
46 as a doctor's office, clinic, hospital, nursing home, or dentist's office.  
47  
48  
49  
50

51  
52 Overall, shown in Table 1, people who worked in health care settings were significantly more  
53 likely to believe they have – or have had – coronavirus infection, or COVID-19 (OR: 2.7; 95%  
54 CI: 2.2, 3.3) than their counterparts who did not work in a health care setting. In fact, people  
55 who work in health care settings are also significantly more likely than others to have actually  
56  
57  
58  
59

1  
2 tested positive for COVID-19 (OR: 2.2; 95%CI: 1.4, 3.4). Participants receiving positive  
3 COVID-19 test results were significantly more likely to experience COVID-19-related bullying  
4 (OR: 4.8; 95% CI: 3.0, 7.7), as were participants generally who believed they had had  
5 COVID-19 previously (OR: 5.4; 95% CI: 4.4, 6.6).  
6  
7  
8  
9

10 Health care workers were less likely to follow social-physical distancing compared with  
11 participants who were not health care workers (OR: 0.7; 95% CI: 0.6, 0.9), and were less  
12 likely to be able to do their jobs from home (OR: 0.4; 95% CI: 0.4, 0.5). Both of these factors  
13 were related similarly to COVID-19-related bullying: people less likely to follow social-physical  
14 distancing closely (OR: 1.8; 95% CI: 1.4, 2.3) and those who could not do their jobs from  
15 home (OR: 1.3; 95% CI: 1.1, 1.5) were more likely to experience bullying than were other  
16 participants.  
17  
18  
19  
20  
21  
22  
23

24 While there were no significant differences between age and gender distribution between  
25 health care workers and other workers, health care workers were more likely to have  
26 education beyond high school (OR:1.9; 95%: 1.4, 2.4). Education level (years of education  
27 completed) was not associated with COVID-19-related harassment and bullying in either  
28 health care workers or non-health care workers ( $p=0.103$ ,  $p=0.312$ , respectively; data not  
29 shown). Age was not related to experiencing COVID-19-related harassment or bullying.  
30 Participants identifying as a gender other than male or female were more likely to experience  
31 COVID-19 bullying (OR: 5.7; 95% CI: 5.7; 95% CI: 2.9, 11.6).  
32  
33  
34  
35  
36  
37  
38  
39

40 Health care workers were more likely to procure and wear a mask than non-health care  
41 workers (OR: 1.3; 95%: 1.1, 1.5); mask-wearers were protected, however, from COVID-19-  
42 related harassment and bullying (OR: 0.7; 95% CI: 0.6, 0.8). Health care workers were  
43 significantly more likely to know a family member, friend, or neighbor who has had COVID-19  
44 (OR: 2.8; 95% CI: 2.4, 3.2) and to know someone who has died from COVID-19 (OR:4.0;  
45 95% CI: 3.4, 4.8). Having a family member, friend, or neighbor die from COVID-19 was also a  
46 risk factor for COVID-19-related harassment and bullying (OR: 4.1; 95% CI: 3.3, 5.0), as was  
47 knowing someone who had had COVID-19 (OR: 2.5; 95% CI: 2.1, 3.0).  
48  
49  
50  
51  
52  
53  
54  
55  
56  
57  
58  
59  
60

1  
2 Health care workers were more likely to use social media daily than other workers (OR: 1.3;  
3 95% CI: 1.1, 1.5). However, people who used social media daily were significantly less likely  
4 to experience COVID-19-related bullying (OR: 0.6; 95% CI: 0.5, 0.7).  
5  
6  
7

8  
9 Asia (16.0%), Africa (13.6%), Northern America (12.1%), and Latin America and the  
10 Caribbean (11.4%) had the highest proportions of health care workers that participated in our  
11 study, while Europe (6.2%) and Oceania (6.9%) had the lowest. East Africa (16.7%), South  
12 Asia (17.0%), and the Caribbean (14.7%) were subregions with the highest proportion of  
13 health care workers. Participants in Africa, Asia, Northern America, and Oceania as a cluster  
14 of higher-prevalence regions were significantly more likely to experience COVID-19-related  
15 bullying than were Latin America and Europe as a cluster of lower-prevalence regions (OR:  
16 1.9; 95% CI: 1.6, 2.3). Sub-Saharan Africa (14.0%), Southern Asia (10.7%), and Northern  
17 America (10.6%) had the highest rates of participant experiences of COVID-19-related  
18 bullying.  
19  
20  
21  
22  
23  
24  
25  
26  
27

28 Health care workers were significantly more likely to have a chronic illness than were non-  
29 health care workers (OR: 2.0; 95% CI: 1.7, 2.4), and also are more likely to have someone in  
30 their household with a chronic disease (OR: 1.5; 95% CI: 1.3, 1.8). Those with chronic  
31 illnesses themselves (OR: 1.9 ; 95% CI: 1.6, 2.3) were more likely to experience COVID-19-  
32 related bullying.  
33  
34  
35  
36  
37

38 Health care workers were more likely to have child care responsibilities (OR: 1.8; 95% CI:  
39 1.6, 2.1) and elder care responsibilities (OR: 2.6; 95% CI: 2.2, 3.0) than were non-health care  
40 workers. Both groups – those with child care responsibilities and those with elder care  
41 responsibilities – were at greater risk for COVID-19-related bullying (OR: 1.9; 95% CI: 1.6,  
42 2.2 and OR: 2.2; 95% CI: 1.9, 2.7, respectively).  
43  
44  
45  
46  
47

48 Health care workers were more likely to have access to material assets, being more likely to  
49 own both a car (OR: 1.5; 95% CI: 1.3, 1.8) and a home (OR: 1.4; 95% CI: 1.2, 1.6) than were  
50 non-health care workers. Neither car ownership nor home ownership, however, was related  
51 to COVID-19-related bullying.  
52  
53  
54  
55

## 56 57 Stigma

58  
59  
60

1  
2 Overall, 27.3% of participants believed that people talk badly or gossip about other people  
3 who are living with, have had, or are thought to have COVID-19, and 21.9% of participants  
4 believed people who have had COVID-19 lose respect or status in the community.  
5

6 Perceptions of COVID-19 stigma varied considerably around the world: participants from Asia  
7 (39.2%), Africa (37.8%), and Latin America and the Caribbean (33.6%) were more likely to  
8 believe that people talk badly or gossip about other people who are living with, have had, or  
9 are thought to have COVID-19 than did participants in Europe (21.7%), Northern America  
10 (16.5%), and Oceania (16.0%). Similarly, participants from Asia (34.1%), Africa (29.6%), and  
11 Latin America and the Caribbean (29.0%) were more likely to note that people who have had  
12 COVID-19 lose respect or status in the community than did participants in Europe (11.9%),  
13 Northern America (14.8%), and Oceania (11.9%).  
14  
15  
16  
17  
18  
19  
20  
21

22 Health care workers were more likely to believe that people talk badly or gossip about other  
23 people who are living with, have had, or are thought to have COVID-19 (OR: 2.2; 95% CI:  
24 1.9, 2.6) and that people who have had COVID-19 lose respect or status in the community  
25 (OR: 2.3; 95% CI: 2.0, 2.7). People who hold such beliefs are more likely to have  
26 experienced COVID-19-related harassment or bullying: those believing that people with  
27 COVID-19 are talked badly or gossiped about were significantly more likely to have  
28 experienced COVID-19-related bullying (OR: 2.7; 95% CI: 2.3, 3.2), as do people who feel  
29 others with COVID-19 lost respect or status in the community (OR: 3.5; 95% CI: 2.9, 4.2).  
30 People who believe they have had COVID-19 infection themselves, know someone who's  
31 had COVID-19, or knows someone who's died from COVID-19 are all significantly more likely  
32 to believe people are talked badly about or gossiped or that they lose status and respect in  
33 the community (data not shown).  
34  
35  
36  
37  
38  
39  
40  
41  
42  
43  
44

#### 45 Multivariate Model

46 Shown in Table 2, people who work in health care settings are significantly more likely to  
47 experience COVID-19-related harassment, bullying, or hurt (OR: 2.9; 95% CI: 2.3, 3.5), even  
48 after controlling for the confounding effects of not being able to work from home, having had  
49 COVID-19 themselves, not having closely followed social-physical distancing, having a family  
50 member, friend, or neighbor with or die from COVID-19, having at least one chronic disease,  
51 having child and elder care responsibilities, and residing in Africa/ Asia/ Northern America/  
52 Oceania (aOR: 1.5; 95% CI: 1.2, 2.0). Finally, the lack of significance in the Hosmer and  
53  
54  
55  
56  
57  
58  
59

1  
2 Lameshow Goodness-of-Fit statistic indicates the data fits the model well ( $p=0.990$ ; data not  
3 shown).  
4  
5

## 6 7 Qualitative

8  
9 The code most commonly applied to qualitative excerpts describing harassing/ bullying/  
10 hurtful experiences related to COVID-19 was “Happened in/ related to community,” noted by  
11 109 participants (Table 3). This broad code encompasses a range of types of experiences.  
12 For instance, some community-related bullying commonly applies to people who are  
13 suspected of having COVID-19, perhaps through experiencing one of COVID-19’s symptoms:  
14  
15

16  
17  
18 *One relative had fever and villagers thought it was for coronavirus. They wanted to*  
19 *lock the house and hand over [her] to police. Later on the matter was solved. People*  
20 *are being harsh to a suspected COVID-19 patient. (Participant from South Asia)*  
21  
22

23 *I have COPD and allergies. People would get very mean if I coughed or sniffled. That*  
24 *is one of the major reasons I'm home. (Male participant, 60s, from North America)*  
25

26 *Coughed while using public transportation. Was almost put out...* (Female participant,  
27 40s, from the Caribbean)  
28  
29

30 *Si estornudas aunque tengas la mascarilla y te tapes con el antebrazo la gente te*  
31 *habla y te mira mal. (If you sneeze even if you have the mask and cover yourself with*  
32 *your forearm, people talk to you and look at you badly.) (Female participant in her 20s,*  
33 *from the Caribbean)*  
34  
35

36 *My grandchild was outside with his father walking around the building, just to get a*  
37 *fresh air, no one was around. the [ ] premises have a locked fence usually. and some*  
38 *"good neighbours called the police and they came, didn't get fined though, but got*  
39 *warning. It is so much for solidarity...* (Southwestern Europe, Female participant, 60s)  
40  
41

42 Often, community-related COVID-19-related bullying/ experiences relate to an individual’s  
43 perception of support (or lack thereof) regarding adherence to (or not) of prevention  
44 strategies:  
45  
46

47  
48 *Too many science illiterate people criticizing and mocking scientists because they do*  
49 *not understand the job that we do, and would rather believe in conspiracy theories.*  
50 *(Male participant, in his 20s, from the Caribbean)*  
51  
52

53 *The [people] criticizing the government approach openly, both scientists, medical*  
54 *professionals, and ordinary people, have been ostracized here up until now. Many lose*  
55 *friends and are accused almost of "treason" when we care about the lives of our fellow*  
56 *citizens. (Female participant, in her 50s, Scandanavia)*  
57  
58



1  
2 *Subject to verbal abuse for leaving home. Public hysteria is such that many now*  
3 *labour under the misguided notion that stepping outside will lead to certain death. The*  
4 *media have exacerbated this and the government have done nothing to curb it.*  
5 (Female participant, in her 50s, Northern Europe)  
6

7  
8 *Claro al no tener miedo no sigo las recomendaciones y eso molesta a algunos* (Of  
9 course, not being afraid, I do not follow the recommendations and that annoys some)  
10 (Male participant, in his 40s, Central America)  
11

12 *Aggressed by people screaming "Stay at home" when you just do some jogging on*  
13 *your own, people calling the police because a child is outside playing alone in a*  
14 *condominium space.* (Male participant, 70s, Southern Europe)  
15  
16

17 One environment that emerges as a common site of COVID-19-related harassment/ bullying  
18 is the supermarket or other types of stores. Participants commonly note that encounters in  
19 the store environment can become contentious:  
20  
21  
22

23 *The staff at the grocery store told me that my ADA covered disability, "does not matter"*  
24 *because of COVID-19. I reported them.* (Female participant, 60s, North America)  
25

26 *My mother was told off for driving to the supermarket so I could put groceries in her*  
27 *boot. This was by a neighbor...* (Female participant, 50s, Oceania)  
28  
29

30 *Grocery shopper thought I wasn't using proper social distancing.* (Male participant, 50s  
31 Northern America)  
32

33 *Was pushed in a Dollar General store over toilet paper...* (Female participant, 50s,  
34 Northern America)  
35  
36

37 *I have witnessed people in the grocery store totally loose it when another person got*  
38 *too close.* (Male participant, 70s, Northern America)  
39  
40

41 *Some animal coughed over my wife. Store security arrested him and the police took*  
42 *the mongrel away. My wife has had to be tested each day for a week to ensure she*  
43 *had not contracted the virus. Happily, she did not test positive...* (Male participant, 60s,  
44 Oceania)  
45

46 *I went to a secondary supermarket in my town and was harassed by the shop guard;*  
47 *he felt that it was only appropriate for one person in a household to do the weekly*  
48 *shopping. I pay for my food, and my roommate pays for hers. Since we were at the*  
49 *store together, he felt that he would mess with us.* (Male participant, 40s, Northern  
50 Europe)  
51  
52

53 *Because I became a Person under Monitoring (a suspect case), neighbors were*  
54 *unwilling to talk to me in person. When I got to the convenience store, people would*  
55 *literally flee, or keep their distance.* (Woman participant, Southeast Asia, 50s)  
56  
57  
58  
59  
60

The second most commonly mentioned COVID-19-related harassment or bullying scenario participants note involves police, authorities, or government officials. As with the “Community” sources of bullying, these sources relate to specific incidents experienced by participants but also perceptions from implementation of prevention policies.

*En [country] el gobierno prohíbe - el uso de mascarillas en lugares públicos. (In [country], the government prohibited the use of masks in public places.) (Male participant, 50s, Central America)*

*The police harassed me when I was coming from the hospital at curfew hours. (40s male, Sub-Saharan Africa)*

*The cops scold us if they see us walking on the roads with face masks (South Asia, 50s, male)*

*I had to go to buy products, but police arrested my car, and sent me home. (Central Asian participant)*

*By the government, forbidding something as simple as going to the park while still allowing people to use public transport. (male, 30s, Central Europe)*

*Bullied by politicians. Can't go to park with kids and play tennis. Only one person should go shopping. Being under house arrest while criminals are set free. (North American woman, 50s)*

*Mon cousin a été maltraité par la police parce qu'il s'est retrouvé dehors après le couvre-feu. (My cousin was mistreated by the police because he ended up outside after curfew) (Female participant, late teens, Sub-Saharan Africa)*

One additional form of community-related COVID-19 harassment and bullying is through racist or other discriminatory actions, for instance:

*Seen a lot of racist graffiti around my city towards Asians. Also heard [racist slur] a few times. (Male participant from East Asia living in Northern America, in his 30s)*

*My nephew who is in fifth grade was bullied because of his nationality... (Female participant in her 30s, from North America)*

*My grandparents are Asian and Chinese, all the news stories hurt them because so many racist things are happening to Asians right now... (Female participant, in her early 20s, from Northern America)*

*Soy asiática y al principio (Febrero y antes) la gente me trataba mal por la calle y me evitaba. (I am Asian and at the beginning (February and before) people treated me badly on the street and avoided me) (30s female, living in Southwestern Europe, from Southeastern Asia)*

1  
2  
3 *As I belong to a particular religion, the people near my home keep on bullying us for*  
4 *the coronavirus, which is not fair.* (Moslem participant in South Asia, male, 20s)  
5

6  
7 Violence – both verbal and physical – was the third most commonly mentioned COVID-19-  
8 related bullying or harassment scenario, frequently linked to other coded thematic elements  
9 (such as the police, or racism).  
10  
11

12  
13 *I am of part Asian descent and have been bullied, harassed, spit on, blocked from*  
14 *getting goods, and told I am responsible for the "Chinese Virus" even though I am not*  
15 *from China and my Parents and Grandparents and Great Grandparents were all from*  
16 *[Northern America].* (male participant in his 50s, Northern America)  
17

18  
19 *The security agencies have been a pain, even hurting people for not beating the*  
20 *curfew...* (male participant, in his 40s, East Africa)  
21

22  
23 *Chronically ill or folks with cancer being verbally abused by folks for wearing a mask*  
24 *(before the masks for everyone recommendation hit a few days ago)...* (participant in  
25 their 30s, Northern America)  
26

27  
28 *Told in shop to f\*\*\* off out of my space by someone. People are on short fuse and*  
29 *very nasty...* (participant from Northern Europe)  
30

31 People commonly report health care environments and personnel as important contextual  
32 elements of COVID-19-related harassing and bullying situations, for example:  
33  
34

35  
36 *Mi cuñada cometió el error de salir a la calle con ropa quirúrgica (no es ni médico ni*  
37 *enfermera pero trabaja en un hospital...) y la gente la agredió en la calle (sólo*  
38 *insultos, pero si tuvo miedo)* (My sister-in-law made the mistake of going out in the  
39 street wearing surgical clothes (she is neither a doctor nor a nurse but works in a  
40 hospital...) and people attacked her on the street (only insults, but he was afraid)  
41 (Central America, female participant, 30s)  
42

43  
44 *Mi sobrina que es Médica, la hostigan en su domicilio los vecinos diciéndole que se*  
45 *vaya de allí...* (My niece, who is a doctor, is harassed at her home by the neighbors  
46 telling her to get out of there ...) (South American participant)  
47

48  
49 *Mi hijo es médico y me lo han ofendido en la calle acusándolo de traer el virus* (My  
50 son is a doctor and they have insulted me on the street accusing him of bringing the  
51 virus) (Male participant, 50s Central America)  
52

53  
54 *Mis familiares se dedican al sector salud, y sufrieron de hostigamiento por solicitar*  
55 *insumos de trabajo* (My relatives are engaged in the health sector, and they suffered  
56 harassment for requesting labor supplies) (Male participant, 50s, Central America)  
57  
58  
59  
60

1  
2 Health care workers commonly note that their personal experiences of COVID-19-related  
3 harassment and bullying involve their professional identities and the visible manifestations of  
4 those identities to the public:  
5  
6

7  
8 *Yes I have had some verbally abuse me on social media including a friend who called*  
9 *me something very unpleasant because I was having a very emotionally difficult*  
10 *weekend (50s, female participant, Northern Europe)*

11  
12  
13 *Unable to enter a supermarket because of being a nurse (Southeast Asia, Male*  
14 *participant, 30s)*

15  
16 *There have been isolated reports from some parts of the country that doctors have*  
17 *been harassed and asked to leave their apartment buildings (30s, Female participant,*  
18 *South Asia)*

19  
20  
21 *I've been ridiculed for trying to enforce physical distancing at my place of work. I've*  
22 *been purposely sneezed on at very close distance. There have been many rude and*  
23 *impatient customers that have been difficult to deal with. (50s, Female participant,*  
24 *Northern America)*

25  
26  
27 *Salir con uniforme médico es complicado, la gente es muy ignorante y nos agrede*  
28 *(Going out with a medical uniform is complicated, people are very ignorant and attack*  
29 *us) (Central America, 40s, Female participant)*

30  
31 *Pacientes exigen que se les atienda en servicios de emergencias en casos no*  
32 *urgentes (Patients demand that they be treated in emergency services in non-urgent*  
33 *cases) (South America participant)*

34  
35  
36 Though less common, some participants report that medical personnel or institutions  
37 perpetrated COVID-19-related harassing or bullying situations:  
38

39  
40  
41 *It was Doctors bullying the public when they should have had the courage to confront*  
42 *the Hospital CEO's and demand masks and PPE equipment be provided. I felt like*  
43 *saying "you stay home so I can go out" besides if the infection control measures were*  
44 *correct then if I wore gloves and keep a TWO or THREE meter physical distance then*  
45 *no Doctor will come to harm. It was unfounded, hysterical, unethical cheap marketing*  
46 *ploy at best and an undeserved guilt trip on the public at worst. I think Doctors and*  
47 *Nurses asked over the top, unreasonable, and unjustifiable restrictions on the public,*  
48 *i.e. to stay at home regardless of the cost. (Male participant, Oceania, 60s)*

## 51 52 **DISCUSSION**

53  
54  
55 We have demonstrated that health care workers around the world are statistically significantly  
56 more likely to experience COVID-19-related harassment, bullying, and hurt than others, even  
57

1  
2 after controlling for a range of confounding factors. Historically, infectious diseases have  
3 faced the most powerful stigma among public health concerns. Furthermore, potentially  
4 deadly conditions, new diseases, and illnesses without a known treatment or cure are other  
5 factors associated with an increased risk of experiencing stigmatization.(5)  
6  
7  
8  
9

10 The lived experience of COVID-19-related bullying among our participants relates frequently  
11 to their public identities as health care workers visible in and traversing through the  
12 community, frequently intersecting with other domains such as police, racism, and violence.  
13 There has been sharp increase in public sentiments of stereotyping and stigmatization of  
14 racial minorities due to COVID-19, especially towards Asian people worldwide.(26, 27) Racist  
15 and xenophobic rhetoric has spread along with the COVID-19 pandemic and is detrimental to  
16 the community's health, creating an atmosphere of fear and lack of safety. Perhaps as a  
17 consequence of this bullying and harassment, health care workers also are significantly more  
18 likely to feel that people with COVID-19 are gossiped about and lose status in the community.  
19 Interestingly, level of education – while higher in health care workers compared with others –  
20 was not associated with COVID-19-related bullying, suggesting that there was little difference  
21 in bullying experience among health workers in different roles. Similarly, while health care  
22 workers had significantly greater access to material assets (e.g., car, home), these assets  
23 were not related to reduced experience of bullying.  
24  
25  
26  
27  
28  
29  
30  
31  
32  
33  
34  
35

36 Health care workers, perhaps unsurprisingly, are substantially immersed in direct COVID-19  
37 experience: they are more likely to test positive for COVID-19 than others, more likely to feel  
38 they have had COVID-19 infection, and more likely to have known family, friends, or  
39 neighbors that became sick with COVID-19 or to know people who have died from it. These  
40 experiences are strongly related to COVID-19-related harassment and bullying and may, in  
41 part, account for the higher prevalence of COVID-19-related stigma beliefs among health  
42 care workers.  
43  
44  
45  
46  
47  
48  
49

50 As we observed, much of the exposure health care workers experience relates to their jobs;  
51 they are less likely to be able to do their jobs from home and are less likely to adhere to  
52 social-physical distancing, both of which place them at excess risk of experiencing COVID-  
53 19-related bullying by placing them in public and often in crowded situations. These situations  
54 are countered, perhaps, in that health care workers are significantly more likely to wear  
55  
56  
57  
58  
59  
60

1  
2 masks than others and wearing a mask is protective against COVID-19-related harassment  
3 and bullying. Health care workers commonly note that bullying they experience occurs in the  
4 context of public situations (e.g., in stores, and in their housing situations) while en route to  
5 and from their jobs, and through encounters with police that exceed curfews because of work  
6 hours.  
7  
8  
9

10  
11  
12 In part, stigma could be an expected consequence from the pandemic and from the resulting  
13 preventive strategies. Primary prevention of infection aims to reduce exposure to susceptible  
14 individuals as a source of infection. Due to their occupational exposure, health care workers  
15 are often viewed in the community as a potential source of the very infection that the  
16 community is trying to prevent.(7, 10) The resulting stigma associated with COVID-19,  
17 however, threatens the physical and mental health of health care workers.(6) A study  
18 including 906 health care workers from 5 major hospitals in Singapore and India reported a  
19 significant association between the prevalence of physical manifestation and psychological  
20 outcomes among health care workers during the COVID-19 outbreak. Results from the study  
21 identify headaches as the most common symptom and highlight a significant association  
22 between depression, anxiety, stress, and PTSD with the presence of physical symptoms.(28)  
23  
24  
25  
26  
27  
28  
29  
30  
31

32  
33 We found that health care workers are significantly more likely to have child and elder care  
34 responsibilities, roles that are statistically significantly associated with greater COVID-19-  
35 related bullying. Health care workers are also more likely to be medically vulnerable  
36 themselves, being significantly more likely to have a chronic health condition and to live with  
37 someone in their household who has a chronic health condition. Social media usage is more  
38 common among health care workers and is generally protective against COVID-19-related  
39 bullying; that said, some participants report social media as the vehicle through which  
40 bullying occurs.  
41  
42  
43  
44  
45  
46  
47

48 We found that about 13% of descriptions of harassing and bullying events were violent, either  
49 verbally or physically, the third most common code applied. Creating violence in workplaces  
50 leads to fear, worry, and suffering of the health care workers' own mental and physical  
51 health.(29) In the early phase of the pandemic, a qualitative study by Liu and colleagues  
52 showed that the health care workers had strong sense of responsibility and teamwork while  
53 facing immense pressure of heavy workloads, lack of protective gear, and feelings of  
54  
55  
56  
57  
58  
59

1  
2 powerless with patients.(30) Over time, however, health worker's physical and  
3  
4 psychological well-being is undermined by the constant pressures of discrimination,  
5  
6 stigmatization, social isolation, and burnout which will be detrimental for controlling the  
7  
8 spread of COVID-19.(31)  
9

10  
11 Prevalence of health care workers, COVID-19-related bullying and harassment, and COVID-  
12  
13 19-related stigma beliefs all varied significantly by region of the world. As a cluster, residents  
14  
15 in Africa, Asia, Northern America, and Oceania were more likely to experience bullying than  
16  
17 their counterparts in Latin America and Europe. Residents of Asia, Africa, and Latin America  
18  
19 were also more likely to believe COVID-19 was a stigmatizing condition, resulting in gossip  
20  
21 and lower social status.  
22

23  
24 A study conducted among 3551 adult non-health care workers (1716 from the U.S., and 1835  
25  
26 from Canada) measured indicators of stigmatization, COVID Stress Syndrome, and  
27  
28 avoidance affecting health care workers. Their findings suggest that the tendency to  
29  
30 stigmatize health care workers is associated with the COVID Stress Syndrome that consists  
31  
32 of fear that COVID-19 is highly dangerous, combined with the fear of being exposed to  
33  
34 potentially contaminated surfaces or objects, fear about socio-economic impact of COVID-19,  
35  
36 and fear that foreigners are the source of infection.(32) These factors appear related in our  
37  
38 study as well, with a mix of harassing experiences relating to perceptions of both over- and  
39  
40 under-caution, most commonly illustrated by masking in public places. Further, incidents of  
41  
42 racist harassment relate to perceptions of SARS-CoV-2's origins and fear of people  
43  
44 perceived as "foreign." At least one previous study shows that the severity of the COVID-19  
45  
46 pandemic is associated with the tendency to overestimate health risks in general.(7, 32)  
47  
48 COVID-related stigma around health care workers could be part of a wider tendency to  
49  
50 overestimate health threats and to exaggerate perceptions.(7)  
51

52  
53 The global nature of COVID-19-related harassment and bullying study is further endorsed in  
54  
55 numerous studies. Frontline health workers recovering from COVID-19 in LagosState, Nigeria  
56  
57 reported feeling stigmatized and psychologically and morally traumatized. When informed of  
58  
59 their positive COVID-19 status the majority of the respondents (who were knowledgeable on  
60  
COVID-19), however, reacted with denial, anxiety, distress, disorientation, crying for fear of  
stigmatization. Some of the challenges post-diagnosis include loneliness, worries about the

1  
2 state of their families, nondisclosure of status to family members, isolation centers with  
3 limited space, insomnia and, paradoxically, stigmatization by other health workers at the  
4 isolation center.(1) In Mexico, nurses were denied public transport and physically  
5 assaulted.(10) In India, doctors were asked to vacate from their homes and attacked while  
6 carrying out their duties, believing them to be a source of infection that spread in housing  
7 complexes.(33) Even children of doctors, ambulance drivers, family members of COVID-19  
8 patients, and discharged patients are shunned by the community. In the Philippines, a nurse  
9 was attacked by men pouring bleach on his face.(34) Many nurses are afraid to wear their  
10 uniforms outside of the health care settings, fearing for the safety of their own lives.(35)  
11  
12  
13  
14  
15  
16  
17  
18

### 19 **Strengths and Limitations**

20  
21 Our study is limited by our use of a single question to measure bullying and harassing  
22 experiences, where other studies of similar topics use more nuanced sets of measures. We  
23 also do not collect the participants' roles within the health settings where they work, which  
24 would perhaps distinguish the experiences of different job levels. Our use of social media  
25 also restricts the generalization of our findings, in particular in that countries without access to  
26 Facebook and mTURK (e.g., the People's Republic of China) are not represented. Also,  
27 people recruited through social media mechanisms may differ from others in the community  
28 with respect to literacy, technological access, and resources. That said, our study has several  
29 strengths, namely a large global sample size, four languages that cover much of the  
30 pandemic's reach at the time of data collection, a mixed methods design, and a robust  
31 guiding model of Critical Medical Ecology which helps contextualize concepts, roles, and  
32 levels of impact.  
33  
34  
35  
36  
37  
38  
39  
40  
41  
42

### 43 **Recommendations**

44  
45 In summary, health care workers are placed in closer contact with COVID-19 and the people  
46 infected by it. These workers are often vulnerable themselves (less job flexibility, more family  
47 responsibilities, greater medical risk) and even after controlling for a range of social and  
48 contextual variables, health care workers remain at considerable elevated risk of  
49 experiencing COVID-19-related stigma and bullying. In addition to impacting their own lives,  
50 stigma and bullying against health care workers impacts – even destabilizes – their families,  
51 neighborhoods, and patients. Addressing this issue requires understanding and addressing  
52 why people harass and stigmatize health care workers, and should aim to de-stigmatize  
53  
54  
55  
56  
57  
58  
59



1  
2 health workers through open dialogue and discussion among stakeholders in their  
3 communities. The United Nations has determined that violence against health care workers is  
4 a human rights violation and any acts of violence against health care workers discharging  
5 their duties should be condemned.(2) In the midst of a pandemic, making work environments  
6 safe and implementing measures to protect health care workers, their patients, and  
7 communities should be visioned as primary and essential prevention of COVID-19 itself,  
8 stress and mental health exacerbation at the individual and community levels, and  
9 interpersonal violence.  
10  
11  
12  
13  
14  
15

16  
17 Studies have shown that during public health emergencies, when immediate and reliable  
18 information is required, there are consistently, subgroups of people that are at greater risk of  
19 experiencing stigmatization, discrimination, and harassment; hence, will need special  
20 attention and protection.(36, 37) Efforts to reduce stigmatization, bullying, and harassment  
21 associated with COVID-19 cannot be isolated; actions should be the result of proactive  
22 collaboration between leaders from diverse sectors of our societies, including but not limited  
23 to governments, health organizations, religious leaders, and public figures, such as athletes,  
24 communicators, and social influencers.  
25  
26  
27  
28  
29  
30  
31

32  
33 Strategies for reducing health care worker risk of COVID-19-related bullying should include  
34 promotion of reliable and official sources of information, such as social media and other  
35 communication methods since misinformation can increase the levels of stress. Moreover,  
36 the message must be clear and oriented to increasing awareness while not promoting fear.  
37 Communities should be warned and instructed to identify and mitigate negative behaviors in  
38 order to support stigmatized groups. Lastly, groups at risk of experiencing stigmatization and  
39 bullying, such as health care workers, should first count on support and effective measures of  
40 protection in and out of their workplaces and communities. Furthermore, health care workers  
41 at risk of or who have experienced any type of offence must be provided with psychological  
42 support to overcome the different forms of aggression.  
43  
44  
45  
46  
47  
48  
49  
50  
51  
52  
53  
54  
55  
56  
57  
58  
59  
60

## ACKNOWLEDGEMENTS

We are grateful for the assistance of Connor DeAndrea-Lazarus, Kathleen Buckwell, Cody Gardner, and Carrie Dykes for logistical assistance with developing, reviewing, and implementing aspects of this project. We also acknowledge the contributions of Wyatte Hall, Carrie Irvine, Dongmei Li, Erin Muir, José G. Pérez Ramos, Sophia Wiltse, and Rebecca Royzer to the parent project of which this effort was a part.

## Author Statement

TD directed the design, implementation, and analysis of this study, and led the development of this manuscript. LA conducted background research and contributed to writing this manuscript. SS contributed to this study's design, conducted background research, and contributed to writing this manuscript. MB and SS contributed to this study's design, reviewed and coded qualitative data, and reviewed and edited drafts. TP reviewed and edited drafts and participated in the design of the study. EP contributed to the design of this study and reviewed the final manuscript. All co-authors reviewed and approved the final manuscript.

## Conflict of Interest Statement

The authors report no financial or other conflicts of interest with the content of this study. During the period of this study, Dr. Dye was the Principal Investigator on unrelated grants and contracts from the US National Institutes of Health, Pfizer Global Medical Grants, and the New York State AIDS Institute.

## Data Statement

Given the identifying and potentially stigmatizing nature of the data in this study, analyses are provided in this paper to support its conclusions though datasets are not publicly available. Interested investigators can request data from the Corresponding Author.

## REFERENCES

1. Kwaghe AV, Ilesanmi OS, Amede PO, Okediran JO, Utulu R, Balogun MS. Stigmatization, psychological and emotional trauma among frontline health care workers treated for COVID-19 in Lagos State, Nigeria: A qualitative study. 2020.
2. Council US. Resolution 2286 (2016). United Nations Security Council. 2016.
3. Safeguarding Health in Conflict Coalition. Health Workers at Risk: Violence Against Health Care. Accessed at [www.safeguardinghealth.org](http://www.safeguardinghealth.org), October 22, 2020. .
4. Devi S. COVID-19 exacerbates violence against health workers. *The Lancet*. 2020;396(10252):658.
5. Brewis A, Wutich A, Mahdavi P. Stigma, pandemics, and human biology: Looking back, looking forward. *American Journal of Human Biology*. 2020.
6. Bagcchi S. Stigma during the COVID-19 pandemic. *The Lancet Infectious Diseases*. 2020;20(7):782.

- 1
  - 2
  - 3
  - 4
  - 5
  - 6
  - 7 Taylor S, Landry CA, Rachor GS, Paluszek MM, Asmundson GJ. Fear and avoidance of
  - 8 healthcare workers: An important, under-recognized form of stigmatization during the COVID-19
  - 9 pandemic. *Journal of Anxiety Disorders*. 2020;75:102289.
  - 10
  - 11
  - 12
  - 13
  - 14
  - 15
  - 16
  - 17
  - 18
  - 19
  - 20
  - 21
  - 22
  - 23
  - 24
  - 25
  - 26
  - 27
  - 28
  - 29
  - 30
  - 31
  - 32
  - 33
  - 34
  - 35
  - 36
  - 37
  - 38
  - 39
  - 40
  - 41
  - 42
  - 43
  - 44
  - 45
  - 46
  - 47
  - 48
  - 49
  - 50
  - 51
  - 52
  - 53
  - 54
  - 55
  - 56
  - 57
  - 58
  - 59
  - 60
7. Taylor S, Landry CA, Rachor GS, Paluszek MM, Asmundson GJ. Fear and avoidance of healthcare workers: An important, under-recognized form of stigmatization during the COVID-19 pandemic. *Journal of Anxiety Disorders*. 2020;75:102289.
8. Ransing R, Ramalho R, de Filippis R, Ojeahere MI, Karaliuniene R, Orsolini L, et al. Infectious Disease Outbreak Related Stigma and Discrimination during the COVID-19 Pandemic: Drivers, Facilitators, Manifestations, and Outcomes across the World. *Brain, Behavior, and Immunity*. 2020.
9. McKay D, Heisler M, Mishori R, Catton H, Kloiber O. Attacks against health-care personnel must stop, especially as the world fights COVID-19. *The Lancet*. 2020;395(10239):1743-5.
10. Diaz M. Coronavirus: Health workers face violent attacks in Mexico. *BBC News*. <https://www.bbc.com/news/world-latin-america-52676939>. Published May 17, 2020. Accessed October 20, 2020.
11. Dye T, Levandowski B, Li D, Wiltse S, Muir E, Ramos JP, et al. Multilevel Analysis of Personal, Non-Medical COVID-19-Related Impact Worldwide. *Annals of Epidemiology*. 2020.
12. De Ver Dye T, Muir E, Farovitch L, Siddiqi S, Sharma S. Critical medical ecology and SARS-COV-2 in the urban environment: a pragmatic, dynamic approach to explaining and planning for research and practice. *Infectious Diseases of Poverty*. 2020;9(1):1-7.
13. Elm E, Altman DG, Egger M, Pocock SJ, Gøtzsche PC, Vandenbroucke JP. The Strengthening the Reporting of Observational Studies in Epidemiology (STROBE) statement: guidelines for reporting observational studies. *J Clin Epidemiol*. 2008;61.
14. Tong A, Sainsbury P, Craig J. Consolidated criteria for reporting qualitative research (COREQ): a 32-item checklist for interviews and focus groups. *International Journal for Quality in Health Care*. 2007;19(6):349-57.
15. Dong E, Du H, Gardner L. An interactive web-based dashboard to track COVID-19 in real time. *The Lancet infectious diseases*. 2020;20(5):533-4.
16. United Nations Statistics Division. Methodology—standard country or area codes for statistical use (M49). 2019 [
17. International Organization for Standardization. ISO Country Codes Collection: Online Browsing Platform 2020 [Available from: <https://www.iso.org/obp/ui/-search>.
18. Difallah D, Filatova E, Ipeirotis P, editors. Demographics and dynamics of mechanical Turk workers. *Proceedings of the Eleventh ACM International Conference on Web Search and Data Mining*; 2018.
19. Shaver LG, Khawer A, Yi Y, Aubrey-Bassler K, Etchegary H, Roebbothan B, et al. Using Facebook advertising to recruit representative samples: Feasibility assessment of a cross-sectional survey. *Journal of Medical Internet Research*. 2019;21(8):e14021.
20. Sheehan KB, Pittman M. *Amazon's Mechanical Turk for academics: The HIT handbook for social science research*: Melvin & Leigh, Publishers; 2016.
21. Moss AJ, Rosenzweig C, Robinson J, Litman L. Is it Ethical to Use Mechanical Turk for Behavioral Research? Relevant Data from a Representative Survey of MTurk Participants and Wages. 2020.
22. Dye T, Levandowski B, Siddiqi S, Pérez Ramos J, Li D, Sharma S, et al. Non-medical COVID-19-related personal impact in medical ecological perspective: A global multileveled, mixed method study. *PLOS ONE* 2020 (submitted). 2020.
23. Hamel L, Lopez L, Muñana C, Kates J, Michaud J, Brodie M. KFF Health Tracking Poll March 2020: <https://www.kff.org/coronavirus-covid-19/poll-finding/kff-coronavirus-poll-march-2020/>; 2020 [
24. Stangl A, Brady I, Fritz K. *Technical Brief: Measuring HIV stigma and discrimination*; International center for research on Women, Washington D.C., USA; 2012 (updated in 2018). 2018.

- 1  
2 25. Hosmer Jr DW, Lemeshow S. Applied logistic regression: John Wiley & Sons; 2004.
- 3 26. Roberto KJ, Johnson AF, Rauhaus BM. Stigmatization and prejudice during the COVID-19  
4 pandemic. *Administrative Theory & Praxis*. 2020;42(3):364-78.
- 5 27. Kandil C. Asian Americans report over 650 racist acts over last week, new data says. *NBC*  
6 *News*. 2020;26.
- 7 28. Chew NW, Lee GK, Tan BY, Jing M, Goh Y, Ngiam NJ, et al. A multinational, multicentre study  
8 on the psychological outcomes and associated physical symptoms amongst healthcare workers  
9 during COVID-19 outbreak. *Brain, behavior, and immunity*. 2020.
- 10 29. Sasaki N, Kuroda R, Tsuno K, Kawakami N. Fear, worry and workplace harassment related to  
11 the COVID-19 epidemic among employees in Japan: prevalence and impact on mental and physical  
12 health. Available at SSRN 3569887. 2020.
- 13 30. Liu Q, Luo D, Haase JE, Guo Q, Wang XQ, Liu S, et al. The experiences of health-care providers  
14 during the COVID-19 crisis in China: a qualitative study. *The Lancet Global Health*. 2020.
- 15 31. Xiong Y, Peng L. Focusing on health-care providers' experiences in the COVID-19 crisis. *The*  
16 *Lancet Global Health*. 2020;8(6):e740-e1.
- 17 32. Taylor S, Landry C, Paluszek M, Fergus TA, McKay D, Asmundson GJ. Development and initial  
18 validation of the COVID Stress Scales. *Journal of Anxiety Disorders*. 2020:102232.
- 19 33. Withnall A. Coronavirus: why India has had to pass new law against attacks on healthcare  
20 workers. *The Independent*. April 23, 2020. Accessed October 20, 2020.  
21 [https://www.independent.co.uk/news/world/asia/coronavirus-india-doctor-nurse-attack-law-modi-  
22 health-care-workers-a9480801.html](https://www.independent.co.uk/news/world/asia/coronavirus-india-doctor-nurse-attack-law-modi-health-care-workers-a9480801.html).
- 23 34. The Economist. Health workers become unexpected targets during COVID-19. *The*  
24 *Economist*. May 11, 2020. [https://www.economist.com/international/2020/05/11/health-workers-  
25 become-unexpected-targets-during-covid-19](https://www.economist.com/international/2020/05/11/health-workers-become-unexpected-targets-during-covid-19).
- 26 35. Semple K. 'Afraid to Be a Nurse': Health Workers Under Attack. *The New York Times*.  
27 Published April 27, 2020. Accessed October 20, 2020.  
28 <https://www.nytimes.com/2020/04/27/world/americas/coronavirus-health-workers-attacked.html>.
- 29 36. Abdelhafiz AS, Alorabi M. Social Stigma: The Hidden Threat of COVID-19. *Frontiers in public*  
30 *health*. 2020;8.
- 31 37. World Health Organization. Mental health and psychosocial considerations during the COVID-  
32 19 outbreak, 18 March 2020. World Health Organization; 2020.
- 33  
34  
35  
36  
37  
38  
39  
40  
41  
42  
43  
44  
45  
46  
47  
48  
49  
50  
51  
52  
53  
54  
55  
56  
57  
58  
59  
60

| <b>Table 1. Association of Demographic, Residential, Household, and COVID-19-related Variables with Working in Health Care Setting and COVID-19-related Harassment and Bullying</b>                 |                                                                                                                                          |                                                |              |                   |                |                                                                                                |                                                        |              |                   |                |
|-----------------------------------------------------------------------------------------------------------------------------------------------------------------------------------------------------|------------------------------------------------------------------------------------------------------------------------------------------|------------------------------------------------|--------------|-------------------|----------------|------------------------------------------------------------------------------------------------|--------------------------------------------------------|--------------|-------------------|----------------|
|                                                                                                                                                                                                     | <b>7. Do you work in a health care delivery setting, such as a doctor's office, clinic, hospital, nursing home, or dentist's office?</b> |                                                |              |                   |                | <b>7e. Have you or a family member been harassed, bullied, or hurt because of coronavirus?</b> |                                                        |              |                   |                |
|                                                                                                                                                                                                     | <b>No, I do not work in a health care setting</b>                                                                                        | <b>Yes, I do work in a health care setting</b> | <b>Total</b> | <b>Chi-square</b> | <b>p-value</b> | <b>Yes, I or someone have/ has been bullied</b>                                                | <b>No, I or someone have not/ has not been bullied</b> | <b>Total</b> | <b>Chi-square</b> | <b>p-value</b> |
| <b>9a. Among those tested: what was the result of the test for coronavirus?</b>                                                                                                                     |                                                                                                                                          |                                                |              |                   |                |                                                                                                |                                                        |              |                   |                |
| Tested COVID-19 positive                                                                                                                                                                            | 56 (47.5)                                                                                                                                | 62 (52.5)                                      | 118          | 13.301            | <.001          | 61 (51.7)                                                                                      | 57 (48.3)                                              | 118          | 47.636            | <.001          |
| Tested COVID-19 negative                                                                                                                                                                            | 199 (66.8)                                                                                                                               | 99 (33.2)                                      | 298          |                   |                | 54 (18.1)                                                                                      | 244 (81.9)                                             | 298          |                   |                |
| <b>12. Do you feel you now have - or have you recently had - coronavirus infection?</b>                                                                                                             |                                                                                                                                          |                                                |              |                   |                |                                                                                                |                                                        |              |                   |                |
| Believe have/ have had COVID-19                                                                                                                                                                     | 463 (75.4)                                                                                                                               | 151 (24.6)                                     | 614          | 100.442           | <.001          | 167 (27.2)                                                                                     | 446 (72.8)                                             | 613          | 314.954           | <.001          |
| Do not believe have/ have had COVID-19/DK if had COVID-19                                                                                                                                           | 5597 (89.2)                                                                                                                              | 678(10.8)                                      | 6275         |                   |                | 406 (6.5)                                                                                      | 5856 (93.5)                                            | 6262         |                   |                |
| <b>8. How closely are you following social or physical distancing, that is, staying at home, away from other people whenever you can, or staying away from other people when in a public place?</b> |                                                                                                                                          |                                                |              |                   |                |                                                                                                |                                                        |              |                   |                |
| Followed social distancing closely                                                                                                                                                                  | 5428 (88.3)                                                                                                                              | 716 (11.7)                                     | 6144         | 9.115             | 0.003          | 475 (7.7)                                                                                      | 5655 (92.3)                                            | 6130         | 26.960            | <.001          |
| Not followed social distancing closely                                                                                                                                                              | 647 (84.6)                                                                                                                               | 118 (15.4)                                     | 765          | 9.                |                | 101 (13.3)                                                                                     | 660 (86.7)                                             | 761          |                   |                |
| <b>b. Bought or worn a protective mask (since the coronavirus outbreak)</b>                                                                                                                         |                                                                                                                                          |                                                |              |                   |                |                                                                                                |                                                        |              |                   |                |
| Did not buy or wear mask                                                                                                                                                                            | 1350 (90.2)                                                                                                                              | 146 (9.8)                                      | 1496         | 6.433             | 0.011          | 164 (11.1)                                                                                     | 1309 (88.9)                                            | 1473         | 17.418            | <.001          |

**Table 1. Association of Demographic, Residential, Household, and COVID-19-related Variables with Working in Health Care Setting and COVID-19-related Harassment and Bullying**

|                                                                                                                                                                        | 7. Do you work in a health care delivery setting, such as a doctor's office, clinic, hospital, nursing home, or dentist's office? |                                         |       |            |         | 7e. Have you or a family member been harassed, bullied, or hurt because of coronavirus? |                                                 |       |            |         |
|------------------------------------------------------------------------------------------------------------------------------------------------------------------------|-----------------------------------------------------------------------------------------------------------------------------------|-----------------------------------------|-------|------------|---------|-----------------------------------------------------------------------------------------|-------------------------------------------------|-------|------------|---------|
|                                                                                                                                                                        | No, I do not work in a health care setting                                                                                        | Yes, I do work in a health care setting | Total | Chi-square | p-value | Yes, I or someone have/ has been bullied                                                | No, I or someone have not/ has not been bullied | Total | Chi-square | p-value |
| Bought or wore mask                                                                                                                                                    | 4943 (87.9)                                                                                                                       | 682 (12.1)                              | 5625  |            |         | 428 (7.7)                                                                               | 5108 (92.3)                                     | 5536  |            |         |
| <b>15. Do you personally know someone who has died from coronavirus infection (or COVID-19)?</b>                                                                       |                                                                                                                                   |                                         |       |            |         |                                                                                         |                                                 |       |            |         |
| Did not have family, friend, or neighbor die from COVID-19                                                                                                             | 6068 (90.6)                                                                                                                       | 626 (9.4)                               | 6694  | 260.557    | <.001   | 431 (6.8)                                                                               | 5905 (93.2)                                     | 6336  | 216.477    | <.001   |
| Had family, friend, or neighbor die from COVID-19                                                                                                                      | 506 (70.6)                                                                                                                        | 211 (29.4)                              | 717   |            |         | 164 (22.9)                                                                              | 551 (77.1)                                      | 715   |            |         |
| <b>14. Do you personally know someone who has coronavirus infection (or COVID-19)?</b>                                                                                 |                                                                                                                                   |                                         |       |            |         |                                                                                         |                                                 |       |            |         |
| Do not have family, friend, or neighbor with COVID-19                                                                                                                  | 5315 (91.3)                                                                                                                       | 505 (8.7)                               | 5820  | 185.332    | <.001   | 356 (6.5)                                                                               | 5106 (93.5)                                     | 5462  | 115.730    | <.001   |
| Have family, friend, or neighbor with COVID-19                                                                                                                         | 1259 (79.1)                                                                                                                       | 332 (20.9)                              | 1591  |            |         | 239 (15.0)                                                                              | 1350 (85.0)                                     | 1589  |            |         |
| <b>6. If you were required to remain at home because of quarantine or school or work closure, would you be able to do at least part of your job from home, or not?</b> |                                                                                                                                   |                                         |       |            |         |                                                                                         |                                                 |       |            |         |
| Could work from home/DK/NA                                                                                                                                             | 4678 (90.1)                                                                                                                       | 516 (9.9)                               | 5194  | 127.063    | <.001   | 367 (7.1)                                                                               | 4815 (92.9)                                     | 5182  | 42.824     | <.001   |
| Could not work from home                                                                                                                                               | 1138 (79.0)                                                                                                                       | 302 (21.0)                              | 1440  |            |         | 179 (12.4)                                                                              | 1259 (87.6)                                     | 1438  |            |         |

**Table 1. Association of Demographic, Residential, Household, and COVID-19-related Variables with Working in Health Care Setting and COVID-19-related Harassment and Bullying**

|                                                              | 7. Do you work in a health care delivery setting, such as a doctor's office, clinic, hospital, nursing home, or dentist's office? |                                         |       |            |         | 7e. Have you or a family member been harassed, bullied, or hurt because of coronavirus? |                                                 |       |            |         |
|--------------------------------------------------------------|-----------------------------------------------------------------------------------------------------------------------------------|-----------------------------------------|-------|------------|---------|-----------------------------------------------------------------------------------------|-------------------------------------------------|-------|------------|---------|
|                                                              | No, I do not work in a health care setting                                                                                        | Yes, I do work in a health care setting | Total | Chi-square | p-value | Yes, I or someone have/ has been bullied                                                | No, I or someone have not/ has not been bullied | Total | Chi-square | p-value |
| <b>5. What best describes your education?</b>                |                                                                                                                                   |                                         |       |            |         |                                                                                         |                                                 |       |            |         |
| High school or less education                                | 884 (92.8)                                                                                                                        | 69 (7.2)                                | 953   | 23.301     | <.001   | 77 (8.1)                                                                                | 873 (91.9)                                      | 950   | .120       | 0.729   |
| More than high school education                              | 4362 (87.2)                                                                                                                       | 638 (12.8)                              | 5000  |            |         | 387 (7.8)                                                                               | 4590 (92.2)                                     | 4977  |            |         |
| <b>1. What is your current age, in years?</b>                |                                                                                                                                   |                                         |       |            |         |                                                                                         |                                                 |       |            |         |
| Age under 32 years                                           | 1770 (87.8)                                                                                                                       | 247 (12.2)                              | 2017  | .149       | 0.7     | 165 (8.2)                                                                               | 1842 (91.8)                                     | 2007  | .127       | 0.721   |
| Age 32 years or more                                         | 3648 (88.1)                                                                                                                       | 493 (11.9)                              | 4141  |            |         | 328 (8.0)                                                                               | 3794 (92.0)                                     | 4122  |            |         |
| <b>9. Which of the following best describes your gender:</b> |                                                                                                                                   |                                         |       |            |         |                                                                                         |                                                 |       |            |         |
| Male                                                         | 2861 (88.7)                                                                                                                       | 366 (11.3)                              | 3227  | 3.647      | 0.161   | 294 (9.2)                                                                               | 2918 (90.8)                                     | 3212  | 43.042     | <.001   |
| Female                                                       | 2465 (87.2)                                                                                                                       | 363 (12.8)                              | 2828  |            |         | 188 (6.7)                                                                               | 2629 (93.3)                                     | 2817  |            |         |
| Other option                                                 | 33 (91.7)                                                                                                                         | 3 (8.3)                                 | 36    |            |         | 12 (33.3)                                                                               | 24 (66.7)                                       | 36    |            |         |
| <b>Use social media daily</b>                                |                                                                                                                                   |                                         |       |            |         |                                                                                         |                                                 |       |            |         |
| Does not use social media daily                              | 1494 (90.5)                                                                                                                       | 156 (9.5)                               | 1650  | 7.169      | 0.007   | 158 (12.1)                                                                              | 1146 (87.9)                                     | 1304  | 28.012     | <.001   |

**Table 1. Association of Demographic, Residential, Household, and COVID-19-related Variables with Working in Health Care Setting and COVID-19-related Harassment and Bullying**

|                                     | 7. Do you work in a health care delivery setting, such as a doctor's office, clinic, hospital, nursing home, or dentist's office? |                                         |       |            |         | 7e. Have you or a family member been harassed, bullied, or hurt because of coronavirus? |                                                 |       |            |         |
|-------------------------------------|-----------------------------------------------------------------------------------------------------------------------------------|-----------------------------------------|-------|------------|---------|-----------------------------------------------------------------------------------------|-------------------------------------------------|-------|------------|---------|
|                                     | No, I do not work in a health care setting                                                                                        | Yes, I do work in a health care setting | Total | Chi-square | p-value | Yes, I or someone have/ has been bullied                                                | No, I or someone have not/ has not been bullied | Total | Chi-square | p-value |
| Uses social media daily             | 5080 (88.2)                                                                                                                       | 681 (11.8)                              | 5761  |            |         | 437 (7.6)                                                                               | 5310 (92.4)                                     | 5747  |            |         |
| <b>UN Region of Residence</b>       |                                                                                                                                   |                                         |       |            |         |                                                                                         |                                                 |       |            |         |
| Africa region                       | 504 (86.4)                                                                                                                        | 79 (13.6)                               | 583   | 88.135     | <.001   | 59 (11.5)                                                                               | 455 (88.5)                                      | 514   | 54.964     | <.001   |
| Northern Africa                     | 130 (90.3)                                                                                                                        | 14 (9.7)                                | 144   |            |         | 4 (0.03.3)                                                                              | 116 (96.7)                                      | 120   |            |         |
| Sub-Saharan Africa                  | 374 (85.2)                                                                                                                        | 65 (14.8)                               | 439   |            |         | 55 (0.14.0)                                                                             | 339 (86.0)                                      | 394   |            |         |
| Sub-Saharan Africa: Eastern Africa  | 184 (83.3)                                                                                                                        | 37 (16.7)                               | 221   |            |         | 32 (0.16.1)                                                                             | 167 (83.9)                                      | 199   |            |         |
| Sub-Saharan Africa: Middle Africa   | 33 (89.2)                                                                                                                         | 4 (10.8)                                | 37    |            |         | 4 (0.12.1)                                                                              | 29 (87.9)                                       | 33    |            |         |
| Sub-Saharan Africa: Southern Africa | 60 (88.2)                                                                                                                         | 8 (11.8)                                | 68    |            |         | 11 (0.17.5)                                                                             | 52 (82.5)                                       | 63    |            |         |
| Sub-Saharan Africa: Western Africa  | 97 (85.8)                                                                                                                         | 16 (14.2)                               | 113   |            |         | 8 (0.08.1)                                                                              | 91 (91.9)                                       | 99    |            |         |
| Asia Region                         | 1227 (83.8)                                                                                                                       | 237 (16.2)                              | 1464  |            |         | 141 (0.10.3)                                                                            | 1234 (89.7)                                     | 1375  |            |         |
| Central Asia                        | 3 (75.0)                                                                                                                          | 1 (25.0)                                | 4     |            |         | 2 (0.50.0)                                                                              | 2 (50.0)                                        | 4     |            |         |
| Eastern Asia                        | 25 (96.2)                                                                                                                         | 1 (3.8)                                 | 26    |            |         | 1 (0.04.0)                                                                              | 24 (96.0)                                       | 25    |            |         |
| South-eastern Asia                  | 207 (90.4)                                                                                                                        | 22 (9.6)                                | 229   |            |         | 13 (0.06.1)                                                                             | 201 (93.9)                                      | 214   |            |         |
| Southern Asia                       | 924 (83.0)                                                                                                                        | 189 (17.0)                              | 1113  |            |         | 112 (0.10.7)                                                                            | 932 (89.3)                                      | 1044  |            |         |



**Table 1. Association of Demographic, Residential, Household, and COVID-19-related Variables with Working in Health Care Setting and COVID-19-related Harassment and Bullying**

|                                        | 7. Do you work in a health care delivery setting, such as a doctor's office, clinic, hospital, nursing home, or dentist's office? |                                         |       |            |         | 7e. Have you or a family member been harassed, bullied, or hurt because of coronavirus? |                                                 |       |            |         |
|----------------------------------------|-----------------------------------------------------------------------------------------------------------------------------------|-----------------------------------------|-------|------------|---------|-----------------------------------------------------------------------------------------|-------------------------------------------------|-------|------------|---------|
|                                        | No, I do not work in a health care setting                                                                                        | Yes, I do work in a health care setting | Total | Chi-square | p-value | Yes, I or someone have/ has been bullied                                                | No, I or someone have not/ has not been bullied | Total | Chi-square | p-value |
| Western Asia                           | 68 (73.9)                                                                                                                         | 24 (26.1)                               | 92    |            |         | 13 (0.14.8)                                                                             | 75 (85.2)                                       | 88    |            |         |
| Europe Region                          | 1448 (93.8)                                                                                                                       | 96 (6.2)                                | 1544  |            |         | 76 (5.0)                                                                                | 1433 (95.0)                                     | 1509  |            |         |
| Eastern Europe                         | 84 (91.3)                                                                                                                         | 8 (8.7)                                 | 92    |            |         | 8 (9.0)                                                                                 | 81 (91.0)                                       | 89    |            |         |
| Northern Europe                        | 464 (91.7)                                                                                                                        | 42 (8.3)                                | 506   |            |         | 34 (6.9)                                                                                | 462 (93.1)                                      | 496   |            |         |
| Southern Europe                        | 678 (95.1)                                                                                                                        | 35 (4.9)                                | 713   |            |         | 22 (3.2)                                                                                | 674 (96.8)                                      | 696   |            |         |
| Western Europe                         | 222 (95.3)                                                                                                                        | 11 (4.7)                                | 233   |            |         | 12 (5.3)                                                                                | 216 (94.7)                                      | 228   |            |         |
| Latin America and the Caribbean Region | 1458 (88.6)                                                                                                                       | 187 (11.4)                              | 1645  |            |         | 99 (6.4)                                                                                | 1459 (93.6)                                     | 1558  |            |         |
| Caribbean                              | 330 (85.3)                                                                                                                        | 57 (14.7)                               | 387   |            |         | 22 (6.0)                                                                                | 342 (94.0)                                      | 364   |            |         |
| Central America                        | 589 (88.7)                                                                                                                        | 75 (11.3)                               | 664   |            |         | 49 (7.8)                                                                                | 580 (92.2)                                      | 629   |            |         |
| South America                          | 539 (90.7)                                                                                                                        | 55 (9.3)                                | 594   |            |         | 28 (5.0)                                                                                | 537 (95.0)                                      | 565   |            |         |
| Northern America Region                | 1490 (87.9)                                                                                                                       | 205 (12.1)                              | 1695  |            |         | 172 (10.6)                                                                              | 1455 (89.4)                                     | 1627  |            |         |
| Oceania Region                         | 447 (93.1)                                                                                                                        | 33 (6.9)                                | 480   |            |         | 48 (10.3)                                                                               | 420 (89.7)                                      | 468   |            |         |
| Australia and New Zealand              | 402 (93.5)                                                                                                                        | 28 (6.5)                                | 430   |            |         | 41 (9.6)                                                                                | 385 (90.4)                                      | 426   |            |         |
| Melanesia                              | 21 (100.0)                                                                                                                        | 0 (0)                                   | 21    |            |         | 2 (13.3)                                                                                | 13 (86.7)                                       | 15    |            |         |
| Micronesia                             | 17 (100.0)                                                                                                                        | 0 (0)                                   | 17    |            |         | 0 (0)                                                                                   | 17 (100.0)                                      | 17    |            |         |

**Table 1. Association of Demographic, Residential, Household, and COVID-19-related Variables with Working in Health Care Setting and COVID-19-related Harassment and Bullying**

|                                                                                                                                                                   | 7. Do you work in a health care delivery setting, such as a doctor's office, clinic, hospital, nursing home, or dentist's office? |                                         |       |            |         | 7e. Have you or a family member been harassed, bullied, or hurt because of coronavirus? |                                                 |       |            |         |
|-------------------------------------------------------------------------------------------------------------------------------------------------------------------|-----------------------------------------------------------------------------------------------------------------------------------|-----------------------------------------|-------|------------|---------|-----------------------------------------------------------------------------------------|-------------------------------------------------|-------|------------|---------|
|                                                                                                                                                                   | No, I do not work in a health care setting                                                                                        | Yes, I do work in a health care setting | Total | Chi-square | p-value | Yes, I or someone have/ has been bullied                                                | No, I or someone have not/ has not been bullied | Total | Chi-square | p-value |
| Polynesia                                                                                                                                                         | 7 (58.3)                                                                                                                          | 5 (41.7)                                | 12    |            |         | 5 (50.0)                                                                                | 5 (50.0)                                        | 10    |            |         |
| <b>6. Do you or does someone in your household have a serious health condition such as high blood pressure, heart disease, lung disease, cancer, or diabetes?</b> |                                                                                                                                   |                                         |       |            |         |                                                                                         |                                                 |       |            |         |
| I do not have a chronic disease                                                                                                                                   | 5335 (90.4)                                                                                                                       | 569 (9.6)                               | 5904  | 79.522     | <.001   | 402 (7.2)                                                                               | 5146 (92.8)                                     | 5548  | 47.917     | <.001   |
| I have a chronic disease                                                                                                                                          | 1239 (82.2)                                                                                                                       | 268 (17.8)                              | 1507  |            |         | 193 (12.8)                                                                              | 1310 (87.2)                                     | 1503  |            |         |
| No one in my household has a chronic disease                                                                                                                      | 4927 (89.9)                                                                                                                       | 553 (10.1)                              | 5480  | 30.370     | <.001   | 421 (8.2)                                                                               | 4703 (91.8)                                     | 5124  | 1.199      | 0.274   |
| Someone else in my household has a chronic disease                                                                                                                | 1647 (85.3)                                                                                                                       | 284 (14.7)                              | 1931  |            |         | 174 (9.0)                                                                               | 1753 (91.0)                                     | 1927  |            |         |
| <b>10. Are you responsible for taking care of children?</b>                                                                                                       |                                                                                                                                   |                                         |       |            |         |                                                                                         |                                                 |       |            |         |
| I am not responsible for care of children                                                                                                                         | 3622 (90.3)                                                                                                                       | 388 (9.7)                               | 4010  | 66.162     | <.001   | 254 (6.3)                                                                               | 3748 (93.7)                                     | 4002  | 49.640     | <.001   |
| I am responsible for care of children                                                                                                                             | 2205 (83.6)                                                                                                                       | 432 (16.4)                              | 2637  |            |         | 295 (11.2)                                                                              | 2334 (88.8)                                     | 2629  |            |         |

**Table 1. Association of Demographic, Residential, Household, and COVID-19-related Variables with Working in Health Care Setting and COVID-19-related Harassment and Bullying**

|                                                                                                                                                               | 7. Do you work in a health care delivery setting, such as a doctor's office, clinic, hospital, nursing home, or dentist's office? |                                         |       | 7e. Have you or a family member been harassed, bullied, or hurt because of coronavirus? |         |                                          |                                                 |       |            |         |
|---------------------------------------------------------------------------------------------------------------------------------------------------------------|-----------------------------------------------------------------------------------------------------------------------------------|-----------------------------------------|-------|-----------------------------------------------------------------------------------------|---------|------------------------------------------|-------------------------------------------------|-------|------------|---------|
|                                                                                                                                                               | No, I do not work in a health care setting                                                                                        | Yes, I do work in a health care setting | Total | Chi-square                                                                              | p-value | Yes, I or someone have/ has been bullied | No, I or someone have not/ has not been bullied | Total | Chi-square | p-value |
| <b>11. Are you responsible for taking care of any elderly people?</b>                                                                                         |                                                                                                                                   |                                         |       |                                                                                         |         |                                          |                                                 |       |            |         |
| I am not responsible for care of elders                                                                                                                       | 4039 (91.4)                                                                                                                       | 378 (8.6)                               | 4417  | 168.604                                                                                 | <.001   | 254 (6.3)                                | 3748 (93.7)                                     | 4002  | 49.640     | <.001   |
| I am responsible for care of elders                                                                                                                           | 1855 (80.5)                                                                                                                       | 450 (19.5)                              | 2305  |                                                                                         |         | 289 (12.6)                               | 2009 (87.4)                                     | 2298  |            |         |
|                                                                                                                                                               |                                                                                                                                   |                                         |       |                                                                                         |         |                                          |                                                 |       |            |         |
| <b>7. Do anyone in your household work in a health care delivery setting, such as a doctor's office, clinic, hospital, nursing home, or dentist's office?</b> |                                                                                                                                   |                                         |       |                                                                                         |         |                                          |                                                 |       |            |         |
| No one else in my household works in a health care setting                                                                                                    | 5806 (88.5)                                                                                                                       | 754 (11.5)                              | 6560  | 2.278                                                                                   | 0.131   | 474 (7.6)                                | 5730 (92.4)                                     | 6204  | 42.597     | <.001   |
| Someone else in my household works in a health care setting                                                                                                   | 768 (90.2)                                                                                                                        | 83 (9.8)                                | 851   |                                                                                         |         | 121 (14.3)                               | 726 (85.7)                                      | 847   |            |         |
|                                                                                                                                                               |                                                                                                                                   |                                         |       |                                                                                         |         |                                          |                                                 |       |            |         |
| <b>1. Do you own a car?</b>                                                                                                                                   |                                                                                                                                   |                                         |       |                                                                                         |         |                                          |                                                 |       |            |         |
| I do not own a car                                                                                                                                            | 2299 (90.4)                                                                                                                       | 244 (9.6)                               | 2543  | 27.339                                                                                  | <.001   | 222 (8.8)                                | 2308 (91.2)                                     | 2530  | 1.188      | 0.276   |
| I own a car                                                                                                                                                   | 3668 (86.1)                                                                                                                       | 592 (13.9)                              | 4260  |                                                                                         |         | 341 (8.0)                                | 3911 (92.0)                                     | 4252  |            |         |
|                                                                                                                                                               |                                                                                                                                   |                                         |       |                                                                                         |         |                                          |                                                 |       |            |         |
| <b>2. Do you own a home?</b>                                                                                                                                  |                                                                                                                                   |                                         |       |                                                                                         |         |                                          |                                                 |       |            |         |
| I do not own a home                                                                                                                                           | 2305 (89.8)                                                                                                                       | 263 (10.2)                              | 2568  | 15.677                                                                                  | <.001   | 231 (9.0)                                | 2324 (91.0)                                     | 2555  | 2.839      | 0.092   |

**Table 1. Association of Demographic, Residential, Household, and COVID-19-related Variables with Working in Health Care Setting and COVID-19-related Harassment and Bullying**

|                                                                                                                                                         | 7. Do you work in a health care delivery setting, such as a doctor's office, clinic, hospital, nursing home, or dentist's office? |                                         |       |            |         | 7e. Have you or a family member been harassed, bullied, or hurt because of coronavirus? |                                                 |       |            |         |
|---------------------------------------------------------------------------------------------------------------------------------------------------------|-----------------------------------------------------------------------------------------------------------------------------------|-----------------------------------------|-------|------------|---------|-----------------------------------------------------------------------------------------|-------------------------------------------------|-------|------------|---------|
|                                                                                                                                                         | No, I do not work in a health care setting                                                                                        | Yes, I do work in a health care setting | Total | Chi-square | p-value | Yes, I or someone have/ has been bullied                                                | No, I or someone have not/ has not been bullied | Total | Chi-square | p-value |
| I own a home                                                                                                                                            | 3655 (86.5)                                                                                                                       | 570 (13.5)                              | 4225  |            |         | 332 (7.9)                                                                               | 3884 (92.1)                                     | 4216  |            |         |
| <b>17. Do people who have had coronavirus infection (or COVID-19) lose respect or status in the community?</b>                                          |                                                                                                                                   |                                         |       |            |         |                                                                                         |                                                 |       |            |         |
| People with COVID-19 lose status in the community                                                                                                       | 1208 (79.8)                                                                                                                       | 306 (20.2)                              | 1514  | 119.934    |         | 264 (17.5)                                                                              | 1241 (82.5)                                     | 1505  | 215.153    | <.001   |
| People with COVID-19 do not lose status in the community                                                                                                | 4865 (90.2)                                                                                                                       | 530 (9.8)                               | 5395  |            |         | 309 (5.7)                                                                               | 5079 (94.3)                                     | 5388  |            |         |
| <b>16. Do people talk badly or gossip about other people who are living with, have had, or are thought to have coronavirus infection (or COVID-19)?</b> |                                                                                                                                   |                                         |       |            |         |                                                                                         |                                                 |       |            |         |
| People gossip about other people with COVID-19                                                                                                          | 1525 (81.2)                                                                                                                       | 353 (18.8)                              | 1878  | 111.356    | <.001   | 274 (14.6)                                                                              | 1598 (85.4)                                     | 1872  | 135.154    | <.001   |
| People do not gossip about other people with COVID-19                                                                                                   | 4532 (90.5)                                                                                                                       | 476 (9.5)                               | 5008  |            |         | 297 (5.9)                                                                               | 4702 (94.1)                                     | 4999  |            |         |

**Table 2. Bivariate and Multivariate Analysis of Work in Health Care Settings and COVID-19-related Harassment and Bullying**

|                                                                                                                                                                      | 7e. Have you or a family member been harassed, bullied, or hurt because of coronavirus? |                                                 |       |            |         | Model 1: Unadjusted Odds Ratio (OR; 95% CI) | Model 2: Adjusted* Odds Ratio (aOR; 95% CI) |
|----------------------------------------------------------------------------------------------------------------------------------------------------------------------|-----------------------------------------------------------------------------------------|-------------------------------------------------|-------|------------|---------|---------------------------------------------|---------------------------------------------|
|                                                                                                                                                                      | Yes, I or someone have/ has been bullied                                                | No, I or someone have not/ has not been bullied | Total | Chi-square | p-value |                                             |                                             |
| <b>7. Do you or anyone in your household work in a health care delivery setting, such as a doctor's office, clinic, hospital, nursing home, or dentist's office?</b> |                                                                                         |                                                 |       |            |         |                                             |                                             |
| I work in a health care setting                                                                                                                                      | 151 (18.1)                                                                              | 685 (81.9)                                      | 836   | 113.689    | <.001   | 2.9 (2.3, 3.5)                              | 1.5 (1.2, 1.9)                              |
| I do not work in a health care setting                                                                                                                               | 444 (7.1)                                                                               | 5771 (92.9)                                     | 6215  |            |         |                                             |                                             |

\*Adjusted for: Could not work from home, Have/ have had COVID-19, Have not closely followed social-physical distancing, Have friend/ family/ neighbor with COVID-19, Have friend/ family/ neighbor who died from COVID-19, Have at least one chronic disease, Have child care responsibilities, Have elder care responsibilities, Reside in Africa/ Asia/ Northern America/ Oceania

**Table 3: Frequency of qualitative codes applied to COVID-19-related harassment/ bullied/ hurt excerpts**

| Qualitative Code ( <i>7e. Been harassed, bullied, or hurt because of coronavirus, please explain</i> ) | Applied to excerpts (number of people (%))* | Example quotation                                                                                                                                                                                                                                                                                                         |
|--------------------------------------------------------------------------------------------------------|---------------------------------------------|---------------------------------------------------------------------------------------------------------------------------------------------------------------------------------------------------------------------------------------------------------------------------------------------------------------------------|
| Happened in/ related to the community                                                                  | 109 (33.1)                                  | <i>Mi sobrina que es Medica, la Hostigan en su domicilio los vecinos diciendolae que se valla de alli...</i> (My niece, who is a doctor, is harassed at her home by the neighbors telling her to get out of there...) (Participant from South America)                                                                    |
| Happened with police/ government officials                                                             | 45 (13.7)                                   | <i>The military police use very high handed methods at roadblocks and when the curfew hours start in the evening. I will just say it like that.</i> (Male participant, 50s, from Sub-Saharan Africa)                                                                                                                      |
| Involved violence                                                                                      | 44 (13.4)                                   | <i>Son [is] deputy supermarket manager - has been threatened and verbally abused at work.</i> (Participant from Western Europe, 60s)                                                                                                                                                                                      |
| Racism                                                                                                 | 27 (8.2)                                    | <i>My partner and his family as Asian, and they have been on the receiving end of racist remarks and harassment for the last 3 months because of this virus.</i> (Early 20s, other gender, Northern Europe)                                                                                                               |
| Happened in social media/ popular media                                                                | 23 (7.0)                                    | <i>Verbal harassment on social media from COVID-19 nay-sayers</i> (Male participant, 60s, North America)                                                                                                                                                                                                                  |
| Happened in/ related to work                                                                           | 21 (6.4)                                    | <i>Mi esposa trabaja en un hospital. Los vecinos no nos hablan.</i> (My wife works in a hospital. Neighbors don't speak to us.) (Male participant, 30s, Caribbean)                                                                                                                                                        |
| Happened within the family                                                                             | 19 (5.8)                                    | <i>We were harassed and bullied by our overseas family, they called us cowards and a lot of other nasty things and tried to pressure us into continuing with overseas travel plans (we had asked them not to visit us as previously planned due to concerns about the virus).</i> (Female participant, 20s, from Oceania) |
| Bullied for wearing mask                                                                               | 15 (4.6)                                    | <i>Yelled at for wearing a mask. Coughed on at a gas station. Just hate going out...</i> (Female participant, 60s, from North America)                                                                                                                                                                                    |
| Bullied for NOT wearing a mask                                                                         | 7 (2.1)                                     | <i>E' stato picchiato poichè non aveva la mascherina. Ma non è colpa sua se non è possibile comprarle o trovarle nei negozi..</i> (He was beaten because he didn't have a mask. But it's not his fault that you can't buy them or find them in stores.) (Male participant, 20s, from Southern Europe)                     |

# Reporting checklist for cross sectional study.

Based on the STROBE cross sectional guidelines.

## Instructions to authors

Complete this checklist by entering the page numbers from your manuscript where readers will find each of the items listed below.

Your article may not currently address all the items on the checklist. Please modify your text to include the missing information. If you are certain that an item does not apply, please write "n/a" and provide a short explanation.

Upload your completed checklist as an extra file when you submit to a journal.

In your methods section, say that you used the STROBE cross sectional reporting guidelines, and cite them as:

von Elm E, Altman DG, Egger M, Pocock SJ, Gotsche PC, Vandenbroucke JP. The Strengthening the Reporting of Observational Studies in Epidemiology (STROBE) Statement: guidelines for reporting observational studies.

|                           |                     | Reporting Item                                                                                  | Page Number |
|---------------------------|---------------------|-------------------------------------------------------------------------------------------------|-------------|
| <b>Title and abstract</b> |                     |                                                                                                 |             |
| Title                     | <a href="#">#1a</a> | Indicate the study's design with a commonly used term in the title or the abstract              | 2           |
| Abstract                  | <a href="#">#1b</a> | Provide in the abstract an informative and balanced summary of what was done and what was found | 2           |
| <b>Introduction</b>       |                     |                                                                                                 |             |
| Background / rationale    | <a href="#">#2</a>  | Explain the scientific background and rationale for the investigation being reported            | 3           |
| Objectives                | <a href="#">#3</a>  | State specific objectives, including any prespecified hypotheses                                | 4           |
| <b>Methods</b>            |                     |                                                                                                 |             |
| Study design              | <a href="#">#4</a>  | Present key elements of study design early in the paper                                         | 4           |
| Setting                   | <a href="#">#5</a>  | Describe the setting, locations, and relevant dates, including periods of                       | 5           |

recruitment, exposure, follow-up, and data collection

|    |                      |                      |   |
|----|----------------------|----------------------|---|
| 1  |                      |                      |   |
| 2  |                      |                      |   |
| 3  | Eligibility criteria | <a href="#">#6a</a>  | 6 |
| 4  |                      |                      |   |
| 5  |                      |                      |   |
| 6  |                      | <a href="#">#7</a>   | 6 |
| 7  |                      |                      |   |
| 8  |                      |                      |   |
| 9  |                      |                      |   |
| 10 | Data sources /       | <a href="#">#8</a>   | 6 |
| 11 | measurement          |                      |   |
| 12 |                      |                      |   |
| 13 |                      |                      |   |
| 14 |                      |                      |   |
| 15 |                      |                      |   |
| 16 |                      |                      |   |
| 17 | Bias                 | <a href="#">#9</a>   | 5 |
| 18 |                      |                      |   |
| 19 | Study size           | <a href="#">#10</a>  | 5 |
| 20 |                      |                      |   |
| 21 | Quantitative         | <a href="#">#11</a>  | 7 |
| 22 | variables            |                      |   |
| 23 |                      |                      |   |
| 24 |                      |                      |   |
| 25 | Statistical          | <a href="#">#12a</a> | 7 |
| 26 | methods              |                      |   |
| 27 |                      |                      |   |
| 28 |                      |                      |   |
| 29 | Statistical          | <a href="#">#12b</a> | 7 |
| 30 | methods              |                      |   |
| 31 |                      |                      |   |
| 32 |                      |                      |   |
| 33 | Statistical          | <a href="#">#12c</a> | 7 |
| 34 | methods              |                      |   |
| 35 |                      |                      |   |
| 36 |                      |                      |   |
| 37 | Statistical          | <a href="#">#12d</a> | 7 |
| 38 | methods              |                      |   |
| 39 |                      |                      |   |
| 40 |                      |                      |   |
| 41 | Statistical          | <a href="#">#12e</a> | 7 |
| 42 | methods              |                      |   |
| 43 |                      |                      |   |
| 44 | <b>Results</b>       |                      |   |
| 45 |                      |                      |   |
| 46 |                      |                      |   |
| 47 | Participants         | <a href="#">#13a</a> | 8 |
| 48 |                      |                      |   |
| 49 |                      |                      |   |
| 50 |                      |                      |   |
| 51 |                      |                      |   |
| 52 |                      |                      |   |
| 53 |                      |                      |   |
| 54 |                      |                      |   |
| 55 | Participants         | <a href="#">#13b</a> | 5 |
| 56 |                      |                      |   |
| 57 | Participants         | <a href="#">#13c</a> | 5 |
| 58 |                      |                      |   |
| 59 |                      |                      |   |
| 60 |                      |                      |   |



|    |                    |                      |                                                                                                                                                                                                                   |    |
|----|--------------------|----------------------|-------------------------------------------------------------------------------------------------------------------------------------------------------------------------------------------------------------------|----|
| 1  | Descriptive data   | <a href="#">#14a</a> | Give characteristics of study participants (eg demographic, clinical, social) and information on exposures and potential confounders. Give information separately for exposed and unexposed groups if applicable. | 8  |
| 2  |                    |                      |                                                                                                                                                                                                                   |    |
| 3  |                    |                      |                                                                                                                                                                                                                   |    |
| 4  |                    |                      |                                                                                                                                                                                                                   |    |
| 5  |                    |                      |                                                                                                                                                                                                                   |    |
| 6  | Descriptive data   | <a href="#">#14b</a> | Indicate number of participants with missing data for each variable of interest                                                                                                                                   | 8  |
| 7  |                    |                      |                                                                                                                                                                                                                   |    |
| 8  |                    |                      |                                                                                                                                                                                                                   |    |
| 9  |                    |                      |                                                                                                                                                                                                                   |    |
| 10 | Outcome data       | <a href="#">#15</a>  | Report numbers of outcome events or summary measures. Give information separately for exposed and unexposed groups if applicable.                                                                                 | 8  |
| 11 |                    |                      |                                                                                                                                                                                                                   |    |
| 12 |                    |                      |                                                                                                                                                                                                                   |    |
| 13 |                    |                      |                                                                                                                                                                                                                   |    |
| 14 | Main results       | <a href="#">#16a</a> | Give unadjusted estimates and, if applicable, confounder-adjusted estimates and their precision (eg, 95% confidence interval). Make clear which confounders were adjusted for and why they were included          | 11 |
| 15 |                    |                      |                                                                                                                                                                                                                   |    |
| 16 |                    |                      |                                                                                                                                                                                                                   |    |
| 17 |                    |                      |                                                                                                                                                                                                                   |    |
| 18 |                    |                      |                                                                                                                                                                                                                   |    |
| 19 | Main results       | <a href="#">#16b</a> | Report category boundaries when continuous variables were categorized                                                                                                                                             | 8  |
| 20 |                    |                      |                                                                                                                                                                                                                   |    |
| 21 | Main results       | <a href="#">#16c</a> | If relevant, consider translating estimates of relative risk into absolute risk for a meaningful time period                                                                                                      | 11 |
| 22 |                    |                      |                                                                                                                                                                                                                   |    |
| 23 |                    |                      |                                                                                                                                                                                                                   |    |
| 24 |                    |                      |                                                                                                                                                                                                                   |    |
| 25 | Other analyses     | <a href="#">#17</a>  | Report other analyses done—e.g., analyses of subgroups and interactions, and sensitivity analyses                                                                                                                 | 12 |
| 26 |                    |                      |                                                                                                                                                                                                                   |    |
| 27 |                    |                      |                                                                                                                                                                                                                   |    |
| 28 |                    |                      |                                                                                                                                                                                                                   |    |
| 29 | <b>Discussion</b>  |                      |                                                                                                                                                                                                                   |    |
| 30 |                    |                      |                                                                                                                                                                                                                   |    |
| 31 | Key results        | <a href="#">#18</a>  | Summarise key results with reference to study objectives                                                                                                                                                          | 16 |
| 32 |                    |                      |                                                                                                                                                                                                                   |    |
| 33 |                    |                      |                                                                                                                                                                                                                   |    |
| 34 | Limitations        | <a href="#">#19</a>  | Discuss limitations of the study, taking into account sources of potential bias or imprecision. Discuss both direction and magnitude of any potential bias.                                                       | 20 |
| 35 |                    |                      |                                                                                                                                                                                                                   |    |
| 36 |                    |                      |                                                                                                                                                                                                                   |    |
| 37 |                    |                      |                                                                                                                                                                                                                   |    |
| 38 |                    |                      |                                                                                                                                                                                                                   |    |
| 39 | Interpretation     | <a href="#">#20</a>  | Give a cautious overall interpretation considering objectives, limitations, multiplicity of analyses, results from similar studies, and other relevant evidence.                                                  | 21 |
| 40 |                    |                      |                                                                                                                                                                                                                   |    |
| 41 |                    |                      |                                                                                                                                                                                                                   |    |
| 42 |                    |                      |                                                                                                                                                                                                                   |    |
| 43 |                    |                      |                                                                                                                                                                                                                   |    |
| 44 | Generalisability   | <a href="#">#21</a>  | Discuss the generalisability (external validity) of the study results                                                                                                                                             | 21 |
| 45 |                    |                      |                                                                                                                                                                                                                   |    |
| 46 |                    |                      |                                                                                                                                                                                                                   |    |
| 47 | <b>Other</b>       |                      |                                                                                                                                                                                                                   |    |
| 48 | <b>Information</b> |                      |                                                                                                                                                                                                                   |    |
| 49 |                    |                      |                                                                                                                                                                                                                   |    |
| 50 |                    |                      |                                                                                                                                                                                                                   |    |
| 51 | Funding            | <a href="#">#22</a>  | Give the source of funding and the role of the funders for the present study and, if applicable, for the original study on which the present article is based                                                     | 2  |
| 52 |                    |                      |                                                                                                                                                                                                                   |    |
| 53 |                    |                      |                                                                                                                                                                                                                   |    |
| 54 |                    |                      |                                                                                                                                                                                                                   |    |
| 55 |                    |                      |                                                                                                                                                                                                                   |    |

The STROBE checklist is distributed under the terms of the Creative Commons Attribution License CC-BY.

This checklist was completed on 04. November 2020 using <https://www.goodreports.org/>, a tool made by the

[EQUATOR Network](#) in collaboration with [Penelope.ai](#)

For peer review only - <http://bmjopen.bmj.com/site/about/guidelines.xhtml>

# BMJ Open

## Risk of COVID-19-related bullying, harassment, and stigma among health care workers: An analytical cross-sectional global study

|                                 |                                                                                                                                                                                                                                                                                                                                                                                                                                                                                                                                                                                                                                                                                                                       |
|---------------------------------|-----------------------------------------------------------------------------------------------------------------------------------------------------------------------------------------------------------------------------------------------------------------------------------------------------------------------------------------------------------------------------------------------------------------------------------------------------------------------------------------------------------------------------------------------------------------------------------------------------------------------------------------------------------------------------------------------------------------------|
| Journal:                        | <i>BMJ Open</i>                                                                                                                                                                                                                                                                                                                                                                                                                                                                                                                                                                                                                                                                                                       |
| Manuscript ID                   | bmjopen-2020-046620.R1                                                                                                                                                                                                                                                                                                                                                                                                                                                                                                                                                                                                                                                                                                |
| Article Type:                   | Original research                                                                                                                                                                                                                                                                                                                                                                                                                                                                                                                                                                                                                                                                                                     |
| Date Submitted by the Author:   | 05-Dec-2020                                                                                                                                                                                                                                                                                                                                                                                                                                                                                                                                                                                                                                                                                                           |
| Complete List of Authors:       | Dye, Timothy ; University of Rochester Medical Center, Obstetrics and Gynecology; University of Rochester Medical Center, University of Rochester School of Medicine and Dentistry<br>Alcantara, Lisette; University of Rochester Medical Center, Obstetrics and Gynecology<br>Siddiqi, Shazia; University of Rochester Medical Center, Obstetrics and Gynecology<br>Barbosu, Monica; University of Rochester Medical Center, Obstetrics and Gynecology<br>Sharma, Saloni; University of Rochester Medical Center, Obstetrics and Gynecology<br>Panko, Tiffany; University of Rochester Medical Center, Obstetrics and Gynecology<br>Pressman, Eva; University of Rochester Medical Center, Obstetrics and Gynecology |
| <b>Primary Subject Heading</b>: | Public health                                                                                                                                                                                                                                                                                                                                                                                                                                                                                                                                                                                                                                                                                                         |
| Secondary Subject Heading:      | Epidemiology, Global health, Infectious diseases, Mental health                                                                                                                                                                                                                                                                                                                                                                                                                                                                                                                                                                                                                                                       |
| Keywords:                       | COVID-19, PUBLIC HEALTH, Public health < INFECTIOUS DISEASES, EPIDEMIOLOGY                                                                                                                                                                                                                                                                                                                                                                                                                                                                                                                                                                                                                                            |
|                                 |                                                                                                                                                                                                                                                                                                                                                                                                                                                                                                                                                                                                                                                                                                                       |

SCHOLARONE™  
Manuscripts



I, the Submitting Author has the right to grant and does grant on behalf of all authors of the Work (as defined in the below author licence), an exclusive licence and/or a non-exclusive licence for contributions from authors who are: i) UK Crown employees; ii) where BMJ has agreed a CC-BY licence shall apply, and/or iii) in accordance with the terms applicable for US Federal Government officers or employees acting as part of their official duties; on a worldwide, perpetual, irrevocable, royalty-free basis to BMJ Publishing Group Ltd ("BMJ") its licensees and where the relevant Journal is co-owned by BMJ to the co-owners of the Journal, to publish the Work in this journal and any other BMJ products and to exploit all rights, as set out in our [licence](#).

The Submitting Author accepts and understands that any supply made under these terms is made by BMJ to the Submitting Author unless you are acting as an employee on behalf of your employer or a postgraduate student of an affiliated institution which is paying any applicable article publishing charge ("APC") for Open Access articles. Where the Submitting Author wishes to make the Work available on an Open Access basis (and intends to pay the relevant APC), the terms of reuse of such Open Access shall be governed by a Creative Commons licence – details of these licences and which [Creative Commons](#) licence will apply to this Work are set out in our licence referred to above.

Other than as permitted in any relevant BMJ Author's Self Archiving Policies, I confirm this Work has not been accepted for publication elsewhere, is not being considered for publication elsewhere and does not duplicate material already published. I confirm all authors consent to publication of this Work and authorise the granting of this licence.

1  
2  
3 **Risk of COVID-19-related bullying, harassment, and stigma among health care**  
4 **workers: An analytical cross-sectional global study**  
5

6 Timothy Dye, PhD (tim\_dye@urmc.rochester.edu)  
7 Lisette Alcantara, MD (Lisette\_Alcantara@URMC.Rochester.edu)  
8 Shazia Siddiqi, MD (Shazia\_Siddiqi@URMC.Rochester.edu)  
9 Monica Barbosu, MD (Monica\_Barbosu@URMC.Rochester.edu)  
10 Saloni Sharma, MBBS (saloni.sharma@chet.rochester.edu)  
11 Tiffany L. Panko, MD (Tiffany\_Panko@urmc.rochester.edu)  
12 Eva Pressman, MD (Eva\_Pressman@URMC.Rochester.edu)  
13  
14

15  
16 University of Rochester  
17 School of Medicine and Dentistry  
18 Department of Obstetrics and Gynecology  
19 Rochester, New York USA  
20  
21  
22  
23  
24  
25  
26  
27  
28  
29  
30  
31  
32  
33  
34

35 Corresponding author:  
36 Timothy De Ver Dye, PhD  
37 University of Rochester School of Medicine and Dentistry  
38 601 Elmwood Avenue  
39 Rochester, New York USA 14642  
40 585.276.6953  
41 tim\_dye@urmc.rochester.edu  
42  
43

44 Keywords: COVID-19, Stigma, Healthcare Providers, Workforce, Global, Mixed Methods,  
45 Qualitative, Quantitative, Bullying  
46  
47

48 Word count: 6935  
49  
50  
51  
52  
53  
54  
55  
56  
57  
58  
59  
60

## ABSTRACT

**Objectives:** Essential health care workers (HCW) uniquely serve as both COVID-19 healers and, potentially, as carriers of SARS-CoV-2. We assessed COVID-19-related stigma and bullying against HCW controlling for social, psychological, medical, and community variables.

**Design:** We nested an analytical cross-sectional study of COVID-19-related stigma and bullying among HCW within a larger mixed-methods effort assessing COVID-19-related lived experience and impact. Adjusted Odds Ratios (aOR) and 95% confidence intervals evaluated the association between working in health care settings and experience of COVID-19-related bullying and stigma, controlling for confounders. Thematic qualitative analysis provided insight into lived experience of COVID-19-related bullying.

**Setting:** We recruited potential participants in four languages (English, Spanish, French, Italian) through Amazon Mechanical Turk's online workforce and Facebook.

**Participants:** Our sample included 7,411 people from 173 countries who were age 18 or over.

**Findings:** HCW significantly experienced more COVID-19-related bullying after controlling for the confounding effects of job-related, personal, geographic, and sociocultural variables (aOR: 1.5; 95%CI: 1.2, 2.0). HCW more frequently believed that people gossip about others with COVID-19 (OR: 2.2; 95%CI: 1.9, 2.6) and that people with COVID-19 lose respect in the community (OR: 2.3; 95%CI: 2.0, 2.7), both which elevate bullying risk (OR: 2.7; 95% CI: 2.3, 3.2, and OR: 3.5; 95% CI: 2.9, 4.2, respectively). The lived experience of COVID-19-related bullying relates frequently to public identities as HCW traverse through the community, intersecting with other domains (e.g., police, racism, violence).

**Interpretation:** After controlling for a range of confounding factors, HCW are significantly more likely to experience COVID-19-related stigma and bullying, often in the intersectional context of racism, violence, and police involvement in community settings.

## Funding

This work was funded by The Richard W. & Mae Stone Goode Foundation, Award # 057843-002. Drs. Sharma and Alcantara are trainees in the University of Rochester's Translational Biomedical Science PhD Program, which is supported by Grant 2TL1TR002000-05 from the National Center for Advancing Translational Sciences, National Institutes of Health. Dr. Alcantara is additionally supported by funds from BWF1014095 from the Burroughs Wellcome Fund. Drs. Siddiqi and Panko are supported by the National Institute of General Medical Sciences of the National Institute of Health under Award Number K12GM106997. We also accessed the recruitment and REDCap resources of the University of Rochester CTSA, award number UL1 TR002001 from the National Center for Advancing Translational Sciences of the National Institutes of Health. The funders had no role in the study design, data collection and analysis, decision to publish, or preparation of this manuscript.

## Article Summary: Strengths and limitations of this study

- A large, mixed method global assessment of COVID-19-related stigma and bullying with 7,411 research participants from 173 countries.
- Research participants accessed the study through a recruitment link distributed through Amazon's mTURK and Facebook, Instagram, and the Facebook Audience Network.
- Study was conducted in the four predominant languages (Spanish, Italian, French, and English) where COVID-19 was most prevalent at the time of data collection.
- People without access to the internet or to these tools were unable to participate in this study.
- COVID-19-related stigma and bullying was assessed with three questions developed and tested for this study to categorize perception and experience, but we did not use more lengthy, multi-item scales that may provide nuanced information about bullying and stigma.

## INTRODUCTION

Stigma refers to a set of social processes invoked to label, separate, and discriminate against others in a way that interferes with that individual's (or group's) life chances and opportunities.(1, 2) Stigma in the context of health care represents a major barrier to sustain access to care while assuring equity and quality of services. Individual or collective beliefs and behaviors around a specific diagnosis resulting in any type of social discrimination and moral discredit prevent people from seeking care in a timely manner or even at all. Consequently, stigma has a negative impact on health outcomes aggravated by the mental health implications and social isolation that challenge public health initiatives targeting solutions for health concerns.(3) (4)

Worldwide, health care workers also suffer the negative actions that are the result of stigmatization, such as harassment and violent attacks inside and outside of their workplace compounded by the long working hours, psychological distress, fatigue, and occupational burnout that often is intrinsic to their jobs. Stigma and harassment resulting in bullying and violence against health care workers could constitute a human rights violation,(5) with clear impacts on the workers themselves, their social and work environments, and patients.(6) Many incidents of violence, harassment, or stigmatization have been reported against health care workers, patients, and medical infrastructure in relation to the COVID-19 pandemic; of these recorded incidents of violence and harassment, 67% of those events were directed at health care workers.(7) Some of these incidents include verbal and physical assault, such as patients who have deliberately coughed or spat on health care workers. These acts of violence have been shown to increase the levels of stress and, consequently, to exacerbate psychological sequelae resulting from moral injuries. People who have suffered discrimination and stigma are at elevated risk for mental illness, including anxiety, depression, PTSD, and suicidality.(8)

The global health emergency as a result of the COVID-19 pandemic has triggered a social crisis marked by discriminatory behaviors and stigma against people perceived as suspect, diagnosed, or have survived the virus. Ironically, despite their role in caring for people with COVID-19, health care workers are no exception to experiencing stigma.(9) During outbreaks of infectious diseases, frontline personnel are often stigmatized by people in their

1  
2 communities due to fear that they are sources of infection.(10) Studies report that while often  
3  
4 risking their own lives in exposing themselves to infection while delivering care, health care  
5  
6 workers also experience stigma such as the denial of services, housing, verbal abuse or  
7  
8 gossip, and social devaluation. Moreover, their family members face 'secondary' or  
9  
10 'associative' stigma.(11)

11  
12 During the COVID-19 pandemic, fear, panic, misinformation about how SARS-CoV-2 (the  
13  
14 virus that causes COVID-19) can spread, and misplaced anger are been described as some  
15  
16 of the reasons people attack and abuse health care personnel.(12) In the same context, in  
17  
18 Mexico the rapid increase of COVID-19 cases have led to a series of violence incidents  
19  
20 against health care workers accused of spreading the virus. Reports describe health care  
21  
22 workers being threatened, beaten, sprayed with bleach, and even evicted from their  
23  
24 homes.(13)

25  
26 While it is clear that health care workers experience bullying and stigma relating to COVID-19  
27  
28 around the world, little is known about how this risk in health care workers differs from others  
29  
30 in the community, especially controlling for other factors that may also be potentially  
31  
32 stigmatizing or lead to bullying incidents. We sought to examine bullying against health care  
33  
34 workers quantitatively to better identify the interaction of health care workers and bullying in  
35  
36 the context of other factors, but also qualitatively to help examine the lived experience of  
37  
38 bullying among health care workers around the world.

## 39 40 **MATERIALS AND METHODS**

### 41 42 43 **Study Design**

44  
45 We nested an analytical cross-sectional study within a larger mixed-methods effort assessing  
46  
47 COVID-19-related lived experience and impact around the world.(14) To evaluate the  
48  
49 associations of interest, we *a priori* included assessment of lived experience relating to  
50  
51 COVID-19-related bullying, harassment, hurt, and stigma, and also included assessment of  
52  
53 whether or not the respondent or someone in their household worked in a health care setting.  
54  
55 The cross-sectional design suited our needs for rapid deployment and large-scale distribution  
56  
57 around the world, reaching potential research participants through several social media  
58  
59 platforms.



1  
2  
3  
4 The parent study was guided by the Critical Medical Ecological model,(15) accounting for the  
5 sociocultural, biological, health care, abiotic data, and power dynamics across the domains of  
6 individuals, households, and communities in six world regions (Africa, Asia, Europe, Latin  
7 America and the Caribbean, Northern America, and Oceania).  
8  
9

10  
11  
12 We used the STROBE cross sectional checklist when writing this report(16) along with the  
13 Consolidated Criteria for Reporting Qualitative Research (COREQ)(17) guidelines.  
14  
15

### 16 17 **Setting**

18  
19 We implemented this study online and globally through the University of Rochester's  
20 installation of REDCap (v. 9.9.2, Vanderbilt University) in English, Spanish, French, and  
21 Italian, which reflected the primary languages found in the parts of the world where the most  
22 COVID-19 cases were emerging during the period of this study (April 6, 2020 to May 29,  
23 2020).(18) Data collection was stopped once we reached our sample size goals.  
24  
25  
26  
27  
28

### 29 **Sample Size**

30  
31 The *a priori* sample size for the parent study recruited participants from six geographic  
32 regions(19) (Africa, Asia, Europe, Northern America, Latin America and the Caribbean, and  
33 Oceania) based on the International Standard Organization (ISO) 3166 Country Codes(20) of  
34 participant residence. This estimation yielded 380 participants required per region, which we  
35 inflated by 50% (to 570), to account for multivariate analysis, missing data, and sub-analyses.  
36 For this particular nested analysis, we conducted a *post hoc* power computation and  
37 estimated that with a 99% two-sided confidence interval that our sample size exceeded 80%  
38 power to detect an effect size of at least 1.5 with normal approximation and continuity  
39 correction (JMP Pro 15.0.0 (SAS Institute Inc., Cary, NC)).  
40  
41  
42  
43  
44  
45  
46  
47

### 48 **Respondents**

49  
50 Participants were recruited through two social media platforms: 1) the Amazon Mechanical  
51 Turk ("mTURK") online workforce(21) and 2) through Facebook, Instagram, and the  
52 Facebook Audience Network.(22) Facebook's platforms are widely accessible globally and  
53 frequently are used survey research.(22) mTURK enables access to a multilingual digital  
54 workforce, providing the ability to recruit global research participants, including those without  
55  
56  
57  
58  
59

1  
2 Facebook platform access.(21) Inclusion criteria included self-identification as age 18 and  
3 older and able to complete the survey in English, Spanish, French, or Italian. Participants  
4 recruited through mTURK and Facebook were routed to the REDCap survey in the language  
5 of recruitment (English, Spanish, French, Italian), were presented with the RSRB-approved  
6 Information Sheet in that language, provided consent to continue, and were asked to confirm  
7 their age and country of residence. To accommodate their role as a digital workforce to reach  
8 harder-to-access populations, mTURK respondents were paid between \$1.00 to \$3.00 for  
9 participation.(23, 24) Facebook or Instagram respondents were not compensated. Additional  
10 recruitment details are available elsewhere.(25) In total, 7,411 individuals (40% recruited  
11 through mTURK, and 60% recruited from Facebook) represented 173 countries that were  
12 included in the final sample.  
13  
14  
15  
16  
17  
18  
19  
20  
21

## 22 **Measures**

23 This nested study included question formats around COVID-19-specific actions, perceptions,  
24 and experiences mostly derived from the Kaiser Family Foundation (KFF)'s Coronavirus  
25 Poll,(26) or that were constructed and tested by the project team for flow and  
26 understandability (see Supplementary Material for instruments in English, Spanish, French,  
27 and Italian). Personal experience with COVID-19 included testing, perception of infection,  
28 adherence to prevention strategies and recommendations (masking, social-physical  
29 distancing, working from home), and COVID-19-related morbidity or mortality in friends,  
30 family, or neighbors. Socio-demographic measures included age, gender, education,  
31 ownership of material assets (car and home), country of residence (mapped to region), and  
32 social media use. Household-related responsibilities included care for elderly and care for  
33 children, and health variables included the presence of a chronic health condition in the  
34 participant or in a household member.  
35  
36  
37  
38  
39  
40  
41  
42  
43  
44  
45

46 The primary exposure of interest was whether or not the participant worked in a health care  
47 setting, the focus of this analysis. We assessed this by asking the KFF Coronavirus Poll(26)  
48 question: *Do you or anyone in your household work in a health care delivery setting, such as*  
49 *a doctor's office, clinic, hospital, nursing home, or dentist's office?*  
50  
51  
52  
53  
54

## 55 **Outcome: COVID-19-related Harassment, Bullying, and Stigma**

1  
2 The primary outcome for this nested analysis was COVID-19-related harassment and  
3 bullying. To assess this phenomenon, we created and tested the following question: *Have*  
4 *you or a family member been harassed, bullied, or hurt because of coronavirus?* Response  
5 options to this question were “yes,” “no,” and “don’t know.” To identify specifically those who  
6 had perceived they or a family member were harassed, bullied, or hurt, we consolidated “no”  
7 and “don’t know” into one category, and “yes” into another. If the participant indicated that  
8 they or a family member had been harassed, bullied, or hurt because of coronavirus they  
9 were subsequently asked to explain their response (open-ended).  
10  
11  
12  
13  
14  
15

16  
17 Of secondary interest in our analysis is the ascertainment of participant perception of  
18 coronavirus stigma. We adapted two stigma questions from STRIVE(27) for this purpose: *Do*  
19 *people talk badly or gossip about other people who are living with, have had, or are thought*  
20 *to have coronavirus infection (or COVID-19)?* and *Do people who have had coronavirus*  
21 *infection (or COVID-19) lose respect or status in the community?* Participant responses to  
22 both questions were “Definitely Yes,” “Probably Yes,” “Probably Not,” “Definitely Not,” and  
23 “Don’t Know.” In analysis, these questions were reduced to two categories: “Definitely” or  
24 “Probably Yes” in one category, and the other options in another.  
25  
26  
27  
28  
29  
30  
31

32  
33 **Statistical Analysis.** All variables included in this study were cross-tabulated with the  
34 predictor variable of interest (Health care worker) and the primary outcome (COVID-19-  
35 related harassment or bullying). Numbers and percentages are used to display distribution  
36 and Pearson’s chi-square analyses and their associated p-values are used to compute and  
37 display significance.  
38  
39  
40  
41  
42

43 Logistic regression was used to compute Odds Ratios (OR) for COVID-19-related  
44 harassment or bullying by health care worker status, with the OR point estimate and 95%  
45 confidence interval (95% CI) conveying magnitude and certainty of the association. Following  
46 Hosmer and Lameshow’s approach,(28) variables marginally (or more) associated with both  
47 the predictor and outcome variables ( $p < 0.10$ ) were included in a multivariate logistic  
48 regression to assess potential confounding. Additionally, to address collinearity, only  
49 variables with a Variance Inflation Factor (VIF) value  $< .05$  were retained in the model.  
50 Variables not displaying linearity with the predictor and outcome variables were excluded  
51 from the multivariate analysis. The Hosmer and Lameshow Goodness-of-Fit statistic was  
52  
53  
54  
55  
56  
57  
58  
59

1  
2 used to assess the degree to which the data fit the final model. We used a forward stepwise  
3 conditional approach for assessing and including variables in the multivariate model, aiming  
4 to achieve a parsimonious, explanatory model. IBM SPSS Statistics (v25) was used for  
5 analysis. The significance level of all tests was set at 5%. Records missing data were  
6 excluded from bivariate and multivariate analyses.  
7  
8  
9

10  
11  
12 **Qualitative Coding and Analysis.** In total, 327 participant-level open-ended responses  
13 explaining COVID-19-related harassment and bullying situations and perspectives were  
14 coded by a team of coders. Responses were translated into English and coding was  
15 conducted in English. A review of qualitative responses generated an eleven-item codebook.  
16 Coders applied codes to all qualitative responses, discussing and resolving differences in  
17 code application. Descriptive analysis of qualitative codes is presented to denote magnitude  
18 of response to identify themes, and direct quotations from health care workers are presented  
19 to illustrate examples of those themes. Participant quotes are edited only occasionally when  
20 there are clear spelling, punctuation, or usage errors that impede understanding. Any  
21 potentially identifying or stigmatizing details, including country, are deleted or masked.  
22  
23  
24  
25  
26  
27  
28  
29  
30

31 **Ethical Review.** This study was performed in accordance with the ethical standards  
32 established by the 1964 Declaration of Helsinki and its later amendments. The University of  
33 Rochester's Research Subjects Review Board determined that this study met federal and  
34 University criteria for exemption (STUDY00004825). All participants provided informed  
35 consent to engage in this research after a review of a detailed Information Sheet presented in  
36 English, French, Spanish, or Italian at the beginning of the REDCap survey. Participants  
37 could skip any question in the survey except age and country of residence. All staff  
38 associated with this study completed CITIProgram's Research, Ethics, and Compliance  
39 Training.  
40  
41  
42  
43  
44  
45  
46  
47  
48

### 49 **Public Involvement**

50 The instrument for this study was pretested and subsequently edited with a non-random  
51 selection of public participants. Public comments were allowed on social media recruitment  
52 materials and advertisements about the topic, the study, and participation. Publications that  
53 result from this study will be disseminated back to the public via social media channels.  
54 Finally, we included an evaluation of the survey experience at the end of the REDCap  
55  
56  
57  
58  
59  
60

1  
2 encounter, which allowed participants to communicate their thoughts and experiences about  
3 answering the questions and participating in this work. Public input on the survey and  
4 experience were considered in shaping the results and interpretations from this project.  
5  
6  
7

## 8 **RESULTS**

9  
10 In total, 595 participants in this study (8.0% of the total sample size) indicated they or a family  
11 member experienced COVID-19-related harassment, bullying, or hurt, and 837 participants  
12 (11.3% of the total sample size) indicated they worked in a health care delivery setting, such  
13 as a doctor's office, clinic, hospital, nursing home, or dentist's office.  
14  
15  
16  
17

18  
19 Overall, shown in Table 1, people who worked in health care settings were significantly more  
20 likely to believe they have – or have had – coronavirus infection, or COVID-19 (OR: 2.7; 95%  
21 CI: 2.2, 3.3) than their counterparts who did not work in a health care setting. In fact, people  
22 who work in health care settings are also significantly more likely than others to have actually  
23 tested positive for COVID-19 (OR: 2.2; 95%CI: 1.4, 3.4). Participants receiving positive  
24 COVID-19 test results were significantly more likely to experience COVID-19-related bullying  
25 (OR: 4.8; 95% CI: 3.0, 7.7), as were participants generally who believed they had had  
26 COVID-19 previously (OR: 5.4; 95% CI: 4.4, 6.6).  
27  
28  
29  
30  
31  
32  
33

34  
35 Health care workers were less likely to follow social-physical distancing compared with  
36 participants who were not health care workers (OR: 0.7; 95% CI: 0.6, 0.9), and were less  
37 likely to be able to do their jobs from home (OR: 0.4; 95% CI: 0.4, 0.5). Both of these factors  
38 were related similarly to COVID-19-related bullying: people less likely to follow social-physical  
39 distancing closely (OR: 1.8; 95% CI: 1.4, 2.3) and those who could not do their jobs from  
40 home (OR: 1.3; 95% CI: 1.1, 1.5) were more likely to experience bullying than were other  
41 participants.  
42  
43  
44  
45  
46  
47

48  
49 While there were no significant differences between age and gender distribution between  
50 health care workers and other workers, health care workers were more likely to have  
51 education beyond high school (OR:1.9; 95%: 1.4, 2.4). Education level (years of education  
52 completed) was not associated with COVID-19-related harassment and bullying in either  
53 health care workers or non-health care workers (p=0.103, p=0.312, respectively; data not  
54 shown). Age was not related to experiencing COVID-19-related harassment or bullying.  
55  
56  
57  
58  
59  
60

1  
2 Participants identifying as a gender other than male or female were more likely to experience  
3 COVID-19 bullying (OR: 5.7; 95% CI: 5.7; 95% CI: 2.9, 11.6).  
4  
5

6  
7 Health care workers were more likely to procure and wear a mask than non-health care  
8 workers (OR: 1.3; 95% CI: 1.1, 1.5); mask-wearers were protected, however, from COVID-19-  
9 related harassment and bullying (OR: 0.7; 95% CI: 0.6, 0.8). Health care workers were  
10 significantly more likely to know a family member, friend, or neighbor who has had COVID-19  
11 (OR: 2.8; 95% CI: 2.4, 3.2) and to know someone who has died from COVID-19 (OR: 4.0;  
12 95% CI: 3.4, 4.8). Having a family member, friend, or neighbor die from COVID-19 was also a  
13 risk factor for COVID-19-related harassment and bullying (OR: 4.1; 95% CI: 3.3, 5.0), as was  
14 knowing someone who had had COVID-19 (OR: 2.5; 95% CI: 2.1, 3.0).  
15  
16  
17  
18  
19  
20  
21

22  
23 Health care workers were more likely to use social media daily than other workers (OR: 1.3;  
24 95% CI: 1.1, 1.5). However, people who used social media daily were significantly less likely  
25 to experience COVID-19-related bullying (OR: 0.6; 95% CI: 0.5, 0.7).  
26  
27  
28

29  
30 Asia (16.0%), Africa (13.6%), Northern America (12.1%), and Latin America and the  
31 Caribbean (11.4%) had the highest proportions of health care workers that participated in our  
32 study, while Europe (6.2%) and Oceania (6.9%) had the lowest. East Africa (16.7%), South  
33 Asia (17.0%), and the Caribbean (14.7%) were subregions with the highest proportion of  
34 health care workers. Participants in Africa, Asia, Northern America, and Oceania as a cluster  
35 of higher-prevalence regions were significantly more likely to experience COVID-19-related  
36 bullying than were Latin America and Europe as a cluster of lower-prevalence regions (OR:  
37 1.9; 95% CI: 1.6, 2.3). Sub-Saharan Africa (14.0%), Southern Asia (10.7%), and Northern  
38 America (10.6%) had the highest rates of participant experiences of COVID-19-related  
39 bullying.  
40  
41  
42  
43  
44  
45  
46

47  
48 Health care workers were significantly more likely to have a chronic illness than were non-  
49 health care workers (OR: 2.0; 95% CI: 1.7, 2.4), and also are more likely to have someone in  
50 their household with a chronic disease (OR: 1.5; 95% CI: 1.3, 1.8). Those with chronic  
51 illnesses themselves (OR: 1.9 ; 95% CI: 1.6, 2.3) were more likely to experience COVID-19-  
52 related bullying.  
53  
54  
55  
56  
57  
58  
59  
60

1  
2 Health care workers were more likely to have child care responsibilities (OR: 1.8; 95% CI:  
3 1.6, 2.1) and elder care responsibilities (OR: 2.6; 95% CI: 2.2, 3.0) than were non-health care  
4 workers. Both groups – those with child care responsibilities and those with elder care  
5 responsibilities – were at greater risk for COVID-19-related bullying (OR: 1.9; 95% CI: 1.6,  
6 2.2 and OR: 2.2; 95% CI: 1.9, 2.7, respectively).  
7  
8  
9  
10

11  
12 Health care workers were more likely to have access to material assets, being more likely to  
13 own both a car (OR: 1.5; 95% CI: 1.3, 1.8) and a home (OR: 1.4; 95% CI: 1.2, 1.6) than were  
14 non-health care workers. Neither car ownership nor home ownership, however, was related  
15 to COVID-19-related bullying.  
16  
17  
18  
19

### 20 21 Stigma

22 Overall, 27.3% of participants believed that people talk badly or gossip about other people  
23 who are living with, have had, or are thought to have COVID-19, and 21.9% of participants  
24 believed people who have had COVID-19 lose respect or status in the community.  
25  
26

27 Perceptions of COVID-19 stigma varied considerably around the world: participants from Asia  
28 (39.2%), Africa (37.8%), and Latin America and the Caribbean (33.6%) were more likely to  
29 believe that people talk badly or gossip about other people who are living with, have had, or  
30 are thought to have COVID-19 than did participants in Europe (21.7%), Northern America  
31 (16.5%), and Oceania (16.0%). Similarly, participants from Asia (34.1%), Africa (29.6%), and  
32 Latin America and the Caribbean (29.0%) were more likely to note that people who have had  
33 COVID-19 lose respect or status in the community than did participants in Europe (11.9%),  
34 Northern America (14.8%), and Oceania (11.9%).  
35  
36  
37  
38  
39  
40  
41  
42

43 Health care workers were more likely to believe that people talk badly or gossip about other  
44 people who are living with, have had, or are thought to have COVID-19 (OR: 2.2; 95% CI:  
45 1.9, 2.6) and that people who have had COVID-19 lose respect or status in the community  
46 (OR: 2.3; 95% CI: 2.0, 2.7). People who hold such beliefs are more likely to have  
47 experienced COVID-19-related harassment or bullying: those believing that people with  
48 COVID-19 are talked badly or gossiped about were significantly more likely to have  
49 experienced COVID-19-related bullying (OR: 2.7; 95% CI: 2.3, 3.2), as do people who feel  
50 others with COVID-19 lost respect or status in the community (OR: 3.5; 95% CI: 2.9, 4.2).  
51 People who believe they have had COVID-19 infection themselves, know someone who's  
52  
53  
54  
55  
56  
57  
58  
59

1  
2 had COVID-19, or knows someone who's died from COVID-19 are all significantly more likely  
3  
4 to believe people are talked badly about or gossiped or that they lose status and respect in  
5  
6 the community (data not shown).  
7

### 8 9 Multivariate Model

10 Shown in Table 2, people who work in health care settings are significantly more likely to  
11  
12 experience COVID-19-related harassment, bullying, or hurt (OR: 2.9; 95% CI: 2.3, 3.5), even  
13  
14 after controlling for the confounding effects of not being able to work from home, having had  
15  
16 COVID-19 themselves, not having closely followed social-physical distancing, having a family  
17  
18 member, friend, or neighbor with or die from COVID-19, having at least one chronic disease,  
19  
20 having child and elder care responsibilities, and residing in Africa/ Asia/ Northern America/  
21  
22 Oceania (aOR: 1.5; 95% CI: 1.2, 2.0). Finally, the lack of significance in the Hosmer and  
23  
24 Lameshow Goodness-of-Fit statistic indicates the data fits the model well ( $p=0.990$ ; data not  
25  
26 shown).  
27

### 28 Qualitative

29 The code most commonly applied to qualitative excerpts describing harassing/ bullying/  
30  
31 hurtful experiences related to COVID-19 was "Happened in/ related to community," noted by  
32  
33 109 participants (Table 3). This broad code encompasses a range of types of experiences.  
34  
35 For instance, some community-related bullying commonly applies to people who are  
36  
37 suspected of having COVID-19, perhaps through experiencing one of COVID-19's symptoms:  
38

39 *One relative had fever and villagers thought it was for coronavirus. They wanted to*  
40 *lock the house and hand over [her] to police. Later on the matter was solved. People*  
41 *are being harsh to a suspected COVID-19 patient. (Participant from South Asia)*  
42  
43

44 *I have COPD and allergies. People would get very mean if I coughed or sniffled. That*  
45 *is one of the major reasons I'm home. (Male participant, 60s, from North America)*  
46  
47

48 *Coughed while using public transportation. Was almost put out...* (Female participant,  
49  
50 40s, from the Caribbean)

51 *Si estornudas aunque tengas la mascarilla y te tapes con el antebrazo la gente te*  
52 *habla y te mira mal. (If you sneeze even if you have the mask and cover yourself with*  
53 *your forearm, people talk to you and look at you badly.) (Female participant in her 20s,*  
54  
55 from the Caribbean)  
56  
57  
58  
59



1  
2 *My grandchild was outside with his father walking around the building, just to get a*  
3 *fresh air, no one was around. the [ ] premises have a locked fence usually. and some*  
4 *"good neighbours called the police and they came, didn't get fined though, but got*  
5 *warning. It is so much for solidarity... (Southwestern Europe, Female participant, 60s)*  
6

7  
8 Often, community-related COVID-19-related bullying/ experiences relate to an individual's  
9 perception of support (or lack thereof) regarding adherence to (or not) of prevention  
10 strategies:  
11

12  
13  
14 *Too many science illiterate people criticizing and mocking scientists because they do*  
15 *not understand the job that we do, and would rather believe in conspiracy theories.*  
16 *(Male participant, in his 20s, from the Caribbean)*  
17

18  
19 *The [people] criticizing the government approach openly, both scientists, medical*  
20 *professionals, and ordinary people, have been ostracized here up until now. Many lose*  
21 *friends and are accused almost of "treason" when we care about the lives of our fellow*  
22 *citizens. (Female participant, in her 50s, Scandanavia)*  
23

24  
25 *Subject to verbal abuse for leaving home. Public hysteria is such that many now*  
26 *labour under the misguided notion that stepping outside will lead to certain death. The*  
27 *media have exacerbated this and the government have done nothing to curb it.*  
28 *(Female participant, in her 50s, Northern Europe)*  
29

30  
31 *Claro al no tener miedo no sigo las recomendaciones y eso molesta a algunos (Of*  
32 *course, not being afraid, I do not follow the recommendations and that annoys some)*  
33 *(Male participant, in his 40s, Central America)*  
34

35  
36 *Aggressed by people screaming "Stay at home" when you just do some jogging on*  
37 *your own, people calling the police because a child is outside playing alone in a*  
38 *condominium space. (Male participant, 70s, Southern Europe)*  
39

40 One environment that emerges as a common site of COVID-19-related harassment/ bullying  
41 is the supermarket or other types of stores. Participants commonly note that encounters in  
42 the store environment can become contentious:  
43

44  
45  
46 *The staff at the grocery store told me that my ADA covered disability, "does not matter"*  
47 *because of COVID-19. I reported them. (Female participant, 60s, North America)*  
48

49  
50 *My mother was told off for driving to the supermarket so I could put groceries in her*  
51 *boot. This was by a neighbor... (Female participant, 50s, Oceania)*  
52

53  
54 *Grocery shopper thought I wasn't using proper social distancing. (Male participant, 50s*  
55 *Northern America)*

56  
57 *Was pushed in a Dollar General store over toilet paper... (Female participant, 50s,*  
58 *Northern America)*  
59

1  
2  
3 *I have witnessed people in the grocery store totally loose it when another person got*  
4 *too close. (Male participant, 70s, Northern America)*  
5

6  
7 *Some animal coughed over my wife. Store security arrested him and the police took*  
8 *the mongrel away. My wife has had to be tested each day for a week to ensure she*  
9 *had not contracted the virus. Happily, she did not test positive... (Male participant, 60s,*  
10 *Oceania)*  
11

12 *I went to a secondary supermarket in my town and was harassed by the shop guard;*  
13 *he felt that it was only appropriate for one person in a household to do the weekly*  
14 *shopping. I pay for my food, and my roommate pays for hers. Since we were at the*  
15 *store together, he felt that he would mess with us. (Male participant, 40s, Northern*  
16 *Europe)*  
17  
18

19 *Because I became a Person under Monitoring (a suspect case), neighbors were*  
20 *unwilling to talk to me in person. When I got to the convenience store, people would*  
21 *literally flee, or keep their distance. (Woman participant, Southeast Asia, 50s)*  
22  
23

24 The second most commonly mentioned COVID-19-related harassment or bullying scenario  
25 participants note involves police, authorities, or government officials. As with the “Community”  
26 sources of bullying, these sources relate to specific incidents experienced by participants but  
27 also perceptions from implementation of prevention policies.  
28  
29  
30

31  
32 *En [country] el gobierno prohíbe - el uso de mascarillas en lugares públicos. (In*  
33 *[country], the government prohibited the use of masks in public places.) (Male*  
34 *participant, 50s, Central America)*  
35

36 *The police harassed me when I was coming from the hospital at curfew hours. (40s*  
37 *male, Sub-Saharan Africa)*  
38

39  
40 *The cops scold us if they see us walking on the roads with face masks (South Asia,*  
41 *50s, male)*  
42

43 *I had to go to buy products, but police arrested my car, and sent me home. (Central*  
44 *Asian participant)*  
45

46  
47 *By the government, forbidding something as simple as going to the park while still*  
48 *allowing people to use public transport. (male, 30s, Central Europe)*  
49

50 *Bullied by politicians. Cat go to park with kids and play tennis. Only one person should*  
51 *go shopping. Being under house arrest wile criminals are set free. (North American*  
52 *woman, 50s)*  
53

54  
55 *Mon cousin a été maltraité par la police parce qu'il s'est retrouvé dehors après le*  
56 *couvre-feu. (My cousin was mistreated by the police because he ended up outside*  
57 *after curfew) (Female participant, late teens, Sub-Saharan Africa)*  
58  
59

1  
2  
3 One additional form of community-related COVID-19 harassment and bullying is through  
4 racist or other discriminatory actions, for instance:  
5  
6  
7

8 *Seen a lot of racist graffiti around my city towards Asians. Also heard [racist slur] a few*  
9 *times.* (Male participant from East Asia living in Northern America, in his 30s)  
10

11 *My nephew who is in fifth grade was bullied because of his nationality...* (Female  
12 participant in her 30s, from North America)  
13

14 *My grandparents are Asian and Chinese, all the news stories hurt them because so*  
15 *many racist things are happening to Asians right now...* (Female participant, in her  
16 early 20s, from Northern America)  
17  
18

19 *Soy asiática y al principio (Febrero y antes) la gente me trataba mal por la calle y me*  
20 *evitaba.* (I am Asian and at the beginning (February and before) people treated me  
21 badly on the street and avoided me) (30s female, living in Southwestern Europe, from  
22 Southeastern Asia)  
23  
24

25 *As I belong to a particular religion, the people near my home keep on bullying us for*  
26 *the coronavirus, which is not fair.* (Moslem participant in South Asia, male, 20s)  
27  
28

29 Violence – both verbal and physical – was the third most commonly mentioned COVID-19-  
30 related bullying or harassment scenario, frequently linked to other coded thematic elements  
31 (such as the police, or racism).  
32  
33

34 *I am of part Asian descent and have been bullied, harassed, spit on, blocked from*  
35 *getting goods, and told I am responsible for the "Chinese Virus" even though I am not*  
36 *from China and my Parents and Grandparents and Great Grandparents were all from*  
37 *[Northern America].* (male participant in his 50s, Northern America)  
38  
39

40 *The security agencies have been a pain, even hurting people for not beating the*  
41 *curfew...* (male participant, in his 40s, East Africa)  
42  
43

44 *Chronically ill or folks with cancer being verbally abused by folks for wearing a mask*  
45 *(before the masks for everyone recommendation hit a few days ago)...* (participant in  
46 their 30s, Northern America)  
47

48 *Told in shop to f\*\*\* off out of my space by someone. People are on short fuse and*  
49 *very nasty...* (participant from Northern Europe)  
50  
51

52 People commonly report health care environments and personnel as important contextual  
53 elements of COVID-19-related harassing and bullying situations, for example:  
54  
55  
56  
57  
58  
59

1  
2 *Mi cuñada cometió el error de salir a la calle con ropa quirúrgica (no es ni médico ni*  
3 *enfermera pero trabaja en un hospital...) y la gente la agredió en la calle (sólo*  
4 *insultos, pero si tuvo miedo) (My sister-in-law made the mistake of going out in the*  
5 *street wearing surgical clothes (she is neither a doctor nor a nurse but works in a*  
6 *hospital...) and people attacked her on the street (only insults, but he was afraid)*  
7 *(Central America, female participant, 30s)*  
8

9  
10 *Mi sobrina que es Médica, la hostigan en su domicilio los vecinos diciéndole que se*  
11 *vaya de allí... (My niece, who is a doctor, is harassed at her home by the neighbors*  
12 *telling her to get out of there ...) (South American participant)*  
13

14 *Mi hijo es médico y me lo han ofendido en la calle acusándolo de traer el virus (My*  
15 *son is a doctor and they have insulted me on the street accusing him of bringing the*  
16 *virus) (Male participant, 50s Central America)*  
17

18  
19 *Mis familiares se dedican al sector salud, y sufrieron de hostigamiento por solicitar*  
20 *insumos de trabajo (My relatives are engaged in the health sector, and they suffered*  
21 *harassment for requesting labor supplies) (Male participant, 50s, Central America)*  
22

23  
24 Health care workers commonly note that their personal experiences of COVID-19-related  
25 harassment and bullying involve their professional identities and the visible manifestations of  
26 those identities to the public:  
27

28  
29  
30 *Yes I have had some verbally abuse me on social media including a friend who called*  
31 *me something very unpleasant because I was having a very emotionally difficult*  
32 *weekend (50s, female participant, Northern Europe)*  
33

34  
35 *Unable to enter a supermarket because of being a nurse (Southeast Asia, Male*  
36 *participant, 30s)*  
37

38 *There have been isolated reports from some parts of the country that doctors have*  
39 *been harassed and asked to leave their apartment buildings (30s, Female participant,*  
40 *South Asia)*  
41

42  
43 *I've been ridiculed for trying to enforce physical distancing at my place of work. I've*  
44 *been purposely sneezed on at very close distance. There have been many rude and*  
45 *impatient customers that have been difficult to deal with. (50s, Female participant,*  
46 *Northern America)*  
47

48 *Salir con uniforme médico es complicado, la gente es muy ignorante y nos agrede*  
49 *(Going out with a medical uniform is complicated, people are very ignorant and attack*  
50 *us) (Central America, 40s, Female participant)*  
51

52  
53 *Pacientes exigen que se les atienda en servicios de emergencias en casos no*  
54 *urgentes (Patients demand that they be treated in emergency services in non-urgent*  
55 *cases) (South America participant)*  
56

1  
2 Though less common, some participants report that medical personnel or institutions  
3 perpetrated COVID-19-related harassing or bullying situations:  
4

5  
6 *It was Doctors bullying the public when they should have had the courage to confront*  
7 *the Hospital CEO's and demand masks and PPE equipment be provided. I felt like*  
8 *saying "you stay home so I can go out" besides if the infection control measures were*  
9 *correct then if I wore gloves and keep a TWO or THREE meter physical distance then*  
10 *no Doctor will come to harm. It was unfounded, hysterical, unethical cheap marketing*  
11 *ploy at best and an undeserved guilt trip on the public at worst. I think Doctors and*  
12 *Nurses asked over the top, unreasonable, and unjustifiable restrictions on the public,*  
13 *i.e. to stay at home regardless of the cost. (Male participant, Oceania, 60s)*  
14  
15

## 16 17 18 **DISCUSSION**

19  
20  
21 We have demonstrated that health care workers around the world are statistically significantly  
22 more likely to experience COVID-19-related harassment, bullying, and hurt than others, even  
23 after controlling for a range of confounding factors. Historically, infectious diseases have  
24 faced the most powerful stigma among public health concerns. Furthermore, potentially  
25 deadly conditions, new diseases, and illnesses without a known treatment or cure are other  
26 factors associated with an increased risk of experiencing stigmatization.(8)  
27  
28  
29  
30  
31

32  
33 The lived experience of COVID-19-related bullying among our participants relates frequently  
34 to their public identities as health care workers visible in and traversing through the  
35 community, frequently intersecting with other domains such as police, racism, and violence.  
36 There has been sharp increase in public sentiments of stereotyping and stigmatization of  
37 racial minorities due to COVID-19, especially towards Asian people worldwide.(29, 30) Racist  
38 and xenophobic rhetoric has spread along with the COVID-19 pandemic and is detrimental to  
39 the community's health, creating an atmosphere of fear and lack of safety. Perhaps as a  
40 consequence of this bullying and harassment, health care workers also are significantly more  
41 likely to feel that people with COVID-19 are gossiped about and lose status in the community.  
42 Interestingly, level of education – while higher in health care workers compared with others –  
43 was not associated with COVID-19-related bullying, suggesting that there was little difference  
44 in bullying experience among health workers in different roles. Similarly, while health care  
45 workers had significantly greater access to material assets (e.g., car, home), these assets  
46 were not related to reduced experience of bullying.  
47  
48  
49  
50  
51  
52  
53  
54  
55  
56  
57  
58  
59  
60

1  
2  
3  
4 Health care workers, perhaps unsurprisingly, are substantially immersed in direct COVID-19  
5 experience: they are more likely to test positive for COVID-19 than others, more likely to feel  
6 they have had COVID-19 infection, and more likely to have known family, friends, or  
7 neighbors that became sick with COVID-19 or to know people who have died from it. These  
8 experiences are strongly related to COVID-19-related harassment and bullying and may, in  
9 part, account for the higher prevalence of COVID-19-related stigma beliefs among health  
10 care workers.  
11  
12  
13  
14  
15

16  
17 As we observed, much of the exposure health care workers experience relates to their jobs;  
18 they are less likely to be able to do their jobs from home and are less likely to adhere to  
19 social-physical distancing, both of which place them at excess risk of experiencing COVID-  
20 19-related bullying by placing them in public and often in crowded situations. These situations  
21 are countered, perhaps, in that health care workers are significantly more likely to wear  
22 masks than others and wearing a mask is protective against COVID-19-related harassment  
23 and bullying. Health care workers commonly note that bullying they experience occurs in the  
24 context of public situations (e.g., in stores, and in their housing situations) while en route to  
25 and from their jobs, and through encounters with police that exceed curfews because of work  
26 hours.  
27  
28  
29  
30  
31  
32  
33  
34  
35

36 In an online study of 3,551 non-health care workers in the United States and Canada, high  
37 percentage of Canadians and Americans believed that health care workers should not be  
38 allowed to go out in public, should have restrictions on their freedoms, should be isolated  
39 from community, and should be separated from their families.<sup>(10)</sup> Little has been done  
40 politically to recommend that health care workers be protected for carrying out their  
41 duties.<sup>(10)</sup> The absence of protections – and indeed that bullying often arises from authorities  
42 - creates anxiety for health workers in that they subsequently confront bullying and  
43 stigmatizing situations alone.  
44  
45  
46  
47  
48  
49  
50

51  
52 In part, stigma could be an expected consequence from the pandemic and from the resulting  
53 preventive strategies. Primary prevention of infection aims to reduce exposure to susceptible  
54 individuals as a source of infection. Due to their occupational exposure, health care workers  
55 are often viewed in the community as a potential source of the very infection that the  
56  
57  
58  
59

1  
2 community is trying to prevent.(10, 13) The resulting stigma associated with COVID-19,  
3  
4 however, threatens the physical and mental health of health care workers.(9) A study  
5  
6 including 906 health care workers from 5 major hospitals in Singapore and India reported a  
7  
8 significant association between the prevalence of physical manifestation and psychological  
9  
10 outcomes among health care workers during the COVID-19 outbreak. Results from the study  
11  
12 identify headaches as the most common symptom and highlight a significant association  
13  
14 between depression, anxiety, stress, and PTSD with the presence of physical symptoms.(31)

15  
16 We found that health care workers are significantly more likely to have child and elder care  
17  
18 responsibilities, roles that are statistically significantly associated with greater COVID-19-  
19  
20 related bullying. Health care workers are also more likely to be medically vulnerable  
21  
22 themselves, being significantly more likely to have a chronic health condition and to live with  
23  
24 someone in their household who has a chronic health condition. Social media usage is more  
25  
26 common among health care workers and is generally protective against COVID-19-related  
27  
28 bullying; that said, some participants report social media as the vehicle through which  
29  
30 bullying occurs.

31  
32 We found that about 13% of descriptions of harassing and bullying events were violent, either  
33  
34 verbally or physically, the third most common code applied. Creating violence in workplaces  
35  
36 leads to fear, worry, and suffering of the health care workers' own mental and physical  
37  
38 health.(32) In the early phase of the pandemic, a qualitative study by Liu and colleagues  
39  
40 showed that the health care workers had strong sense of responsibility and teamwork while  
41  
42 facing immense pressure of heavy workloads, lack of protective gear, and feelings of  
43  
44 powerlessness with patients.(33) Over time, however, health worker's physical and  
45  
46 psychological well-being is undermined by the constant pressures of discrimination,  
47  
48 stigmatization, social isolation, and burnout which will be detrimental for controlling the  
49  
50 spread of COVID-19.(34)

51  
52 Prevalence of health care workers, COVID-19-related bullying and harassment, and COVID-  
53  
54 19-related stigma beliefs all varied significantly by region of the world. As a cluster, residents  
55  
56 in Africa, Asia, Northern America, and Oceania were more likely to experience bullying than  
57  
58 their counterparts in Latin America and Europe. Residents of Asia, Africa, and Latin America  
59  
60

1  
2 were also more likely to believe COVID-19 was a stigmatizing condition, resulting in gossip  
3 and lower social status.  
4

5  
6  
7 A study conducted among 3551 adult non-health care workers (1716 from the U.S., and 1835  
8 from Canada) measured indicators of stigmatization, COVID Stress Syndrome, and  
9 avoidance affecting health care workers. Their findings suggest that the tendency to  
10 stigmatize health care workers is associated with the COVID Stress Syndrome that consists  
11 of fear that COVID-19 is highly dangerous, combined with the fear of being exposed to  
12 potentially contaminated surfaces or objects, fear about socio-economic impact of COVID-19,  
13 and fear that foreigners are the source of infection.(35) These factors appear related in our  
14 study as well, with a mix of harassing experiences relating to perceptions of both over- and  
15 under-caution, most commonly illustrated by masking in public places. Further, incidents of  
16 racist harassment relate to perceptions of SARS-CoV-2's origins and fear of people  
17 perceived as "foreign." At least one previous study shows that the severity of the COVID-19  
18 pandemic is associated with the tendency to overestimate health risks in general.(10, 35)  
19 COVID-related stigma around health care workers could be part of a wider tendency to  
20 overestimate health threats and to exaggerate perceptions.(10)  
21  
22  
23  
24  
25  
26  
27  
28  
29  
30  
31  
32

33 The global nature of COVID-19-related harassment and bullying study is further endorsed in  
34 numerous studies. Frontline health workers recovering from COVID-19 in Lagos State,  
35 Nigeria reported feeling stigmatized and psychologically and morally traumatized. When  
36 informed of their positive COVID-19 status the majority of the respondents (who were  
37 knowledgeable on COVID-19), however, reacted with denial, anxiety, distress, disorientation,  
38 crying for fear of stigmatization. Some of the challenges post-diagnosis include loneliness,  
39 worries about the state of their families, nondisclosure of status to family members, isolation  
40 centers with limited space, insomnia and, paradoxically, stigmatization by other health  
41 workers at the isolation center.(3) In Mexico, nurses were denied public transport and  
42 physically assaulted.(13) In India, doctors were asked to vacate from their homes and  
43 attacked while carrying out their duties, believing them to be a source of infection that spread  
44 in housing complexes.(36) Even children of doctors, ambulance drivers, family members of  
45 COVID-19 patients, and discharged patients are shunned by the community. In the  
46 Philippines, a nurse was attacked by men pouring bleach on his face.(37) Many nurses are  
47  
48  
49  
50  
51  
52  
53  
54  
55  
56  
57  
58  
59  
60



1  
2 afraid to wear their uniforms outside of the health care settings, fearing for the safety of their  
3  
4 own lives.(38)

5  
6  
7 Finally, media coverage could introduce fear and anxiety into people's psychological  
8  
9 schemes of the "unknown."(39) Selective reporting by the media about COVID-19 could drive  
10  
11 fear and panic about being infected with the disease, leading to social stigma and  
12  
13 discrimination of vulnerable populations. Health care workers are being shunned because  
14  
15 people fear being infected by them.(40) While media can have a positive effect by portraying  
16  
17 health care workers as "heroes," the negative psychological burden on the health care  
18  
19 workers themselves can be enormous and exhausting.(41) Distrust and panic towards health  
20  
21 care workers potentially carrying COVID-19 further ostracize and oppress the very people  
22  
23 who have the responsibility and training to care for sick COVID-19 patients. Interestingly, in  
24  
25 our study, however, use of *social* media – which was significantly higher among health care  
26  
27 workers – appears protective against bullying; people who used social media daily in our  
28  
29 study were more than 1/3<sup>rd</sup> less likely to experience bullying. The potentially positive impact  
30  
31 of social media use on COVID-19-related experience has been also found in other  
32  
33 studies.(42) This finding reinforces that most bullying and stigma experienced by health care  
34  
35 workers occurs in the context of their daily lives in their communities, workplaces, and  
36  
37 traveling between the two.

### 38 **Strengths and Limitations**

39 Our study is limited by our use of a single question to measure bullying and harassing  
40  
41 experiences, where other studies of similar topics use more nuanced sets of measures. We  
42  
43 also do not collect the participants' roles within the health settings where they work, which  
44  
45 would perhaps distinguish the experiences of different job levels. Our use of social media  
46  
47 also restricts the generalization of our findings, in particular in that countries without access to  
48  
49 Facebook and mTURK (e.g., the People's Republic of China) are not represented. Also,  
50  
51 people recruited through social media mechanisms may differ from others in the community  
52  
53 with respect to literacy, technological access, and resources. Further, we have chosen to  
54  
55 report UN regional and sub-regional aggregations of countries in our analyses rather than  
56  
57 countries themselves to avoid stigmatization based on our results. Our study, however, has  
58  
59 several strengths, namely a large global sample size, four languages that cover much of the  
60  
pandemic's reach at the time of data collection, a mixed methods design, and a robust

1  
2 guiding model of Critical Medical Ecology which helps contextualize concepts, roles, and  
3 levels of impact.  
4  
5

## 6 7 **Recommendations**

8  
9 In summary, health care workers are placed in closer contact with COVID-19 and the people  
10 infected by it. These workers are often vulnerable themselves (less job flexibility, more family  
11 responsibilities, greater medical risk) and even after controlling for a range of social and  
12 contextual variables, health care workers remain at considerable elevated risk of  
13 experiencing COVID-19-related stigma and bullying. In addition to impacting their own lives,  
14 stigma and bullying against health care workers impacts – even destabilizes – their families,  
15 neighborhoods, and patients. Addressing this issue requires understanding and addressing  
16 why people harass and stigmatize health care workers, and should aim to de-stigmatize  
17 health workers through open dialogue and discussion among stakeholders in their  
18 communities.(43) The United Nations has determined that violence against health care  
19 workers is a human rights violation and any acts of violence against health care workers  
20 discharging their duties should be condemned.(5) In the midst of a pandemic, making work  
21 environments safe and implementing measures to protect health care workers, their patients,  
22 and communities should be visioned as primary and essential prevention of COVID-19 itself,  
23 stress and mental health exacerbation at the individual and community levels, and  
24 interpersonal violence.  
25  
26  
27  
28  
29  
30  
31  
32  
33  
34  
35  
36  
37

38 Studies have shown that during public health emergencies, when immediate and reliable  
39 information is required, there are consistently, subgroups of people that are at greater risk of  
40 experiencing stigmatization, discrimination, and harassment; hence, will need special  
41 attention and protection.(44, 45) Efforts to reduce stigmatization, bullying, and harassment  
42 associated with COVID-19 cannot be isolated; actions should be the result of proactive  
43 collaboration between leaders from diverse sectors of our societies, including but not limited  
44 to governments, health organizations, religious leaders, and public figures, such as athletes,  
45 communicators, and social influencers.  
46  
47  
48  
49  
50  
51  
52

53 Strategies for reducing health care worker risk of COVID-19-related bullying should include  
54 promotion of reliable and official sources of information, such as social media and other  
55 communication methods since misinformation can increase the levels of stress. Moreover,  
56  
57  
58  
59

1  
2 the message must be clear and oriented to increasing awareness while not promoting fear.  
3  
4 Communities should be supported to identify and mitigate negative behaviors in order to  
5 support stigmatized groups. Lastly, groups at risk of experiencing stigmatization and bullying,  
6  
7 such as health care workers, should first count on support and effective measures of  
8  
9 protection in and out of their workplaces and communities.(43) Furthermore, health care  
10  
11 workers at risk of or who have experienced any type of offence must be provided with  
12  
13 psychological support to overcome the different forms of aggression.  
14  
15  
16  
17  
18  
19  
20  
21  
22

## 23 **ACKNOWLEDGEMENTS**

25 We are grateful for the assistance of Connor DeAndrea-Lazarus, Kathleen Buckwell, Cody  
26 Gardner, and Carrie Dykes for logistical assistance with developing, reviewing, and  
27 implementing aspects of this project. We also acknowledge the contributions of Wyattte Hall,  
28 Carrie Irvine, Dongmei Li, Erin Muir, José G. Pérez Ramos, Sophia Wiltse, and Rebecca  
29 Royzer to the parent project of which this effort was a part.  
30  
31  
32

## 33 **Author Statement**

35 TD directed the design, implementation, and analysis of this study, and led the development  
36 of this manuscript. LA conducted background research and contributed to writing this  
37 manuscript. SS contributed to this study's design, conducted background research, and  
38 contributed to writing this manuscript. MB and SS contributed to this study's design, reviewed  
39 and coded qualitative data, and reviewed and edited drafts. TP reviewed and edited drafts  
40 and participated in the design of the study. EP contributed to the design of this study and  
41 reviewed the final manuscript. All co-authors reviewed and approved the final manuscript.  
42  
43  
44

## 45 **Conflict of Interest Statement**

47 The authors report no financial or other conflicts of interest with the content of this study.  
48 During the period of this study, Dr. Dye was the Principal Investigator on unrelated grants and  
49 contracts from the US National Institutes of Health, Pfizer Global Medical Grants, and the  
50 New York State AIDS Institute.  
51  
52

## 53 **Data Statement**

1  
2 Given the identifying and potentially stigmatizing nature of the data in this study, analyses are  
3 provided in this paper to support its conclusions though datasets are not publicly available.  
4 Interested investigators can request data from the Corresponding Author.  
5

## 6 7 REFERENCES

- 8  
9 1. Link B, Hatzenbuehler ML. Stigma as an unrecognized determinant of population health:  
10 Research and policy implications. *Journal of Health Politics, Policy and Law*. 2016;41(4):653-73.
- 11 2. Link BG, Phelan JC. Conceptualizing stigma. *Annual review of Sociology*. 2001;27(1):363-85.
- 12 3. Kwaghe AV, Ilesanmi OS, Amede PO, Okediran JO, Utulu R, Balogun MS. Stigmatization,  
13 psychological and emotional trauma among frontline health care workers treated for COVID-19 in  
14 Lagos State, Nigeria: A qualitative study. 2020.
- 15 4. Sauer KS, Jungmann SM, Witthöft M. Emotional and behavioral consequences of the COVID-  
16 19 pandemic: The role of health anxiety, intolerance of uncertainty, and distress (in) tolerance.  
17 *International journal of environmental research and public health*. 2020;17(19):7241.
- 18 5. Council US. Resolution 2286 (2016). United Nations Security Council. 2016.
- 19 6. Safeguarding Health in Conflict Coalition. Health Workers at Risk: Violence Against Health  
20 Care. Accessed at [www.safeguardinghealth.org](http://www.safeguardinghealth.org), October 22, 2020. .
- 21 7. Devi S. COVID-19 exacerbates violence against health workers. *The Lancet*.  
22 2020;396(10252):658.
- 23 8. Brewis A, Wutich A, Mahdavi P. Stigma, pandemics, and human biology: Looking back, looking  
24 forward. *American Journal of Human Biology*. 2020.
- 25 9. Bagcchi S. Stigma during the COVID-19 pandemic. *The Lancet Infectious Diseases*.  
26 2020;20(7):782.
- 27 10. Taylor S, Landry CA, Rachor GS, Paluszek MM, Asmundson GJ. Fear and avoidance of  
28 healthcare workers: An important, under-recognized form of stigmatization during the COVID-19  
29 pandemic. *Journal of Anxiety Disorders*. 2020;75:102289.
- 30 11. Ransing R, Ramalho R, de Filippis R, Ojeahere MI, Karaliuniene R, Orsolini L, et al. Infectious  
31 Disease Outbreak Related Stigma and Discrimination during the COVID-19 Pandemic: Drivers,  
32 Facilitators, Manifestations, and Outcomes across the World. *Brain, Behavior, and Immunity*. 2020.
- 33 12. McKay D, Heisler M, Mishori R, Catton H, Kloiber O. Attacks against health-care personnel  
34 must stop, especially as the world fights COVID-19. *The Lancet*. 2020;395(10239):1743-5.
- 35 13. Diaz M. Coronavirus: Health workers face violent attacks in Mexico. *BBC News*.  
36 <https://www.bbc.com/news/world-latin-america-52676939>. Published May 17, 2020. Accessed  
37 October 20, 2020.
- 38 14. Dye T, Levandowski B, Li D, Wiltse S, Muir E, Ramos JP, et al. Multilevel Analysis of Personal,  
39 Non-Medical COVID-19-Related Impact Worldwide. *Annals of Epidemiology*. 2020.
- 40 15. De Ver Dye T, Muir E, Farovitch L, Siddiqi S, Sharma S. Critical medical ecology and SARS-COV-2  
41 in the urban environment: a pragmatic, dynamic approach to explaining and planning for research  
42 and practice. *Infectious Diseases of Poverty*. 2020;9(1):1-7.
- 43 16. Elm E, Altman DG, Egger M, Pocock SJ, Gøtzsche PC, Vandenbroucke JP. The Strengthening the  
44 Reporting of Observational Studies in Epidemiology (STROBE) statement: guidelines for reporting  
45 observational studies. *J Clin Epidemiol*. 2008;61.
- 46 17. Tong A, Sainsbury P, Craig J. Consolidated criteria for reporting qualitative research (COREQ): a  
47 32-item checklist for interviews and focus groups. *International Journal for Quality in Health Care*.  
48 2007;19(6):349-57.
- 49  
50  
51  
52  
53  
54  
55  
56  
57  
58  
59

18. Dong E, Du H, Gardner L. An interactive web-based dashboard to track COVID-19 in real time. *The Lancet infectious diseases*. 2020;20(5):533-4.
19. United Nations Statistics Division. Methodology—standard country or area codes for statistical use (M49). 2019 [
20. International Organization for Standardization. ISO Country Codes Collection: Online Browsing Platform 2020 [Available from: <https://www.iso.org/obp/ui/-search>.
21. Difallah D, Filatova E, Ipeirotis P, editors. Demographics and dynamics of mechanical Turk workers. *Proceedings of the Eleventh ACM International Conference on Web Search and Data Mining*; 2018.
22. Shaver LG, Khawer A, Yi Y, Aubrey-Bassler K, Etchegary H, Roebathan B, et al. Using Facebook advertising to recruit representative samples: Feasibility assessment of a cross-sectional survey. *Journal of Medical Internet Research*. 2019;21(8):e14021.
23. Sheehan KB, Pittman M. *Amazon's Mechanical Turk for academics: The HIT handbook for social science research*: Melvin & Leigh, Publishers; 2016.
24. Moss AJ, Rosenzweig C, Robinson J, Litman L. Is it Ethical to Use Mechanical Turk for Behavioral Research? Relevant Data from a Representative Survey of MTurk Participants and Wages. 2020.
25. Dye T, Levandowski B, Siddiqi S, Pérez Ramos J, Li D, Sharma S, et al. Non-medical COVID-19-related personal impact in medical ecological perspective: A global multileveled, mixed method study. *PLOS ONE* 2020 (submitted). 2020.
26. Hamel L, Lopez L, Muñana C, Kates J, Michaud J, Brodie M. KFF Health Tracking Poll March 2020: <https://www.kff.org/coronavirus-covid-19/poll-finding/kff-coronavirus-poll-march-2020/>; 2020 [
27. Stangl A, Brady I, Fritz K. Technical Brief: Measuring HIV stigma and discrimination; International center for research on Women, Washington D.C., USA; 2012 (updated in 2018). 2018.
28. Hosmer Jr DW, Lemeshow S. *Applied logistic regression*: John Wiley & Sons; 2004.
29. Roberto KJ, Johnson AF, Rauhaus BM. Stigmatization and prejudice during the COVID-19 pandemic. *Administrative Theory & Praxis*. 2020;42(3):364-78.
30. Kandil C. Asian Americans report over 650 racist acts over last week, new data says. *NBC News*. 2020;26.
31. Chew NW, Lee GK, Tan BY, Jing M, Goh Y, Ngiam NJ, et al. A multinational, multicentre study on the psychological outcomes and associated physical symptoms amongst healthcare workers during COVID-19 outbreak. *Brain, behavior, and immunity*. 2020.
32. Sasaki N, Kuroda R, Tsuno K, Kawakami N. Fear, worry and workplace harassment related to the COVID-19 epidemic among employees in Japan: prevalence and impact on mental and physical health. Available at SSRN 3569887. 2020.
33. Liu Q, Luo D, Haase JE, Guo Q, Wang XQ, Liu S, et al. The experiences of health-care providers during the COVID-19 crisis in China: a qualitative study. *The Lancet Global Health*. 2020.
34. Xiong Y, Peng L. Focusing on health-care providers' experiences in the COVID-19 crisis. *The Lancet Global Health*. 2020;8(6):e740-e1.
35. Taylor S, Landry C, Paluszek M, Fergus TA, McKay D, Asmundson GJ. Development and initial validation of the COVID Stress Scales. *Journal of Anxiety Disorders*. 2020:102232.
36. Withnall A. Coronavirus: why India has had to pass new law against attacks on healthcare workers. *The Independent*. April 23, 2020. Accessed October 20, 2020. <https://www.independent.co.uk/news/world/asia/coronavirus-india-doctor-nurse-attack-law-modi-health-care-workers-a9480801.html>.

- 1  
2 37. The Economist. Health workers become unexpected targets during COVID-19. The  
3 Economist. May 11, 2020. [https://www.economist.com/international/2020/05/11/health-workers-  
4 become-unexpected-targets-during-covid-19](https://www.economist.com/international/2020/05/11/health-workers-become-unexpected-targets-during-covid-19).  
5  
6 38. Semple K. 'Afraid to Be a Nurse': Health Workers Under Attack. The New York Times.  
7 Published April 27, 2020. Accessed October 20, 2020.  
8 <https://www.nytimes.com/2020/04/27/world/americas/coronavirus-health-workers-attacked.html>.  
9  
10 39. Chaiuk TA, Dunaievska OV. Fear Culture in Media: An Examination on Coronavirus Discourse.  
11 Journal of History Culture and Art Research. 2020;9(2):184-94.  
12 40. Ramaci T, Barattucci M, Ledda C, Rapisarda V. Social Stigma during COVID-19 and its impact on  
13 HCWs outcomes. Sustainability. 2020;12(9):3834.  
14 41. Cox CL. 'Healthcare Heroes': problems with media focus on heroism from healthcare workers  
15 during the COVID-19 pandemic. Journal of Medical Ethics. 2020;46(8):510-3.  
16 42. Al-Dmour H, Masa'deh P, Salman P, Abuhashesh D, Al-Dmour D. The Influence of Social Media  
17 Platforms on Public Health Protection against Coronavirus (COVID-19) Pandemic Disease via the  
18 Mediating Effects of Public Health Awareness and Behavioral Change: An Integrated Model. Journal  
19 of Medical Internet Research. 2020.  
20 43. Baldassarre A, Giorgi G, Alessio F, Lulli LG, Arcangeli G, Mucci N. Stigma and Discrimination  
21 (SAD) at the Time of the SARS-CoV-2 Pandemic. International Journal of Environmental Research and  
22 Public Health. 2020;17(17):6341.  
23 44. Abdelhafiz AS, Alorabi M. Social Stigma: The Hidden Threat of COVID-19. Frontiers in public  
24 health. 2020;8.  
25 45. World Health Organization. Mental health and psychosocial considerations during the COVID-  
26 19 outbreak, 18 March 2020. World Health Organization; 2020.  
27  
28  
29  
30  
31  
32  
33  
34  
35  
36  
37  
38  
39  
40  
41  
42  
43  
44  
45  
46  
47  
48  
49  
50  
51  
52  
53  
54  
55  
56  
57  
58  
59  
60

| <b>Table 1. Association of Demographic, Residential, Household, and COVID-19-related Variables with Working in Health Care Setting and COVID-19-related Harassment and Bullying</b>              |                                                                                                                                          |                                                                  |                       |                   |                |                                                                                                |                                                                 |                       |                   |                |
|--------------------------------------------------------------------------------------------------------------------------------------------------------------------------------------------------|------------------------------------------------------------------------------------------------------------------------------------------|------------------------------------------------------------------|-----------------------|-------------------|----------------|------------------------------------------------------------------------------------------------|-----------------------------------------------------------------|-----------------------|-------------------|----------------|
|                                                                                                                                                                                                  | <b>7. Do you work in a health care delivery setting, such as a doctor's office, clinic, hospital, nursing home, or dentist's office?</b> |                                                                  |                       |                   |                | <b>7e. Have you or a family member been harassed, bullied, or hurt because of coronavirus?</b> |                                                                 |                       |                   |                |
|                                                                                                                                                                                                  | <b>No (not checked), I do not work in a health care setting (n=6574)</b>                                                                 | <b>Yes (checked), I do work in a health care setting (n=837)</b> | <b>Total (n=7411)</b> | <b>Chi-square</b> | <b>p-value</b> | <b>Yes, I or someone have/ has been bullied (n=595)</b>                                        | <b>No, I or someone have not/ has not been bullied (n=6456)</b> | <b>Total (n=7051)</b> | <b>Chi-square</b> | <b>p-value</b> |
| <b>Among those tested: what was the result of the test for coronavirus?</b>                                                                                                                      |                                                                                                                                          |                                                                  |                       |                   |                |                                                                                                |                                                                 |                       |                   |                |
| Tested COVID-19 positive                                                                                                                                                                         | 56 (47.5)                                                                                                                                | 62 (52.5)                                                        | 118                   | 13.301            | <.001          | 61 (51.7)                                                                                      | 57 (48.3)                                                       | 118                   | 47.636            | <.001          |
| Tested COVID-19 negative                                                                                                                                                                         | 199 (66.8)                                                                                                                               | 99 (33.2)                                                        | 298                   |                   |                | 54 (18.1)                                                                                      | 244 (81.9)                                                      | 298                   |                   |                |
| <b>Do you feel you now have - or have you recently had - coronavirus infection?</b>                                                                                                              |                                                                                                                                          |                                                                  |                       |                   |                |                                                                                                |                                                                 |                       |                   |                |
| Believe have/ have had COVID-19                                                                                                                                                                  | 463 (75.4)                                                                                                                               | 151 (24.6)                                                       | 614                   | 100.442           | <.001          | 167 (27.2)                                                                                     | 446 (72.8)                                                      | 613                   | 314.954           | <.001          |
| Do not believe have/ have had COVID-19/DK if had COVID-19                                                                                                                                        | 5597 (89.2)                                                                                                                              | 678(10.8)                                                        | 6275                  |                   |                | 406 (6.5)                                                                                      | 5856 (93.5)                                                     | 6262                  |                   |                |
| <b>How closely are you following social or physical distancing, that is, staying at home, away from other people whenever you can, or staying away from other people when in a public place?</b> |                                                                                                                                          |                                                                  |                       |                   |                |                                                                                                |                                                                 |                       |                   |                |
| Followed social distancing closely                                                                                                                                                               | 5428 (88.3)                                                                                                                              | 716 (11.7)                                                       | 6144                  | 9.115             | 0.003          | 475 (7.7)                                                                                      | 5655 (92.3)                                                     | 6130                  | 26.960            | <.001          |
| Not followed social distancing closely                                                                                                                                                           | 647 (84.6)                                                                                                                               | 118 (15.4)                                                       | 765                   | 9.                |                | 101 (13.3)                                                                                     | 660 (86.7)                                                      | 761                   |                   |                |
| <b>Bought or worn a protective mask (since the coronavirus outbreak)</b>                                                                                                                         |                                                                                                                                          |                                                                  |                       |                   |                |                                                                                                |                                                                 |                       |                   |                |

**Table 1. Association of Demographic, Residential, Household, and COVID-19-related Variables with Working in Health Care Setting and COVID-19-related Harassment and Bullying**

|                                                                                              | 7. Do you work in a health care delivery setting, such as a doctor's office, clinic, hospital, nursing home, or dentist's office? |                                                           |                |            |         | 7e. Have you or a family member been harassed, bullied, or hurt because of coronavirus? |                                                          |                |            |         |
|----------------------------------------------------------------------------------------------|-----------------------------------------------------------------------------------------------------------------------------------|-----------------------------------------------------------|----------------|------------|---------|-----------------------------------------------------------------------------------------|----------------------------------------------------------|----------------|------------|---------|
|                                                                                              | No (not checked), I do not work in a health care setting (n=6574)                                                                 | Yes (checked), I do work in a health care setting (n=837) | Total (n=7411) | Chi-square | p-value | Yes, I or someone have/ has been bullied (n=595)                                        | No, I or someone have not/ has not been bullied (n=6456) | Total (n=7051) | Chi-square | p-value |
| Did not buy or wear mask                                                                     | 1350 (90.2)                                                                                                                       | 146 (9.8)                                                 | 1496           | 6.433      | 0.011   | 164 (11.1)                                                                              | 1309 (88.9)                                              | 1473           | 17.418     | <.001   |
| Bought or wore mask                                                                          | 4943 (87.9)                                                                                                                       | 682 (12.1)                                                | 5625           |            |         | 428 (7.7)                                                                               | 5108 (92.3)                                              | 5536           |            |         |
| <b>Do you personally know someone who has died from coronavirus infection (or COVID-19)?</b> |                                                                                                                                   |                                                           |                |            |         |                                                                                         |                                                          |                |            |         |
| Did not have family, friend, or neighbor die from COVID-19                                   | 6068 (90.6)                                                                                                                       | 626 (9.4)                                                 | 6694           | 260.557    | <.001   | 431 (6.8)                                                                               | 5905 (93.2)                                              | 6336           | 216.477    | <.001   |
| Had family, friend, or neighbor die from COVID-19                                            | 506 (70.6)                                                                                                                        | 211 (29.4)                                                | 717            |            |         | 164 (22.9)                                                                              | 551 (77.1)                                               | 715            |            |         |
| <b>Do you personally know someone who has coronavirus infection (or COVID-19)?</b>           |                                                                                                                                   |                                                           |                |            |         |                                                                                         |                                                          |                |            |         |
| Do not have family, friend, or neighbor with COVID-19                                        | 5315 (91.3)                                                                                                                       | 505 (8.7)                                                 | 5820           | 185.332    | <.001   | 356 (6.5)                                                                               | 5106 (93.5)                                              | 5462           | 115.730    | <.001   |
| Have family, friend, or neighbor with COVID-19                                               | 1259 (79.1)                                                                                                                       | 332 (20.9)                                                | 1591           |            |         | 239 (15.0)                                                                              | 1350 (85.0)                                              | 1589           |            |         |



**Table 1. Association of Demographic, Residential, Household, and COVID-19-related Variables with Working in Health Care Setting and COVID-19-related Harassment and Bullying**

|                                                                                                                                                                     |                                                                   | 7. Do you work in a health care delivery setting, such as a doctor's office, clinic, hospital, nursing home, or dentist's office? |                |            |         | 7e. Have you or a family member been harassed, bullied, or hurt because of coronavirus? |                                                          |                |            |         |
|---------------------------------------------------------------------------------------------------------------------------------------------------------------------|-------------------------------------------------------------------|-----------------------------------------------------------------------------------------------------------------------------------|----------------|------------|---------|-----------------------------------------------------------------------------------------|----------------------------------------------------------|----------------|------------|---------|
|                                                                                                                                                                     | No (not checked), I do not work in a health care setting (n=6574) | Yes (checked), I do work in a health care setting (n=837)                                                                         | Total (n=7411) | Chi-square | p-value | Yes, I or someone have/ has been bullied (n=595)                                        | No, I or someone have not/ has not been bullied (n=6456) | Total (n=7051) | Chi-square | p-value |
| <b>If you were required to remain at home because of quarantine or school or work closure, would you be able to do at least part of your job from home, or not?</b> |                                                                   |                                                                                                                                   |                |            |         |                                                                                         |                                                          |                |            |         |
| Could work from home/DK/NA                                                                                                                                          | 4678 (90.1)                                                       | 516 (9.9)                                                                                                                         | 5194           | 127.063    | <.001   | 367 (7.1)                                                                               | 4815 (92.9)                                              | 5182           | 42.824     | <.001   |
| Could not work from home                                                                                                                                            | 1138 (79.0)                                                       | 302 (21.0)                                                                                                                        | 1440           |            |         | 179 (12.4)                                                                              | 1259 (87.6)                                              | 1438           |            |         |
| <b>What best describes your education?</b>                                                                                                                          |                                                                   |                                                                                                                                   |                |            |         |                                                                                         |                                                          |                |            |         |
| High school or less education                                                                                                                                       | 884 (92.8)                                                        | 69 (7.2)                                                                                                                          | 953            | 23.301     | <.001   | 77 (8.1)                                                                                | 873 (91.9)                                               | 950            | .120       | 0.729   |
| More than high school education                                                                                                                                     | 4362 (87.2)                                                       | 638 (12.8)                                                                                                                        | 5000           |            |         | 387 (7.8)                                                                               | 4590 (92.2)                                              | 4977           |            |         |
| <b>What is your current age, in years?</b>                                                                                                                          |                                                                   |                                                                                                                                   |                |            |         |                                                                                         |                                                          |                |            |         |
| Age under 32 years                                                                                                                                                  | 1770 (87.8)                                                       | 247 (12.2)                                                                                                                        | 2017           | .149       | 0.7     | 165 (8.2)                                                                               | 1842 (91.8)                                              | 2007           | .127       | 0.721   |
| Age 32 years or more                                                                                                                                                | 3648 (88.1)                                                       | 493 (11.9)                                                                                                                        | 4141           |            |         | 328 (8.0)                                                                               | 3794 (92.0)                                              | 4122           |            |         |
| <b>Which of the following best describes your gender:</b>                                                                                                           |                                                                   |                                                                                                                                   |                |            |         |                                                                                         |                                                          |                |            |         |

**Table 1. Association of Demographic, Residential, Household, and COVID-19-related Variables with Working in Health Care Setting and COVID-19-related Harassment and Bullying**

|                                    | 7. Do you work in a health care delivery setting, such as a doctor's office, clinic, hospital, nursing home, or dentist's office? |                                                           |                |            |         | 7e. Have you or a family member been harassed, bullied, or hurt because of coronavirus? |                                                          |                |            |         |
|------------------------------------|-----------------------------------------------------------------------------------------------------------------------------------|-----------------------------------------------------------|----------------|------------|---------|-----------------------------------------------------------------------------------------|----------------------------------------------------------|----------------|------------|---------|
|                                    | No (not checked), I do not work in a health care setting (n=6574)                                                                 | Yes (checked), I do work in a health care setting (n=837) | Total (n=7411) | Chi-square | p-value | Yes, I or someone have/ has been bullied (n=595)                                        | No, I or someone have not/ has not been bullied (n=6456) | Total (n=7051) | Chi-square | p-value |
| Male                               | 2861 (88.7)                                                                                                                       | 366 (11.3)                                                | 3227           | 3.647      | 0.161   | 294 (9.2)                                                                               | 2918 (90.8)                                              | 3212           | 43.042     | <.001   |
| Female                             | 2465 (87.2)                                                                                                                       | 363 (12.8)                                                | 2828           |            |         | 188 (6.7)                                                                               | 2629 (93.3)                                              | 2817           |            |         |
| Other option                       | 33 (91.7)                                                                                                                         | 3 (8.3)                                                   | 36             |            |         | 12 (33.3)                                                                               | 24 (66.7)                                                | 36             |            |         |
| <b>Use social media daily</b>      |                                                                                                                                   |                                                           |                |            |         |                                                                                         |                                                          |                |            |         |
| Does not use social media daily    | 1494 (90.5)                                                                                                                       | 156 (9.5)                                                 | 1650           | 7.169      | 0.007   | 158 (12.1)                                                                              | 1146 (87.9)                                              | 1304           | 28.012     | <.001   |
| Uses social media daily            | 5080 (88.2)                                                                                                                       | 681 (11.8)                                                | 5761           |            |         | 437 (7.6)                                                                               | 5310 (92.4)                                              | 5747           |            |         |
| <b>UN Region of Residence</b>      |                                                                                                                                   |                                                           |                |            |         |                                                                                         |                                                          |                |            |         |
| Africa region                      | 504 (86.4)                                                                                                                        | 79 (13.6)                                                 | 583            | 88.135     | <.001   | 59 (11.5)                                                                               | 455 (88.5)                                               | 514            | 54.964     | <.001   |
| Northern Africa                    | 130 (90.3)                                                                                                                        | 14 (9.7)                                                  | 144            |            |         | 4 (0.03.3)                                                                              | 116 (96.7)                                               | 120            |            |         |
| Sub-Saharan Africa                 | 374 (85.2)                                                                                                                        | 65 (14.8)                                                 | 439            |            |         | 55 (0.14.0)                                                                             | 339 (86.0)                                               | 394            |            |         |
| Sub-Saharan Africa: Eastern Africa | 184 (83.3)                                                                                                                        | 37 (16.7)                                                 | 221            |            |         | 32 (0.16.1)                                                                             | 167 (83.9)                                               | 199            |            |         |
| Sub-Saharan Africa: Middle Africa  | 33 (89.2)                                                                                                                         | 4 (10.8)                                                  | 37             |            |         | 4 (0.12.1)                                                                              | 29 (87.9)                                                | 33             |            |         |

**Table 1. Association of Demographic, Residential, Household, and COVID-19-related Variables with Working in Health Care Setting and COVID-19-related Harassment and Bullying**

|                                     | 7. Do you work in a health care delivery setting, such as a doctor's office, clinic, hospital, nursing home, or dentist's office? |                                                           |                |            |         | 7e. Have you or a family member been harassed, bullied, or hurt because of coronavirus? |                                                          |                |            |         |
|-------------------------------------|-----------------------------------------------------------------------------------------------------------------------------------|-----------------------------------------------------------|----------------|------------|---------|-----------------------------------------------------------------------------------------|----------------------------------------------------------|----------------|------------|---------|
|                                     | No (not checked), I do not work in a health care setting (n=6574)                                                                 | Yes (checked), I do work in a health care setting (n=837) | Total (n=7411) | Chi-square | p-value | Yes, I or someone have/ has been bullied (n=595)                                        | No, I or someone have not/ has not been bullied (n=6456) | Total (n=7051) | Chi-square | p-value |
| Sub-Saharan Africa: Southern Africa | 60 (88.2)                                                                                                                         | 8 (11.8)                                                  | 68             |            |         | 11 (0.17.5)                                                                             | 52 (82.5)                                                | 63             |            |         |
| Sub-Saharan Africa: Western Africa  | 97 (85.8)                                                                                                                         | 16 (14.2)                                                 | 113            |            |         | 8 (0.08.1)                                                                              | 91 (91.9)                                                | 99             |            |         |
|                                     |                                                                                                                                   |                                                           |                |            |         |                                                                                         |                                                          |                |            |         |
| Asia Region                         | 1227 (83.8)                                                                                                                       | 237 (16.2)                                                | 1464           |            |         | 141 (0.10.3)                                                                            | 1234 (89.7)                                              | 1375           |            |         |
| Central Asia                        | 3 (75.0)                                                                                                                          | 1 (25.0)                                                  | 4              |            |         | 2 (0.50.0)                                                                              | 2 (50.0)                                                 | 4              |            |         |
| Eastern Asia                        | 25 (96.2)                                                                                                                         | 1 (3.8)                                                   | 26             |            |         | 1 (0.04.0)                                                                              | 24 (96.0)                                                | 25             |            |         |
| South-eastern Asia                  | 207 (90.4)                                                                                                                        | 22 (9.6)                                                  | 229            |            |         | 13 (0.06.1)                                                                             | 201 (93.9)                                               | 214            |            |         |
| Southern Asia                       | 924 (83.0)                                                                                                                        | 189 (17.0)                                                | 1113           |            |         | 112 (0.10.7)                                                                            | 932 (89.3)                                               | 1044           |            |         |
| Western Asia                        | 68 (73.9)                                                                                                                         | 24 (26.1)                                                 | 92             |            |         | 13 (0.14.8)                                                                             | 75 (85.2)                                                | 88             |            |         |
|                                     |                                                                                                                                   |                                                           |                |            |         |                                                                                         |                                                          |                |            |         |
| Europe Region                       | 1448 (93.8)                                                                                                                       | 96 (6.2)                                                  | 1544           |            |         | 76 (5.0)                                                                                | 1433 (95.0)                                              | 1509           |            |         |
| Eastern Europe                      | 84 (91.3)                                                                                                                         | 8 (8.7)                                                   | 92             |            |         | 8 (9.0)                                                                                 | 81 (91.0)                                                | 89             |            |         |
| Northern Europe                     | 464 (91.7)                                                                                                                        | 42 (8.3)                                                  | 506            |            |         | 34 (6.9)                                                                                | 462 (93.1)                                               | 496            |            |         |
| Southern Europe                     | 678 (95.1)                                                                                                                        | 35 (4.9)                                                  | 713            |            |         | 22 (3.2)                                                                                | 674 (96.8)                                               | 696            |            |         |
| Western Europe                      | 222 (95.3)                                                                                                                        | 11 (4.7)                                                  | 233            |            |         | 12 (5.3)                                                                                | 216 (94.7)                                               | 228            |            |         |
|                                     |                                                                                                                                   |                                                           |                |            |         |                                                                                         |                                                          |                |            |         |

**Table 1. Association of Demographic, Residential, Household, and COVID-19-related Variables with Working in Health Care Setting and COVID-19-related Harassment and Bullying**

|                                                                                                                                                                | 7. Do you work in a health care delivery setting, such as a doctor's office, clinic, hospital, nursing home, or dentist's office? |                                                           |                |            |         | 7e. Have you or a family member been harassed, bullied, or hurt because of coronavirus? |                                                          |                |            |         |
|----------------------------------------------------------------------------------------------------------------------------------------------------------------|-----------------------------------------------------------------------------------------------------------------------------------|-----------------------------------------------------------|----------------|------------|---------|-----------------------------------------------------------------------------------------|----------------------------------------------------------|----------------|------------|---------|
|                                                                                                                                                                | No (not checked), I do not work in a health care setting (n=6574)                                                                 | Yes (checked), I do work in a health care setting (n=837) | Total (n=7411) | Chi-square | p-value | Yes, I or someone have/ has been bullied (n=595)                                        | No, I or someone have not/ has not been bullied (n=6456) | Total (n=7051) | Chi-square | p-value |
| Latin America and the Caribbean Region                                                                                                                         | 1458 (88.6)                                                                                                                       | 187 (11.4)                                                | 1645           |            |         | 99 (6.4)                                                                                | 1459 (93.6)                                              | 1558           |            |         |
| Caribbean                                                                                                                                                      | 330 (85.3)                                                                                                                        | 57 (14.7)                                                 | 387            |            |         | 22 (6.0)                                                                                | 342 (94.0)                                               | 364            |            |         |
| Central America                                                                                                                                                | 589 (88.7)                                                                                                                        | 75 (11.3)                                                 | 664            |            |         | 49 (7.8)                                                                                | 580 (92.2)                                               | 629            |            |         |
| South America                                                                                                                                                  | 539 (90.7)                                                                                                                        | 55 (9.3)                                                  | 594            |            |         | 28 (5.0)                                                                                | 537 (95.0)                                               | 565            |            |         |
| Northern America Region                                                                                                                                        | 1490 (87.9)                                                                                                                       | 205 (12.1)                                                | 1695           |            |         | 172 (10.6)                                                                              | 1455 (89.4)                                              | 1627           |            |         |
| Oceania Region                                                                                                                                                 | 447 (93.1)                                                                                                                        | 33 (6.9)                                                  | 480            |            |         | 48 (10.3)                                                                               | 420 (89.7)                                               | 468            |            |         |
| Australia and New Zealand                                                                                                                                      | 402 (93.5)                                                                                                                        | 28 (6.5)                                                  | 430            |            |         | 41 (9.6)                                                                                | 385 (90.4)                                               | 426            |            |         |
| Melanesia                                                                                                                                                      | 21 (100.0)                                                                                                                        | 0 (0)                                                     | 21             |            |         | 2 (13.3)                                                                                | 13 (86.7)                                                | 15             |            |         |
| Micronesia                                                                                                                                                     | 17 (100.0)                                                                                                                        | 0 (0)                                                     | 17             |            |         | 0 (0)                                                                                   | 17 (100.0)                                               | 17             |            |         |
| Polynesia                                                                                                                                                      | 7 (58.3)                                                                                                                          | 5 (41.7)                                                  | 12             |            |         | 5 (50.0)                                                                                | 5 (50.0)                                                 | 10             |            |         |
| <b>Do you or does someone in your household have a serious health condition such as high blood pressure, heart disease, lung disease, cancer, or diabetes?</b> |                                                                                                                                   |                                                           |                |            |         |                                                                                         |                                                          |                |            |         |
| I do not have a chronic disease                                                                                                                                | 5335 (90.4)                                                                                                                       | 569 (9.6)                                                 | 5904           | 79.522     | <.001   | 402 (7.2)                                                                               | 5146 (92.8)                                              | 5548           | 47.917     | <.001   |

**Table 1. Association of Demographic, Residential, Household, and COVID-19-related Variables with Working in Health Care Setting and COVID-19-related Harassment and Bullying**

|                                                                   | 7. Do you work in a health care delivery setting, such as a doctor's office, clinic, hospital, nursing home, or dentist's office? |                                                           |                |            |         | 7e. Have you or a family member been harassed, bullied, or hurt because of coronavirus? |                                                          |                |            |         |
|-------------------------------------------------------------------|-----------------------------------------------------------------------------------------------------------------------------------|-----------------------------------------------------------|----------------|------------|---------|-----------------------------------------------------------------------------------------|----------------------------------------------------------|----------------|------------|---------|
|                                                                   | No (not checked), I do not work in a health care setting (n=6574)                                                                 | Yes (checked), I do work in a health care setting (n=837) | Total (n=7411) | Chi-square | p-value | Yes, I or someone have/ has been bullied (n=595)                                        | No, I or someone have not/ has not been bullied (n=6456) | Total (n=7051) | Chi-square | p-value |
| I have a chronic disease                                          | 1239 (82.2)                                                                                                                       | 268 (17.8)                                                | 1507           |            |         | 193 (12.8)                                                                              | 1310 (87.2)                                              | 1503           |            |         |
| No one in my household has a chronic disease                      | 4927 (89.9)                                                                                                                       | 553 (10.1)                                                | 5480           | 30.370     | <.001   | 421 (8.2)                                                                               | 4703 (91.8)                                              | 5124           | 1.199      | 0.274   |
| Someone else in my household has a chronic disease                | 1647 (85.3)                                                                                                                       | 284 (14.7)                                                | 1931           |            |         | 174 (9.0)                                                                               | 1753 (91.0)                                              | 1927           |            |         |
| <b>Are you responsible for taking care of children?</b>           |                                                                                                                                   |                                                           |                |            |         |                                                                                         |                                                          |                |            |         |
| I am not responsible for care of children                         | 3622 (90.3)                                                                                                                       | 388 (9.7)                                                 | 4010           | 66.162     | <.001   | 254 (6.3)                                                                               | 3748 (93.7)                                              | 4002           | 49.640     | <.001   |
| I am responsible for care of children                             | 2205 (83.6)                                                                                                                       | 432 (16.4)                                                | 2637           |            |         | 295 (11.2)                                                                              | 2334 (88.8)                                              | 2629           |            |         |
| <b>Are you responsible for taking care of any elderly people?</b> |                                                                                                                                   |                                                           |                |            |         |                                                                                         |                                                          |                |            |         |
| I am not responsible for care of elders                           | 4039 (91.4)                                                                                                                       | 378 (8.6)                                                 | 4417           | 168.604    | <.001   | 254 (6.3)                                                                               | 3748 (93.7)                                              | 4002           | 49.640     | <.001   |

**Table 1. Association of Demographic, Residential, Household, and COVID-19-related Variables with Working in Health Care Setting and COVID-19-related Harassment and Bullying**

|                                                                                                                                                            | 7. Do you work in a health care delivery setting, such as a doctor's office, clinic, hospital, nursing home, or dentist's office? |                                                           |                |            |         | 7e. Have you or a family member been harassed, bullied, or hurt because of coronavirus? |                                                          |                |            |         |
|------------------------------------------------------------------------------------------------------------------------------------------------------------|-----------------------------------------------------------------------------------------------------------------------------------|-----------------------------------------------------------|----------------|------------|---------|-----------------------------------------------------------------------------------------|----------------------------------------------------------|----------------|------------|---------|
|                                                                                                                                                            | No (not checked), I do not work in a health care setting (n=6574)                                                                 | Yes (checked), I do work in a health care setting (n=837) | Total (n=7411) | Chi-square | p-value | Yes, I or someone have/ has been bullied (n=595)                                        | No, I or someone have not/ has not been bullied (n=6456) | Total (n=7051) | Chi-square | p-value |
| I am responsible for care of elders                                                                                                                        | 1855 (80.5)                                                                                                                       | 450 (19.5)                                                | 2305           |            |         | 289 (12.6)                                                                              | 2009 (87.4)                                              | 2298           |            |         |
| <b>Do anyone in your household work in a health care delivery setting, such as a doctor's office, clinic, hospital, nursing home, or dentist's office?</b> |                                                                                                                                   |                                                           |                |            |         |                                                                                         |                                                          |                |            |         |
| No one else in my household works in a health care setting                                                                                                 | 5806 (88.5)                                                                                                                       | 754 (11.5)                                                | 6560           | 2.278      | 0.131   | 474 (7.6)                                                                               | 5730 (92.4)                                              | 6204           | 42.597     | <.001   |
| Someone else in my household works in a health care setting                                                                                                | 768 (90.2)                                                                                                                        | 83 (9.8)                                                  | 851            |            |         | 121 (14.3)                                                                              | 726 (85.7)                                               | 847            |            |         |
| <b>Do you own a car?</b>                                                                                                                                   |                                                                                                                                   |                                                           |                |            |         |                                                                                         |                                                          |                |            |         |
| I do not own a car                                                                                                                                         | 2299 (90.4)                                                                                                                       | 244 (9.6)                                                 | 2543           | 27.339     | <.001   | 222 (8.8)                                                                               | 2308 (91.2)                                              | 2530           | 1.188      | 0.276   |
| I own a car                                                                                                                                                | 3668 (86.1)                                                                                                                       | 592 (13.9)                                                | 4260           |            |         | 341 (8.0)                                                                               | 3911 (92.0)                                              | 4252           |            |         |
| <b>Do you own a home?</b>                                                                                                                                  |                                                                                                                                   |                                                           |                |            |         |                                                                                         |                                                          |                |            |         |
| I do not own a home                                                                                                                                        | 2305 (89.8)                                                                                                                       | 263 (10.2)                                                | 2568           | 15.677     | <.001   | 231 (9.0)                                                                               | 2324 (91.0)                                              | 2555           | 2.839      | 0.092   |
| I own a home                                                                                                                                               | 3655 (86.5)                                                                                                                       | 570 (13.5)                                                | 4225           |            |         | 332 (7.9)                                                                               | 3884 (92.1)                                              | 4216           |            |         |

**Table 1. Association of Demographic, Residential, Household, and COVID-19-related Variables with Working in Health Care Setting and COVID-19-related Harassment and Bullying**

|                                                                                                                                                     |                                                                   | 7. Do you work in a health care delivery setting, such as a doctor's office, clinic, hospital, nursing home, or dentist's office? |                |            |         | 7e. Have you or a family member been harassed, bullied, or hurt because of coronavirus? |                                                          |                |            |         |
|-----------------------------------------------------------------------------------------------------------------------------------------------------|-------------------------------------------------------------------|-----------------------------------------------------------------------------------------------------------------------------------|----------------|------------|---------|-----------------------------------------------------------------------------------------|----------------------------------------------------------|----------------|------------|---------|
|                                                                                                                                                     | No (not checked), I do not work in a health care setting (n=6574) | Yes (checked), I do work in a health care setting (n=837)                                                                         | Total (n=7411) | Chi-square | p-value | Yes, I or someone have/ has been bullied (n=595)                                        | No, I or someone have not/ has not been bullied (n=6456) | Total (n=7051) | Chi-square | p-value |
| <b>Do people who have had coronavirus infection (or COVID-19) lose respect or status in the community?</b>                                          |                                                                   |                                                                                                                                   |                |            |         |                                                                                         |                                                          |                |            |         |
| People with COVID-19 lose status in the community                                                                                                   | 1208 (79.8)                                                       | 306 (20.2)                                                                                                                        | 1514           | 119.934    |         | 264 (17.5)                                                                              | 1241 (82.5)                                              | 1505           | 215.153    | <.001   |
| People with COVID-19 do not lose status in the community                                                                                            | 4865 (90.2)                                                       | 530 (9.8)                                                                                                                         | 5395           |            |         | 309 (5.7)                                                                               | 5079 (94.3)                                              | 5388           |            |         |
| <b>Do people talk badly or gossip about other people who are living with, have had, or are thought to have coronavirus infection (or COVID-19)?</b> |                                                                   |                                                                                                                                   |                |            |         |                                                                                         |                                                          |                |            |         |
| People gossip about other people with COVID-19                                                                                                      | 1525 (81.2)                                                       | 353 (18.8)                                                                                                                        | 1878           | 111.356    | <.001   | 274 (14.6)                                                                              | 1598 (85.4)                                              | 1872           | 135.154    | <.001   |
| People do not gossip about other people with COVID-19                                                                                               | 4532 (90.5)                                                       | 476 (9.5)                                                                                                                         | 5008           |            |         | 297 (5.9)                                                                               | 4702 (94.1)                                              | 4999           |            |         |

**Table 2. Bivariate and Multivariate Analysis of Work in Health Care Settings and COVID-19-related Harassment and Bullying**

|                                                                                                                                                                   | 7e. Have you or a family member been harassed, bullied, or hurt because of coronavirus? |                                                          |                |            |         | Model 1: Unadjusted Odds Ratio (OR; 95% CI) | Model 2: Adjusted* Odds Ratio (aOR; 95% CI) |
|-------------------------------------------------------------------------------------------------------------------------------------------------------------------|-----------------------------------------------------------------------------------------|----------------------------------------------------------|----------------|------------|---------|---------------------------------------------|---------------------------------------------|
|                                                                                                                                                                   | Yes, I or someone have/ has been bullied (n=595)                                        | No, I or someone have not/ has not been bullied (n=6456) | Total (n=7051) | Chi-square | p-value |                                             |                                             |
| <b>Do you or anyone in your household work in a health care delivery setting, such as a doctor's office, clinic, hospital, nursing home, or dentist's office?</b> |                                                                                         |                                                          |                |            |         |                                             |                                             |
| I work in a health care setting                                                                                                                                   | 151 (18.1)                                                                              | 685 (81.9)                                               | 836            | 113.689    | <.001   | 2.9 (2.3, 3.5)                              | 1.5 (1.2, 1.9)                              |
| I do not work in a health care setting                                                                                                                            | 444 (7.1)                                                                               | 5771 (92.9)                                              | 6215           |            |         |                                             |                                             |

\*Adjusted for: Could not work from home, Have/ have had COVID-19, Have not closely followed social-physical distancing, Have friend/ family/ neighbor with COVID-19, Have friend/ family/ neighbor who died from COVID-19, Have at least one chronic disease, Have child care responsibilities, Have elder care responsibilities, Reside in Africa/ Asia/ Northern America/ Oceania



**Table 3: Frequency of qualitative codes applied to COVID-19-related harassment/ bullied/ hurt excerpts**

| Qualitative Code ( <i>7e. Been harassed, bullied, or hurt because of coronavirus, please explain</i> ) | Applied to excerpts (# (%)) (n=327) | Example quotation                                                                                                                                                                                                                                                                                                         |
|--------------------------------------------------------------------------------------------------------|-------------------------------------|---------------------------------------------------------------------------------------------------------------------------------------------------------------------------------------------------------------------------------------------------------------------------------------------------------------------------|
| Happened in/ related to the community                                                                  | 109 (33.1)                          | <i>Mi sobrina que es Medica, la Hostigan en su domicilio los vecinos diciendolae que se valla de alli...</i> (My niece, who is a doctor, is harassed at her home by the neighbors telling her to get out of there...) (Participant from South America)                                                                    |
| Happened with police/ government officials                                                             | 45 (13.7)                           | <i>The military police use very high handed methods at roadblocks and when the curfew hours start in the evening. I will just say it like that.</i> (Male participant, 50s, from Sub-Saharan Africa)                                                                                                                      |
| Involved violence                                                                                      | 44 (13.4)                           | <i>Son [is] deputy supermarket manager - has been threatened and verbally abused at work.</i> (Participant from Western Europe, 60s)                                                                                                                                                                                      |
| Racism                                                                                                 | 27 (8.2)                            | <i>My partner and his family as Asian, and they have been on the receiving end of racist remarks and harassment for the last 3 months because of this virus.</i> (Early 20s, other gender, Northern Europe)                                                                                                               |
| Happened in social media/ popular media                                                                | 23 (7.0)                            | <i>Verbal harassment on social media from COVID-19 nay-sayers</i> (Male participant, 60s, North America)                                                                                                                                                                                                                  |
| Happened in/ related to work                                                                           | 21 (6.4)                            | <i>Mi esposa trabaja en un hospital. Los vecinos no nos hablan.</i> (My wife works in a hospital. Neighbors don't speak to us.) (Male participant, 30s, Caribbean)                                                                                                                                                        |
| Happened within the family                                                                             | 19 (5.8)                            | <i>We were harassed and bullied by our overseas family, they called us cowards and a lot of other nasty things and tried to pressure us into continuing with overseas travel plans (we had asked them not to visit us as previously planned due to concerns about the virus).</i> (Female participant, 20s, from Oceania) |
| Bullied for wearing mask                                                                               | 15 (4.6)                            | <i>Yelled at for wearing a mask. Coughed on at a gas station. Just hate going out...</i> (Female participant, 60s, from North America)                                                                                                                                                                                    |
| Bullied for NOT wearing a mask                                                                         | 7 (2.1)                             | <i>E' stato picchiato poichè non aveva la mascherina. Ma non è colpa sua se non è possibile comprarle o trovarle nei negozi..</i> (He was beaten because he didn't have a mask. But it's not his fault that you can't buy them or find them in stores.) (Male participant, 20s, from Southern Europe)                     |

# Global Coronavirus Survey

Welcome! You are invited to participate in a global epidemiological survey from the University of Rochester to help us better understand attitudes, beliefs, and knowledge about topics related to current public health issues, such as coronavirus, COVID-19, and other infectious diseases, and the factors that might relate to them. If you're 18 years old or older and can answer the survey in English, please proceed below!

For peer review only

1  
2  
3  
4  
5  
6  
7  
8  
9  
10  
11  
12  
13  
14  
15  
16  
17  
18  
19  
20  
21  
22  
23  
24  
25  
26  
27  
28  
29  
30  
31  
32  
33  
34  
35  
36  
37  
38  
39  
40  
41  
42  
43  
44  
45  
46  
47  
48  
49  
50  
51  
52  
53  
54  
55  
56  
57  
58  
59  
60

SCHOOL OF MEDICINE AND DENTISTRY

Department of Obstetrics & Gynecology

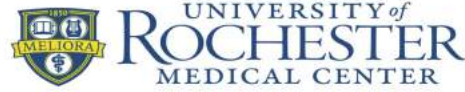

**Global Coronavirus Survey: Opinions and Practices**  
**Principal Investigator:** Timothy Dye, PhD and Eva Pressman, MD

This form describes a research study that is being conducted by faculty from the University of Rochester's School of Medicine and Dentistry.

The purpose of this study is to better understand attitudes, beliefs, and knowledge about some topics related to current public health issues, such as coronavirus and other infectious diseases, and the factors that might relate to them. The study includes questions about your thoughts and experiences about coronavirus and COVID-19, physical and mental health, stress, social support, and demographic questions. You can skip any question you wish.

If you decide to take part in this study, you will be asked to complete a survey through a link you can reach on the internet. It will take about 20-40 minutes to complete the survey. We estimate that approximately 7000 people will take part in this study.

The risks of participation are minimal. Some of the questions may be upsetting or make you feel uncomfortable. You can skip any of the questions you do not want to answer. To protect the confidentiality of the data, data will be transmitted in an encrypted format (readable only to authorized personnel). There are no expected benefits.

You will not receive compensation to participate in this survey.

The University of Rochester makes every effort to keep the information collected from you private. Results of the research may be presented at meetings or in publications, and will not identify specific people who responded. The University of Rochester is receiving payment from the Mae Stone Goode Foundation for conducting this research study.

**Your participation in this study is completely voluntary.** You do not have to participate and you can stop the survey at any time. If you choose to stop, we cannot delete your information since we do not collect any identifying information and would be unable to find and delete your record.

For more information or questions about this research you may contact Dr. Timothy Dye at [tim\\_dye@urmc.rochester.edu](mailto:tim_dye@urmc.rochester.edu).

Please contact the University of Rochester Research Subjects Review Board at 265 Crittenden Blvd., CU 420315, Rochester, NY 14642, Telephone +1 (585) 276-0005 or +1 (877) 449-4441 for the following reasons:

- You wish to talk to someone other than the research staff about your rights as a research subject;
- To voice concerns about the research.

RSRB STUDY00004825  
Version Date: April 28, 2020

RSRB Approval Date: 4/28/2020

---

1 Information  
2 Sheet  
3  
4  
5

6 Study Title: Global Coronavirus Survey: Opinions and Practices  
7

8 Principal Investigators: Dr. Timothy Dye, Dr. Eva Pressman  
9

10  
11 This form describes a research study that is being conducted by faculty from the University of Rochester's School of  
12 Medicine and Dentistry.

13 The purpose of this study is to better understand attitudes, beliefs, and knowledge about some topics related to  
14 current public health issues, such as coronavirus and other infectious diseases, and the factors that might relate to  
15 them.  
16

17 The risks of participation are minimal. Some of the questions may be upsetting or make you feel uncomfortable. You  
18 can skip any of the questions you do not want to answer. To protect the confidentiality of the data, data will be  
19 transmitted in an encrypted format (readable only to authorized personnel). There are no expected benefits.  
20

21 The University of Rochester makes every effort to keep the information collected from you private. Results of the  
22 research may be presented at meetings or in publications, and will not identify specific people who responded.  
23

24 Your participation in this study is completely voluntary. You are free not to participate or to withdraw at any time, for  
25 whatever reason.  
26

27 For more information or questions about this research you may contact Dr. Timothy Dye at +1 585-276-6953 and  
28 tim\_dye@urmc.rochester.edu.  
29

30 Please contact the University of Rochester Research Subjects Review Board at 265 Crittenden Blvd., CU 420315,  
31 Rochester, NY 14642, Telephone +1 (585) 276-0005 or +1 (877) 449-4441 for the following reasons:  
32

- 33 • You wish to talk to someone other than the research staff about your rights as a research subject;
- 34 • To voice concerns about the research.  
35  
36

---

37  
38  
39  
40  
41 Continue with the survey?

- 42  Yes  
43  No  
44  
45  
46  
47  
48  
49  
50  
51  
52  
53  
54  
55  
56  
57  
58  
59  
60

1 **Section 1: Country Questions**  
2  
3  
4  
5  
6  
7  
8  
9  
10  
11  
12  
13  
14  
15  
16  
17  
18  
19  
20  
21  
22  
23  
24  
25  
26  
27  
28  
29  
30  
31  
32  
33  
34  
35  
36  
37  
38  
39  
40  
41  
42  
43  
44  
45  
46  
47  
48  
49  
50  
51  
52  
53  
54  
55  
56  
57  
58  
59  
60

For peer review only

1 1. What country do you live in?  
2  
3  
4  
5  
6  
7  
8  
9  
10  
11  
12  
13  
14  
15  
16  
17  
18  
19  
20  
21  
22  
23  
24  
25  
26  
27  
28  
29  
30  
31  
32  
33  
34  
35  
36  
37  
38  
39  
40  
41  
42  
43  
44  
45  
46  
47  
48  
49  
50  
51  
52  
53  
54  
55  
56  
57  
58  
59  
60

- Afghanistan
- Åland Islands
- Albania
- Algeria
- American Samoa
- Andorra
- Angola
- Anguilla
- Antarctica[a]
- Antigua and Barbuda
- Argentina
- Armenia
- Aruba
- Australia[b]
- Austria
- Azerbaijan
- Bahamas (the)
- Bahrain
- Bangladesh
- Barbados
- Belarus
- Belgium
- Belize
- Benin
- Bermuda
- Bhutan
- Bolivia (Plurinational State of)
- Bonaire
- Sint Eustatius
- Saba
- Bosnia and Herzegovina
- Botswana
- Bouvet Island
- Brazil
- British Indian Ocean Territory (the)
- Brunei Darussalam[e]
- Bulgaria
- Burkina Faso
- Burundi
- Cabo Verde[f]
- Cambodia
- Cameroon
- Canada
- Cayman Islands (the)
- Central African Republic (the)
- Chad
- Chile
- China
- Christmas Island
- Cocos (Keeling) Islands (the)
- Colombia
- Comoros (the)
- Congo (the Democratic Republic of the)
- Congo (the)[g]
- Cook Islands (the)
- Costa Rica
- Côte d'Ivoire[h]
- Croatia
- Cuba
- Curaçao
- Cyprus
- Czechia[i]
- Denmark
- Djibouti
- Dominica
- Dominican Republic (the)
- Ecuador
- Egypt
- El Salvador

1  
2  
3  
4  
5  
6  
7  
8  
9  
10  
11  
12  
13  
14  
15  
16  
17  
18  
19  
20  
21  
22  
23  
24  
25  
26  
27  
28  
29  
30  
31  
32  
33  
34  
35  
36  
37  
38  
39  
40  
41  
42  
43  
44  
45  
46  
47  
48  
49  
50  
51  
52  
53  
54  
55  
56  
57  
58  
59  
60

- Equatorial Guinea
- Eritrea
- Estonia
- Eswatini[j]
- Ethiopia
- Falkland Islands (the) [Malvinas][k]
- Faroe Islands (the)
- Fiji
- Finland
- France[l]
- French Guiana
- French Polynesia
- French Southern Territories (the)[m]
- Gabon
- Gambia (the)
- Georgia
- Germany
- Ghana
- Gibraltar
- Greece
- Greenland
- Grenada
- Guadeloupe
- Guam
- Guatemala
- Guernsey
- Guinea
- Guinea-Bissau
- Guyana
- Heard Island and McDonald Islands
- Holy See (the)[n]
- Honduras
- Hong Kong
- Hungary
- Iceland
- India
- Indonesia
- Iran (Islamic Republic of)
- Iraq
- Ireland
- Isle of Man
- Israel
- Italy
- Jamaica
- Japan
- Jersey
- Jordan
- Kazakhstan
- Kenya
- Kiribati
- Korea (the Democratic People's Republic of)[o]
- Korea (the Republic of)[p]
- Kuwait
- Kyrgyzstan
- Lao People's Democratic Republic (the)[q]
- Latvia
- Lebanon
- Lesotho
- Liberia
- Libya
- Liechtenstein
- Lithuania
- Luxembourg
- Macao[r]
- North Macedonia[s]
- Madagascar
- Malawi
- Malaysia
- Maldives
- Mali
- Malta

1  
2  
3  
4  
5  
6  
7  
8  
9  
10  
11  
12  
13  
14  
15  
16  
17  
18  
19  
20  
21  
22  
23  
24  
25  
26  
27  
28  
29  
30  
31  
32  
33  
34  
35  
36  
37  
38  
39  
40  
41  
42  
43  
44  
45  
46  
47  
48  
49  
50  
51  
52  
53  
54  
55  
56  
57  
58  
59  
60

- Marshall Islands (the)
- Martinique
- Mauritania
- Mauritius
- Mayotte
- Mexico
- Micronesia (Federated States of)
- Moldova (the Republic of)
- Monaco
- Mongolia
- Montenegro
- Montserrat
- Morocco
- Mozambique
- Myanmar[t]
- Namibia
- Nauru
- Nepal
- Netherlands (the)
- New Caledonia
- New Zealand
- Nicaragua
- Niger (the)
- Nigeria
- Niue
- Norfolk Island
- Northern Mariana Islands (the)
- Norway
- Oman
- Pakistan
- Palau
- Palestine, State of
- Panama
- Papua New Guinea
- Paraguay
- Peru
- Philippines (the)
- Pitcairn[u]
- Poland
- Portugal
- Puerto Rico
- Qatar
- Réunion
- Romania
- Russian Federation (the)[v]
- Rwanda
- Saint Barthélemy
- Saint Helena
- Ascension Island
- Tristan da Cunha
- Saint Kitts and Nevis
- Saint Lucia
- Saint Martin (French part)
- Saint Pierre and Miquelon
- Saint Vincent and the Grenadines
- Samoa
- San Marino
- Sao Tome and Principe
- Saudi Arabia
- Senegal
- Serbia
- Seychelles
- Sierra Leone
- Singapore
- Sint Maarten (Dutch part)
- Slovakia
- Slovenia
- Solomon Islands
- Somalia
- South Africa
- South Georgia and the South Sandwich Islands



1  
2  
3  
4  
5  
6  
7  
8  
9  
10  
11  
12  
13  
14  
15  
16  
17  
18  
19  
20  
21  
22  
23  
24  
25  
26  
27  
28  
29  
30  
31  
32  
33  
34  
35  
36  
37  
38  
39  
40  
41  
42  
43  
44  
45  
46  
47  
48  
49  
50  
51  
52  
53  
54  
55  
56  
57  
58  
59  
60

- South Sudan
- Spain
- Sri Lanka
- Sudan (the)
- Suriname
- Svalbard
- Jan Mayen
- Sweden
- Switzerland
- Syrian Arab Republic (the)[x]
- Taiwan (Province of China)[y]
- Tajikistan
- Tanzania, the United Republic of
- Thailand
- Timor-Leste[aa]
- Togo
- Tokelau
- Tonga
- Trinidad and Tobago
- Tunisia
- Turkey
- Turkmenistan
- Turks and Caicos Islands (the)
- Tuvalu
- Uganda
- Ukraine
- United Arab Emirates (the)
- United Kingdom of Great Britain and Northern Ireland (the)
- United States Minor Outlying Islands (the)[ac]
- United States of America (the)
- Uruguay
- Uzbekistan
- Vanuatu
- Venezuela (Bolivarian Republic of)
- Viet Nam[ae]
- Virgin Islands (British)[af]
- Virgin Islands (U.S.)[ag]
- Wallis and Futuna
- Western Sahara[ah]
- Yemen
- Zambia
- Zimbabwe
- Other

---

Live in Other Country, please specify

---

1b. For US residents, what State do you live in?

- New York
- Alabama
- Alaska
- Arizona
- Arkansas
- California
- Colorado
- Connecticut
- Delaware
- Florida
- Georgia
- Hawaii
- Idaho
- Illinois
- Indiana
- Iowa
- Kansas
- Kentucky
- Louisiana
- Maine
- Maryland
- Massachusetts
- Michigan
- Minnesota
- Mississippi
- Missouri
- Montana
- Nebraska
- Nevada
- New Hampshire
- New Jersey
- New Mexico
- North Carolina
- North Dakota
- Ohio
- Oklahoma
- Oregon
- Pennsylvania
- Rhode Island
- South Carolina
- South Dakota
- Tennessee
- Texas
- Utah
- Vermont
- Virginia
- Washington
- West Virginia
- Wisconsin
- Wyoming

1c. Indian residents, what state do you live in?

- IN-AP = Andhra Pradesh
- IN-AR = Arunachal Pradesh
- IN-AS = Assam
- IN-BR = Bihar
- IN-CT = Chhattisgarh
- IN-GA = Goa
- IN-GJ = Gujarat
- IN-HR = Haryana
- IN-HP = Himachal Pradesh
- IN-JH = Jharkhand
- IN-KA = Karnataka
- IN-KL = Kerala
- IN-MP = Madhya Pradesh
- IN-MH = Maharashtra
- IN-MN = Manipur
- IN-ML = Meghalaya
- IN-MZ = Mizoram
- IN-NL = Nagaland
- IN-OR = Odisha
- IN-PB = Punjab
- IN-RJ = Rajasthan
- IN-SK = Sikkim
- IN-TN = Tamil Nadu
- IN-TG = Telangana
- IN-TR = Tripura
- IN-UT = Uttarakhand
- IN-UP = Uttar Pradesh
- IN-WB = West Bengal
- IN-AN = Andaman and Nicobar Islands
- IN-CH = Chandigarh
- IN-DN = Dadra and Nagar Haveli
- IN-DD = Daman and Diu
- IN-DL = Delhi
- IN-JK = Jammu and Kashmir
- IN-LA = Ladakh
- IN-LD = Lakshadweep
- IN-PY = Puducherry

For peer review only

1 2. What country were you born in?  
2  
3  
4  
5  
6  
7  
8  
9  
10  
11  
12  
13  
14  
15  
16  
17  
18  
19  
20  
21  
22  
23  
24  
25  
26  
27  
28  
29  
30  
31  
32  
33  
34  
35  
36  
37  
38  
39  
40  
41  
42  
43  
44  
45  
46  
47  
48  
49  
50  
51  
52  
53  
54  
55  
56  
57  
58  
59  
60

- Afghanistan
- Åland Islands
- Albania
- Algeria
- American Samoa
- Andorra
- Angola
- Anguilla
- Antarctica[a]
- Antigua and Barbuda
- Argentina
- Armenia
- Aruba
- Australia[b]
- Austria
- Azerbaijan
- Bahamas (the)
- Bahrain
- Bangladesh
- Barbados
- Belarus
- Belgium
- Belize
- Benin
- Bermuda
- Bhutan
- Bolivia (Plurinational State of)
- Bonaire
- Sint Eustatius
- Saba
- Bosnia and Herzegovina
- Botswana
- Bouvet Island
- Brazil
- British Indian Ocean Territory (the)
- Brunei Darussalam[e]
- Bulgaria
- Burkina Faso
- Burundi
- Cabo Verde[f]
- Cambodia
- Cameroon
- Canada
- Cayman Islands (the)
- Central African Republic (the)
- Chad
- Chile
- China
- Christmas Island
- Cocos (Keeling) Islands (the)
- Colombia
- Comoros (the)
- Congo (the Democratic Republic of the)
- Congo (the)[g]
- Cook Islands (the)
- Costa Rica
- Côte d'Ivoire[h]
- Croatia
- Cuba
- Curaçao
- Cyprus
- Czechia[i]
- Denmark
- Djibouti
- Dominica
- Dominican Republic (the)
- Ecuador
- Egypt
- El Salvador

1  
2  
3  
4  
5  
6  
7  
8  
9  
10  
11  
12  
13  
14  
15  
16  
17  
18  
19  
20  
21  
22  
23  
24  
25  
26  
27  
28  
29  
30  
31  
32  
33  
34  
35  
36  
37  
38  
39  
40  
41  
42  
43  
44  
45  
46  
47  
48  
49  
50  
51  
52  
53  
54  
55  
56  
57  
58  
59  
60

- Equatorial Guinea
- Eritrea
- Estonia
- Eswatini[j]
- Ethiopia
- Falkland Islands (the) [Malvinas][k]
- Faroe Islands (the)
- Fiji
- Finland
- France[l]
- French Guiana
- French Polynesia
- French Southern Territories (the)[m]
- Gabon
- Gambia (the)
- Georgia
- Germany
- Ghana
- Gibraltar
- Greece
- Greenland
- Grenada
- Guadeloupe
- Guam
- Guatemala
- Guernsey
- Guinea
- Guinea-Bissau
- Guyana
- Heard Island and McDonald Islands
- Holy See (the)[n]
- Honduras
- Hong Kong
- Hungary
- Iceland
- India
- Indonesia
- Iran (Islamic Republic of)
- Iraq
- Ireland
- Isle of Man
- Israel
- Italy
- Jamaica
- Japan
- Jersey
- Jordan
- Kazakhstan
- Kenya
- Kiribati
- Korea (the Democratic People's Republic of)[o]
- Korea (the Republic of)[p]
- Kuwait
- Kyrgyzstan
- Lao People's Democratic Republic (the)[q]
- Latvia
- Lebanon
- Lesotho
- Liberia
- Libya
- Liechtenstein
- Lithuania
- Luxembourg
- Macao[r]
- North Macedonia[s]
- Madagascar
- Malawi
- Malaysia
- Maldives
- Mali
- Malta

1  
2  
3  
4  
5  
6  
7  
8  
9  
10  
11  
12  
13  
14  
15  
16  
17  
18  
19  
20  
21  
22  
23  
24  
25  
26  
27  
28  
29  
30  
31  
32  
33  
34  
35  
36  
37  
38  
39  
40  
41  
42  
43  
44  
45  
46  
47  
48  
49  
50  
51  
52  
53  
54  
55  
56  
57  
58  
59  
60

- Marshall Islands (the)
- Martinique
- Mauritania
- Mauritius
- Mayotte
- Mexico
- Micronesia (Federated States of)
- Moldova (the Republic of)
- Monaco
- Mongolia
- Montenegro
- Montserrat
- Morocco
- Mozambique
- Myanmar[t]
- Namibia
- Nauru
- Nepal
- Netherlands (the)
- New Caledonia
- New Zealand
- Nicaragua
- Niger (the)
- Nigeria
- Niue
- Norfolk Island
- Northern Mariana Islands (the)
- Norway
- Oman
- Pakistan
- Palau
- Palestine, State of
- Panama
- Papua New Guinea
- Paraguay
- Peru
- Philippines (the)
- Pitcairn[u]
- Poland
- Portugal
- Puerto Rico
- Qatar
- Réunion
- Romania
- Russian Federation (the)[v]
- Rwanda
- Saint Barthélemy
- Saint Helena
- Ascension Island
- Tristan da Cunha
- Saint Kitts and Nevis
- Saint Lucia
- Saint Martin (French part)
- Saint Pierre and Miquelon
- Saint Vincent and the Grenadines
- Samoa
- San Marino
- Sao Tome and Principe
- Saudi Arabia
- Senegal
- Serbia
- Seychelles
- Sierra Leone
- Singapore
- Sint Maarten (Dutch part)
- Slovakia
- Slovenia
- Solomon Islands
- Somalia
- South Africa
- South Georgia and the South Sandwich Islands

1  
2  
3  
4  
5  
6  
7  
8  
9  
10  
11  
12  
13  
14  
15  
16  
17  
18  
19  
20  
21  
22  
23  
24  
25  
26  
27  
28  
29  
30  
31  
32  
33  
34  
35  
36  
37  
38  
39  
40  
41  
42  
43  
44  
45  
46  
47  
48  
49  
50  
51  
52  
53  
54  
55  
56  
57  
58  
59  
60

- South Sudan
- Spain
- Sri Lanka
- Sudan (the)
- Suriname
- Svalbard
- Jan Mayen
- Sweden
- Switzerland
- Syrian Arab Republic (the)[x]
- Taiwan (Province of China)[y]
- Tajikistan
- Tanzania, the United Republic of
- Thailand
- Timor-Leste[aa]
- Togo
- Tokelau
- Tonga
- Trinidad and Tobago
- Tunisia
- Turkey
- Turkmenistan
- Turks and Caicos Islands (the)
- Tuvalu
- Uganda
- Ukraine
- United Arab Emirates (the)
- United Kingdom of Great Britain and Northern Ireland (the)
- United States Minor Outlying Islands (the)[ac]
- United States of America (the)
- Uruguay
- Uzbekistan
- Vanuatu
- Venezuela (Bolivarian Republic of)
- Viet Nam[ae]
- Virgin Islands (British)[af]
- Virgin Islands (U.S.)[ag]
- Wallis and Futuna
- Western Sahara[ah]
- Yemen
- Zambia
- Zimbabwe
- Other

---

Born in Other Country, please specify:

---

**Section 2: Health Attitudes**

**Each item below is a belief statement about your health with which you may agree or disagree. This is a measure of your personal beliefs; there are no right or wrong answers. Please tell us how strongly you agree or disagree with each item.**

|                                                                                      | Strongly disagree     | Disagree              | Neither disagree nor agree | Agree                 | Strongly agree        |
|--------------------------------------------------------------------------------------|-----------------------|-----------------------|----------------------------|-----------------------|-----------------------|
| 1. If I get sick, it is my own behavior which determines how soon I get well again.  | <input type="radio"/> | <input type="radio"/> | <input type="radio"/>      | <input type="radio"/> | <input type="radio"/> |
| 2. No matter what I do, if I am going to get sick, I will get sick.                  | <input type="radio"/> | <input type="radio"/> | <input type="radio"/>      | <input type="radio"/> | <input type="radio"/> |
| 3. Having regular contact with my physician is the best way for me to avoid illness. | <input type="radio"/> | <input type="radio"/> | <input type="radio"/>      | <input type="radio"/> | <input type="radio"/> |
| 4. Most things that affect my health happen to me by accident.                       | <input type="radio"/> | <input type="radio"/> | <input type="radio"/>      | <input type="radio"/> | <input type="radio"/> |
| 5. Whenever I don't feel well, I should consult a medically trained professional.    | <input type="radio"/> | <input type="radio"/> | <input type="radio"/>      | <input type="radio"/> | <input type="radio"/> |
| 6. I am in control of my health.                                                     | <input type="radio"/> | <input type="radio"/> | <input type="radio"/>      | <input type="radio"/> | <input type="radio"/> |
| 7. My family has a lot to do with my becoming sick or staying healthy.               | <input type="radio"/> | <input type="radio"/> | <input type="radio"/>      | <input type="radio"/> | <input type="radio"/> |
| 8. When I get sick, I am to blame.                                                   | <input type="radio"/> | <input type="radio"/> | <input type="radio"/>      | <input type="radio"/> | <input type="radio"/> |
| 9. Luck plays a big part in determining how soon I will recover from an illness.     | <input type="radio"/> | <input type="radio"/> | <input type="radio"/>      | <input type="radio"/> | <input type="radio"/> |
| 10. Health professionals control my health                                           | <input type="radio"/> | <input type="radio"/> | <input type="radio"/>      | <input type="radio"/> | <input type="radio"/> |
| 11. My good health is largely a matter of good fortune.                              | <input type="radio"/> | <input type="radio"/> | <input type="radio"/>      | <input type="radio"/> | <input type="radio"/> |
| 12. The main thing which affects my health is what I myself do                       | <input type="radio"/> | <input type="radio"/> | <input type="radio"/>      | <input type="radio"/> | <input type="radio"/> |
| 13. If I take care of myself, I can avoid illness.                                   | <input type="radio"/> | <input type="radio"/> | <input type="radio"/>      | <input type="radio"/> | <input type="radio"/> |



- 1 14. Whenever I recover from an illness, its usually because other  
2 people (for example, doctors,  
3 nurses, family, friends) have  
4 been taking good care of me.
- 6  
7
- 8 15. No matter what I do, I'm  
9 likely to get sick.
- 10
- 11 16. If it's meant to be, I will stay  
12 healthy.
- 13
- 14 17. If I take the right actions, I  
15 can stay healthy.
- 16 18. Regarding my health, I can  
17 only do what my doctor tells me  
18 to do.
- 19  
20  
21  
22  
23  
24  
25  
26  
27  
28  
29  
30  
31  
32  
33  
34  
35  
36  
37  
38  
39  
40  
41  
42  
43  
44  
45  
46  
47  
48  
49  
50  
51  
52  
53  
54  
55  
56  
57  
58  
59  
60

For peer review only

**Section 3 - Beliefs about Coronavirus****1. As far as you know, have public health experts recommended these actions as a way to help slow the spread of coronavirus?**

|                                                     | Yes, recommended      | No, not recommended   | Don't Know            |
|-----------------------------------------------------|-----------------------|-----------------------|-----------------------|
| a. Frequent hand washing                            | <input type="radio"/> | <input type="radio"/> | <input type="radio"/> |
| b. Boil water before drinking                       | <input type="radio"/> | <input type="radio"/> | <input type="radio"/> |
| c. Healthy people wearing facemasks in public       | <input type="radio"/> | <input type="radio"/> | <input type="radio"/> |
| d. Avoiding gatherings with large numbers of people | <input type="radio"/> | <input type="radio"/> | <input type="radio"/> |
| e. Using mosquito repellent                         | <input type="radio"/> | <input type="radio"/> | <input type="radio"/> |
| f. Staying home if you are feeling sick             | <input type="radio"/> | <input type="radio"/> | <input type="radio"/> |

g. Other recommendations

---

**2. As far as you know, which of the following is a way that coronavirus is transmitted, or spread?**

Yes, transmitted this way      No, not transmitted this way      Don't Know

a. Being in close physical proximity with someone who is infected                 

b. Touching surfaces that contain small amounts of bodily fluids from someone who is infected                 

c. Through mosquito bites                 

d. Through genes/ genetics                 

e. What other ways is coronavirus transmitted or spread? Please explain.

\_\_\_\_\_

For peer review only

**3. For each of the following, please tell us if you think this is a common symptom of coronavirus infection (COVID-19)**

|                                 | Yes, a symptom        | No, not a symptom     | Don't know            |
|---------------------------------|-----------------------|-----------------------|-----------------------|
| a. Fever                        | <input type="radio"/> | <input type="radio"/> | <input type="radio"/> |
| b. Dry cough                    | <input type="radio"/> | <input type="radio"/> | <input type="radio"/> |
| c. Vomiting                     | <input type="radio"/> | <input type="radio"/> | <input type="radio"/> |
| d. Nasal congestion/ runny nose | <input type="radio"/> | <input type="radio"/> | <input type="radio"/> |
| e. Rash                         | <input type="radio"/> | <input type="radio"/> | <input type="radio"/> |

f. Other Symptoms (Please describe:)

\_\_\_\_\_

For peer review only

1 **4. Do you think any of the groups below have a higher risk of developing serious medical**  
2 **issues if they become infected with coronavirus?**

|                                 | Yes, higher risk      | No, not higher risk   | Don't know            |
|---------------------------------|-----------------------|-----------------------|-----------------------|
| 3                               |                       |                       |                       |
| 4                               |                       |                       |                       |
| 5 a. Children                   | <input type="radio"/> | <input type="radio"/> | <input type="radio"/> |
| 6 b. Pregnant women             | <input type="radio"/> | <input type="radio"/> | <input type="radio"/> |
| 7 c. People with chronic health | <input type="radio"/> | <input type="radio"/> | <input type="radio"/> |
| 8 conditions                    |                       |                       |                       |
| 9                               |                       |                       |                       |
| 10 d. People in their early 20s | <input type="radio"/> | <input type="radio"/> | <input type="radio"/> |
| 11 e. People with obesity       | <input type="radio"/> | <input type="radio"/> | <input type="radio"/> |
| 12 f. People over 60            | <input type="radio"/> | <input type="radio"/> | <input type="radio"/> |
| 13                              |                       |                       |                       |
| 14                              |                       |                       |                       |
| 15                              |                       |                       |                       |

16 5. As far as you know, is there a vaccine to protect  
17 people from the current coronavirus, also known as  
18 COVID-19, or not?  Yes  No  Don't know

19

20 6. As far as you know, does the vaccine for influenza,  
21 or seasonal flu, protect people from the current  
22 coronavirus, also known as COVID-19, or not?  Yes  No  Don't know

23

24 7. As far as you know, if someone thinks they are  
25 having symptoms of coronavirus, what should they do?  Stay home and call a doctor or medical provider  
26  Seek health care immediately at an emergency room  
27 or urgent care facility  
28  Something else  
29  Don't Know

30

31 7a. Something else, please explain

32 \_\_\_\_\_

33

34

35

36

37

38

39

40

41

42

43

44

45

46

47

48

49

50

51

52

53

54

55

56

57

58

59

60

1 **Section 4 - Health Concerns and Experience**  
2  
3  
4

5  
6 1. Do you feel you have enough information about how  
7 to protect yourself and your family from coronavirus?

- Yes  No  Don't Know

8  
9 2. What, if anything, are you doing to protect  
10 yourself and your family from coronavirus?  
11 \_\_\_\_\_  
12 \_\_\_\_\_

13 3. Do you feel that worry or stress related to  
14 coronavirus has had a negative impact on your mental  
15 health, or not?  
16

- Yes- major impact  
 Yes - minor impact  
 No  
 Don't Know

17  
18 3b. Please explain:  
19 \_\_\_\_\_  
20 \_\_\_\_\_  
21 \_\_\_\_\_  
22 \_\_\_\_\_  
23 \_\_\_\_\_  
24 \_\_\_\_\_  
25 \_\_\_\_\_  
26 \_\_\_\_\_  
27 \_\_\_\_\_  
28 \_\_\_\_\_  
29 \_\_\_\_\_  
30 \_\_\_\_\_  
31 \_\_\_\_\_  
32 \_\_\_\_\_  
33 \_\_\_\_\_  
34 \_\_\_\_\_  
35 \_\_\_\_\_  
36 \_\_\_\_\_  
37 \_\_\_\_\_  
38 \_\_\_\_\_  
39 \_\_\_\_\_  
40 \_\_\_\_\_  
41 \_\_\_\_\_  
42 \_\_\_\_\_  
43 \_\_\_\_\_  
44 \_\_\_\_\_  
45 \_\_\_\_\_  
46 \_\_\_\_\_  
47 \_\_\_\_\_  
48 \_\_\_\_\_  
49 \_\_\_\_\_  
50 \_\_\_\_\_  
51 \_\_\_\_\_  
52 \_\_\_\_\_  
53 \_\_\_\_\_  
54 \_\_\_\_\_  
55 \_\_\_\_\_  
56 \_\_\_\_\_  
57 \_\_\_\_\_  
58 \_\_\_\_\_  
59 \_\_\_\_\_  
60

For peer review only

**q4. How effective do you feel each of the following groups have been in taking action against coronavirus and COVID-19?**

- a. The healthcare system (including hospitals, clinics, doctors, nurses, and other health providers)
- Not effective at all
  - Not very effective
  - Somewhat effective
  - Very effective

a. Please explain:

---

- b. Science (including researchers and analysts)
- Not effective at all
  - Not very effective
  - Somewhat effective
  - Very effective

b. Please explain:

---

- c. The government (including local and national governments)
- Not effective at all
  - Not very effective
  - Somewhat effective
  - Very effective

c. Please explain:

---

- d. The educational system (including primary schools, secondary schools, and universities)
- Not effective at all
  - Not very effective
  - Somewhat effective
  - Very effective

d. Please explain:

---

- e. Local shops and services (including stores, supermarkets, restaurants)
- Not effective at all
  - Not very effective
  - Somewhat effective
  - Very effective

e. Please explain:

---

- f. Industry (including large employers, factories, manufacturers)
- Not effective at all
  - Not very effective
  - Somewhat effective
  - Very effective

f. Please explain:

---

1 g. The press (including reporters, newspapers,  
2 television and visual media)

- 3  Not effective at all
- 4  Not very effective
- 5  Somewhat effective
- 6  Very effective

7 g. Please explain:  
8  
9

\_\_\_\_\_

10  
11 h. Social media platforms

- 12  Not effective at all
- 13  Not very effective
- 14  Somewhat effective
- 15  Very effective

16 h. Please explain:  
17  
18  
19  
20  
21  
22  
23  
24  
25  
26  
27  
28  
29  
30  
31  
32  
33  
34  
35  
36  
37  
38  
39  
40  
41  
42  
43  
44  
45  
46  
47  
48  
49  
50  
51  
52  
53  
54  
55  
56  
57  
58  
59  
60

\_\_\_\_\_

For peer review only



**5. How worried, if at all, are you about each of the following items?**

|                                                                                                                 | Very worried          | Somewhat worried      | Not too worried       | Not at all worried    | Don't Know            |
|-----------------------------------------------------------------------------------------------------------------|-----------------------|-----------------------|-----------------------|-----------------------|-----------------------|
| a. You or someone in your family will get sick from the coronavirus                                             | <input type="radio"/> |
| b. You will lose income due to a workplace closure or reduced hours because of coronavirus                      | <input type="radio"/> |
| c. That you will become sick with Lyme Disease                                                                  | <input type="radio"/> |
| d. Your investments such as retirement or college savings will be negatively impacted by coronavirus            | <input type="radio"/> |
| e. That you will become sick with dengue                                                                        | <input type="radio"/> |
| f. You will put yourself at risk of exposure to coronavirus because you can't afford to stay home and miss work | <input type="radio"/> |
| g. You will not be able to afford testing or treatment for coronavirus if you need it                           | <input type="radio"/> |

h. Worried about something else, please explain

- A lot
- Some
- Just a little
- Not at all
- Don't Know

5b. Please explain how much, if at all, has your life been disrupted by the coronavirus outbreak?

**6. Please tell us if you have taken any of the following actions because of the recent coronavirus outbreak.**

|                                                                                  | Yes                   | No                    | Don't Know            |
|----------------------------------------------------------------------------------|-----------------------|-----------------------|-----------------------|
| a. Decided not to travel or changed travel plans                                 | <input type="radio"/> | <input type="radio"/> | <input type="radio"/> |
| b. Bought or worn a protective mask                                              | <input type="radio"/> | <input type="radio"/> | <input type="radio"/> |
| c. Stocked up on items such as food and household supplies                       | <input type="radio"/> | <input type="radio"/> | <input type="radio"/> |
| d. Postponed or canceled health care visits                                      | <input type="radio"/> | <input type="radio"/> | <input type="radio"/> |
| e. Got extra refills on prescription medication                                  | <input type="radio"/> | <input type="radio"/> | <input type="radio"/> |
| f. Stayed home instead of going to work school, or other regular activities      | <input type="radio"/> | <input type="radio"/> | <input type="radio"/> |
| g. Postponed or canceled a medical procedure or surgery                          | <input type="radio"/> | <input type="radio"/> | <input type="radio"/> |
| h. Canceled plans to attend large gatherings such as concerts or sporting events | <input type="radio"/> | <input type="radio"/> | <input type="radio"/> |
| i. Quit my job                                                                   | <input type="radio"/> | <input type="radio"/> | <input type="radio"/> |

6b. Please share any explanation or details you would like of the items above:

---

**7. Have you experienced any of the following because of coronavirus?**

7a. Lost income from a job or business

- Yes
- No
- Don't Know

a. Lost income from a job or business, please explain

\_\_\_\_\_

7b. Been unable to get groceries

- Yes
- No
- Don't Know

b. Been unable to get groceries, please explain

\_\_\_\_\_

7c. Been unable to get cleaning supplies or hand sanitizer

- Yes
- No
- Don't Know

7c. Been unable to get cleaning supplies or hand sanitizer, please explain

\_\_\_\_\_

7d. Been unable to get prescription medication

- Yes
- No
- Don't Know

d. Been unable to get prescription medication, please explain

\_\_\_\_\_

7e. Have you or a family member been harassed, bullied, or hurt because of coronavirus

- Yes
- No
- Don't Know

7e. Been harassed, bullied, or hurt because of coronavirus, please explain.

\_\_\_\_\_

8. How closely are you following social or physical distancing, that is, staying at home, away from other people whenever you can, or staying away from other people when in a public place?

- Very closely
- Somewhat closely
- Not very closely
- Not closely at all

Please tell us more about your thoughts and experiences of social or physical distancing: (open ended)

\_\_\_\_\_

9. Have you personally been tested for coronavirus, or not?

- Yes, have been tested
- No, have not been tested
- Don't Know

1 9a. Among those tested: what was the result of the  
2 test for coronavirus?  
3  
4

- Test was positive  
 Test was negative  
 I don't know yet

5 10. Among those not tested: Have you tried to get  
6 tested for coronavirus, or not?  
7  
8

- Yes  
 No  
 Don't Know

9 11. Among those not tested: Do you think you would be  
10 able to get a test for coronavirus if you thought you  
11 needed one, or not?  
12

- Yes  
 No  
 Don't Know

13 11. Please explain where you think you would be able  
14 to get a test for coronavirus if you thought you  
15 needed one.  
16 \_\_\_\_\_  
17

18 11. Please explain why you don't think you would be  
19 able to get a test for coronavirus if you thought you  
20 needed one.  
21 \_\_\_\_\_  
22

23 12. Do you feel you now have - or have you recently  
24 had - coronavirus infection?  
25

- Yes  
 No  
 Don't Know

26 Please explain why you feel you now have - or have you  
27 recently had - coronavirus infection?  
28 \_\_\_\_\_  
29  
30

31 13. If there was a vaccine that prevented people from  
32 getting sick from coronavirus, would you get the  
33 vaccine?  
34

- Yes  
 No  
 Don't Know

35 Please explain why you would get the vaccine if there  
36 was one available?  
37 \_\_\_\_\_  
38

39 Please explain why you would not get the vaccine if  
40 there was one available?  
41 \_\_\_\_\_  
42

43 Please explain why you don't know if you would get the  
44 vaccine if there was one available?  
45 \_\_\_\_\_  
46  
47

48 14. Do you personally know someone who has coronavirus  
49 infection (or COVID-19) check all that apply?  
50

- Yes, a family member  
 Yes, a friend  
 Yes, a neighbor  
 Yes, someone else  
 No  
 I don't know

51 15. Do you personally know someone who has died from  
52 coronavirus infection (or COVID-19) check all that  
53 apply?  
54

- Yes, a family member  
 Yes, a friend  
 Yes, a neighbor  
 Yes, someone else  
 No  
 I don't know

1 16. Do people talk badly or gossip about other people  
2 who are living with, have had, or are thought to have  
3 coronavirus infection (or COVID-19)?  
4

- Definitely yes
- Probably yes
- Probably not
- Definitely not
- I don't know

7 17. Do people who have had coronavirus infection (or  
8 COVID-19) lose respect or status in the community?  
9

- Definitely yes
- Probably yes
- Probably not
- Definitely not
- I don't know

For peer review only

5  
6  
10  
11  
12  
13  
14  
15  
16  
17  
18  
19  
20  
21  
22  
23  
24  
25  
26  
27  
28  
29  
30  
31  
32  
33  
34  
35  
36  
37  
38  
39  
40  
41  
42  
43  
44  
45  
46  
47  
48  
49  
50  
51  
52  
53  
54  
55  
56  
57  
58  
59  
60

**Section 5 - Household Questions**

1  
2  
3  
4  
5  
6  
7

8 1. Do you own a car?  Yes  
9  No  
10  Choose not to answer  
11

12

13 2. Do you own a home?  Yes  
14  No  
15  Choose not to answer  
16

17 3. Are you the parent or guardian of any child under  
18 the age of 18 living in your household?  Yes  
19  No  
20  Don't Know

21 4. Has your child's school or daycare been closed for  
22 any length of time as a result of coronavirus, or not?  Yes  
23  No  
24  Don't Know

25 5. If your child's school or daycare is/was closed for  
26 two weeks or more due to coronavirus, how difficult,  
27 if at all, has it been/would it be for you to find  
28 alternative childcare?  Very Difficult  
29  Somewhat Difficult  
30  Not too Difficult  
31  Not at all Difficult

32 6. If you were required to remain at home because of  
33 quarantine or school or work closure, would you be  
34 able to do at least part of your job from home, or  
35 not?  Yes  
36  No  
37  Not applicable  
38  Don't know

39

40 6. Please explain how you would you be able to do at  
41 least part of your job from home  
42 \_\_\_\_\_  
43

44 6. Please explain why you wouldn't be able to do at  
45 least part of your job from home  
46 \_\_\_\_\_  
47

48 7. Do you or anyone in your household work in a health  
49 care delivery setting, such as a doctor's office,  
50 clinic, hospital, nursing home, or dentist's office?  
51 (check all that apply)  Yes, me  
52  Yes, someone in my household  
53  No, no one  
54  Don't know

55 8. How many children under age 18 currently live in  
56 your household? \_\_\_\_\_  
57

58 9. How many adults, age 18 and over, currently live in  
59 your household including yourself? \_\_\_\_\_  
60

10. Are you responsible for taking care of children?  Yes  
 No  
 Don't Know

1 11. Are you responsible for taking care of any elderly  
2 people?  
3

- Yes
- No
- Don't Know

4  
5  
6 Please tell us about your social support system  
7 (friends, family, neighbors):  
8  
9  
10  
11  
12  
13  
14  
15  
16  
17  
18  
19  
20  
21  
22  
23  
24  
25  
26  
27  
28  
29  
30  
31  
32  
33  
34  
35  
36  
37  
38  
39  
40  
41  
42  
43  
44  
45  
46  
47  
48  
49  
50  
51  
52  
53  
54  
55  
56  
57  
58  
59  
60

For peer review only

**Section 6: Stress in the past month**

|                                                                                                                      | Never                 | Almost never          | Sometimes             | Fairly often          | Very often            |
|----------------------------------------------------------------------------------------------------------------------|-----------------------|-----------------------|-----------------------|-----------------------|-----------------------|
| 1. In the last month, how often have you been upset because of something that happened unexpectedly?                 | <input type="radio"/> |
| 2. In the last month, how often have you felt that you were unable to control the important things in your life?     | <input type="radio"/> |
| 3. In the last month, how often have you felt nervous and "stressed"?                                                | <input type="radio"/> |
| 4. In the last month, how often have you felt confident about your ability to handle your personal problems?         | <input type="radio"/> |
| 5. In the last month, how often have you felt that things were going your way?                                       | <input type="radio"/> |
| 6. In the last month, how often have you found that you could not cope with all the things that you had to do?       | <input type="radio"/> |
| 7. In the last month, how often have you been able to control irritations in your life?                              | <input type="radio"/> |
| 8. In the last month, how often have you felt that you were on top of things?                                        | <input type="radio"/> |
| 9. In the last month, how often have you been angered because of things that were outside of your control?           | <input type="radio"/> |
| 10. In the last month, how often have you felt difficulties were piling up so high that you could not overcome them? | <input type="radio"/> |

11. Please tell us about your feelings of stress over the past month:

---



**Section 7 - Social support**

|                                                                         | Very Strongly Disagree | Strongly Disagree     | Mildly Disagree       | Neutral               | Mildly Agree          | Strongly Agree        | Very Strongly Agree   |
|-------------------------------------------------------------------------|------------------------|-----------------------|-----------------------|-----------------------|-----------------------|-----------------------|-----------------------|
| 1. There is a special person who is around when I am in need.           | <input type="radio"/>  | <input type="radio"/> | <input type="radio"/> | <input type="radio"/> | <input type="radio"/> | <input type="radio"/> | <input type="radio"/> |
| 2. There is a special person with whom I can share my joys and sorrows. | <input type="radio"/>  | <input type="radio"/> | <input type="radio"/> | <input type="radio"/> | <input type="radio"/> | <input type="radio"/> | <input type="radio"/> |
| 3. My family really tries to help me.                                   | <input type="radio"/>  | <input type="radio"/> | <input type="radio"/> | <input type="radio"/> | <input type="radio"/> | <input type="radio"/> | <input type="radio"/> |
| 4. I get the emotional help and support I need from my family.          | <input type="radio"/>  | <input type="radio"/> | <input type="radio"/> | <input type="radio"/> | <input type="radio"/> | <input type="radio"/> | <input type="radio"/> |
| 5. I have a special person who is a real source of comfort to me.       | <input type="radio"/>  | <input type="radio"/> | <input type="radio"/> | <input type="radio"/> | <input type="radio"/> | <input type="radio"/> | <input type="radio"/> |
| 6. My friends really try to help me.                                    | <input type="radio"/>  | <input type="radio"/> | <input type="radio"/> | <input type="radio"/> | <input type="radio"/> | <input type="radio"/> | <input type="radio"/> |
| 7. I can count on my friends when things go wrong.                      | <input type="radio"/>  | <input type="radio"/> | <input type="radio"/> | <input type="radio"/> | <input type="radio"/> | <input type="radio"/> | <input type="radio"/> |
| 8. I can talk about my problems with my family.                         | <input type="radio"/>  | <input type="radio"/> | <input type="radio"/> | <input type="radio"/> | <input type="radio"/> | <input type="radio"/> | <input type="radio"/> |
| 9. I have friends with whom I can share my joys and sorrows.            | <input type="radio"/>  | <input type="radio"/> | <input type="radio"/> | <input type="radio"/> | <input type="radio"/> | <input type="radio"/> | <input type="radio"/> |
| 10. There is a special person in my life who cares about my feelings.   | <input type="radio"/>  | <input type="radio"/> | <input type="radio"/> | <input type="radio"/> | <input type="radio"/> | <input type="radio"/> | <input type="radio"/> |
| 11. My family is willing to help me make decisions.                     | <input type="radio"/>  | <input type="radio"/> | <input type="radio"/> | <input type="radio"/> | <input type="radio"/> | <input type="radio"/> | <input type="radio"/> |
| 12. I can talk about my problems with my friends.                       | <input type="radio"/>  | <input type="radio"/> | <input type="radio"/> | <input type="radio"/> | <input type="radio"/> | <input type="radio"/> | <input type="radio"/> |

**Section 8: Health Questions**

1. Would you say in general your health is

- Excellent  
 Very good  
 Good  
 Fair  
 Poor

2. Now thinking about your physical health, which includes physical illness and injury, for how many days during the past 30 days was your physical health not good?

\_\_\_\_\_ (number of days)

3. Now thinking about your mental health, which includes stress, depression, and problems with emotions, for how many days during the past 30 days was your mental health not good?

\_\_\_\_\_ (number of days)

4. During the past 30 days, for about how many days did poor physical or mental health keep you from doing your usual activities, such as self-care, work, or recreation?

\_\_\_\_\_ (number of days)

5. Was there a time in the past 12 months when you needed to get health care (for example, see a doctor) but could not because of cost?

- Yes  
 No  
 Don't Know

6. Do you or does someone in your household have a serious health condition such as high blood pressure, heart disease, lung disease, cancer, or diabetes? (check all that apply)

- Yes, I do  
 Yes, someone else in my household does  
 No, no one does  
 I don't know

7. Which of the following apply to you (check all that apply):

- I am currently pregnant  
 My partner is currently pregnant  
 Neither my partner nor I are currently pregnant

8. Would you like to become pregnant or have a child in the next year?

- Yes  
 No  
 Don't Know

1 **Section 9: Social Media**

2  
3  
4 **1. Which of the following social media platforms do you use? (Check best response for each)**

5

|                 | use daily             | a few times per week  | a few times per month | rarely use            | never use             |
|-----------------|-----------------------|-----------------------|-----------------------|-----------------------|-----------------------|
| 6               |                       |                       |                       |                       |                       |
| 7 a. Facebook   | <input type="radio"/> |
| 8 b. Twitter    | <input type="radio"/> |
| 9 c. LinkedIn   | <input type="radio"/> |
| 10 d. Instagram | <input type="radio"/> |
| 11 e. WhatsApp  | <input type="radio"/> |
| 12 f. Snapchat  | <input type="radio"/> |
| 13 g. Reddit    | <input type="radio"/> |

14  
15  
16  
17

18

19 2. How has your social media use changed since the coronavirus pandemic started?  Use social media a lot more

20  Use social media a bit more

21  Don't use social media more at all

22  Don't know

23

24 2b. Please explain how your social media use has changed since the coronavirus pandemic started:

25

26 \_\_\_\_\_

27

28

29

30

31

32

33

34

35

36

37

38

39

40

41

42

43

44

45

46

47

48

49

50

51

52

53

54

55

56

57

58

59

60

**Section 10: Demographic Questions**

1. What is your current age, in years?

\_\_\_\_\_

2. How would you describe your ethnic background?

\_\_\_\_\_

4. Do you consider yourself any of the following?  
(check all that apply)

- Mexican  
 Puerto Rican  
 Cuban

4a. If you consider yourself part of another  
Hispanic/Latinx ethnicity other than those listed  
above, please describe:

\_\_\_\_\_

4b. I do not consider myself Hispanic or Latinx

- True  
 False

5. What best describes your education?

- Did not complete high school  
 Completed secondary education, high school, or GED  
 Attended university/college but did not complete it  
 Graduated from university/college  
 Degree beyond university/college (MA, PhD, MD,  
etc.)

**6. What is your present religion, if any? Check all that apply**

|                                    | Yes                   | No                    | Choose not to answer  |
|------------------------------------|-----------------------|-----------------------|-----------------------|
| a. Christian                       | <input type="radio"/> | <input type="radio"/> | <input type="radio"/> |
| b. Jewish (Judaism)                | <input type="radio"/> | <input type="radio"/> | <input type="radio"/> |
| c. Muslim                          | <input type="radio"/> | <input type="radio"/> | <input type="radio"/> |
| d. Buddhist                        | <input type="radio"/> | <input type="radio"/> | <input type="radio"/> |
| e. Hindu                           | <input type="radio"/> | <input type="radio"/> | <input type="radio"/> |
| f. Atheist (do not believe in God) | <input type="radio"/> | <input type="radio"/> | <input type="radio"/> |
| g. Other                           | <input type="radio"/> | <input type="radio"/> | <input type="radio"/> |
| h. Don't Know                      | <input type="radio"/> | <input type="radio"/> | <input type="radio"/> |

6g. Other Religion, please specify

\_\_\_\_\_

7. If you live in the USA, please identify race/ethnicity (check all that apply)

- American Indian or Alaskan
- Asian
- Black or African American
- Native Hawaiian
- Pacific Islander
- Caucasian
- Other

7. You selected other, please specify other race/ethnicity

\_\_\_\_\_

7. Which of the following categories do you identify as?

- Hearing/non-deaf
- Hard of hearing
- deaf
- Deaf
- DeafBlind

For the purposes of this study, please use the following definitions.

Hearing/non-deaf: Person with no hearing loss;  
 Hard of hearing: Person with some hearing loss;  
 deaf: Person that has hearing loss;  
 Deaf: Person that has hearing loss and identifies with Deaf culture;  
 DeafBlind: Person with a combination of hearing loss and limited-to-no vision.

9. Which of the following best describes your gender:

- Male
- Female
- Other option

q9. You selected other option to describe your gender, please explain:

\_\_\_\_\_

10. Do you think of yourself as (check all that apply):

- Straight
- Gay
- Lesbian
- Bisexual
- Transgender
- Not listed above

1 10a. Not listed above, please state  
2  
3  
4  
5  
6  
7  
8  
9  
10  
11  
12  
13  
14  
15  
16  
17  
18  
19  
20  
21  
22  
23  
24  
25  
26  
27  
28  
29  
30  
31  
32  
33  
34  
35  
36  
37  
38  
39  
40  
41  
42  
43  
44  
45  
46  
47  
48  
49  
50  
51  
52  
53  
54  
55  
56  
57  
58  
59  
60

For peer review only

1 **Section 11: Final Question**  
2  
3  
4

5  
6 1. Please share any additional thoughts about  
7 coronavirus and COVID-19 that you might have:  
8 \_\_\_\_\_  
9  
10  
11  
12  
13  
14  
15  
16  
17  
18  
19  
20  
21  
22  
23  
24  
25  
26  
27  
28  
29  
30  
31  
32  
33  
34  
35  
36  
37  
38  
39  
40  
41  
42  
43  
44  
45  
46  
47  
48  
49  
50  
51  
52  
53  
54  
55  
56  
57  
58  
59  
60

For peer review only

**Section 12: Survey Quality**

**We would now like to ask you a few questions about this survey to improve it in the future. If you have specific questions you would like to point out please copy and paste the question in the text field.**

1. In general, the questions in this survey were "understandable." That is, you did not have to read the item more than once to understand what it was asking.

Strongly Disagree  
 Disagree  
 Neither disagree nor agree  
 Agree  
 Strongly agree

2. Were there any specific questions that were particularly difficult to understand? If yes, please specify (as best you can)

\_\_\_\_\_

3. In general, the meaning of the questions were clear and straightforward

Strongly Disagree  
 Disagree  
 Neither disagree nor agree  
 Agree  
 Strongly agree

4. Were there any specific questions that the meaning was unclear? If yes, please specify (as best you can)

Yes  No

4a. If yes, please specify (as best you can)

\_\_\_\_\_

5. The scales used to answer the questions were adequate. That is, do you feel the scale provided you with an appropriate way to respond?

Strongly Disagree  
 Disagree  
 Neither disagree nor agree  
 Agree  
 Strongly agree

6. In your opinion, were any of the questions written in such a way that there was ONLY one OBVIOUS answer for you?

Yes  
 No

6b. Please explain:

\_\_\_\_\_

Any other comments you wish to make about this study

( )

For more information about coronavirus and COVID-19, please visit

<https://www.cdc.gov/coronavirus/2019-ncov/index.html>

<https://www.cdc.gov/>

<https://www.who.int/>



# Encuesta global sobre coronavirus

1  
2 ¡Bienvenido! Lo invitamos a participar en una encuesta epidemiológica global de la Universidad de Rochester para  
3 ayudarnos a comprender mejor las actitudes, creencias y conocimientos sobre temas relacionados con asuntos de  
4 salud pública, como el coronavirus, COVID-19, y otras enfermedades infecciosas, y los factores que podrían estar  
5 relacionados con ellos. Si tiene 18 años o más y puede responder a la encuesta en español, ¡siga leyendo!  
6  
7

---

8 LANGUAGE \_\_\_\_\_  
9  
10  
11  
12  
13  
14  
15  
16  
17  
18  
19  
20  
21  
22  
23  
24  
25  
26  
27  
28  
29  
30  
31  
32  
33  
34  
35  
36  
37  
38  
39  
40  
41  
42  
43  
44  
45  
46  
47  
48  
49  
50  
51  
52  
53  
54  
55  
56  
57  
58  
59  
60

For peer review only

SCHOOL OF MEDICINE AND DENTISTRY

Department of Obstetrics & Gynecology

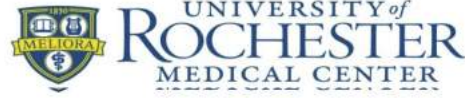

**Encuesta global sobre coronavirus: Investigador Principal de opiniones y prácticas: Timothy Dye, PhD y Eva Pressman, MD**

Este formulario describe un estudio de investigación que está llevando adelante el profesorado de la Universidad de Rochester, Facultad de Medicina y Odontología.

El objeto de este estudio es comprender mejor las actitudes, creencias y conocimientos sobre algunos temas relacionados con asuntos de salud pública, como el coronavirus y otras enfermedades infecciosas, y los factores que podrían estar relacionados con ellos. El estudio incluye preguntas acerca de sus pensamientos y experiencias con respecto al coronavirus y COVID-19, salud física y mental, estrés y apoyo social, así como también preguntas demográficas. Puede saltar todas las preguntas que quiera.

Si decide participar en este estudio, le pediremos que complete una encuesta mediante un enlace al que puede acceder por internet. Completar la encuesta le llevará aproximadamente entre 20 y 40 minutos. Estimamos que aproximadamente 7000 personas participarán en este estudio.

Los riesgos de participación son mínimos. Algunas de las preguntas podrían molestarlo o ponerlo incómodo. Puede saltar cualquier pregunta que no quiera responder. Para proteger la confidencialidad de los datos, los datos serán transmitidos en un formato encriptado (legible solamente para el personal autorizado). No se esperan beneficios de esta encuesta.

No recibirá compensación por participar en esta encuesta.

La Universidad de Rochester hace todo lo posible por mantener la información obtenida de usted confidencial. Los resultados de la investigación se pueden presentar en reuniones o en publicaciones, y no identificarán a personas específicas que respondieron.

**Su participación en este estudio es completamente voluntaria.** No está obligado a participar y puede dejar de completar la encuesta en cualquier momento. Si decide detenerse, no podemos eliminar su información, dado que no recopilamos ningún tipo de información que lo identifique, y no podríamos encontrar y eliminar su registro.

Para más información, o si tiene preguntas sobre esta investigación, puede comunicarse con el Dr. Timothy Dye, por correo electrónico a [tim\\_dye@urmc.rochester.edu](mailto:tim_dye@urmc.rochester.edu).

La Universidad de Rochester está recibiendo un pago de la Fundación Mae Stone Goode por realizar este estudio de investigación.

Por favor, comuníquese con University of Rochester Research Subjects Review Board en 265 Crittenden Blvd., CU 420315, Rochester, NY 14642, Teléfono +1 (585) 276-0005 o +1 (877) 449-4441 por las siguientes razones:

- Desea hablar con alguien que no sea el personal de investigación acerca de sus derechos como sujeto de investigación;
- Para expresar preocupaciones con respecto a la investigación.

RSRB STUDY00004825  
Version Date: April 28, 2020

RSRB Approval Date: 4/28/2020

1 Information  
2 Sheet  
3  
4  
5

6 Encuesta global sobre coronavirus: Investigador Principal de opiniones y prácticas: Timothy Dye, PhD y Eva  
7 Pressman, MD  
8  
9

10  
11 Este formulario describe un estudio de investigación que está llevando adelante el profesorado de la Universidad de  
12 Rochester, Facultad de Medicina y Odontología.  
13  
14

15 El objeto de este estudio es comprender mejor las actitudes, creencias y conocimientos sobre algunos temas  
16 relacionados con asuntos de salud pública, como el coronavirus y otras enfermedades infecciosas, y los factores que  
17 podrían estar relacionados con ellos. El estudio incluye preguntas acerca de sus pensamientos y experiencias con  
18 respecto al coronavirus y COVID-19, salud física y mental, estrés y apoyo social, así como también preguntas  
19 demográficas. Puede saltar todas las preguntas que quiera.  
20  
21  
22

23 Si decide participar en este estudio, le pediremos que complete una encuesta mediante un enlace al que puede  
24 acceder por internet. Completar la encuesta le llevará aproximadamente entre 15 y 25 minutos. Estimamos que  
25 aproximadamente 7000 personas participarán en este estudio.  
26  
27  
28

29 Los riesgos de participación son mínimos. Algunas de las preguntas podrían molestarlo o ponerlo incómodo. Puede  
30 saltar cualquier pregunta que no quiera responder. Para proteger la confidencialidad de los datos, los datos serán  
31 transmitidos en un formato encriptado (legible solamente para el personal autorizado). No se esperan beneficios de  
32 esta encuesta.  
33  
34

35 No recibirá compensación por participar en esta encuesta.  
36  
37  
38

39 La Universidad de Rochester hace todo lo posible por mantener la información obtenida de usted confidencial. Los  
40 resultados de la investigación se pueden presentar en reuniones o en publicaciones, y no identificarán a personas  
41 específicas que respondieron.  
42  
43  
44

45 Su participación en este estudio es completamente voluntaria. No está obligado a participar y puede dejar de  
46 completar la encuesta en cualquier momento. Si decide detenerse, no podemos eliminar su información, dado que  
47 no recopilamos ningún tipo de información que lo identifique, y no podríamos encontrar y eliminar su registro.  
48  
49

50 Para más información, o si tiene preguntas sobre esta investigación, puede comunicarse con el Dr. Timothy Dye, por  
51 correo electrónico a [tim\\_dye@urmc.rochester.edu](mailto:tim_dye@urmc.rochester.edu).  
52  
53  
54

55 La Universidad de Rochester está recibiendo un pago de la Fundación Mae Stone Goode por realizar este estudio de  
56 investigación.  
57  
58  
59

60 Por favor, comuníquese con University of Rochester Research Subjects Review Board en 265 Crittenden Blvd., CU  
420315, Rochester, NY 14642, Teléfono +1 (585) 276-0005 o +1 (877) 449-4441 por las siguientes razones:

1 Para expresar preocupaciones con respecto a la investigación.  
2 \_\_\_\_\_  
3  
4 \_\_\_\_\_  
5 \_\_\_\_\_

6 ¿Continuar con la encuesta?

- 7  Sí  
8  No  
9  
10  
11  
12  
13  
14  
15  
16  
17  
18  
19  
20  
21  
22  
23  
24  
25  
26  
27  
28  
29  
30  
31  
32  
33  
34  
35  
36  
37  
38  
39  
40  
41  
42  
43  
44  
45  
46  
47  
48  
49  
50  
51  
52  
53  
54  
55  
56  
57  
58  
59  
60

For peer review only

1 **Sección 1: Preguntas sobre país**  
2  
3  
4  
5  
6  
7  
8  
9  
10  
11  
12  
13  
14  
15  
16  
17  
18  
19  
20  
21  
22  
23  
24  
25  
26  
27  
28  
29  
30  
31  
32  
33  
34  
35  
36  
37  
38  
39  
40  
41  
42  
43  
44  
45  
46  
47  
48  
49  
50  
51  
52  
53  
54  
55  
56  
57  
58  
59  
60

For peer review only

1 1. ¿En qué país vive?  
2  
3  
4  
5  
6  
7  
8  
9  
10  
11  
12  
13  
14  
15  
16  
17  
18  
19  
20  
21  
22  
23  
24  
25  
26  
27  
28  
29  
30  
31  
32  
33  
34  
35  
36  
37  
38  
39  
40  
41  
42  
43  
44  
45  
46  
47  
48  
49  
50  
51  
52  
53  
54  
55  
56  
57  
58  
59  
60

- Afganistán
- Albania
- Alemania
- Andorra
- Angola
- Anguila
- Antártida [a]
- Antigua y Barbuda
- Arabia Saudita
- Argelia
- Argentina
- Armenia
- Aruba
- Australia [b]
- Austria
- Azerbaiyán
- Bahamas (el)
- Bahrein
- Bangladesh
- Barbados
- Bélgica
- Belice
- Benin
- Bielorrusia
- Bolivia (Estado Plurinacional de)
- Bonaire
- Bosnia y Herzegovina
- Botsuana
- Brasil
- Brunei Darussalam [e]
- Bulgaria
- Burkina Faso
- Burundi
- Bután
- Cabo Verde [f]
- Camboya
- Camerún
- Canadá
- Chad
- Chequia [i]
- Chile
- China
- Chipre
- Colombia
- Comoras (las)
- Congo (el) [g]
- Congo (la República Democrática del)
- Corea (la República de) [p]
- Corea (la República Popular Democrática de) [o]
- Costa de Marfil [h]
- Costa Rica
- Croacia
- Cuba
- Curagao
- Dinamarca
- Djibouti
- Dominica
- Ecuador
- Egipto
- El Salvador
- Emiratos Árabes Unidos (el)
- Eritrea
- Eslovaquia
- Eslovenia
- España
- Estados Unidos de América (el)
- Estonia
- Eswatini [j]
- Etiopía

1  
2  
3  
4  
5  
6  
7  
8  
9  
10  
11  
12  
13  
14  
15  
16  
17  
18  
19  
20  
21  
22  
23  
24  
25  
26  
27  
28  
29  
30  
31  
32  
33  
34  
35  
36  
37  
38  
39  
40  
41  
42  
43  
44  
45  
46  
47  
48  
49  
50  
51  
52  
53  
54  
55  
56  
57  
58  
59  
60

- Federación de Rusia (la) [v]
- Fiji
- Filipinas (el)
- Finlandia
- Francia [l]
- Gabón
- Gambia (el)
- Georgia
- Georgia del Sur y las Islas Sandwich del Sur
- Ghana
- Gibraltar
- Granada
- Grecia
- Groenlandia
- Guadalupe
- Guam
- Guatemala
- Guayana
- Guayana Francesa
- Guernsey
- Guinea
- Guinea Ecuatorial
- Guinea-Bissau
- Honduras
- Hong Kong
- Hungría
- India
- Indonesia
- Irak
- Irán (República Islámica de)
- Irlanda
- isla Ascencion
- Isla Bouvet
- Isla de Navidad
- Isla del hombre
- Isla Norfolk
- Islandia
- Islas Aland
- islas Bermudas
- Islas Caimán (las)
- Islas Cocos (Keeling) (las)
- Islas Cook (las)
- Islas Feroe (las)
- Islas Heard y McDonald
- Islas Malvinas (las) [Malvinas] [k]
- Islas Marianas del Norte (las)
- Islas Marshall (las)
- Islas Salomón
- Islas Turcas y Caicos (la)
- Islas ultramarinas menores de Estados Unidos (the) [ac]
- Islas Vírgenes (EE, UU,) [Ag]
- Islas Vírgenes Británicas [af]
- Israel
- Italia
- Jamaica
- Jan Mayen
- Japan
- Jersey
- Jordán
- Katar
- Kazajstán
- Kenia
- Kirguistán
- Kiribati
- Kuwait
- Lesoto
- Letonia
- Líbano
- Liberia
- Libia

1  
2  
3  
4  
5  
6  
7  
8  
9  
10  
11  
12  
13  
14  
15  
16  
17  
18  
19  
20  
21  
22  
23  
24  
25  
26  
27  
28  
29  
30  
31  
32  
33  
34  
35  
36  
37  
38  
39  
40  
41  
42  
43  
44  
45  
46  
47  
48  
49  
50  
51  
52  
53  
54  
55  
56  
57  
58  
59  
60

- Liechtenstein
- Lituania
- Luxemburgo
- Macao [r]
- Macedonia del norte [s]
- Madagascar
- Malasia
- Malawi
- Maldivas
- Mali
- Malta
- Marruecos
- Martinica
- Mauricio
- Mauritania
- Mayotte
- México
- Micronesia (Estados Federados de)
- Moldavia (la República de)
- Mónaco
- Mongolia
- Montenegro
- Montserrat
- Mozambique
- Myanmar [t]
- Namibia
- Nauru
- Nepal
- Nicaragua
- Níger (el)
- Nigeria
- Niue
- Noruega
- Nueva Caledonia
- Nueva Zelanda
- Omán
- Países Bajos (el)
- Pakistán
- Palau
- Palestina, Estado de
- Panamá
- Papúa Nueva Guinea
- Paraguay
- Perú
- Pitcairn [u]
- Polinesia francés
- Polonia
- Portugal
- Puerto Rico
- Reino Unido de Gran Bretaña e Irlanda del Norte (el)
- República Árabe Siria (la) [x]
- República Centroafricana (la)
- República Democrática Popular Lao (la) [q]
- República Dominicana (la)
- Reunión
- Ruanda
- Rumania
- Saba
- Sáhara Occidental [ah]
- Samoa
- Samoa Americana
- San Bartolomé
- San Cristóbal y Nieves
- San Eustaquio
- San Marino
- San Martín (parte francesa)
- San Pedro y Miquelón
- San Vicente y las Granadinas
- Santa Helena
- Santa Lucía



1  
2  
3  
4  
5  
6  
7  
8  
9  
10  
11  
12  
13  
14  
15  
16  
17  
18  
19  
20  
21  
22  
23  
24  
25  
26  
27  
28  
29  
30  
31  
32  
33  
34  
35  
36  
37  
38  
39  
40  
41  
42  
43  
44  
45  
46  
47  
48  
49  
50  
51  
52  
53  
54  
55  
56  
57  
58  
59  
60

- Santa Sede (la) [n]
- Santo Tomé y Príncipe
- Senegal
- Serbia
- Seychelles
- Sierra Leona
- Singapur
- Sint Maarten (parte holandesa)
- Somalia
- Sri Lanka
- Sudáfrica
- Sudán (el)
- Sudán del Sur
- Suecia
- Suiza
- Surinam
- Svalbard
- Tailandia
- Taiwán (Provincia de China) [y]
- Tanzania, la República Unida de
- Tayikistán
- Territorio Británico del Océano Índico (el)
- Territorios Australes Franceses (el) [m]
- Timor-Leste [aa]
- Togo
- Tokelau
- Tonga
- Trinidad y Tobago
- Tristan da Cunha
- Túnez
- Turkmenistán
- Turquía
- Tuvalu
- Ucrania
- Uganda
- Uruguay
- Uzbekistán
- Vanuatu
- Venezuela (República Bolivariana de)
- Vietnam [ae]
- Wallis y Futuna
- Yemen
- Zambia
- Zimbabue
- Otro

---

Vive en otro país, especifica:

---

1 1b. Si es residente de Estados Unidos, ¿en qué  
2 Estado vive?  
3

- 4  Alabama
- 5  Alaska
- 6  Arizona
- 7  Arkansas
- 8  California
- 9  Colorado
- 10  Connecticut
- 11  Delaware
- 12  Florida
- 13  Georgia
- 14  Hawaii
- 15  Idaho
- 16  Illinois
- 17  Indiana
- 18  Iowa
- 19  Kansas
- 20  Kentucky
- 21  Louisiana
- 22  Maine
- 23  Maryland
- 24  Massachusetts
- 25  Michigan
- 26  Minnesota
- 27  Mississippi
- 28  Missouri
- 29  Montana
- 30  Nebraska
- 31  Nevada
- 32  New Hampshire
- 33  New Jersey
- 34  New Mexico
- 35  New York
- 36  North Carolina
- 37  North Dakota
- 38  Ohio
- 39  Oklahoma
- 40  Oregon
- 41  Pennsylvania
- 42  Rhode Island
- 43  South Carolina
- 44  South Dakota
- 45  Tennessee
- 46  Texas
- 47  Utah
- 48  Vermont
- 49  Virginia
- 50  Washington
- 51  West Virginia
- 52  Wisconsin
- 53  Wyoming

1 1c. Si es residente de la India, ¿en qué Estado  
2 vive?  
3

- 4  IN-AP = Andhra Pradesh
- 5  IN-AR = Arunachal Pradesh
- 6  IN-AS = Assam
- 7  IN-BR = Bihar
- 8  IN-CT = Chhattisgarh
- 9  IN-GA = Goa
- 10  IN-GJ = Gujarat
- 11  IN-HR = Haryana
- 12  IN-HP = Himachal Pradesh
- 13  IN-JH = Jharkhand
- 14  IN-KA = Karnataka
- 15  IN-KL = Kerala
- 16  IN-MP = Madhya Pradesh
- 17  IN-MH = Maharashtra
- 18  IN-MN = Manipur
- 19  IN-ML = Meghalaya
- 20  IN-MZ = Mizoram
- 21  IN-NL = Nagaland
- 22  IN-OR = Odisha
- 23  IN-PB = Punjab
- 24  IN-RJ = Rajasthan
- 25  IN-SK = Sikkim
- 26  IN-TN = Tamil Nadu
- 27  IN-TG = Telangana
- 28  IN-TR = Tripura
- 29  IN-UT = Uttarakhand
- 30  IN-UP = Uttar Pradesh
- 31  IN-WB = West Bengal
- 32  IN-AN = Andaman and Nicobar Islands
- 33  IN-CH = Chandigarh
- 34  IN-DN = Dadra and Nagar Haveli
- 35  IN-DD = Daman and Diu
- 36  IN-DL = Delhi
- 37  IN-JK = Jammu and Kashmir
- 38  IN-LA = Ladakh
- 39  IN-LD = Lakshadweep
- 40  IN-PY = Puducherry

For peer review only

1 2. ¿En qué país nació?  
2  
3  
4  
5  
6  
7  
8  
9  
10  
11  
12  
13  
14  
15  
16  
17  
18  
19  
20  
21  
22  
23  
24  
25  
26  
27  
28  
29  
30  
31  
32  
33  
34  
35  
36  
37  
38  
39  
40  
41  
42  
43  
44  
45  
46  
47  
48  
49  
50  
51  
52  
53  
54  
55  
56  
57  
58  
59  
60

- Afganistán
- Albania
- Alemania
- Andorra
- Angola
- Anguila
- Antártida [a]
- Antigua y Barbuda
- Arabia Saudita
- Argelia
- Argentina
- Armenia
- Aruba
- Australia [b]
- Austria
- Azerbaiyán
- Bahamas (el)
- Bahrein
- Bangladesh
- Barbados
- Bélgica
- Belice
- Benin
- Bielorrusia
- Bolivia (Estado Plurinacional de)
- Bonaire
- Bosnia y Herzegovina
- Botsuana
- Brasil
- Brunei Darussalam [e]
- Bulgaria
- Burkina Faso
- Burundi
- Bután
- Cabo Verde [f]
- Camboya
- Camerún
- Canadá
- Chad
- Chequia [i]
- Chile
- China
- Chipre
- Colombia
- Comoras (las)
- Congo (el) [g]
- Congo (la República Democrática del)
- Corea (la República de) [p]
- Corea (la República Popular Democrática de) [o]
- Costa de Marfil [h]
- Costa Rica
- Croacia
- Cuba
- Curagao
- Dinamarca
- Djibouti
- Dominica
- Ecuador
- Egipto
- El Salvador
- Emiratos Árabes Unidos (el)
- Eritrea
- Eslovaquia
- Eslovenia
- España
- Estados Unidos de América (el)
- Estonia
- Eswatini [j]
- Etiopía

1  
2  
3  
4  
5  
6  
7  
8  
9  
10  
11  
12  
13  
14  
15  
16  
17  
18  
19  
20  
21  
22  
23  
24  
25  
26  
27  
28  
29  
30  
31  
32  
33  
34  
35  
36  
37  
38  
39  
40  
41  
42  
43  
44  
45  
46  
47  
48  
49  
50  
51  
52  
53  
54  
55  
56  
57  
58  
59  
60

- Federación de Rusia (la) [v]
- Fiji
- Filipinas (el)
- Finlandia
- Francia [l]
- Gabón
- Gambia (el)
- Georgia
- Georgia del Sur y las Islas Sandwich del Sur
- Ghana
- Gibraltar
- Granada
- Grecia
- Groenlandia
- Guadalupe
- Guam
- Guatemala
- Guayana
- Guayana Francesa
- Guernsey
- Guinea
- Guinea Ecuatorial
- Guinea-Bissau
- Honduras
- Hong Kong
- Hungría
- India
- Indonesia
- Irak
- Irán (República Islámica de)
- Irlanda
- isla Ascencion
- Isla Bouvet
- Isla de Navidad
- Isla del hombre
- Isla Norfolk
- Islandia
- Islas Aland
- islas Bermudas
- Islas Caimán (las)
- Islas Cocos (Keeling) (las)
- Islas Cook (las)
- Islas Feroe (las)
- Islas Heard y McDonald
- Islas Malvinas (las) [Malvinas] [k]
- Islas Marianas del Norte (las)
- Islas Marshall (las)
- Islas Salomón
- Islas Turcas y Caicos (la)
- Islas ultramarinas menores de Estados Unidos (the) [ac]
- Islas Vírgenes (EE, UU,) [Ag]
- Islas Vírgenes Británicas [af]
- Israel
- Italia
- Jamaica
- Jan Mayen
- Japan
- Jersey
- Jordán
- Katar
- Kazajstán
- Kenia
- Kirguistán
- Kiribati
- Kuwait
- Lesoto
- Letonia
- Líbano
- Liberia
- Libia

1  
2  
3  
4  
5  
6  
7  
8  
9  
10  
11  
12  
13  
14  
15  
16  
17  
18  
19  
20  
21  
22  
23  
24  
25  
26  
27  
28  
29  
30  
31  
32  
33  
34  
35  
36  
37  
38  
39  
40  
41  
42  
43  
44  
45  
46  
47  
48  
49  
50  
51  
52  
53  
54  
55  
56  
57  
58  
59  
60

- Liechtenstein
- Lituania
- Luxemburgo
- Macao [r]
- Macedonia del norte [s]
- Madagascar
- Malasia
- Malawi
- Maldivas
- Mali
- Malta
- Marruecos
- Martinica
- Mauricio
- Mauritania
- Mayotte
- México
- Micronesia (Estados Federados de)
- Moldavia (la República de)
- Mónaco
- Mongolia
- Montenegro
- Montserrat
- Mozambique
- Myanmar [t]
- Namibia
- Nauru
- Nepal
- Nicaragua
- Níger (el)
- Nigeria
- Niue
- Noruega
- Nueva Caledonia
- Nueva Zelanda
- Omán
- Países Bajos (el)
- Pakistán
- Palau
- Palestina, Estado de
- Panamá
- Papúa Nueva Guinea
- Paraguay
- Perú
- Pitcairn [u]
- Polinesia francés
- Polonia
- Portugal
- Puerto Rico
- Reino Unido de Gran Bretaña e Irlanda del Norte (el)
- República Árabe Siria (la) [x]
- República Centroafricana (la)
- República Democrática Popular Lao (la) [q]
- República Dominicana (la)
- Reunión
- Ruanda
- Rumania
- Saba
- Sáhara Occidental [ah]
- Samoa
- Samoa Americana
- San Bartolomé
- San Cristóbal y Nieves
- San Eustaquio
- San Marino
- San Martín (parte francesa)
- San Pedro y Miquelón
- San Vicente y las Granadinas
- Santa Helena
- Santa Lucía

1  
2  
3  
4  
5  
6  
7  
8  
9  
10  
11  
12  
13  
14  
15  
16  
17  
18  
19  
20  
21  
22  
23  
24  
25  
26  
27  
28  
29  
30  
31  
32  
33  
34  
35  
36  
37  
38  
39  
40  
41  
42  
43  
44  
45  
46  
47  
48  
49  
50  
51  
52  
53  
54  
55  
56  
57  
58  
59  
60

- Santa Sede (la) [n]
- Santo Tomé y Príncipe
- Senegal
- Serbia
- Seychelles
- Sierra Leona
- Singapur
- Sint Maarten (parte holandesa)
- Somalia
- Sri Lanka
- Sudáfrica
- Sudán (el)
- Sudán del Sur
- Suecia
- Suiza
- Surinam
- Svalbard
- Tailandia
- Taiwán (Provincia de China) [y]
- Tanzania, la República Unida de
- Tayikistán
- Territorio Británico del Océano Índico (el)
- Territorios Australes Franceses (el) [m]
- Timor-Leste [aa]
- Togo
- Tokelau
- Tonga
- Trinidad y Tobago
- Tristan da Cunha
- Túnez
- Turkmenistán
- Turquía
- Tuvalu
- Ucrania
- Uganda
- Uruguay
- Uzbekistán
- Vanuatu
- Venezuela (República Bolivariana de)
- Vietnam [ae]
- Wallis y Futuna
- Yemen
- Zambia
- Zimbabue
- Otro

---

Nació en otro país, especifique:

---

**Sección 2: Actitudes relativas a la salud**

**Cada uno de los siguientes puntos es una afirmación acerca de su salud. Puede estar de acuerdo o desacuerdo con ella. Es una medición de sus creencias personales; no hay respuestas correctas o incorrectas. Díganos cuán de acuerdo o cuán en desacuerdo está con cada punto.**

|                                                                                                             | Muy en<br>desacuerdo  | En desacuerdo         | Ni de acuerdo ni<br>en desacuerdo | De acuerdo            | Muy de acuerdo        |
|-------------------------------------------------------------------------------------------------------------|-----------------------|-----------------------|-----------------------------------|-----------------------|-----------------------|
| 1. Si me enfermo, es mi propio comportamiento lo que determina cuán pronto mejoro.                          | <input type="radio"/> | <input type="radio"/> | <input type="radio"/>             | <input type="radio"/> | <input type="radio"/> |
| 2. No importa qué haga, si me tengo que enfermar, me voy a enfermar.                                        | <input type="radio"/> | <input type="radio"/> | <input type="radio"/>             | <input type="radio"/> | <input type="radio"/> |
| 3. La mejor manera de evitar enfermarme es teniendo contacto regular con mi médico.                         | <input type="radio"/> | <input type="radio"/> | <input type="radio"/>             | <input type="radio"/> | <input type="radio"/> |
| 4. La mayoría de las cosas que afectan mi salud me suceden por accidente.                                   | <input type="radio"/> | <input type="radio"/> | <input type="radio"/>             | <input type="radio"/> | <input type="radio"/> |
| 5. Cuando no me siento bien, debo hablar con un profesional médico capacitado.                              | <input type="radio"/> | <input type="radio"/> | <input type="radio"/>             | <input type="radio"/> | <input type="radio"/> |
| 6. Estoy en control de mi salud.                                                                            | <input type="radio"/> | <input type="radio"/> | <input type="radio"/>             | <input type="radio"/> | <input type="radio"/> |
| 7. Mi familia tiene mucho que ver con si me enfermo o estoy saludable                                       | <input type="radio"/> | <input type="radio"/> | <input type="radio"/>             | <input type="radio"/> | <input type="radio"/> |
| 8. Cuando me enfermo, el culpable soy yo.                                                                   | <input type="radio"/> | <input type="radio"/> | <input type="radio"/>             | <input type="radio"/> | <input type="radio"/> |
| 9. La suerte juega un papel importante a la hora de determinar cuán rápido me recuperaré de una enfermedad. | <input type="radio"/> | <input type="radio"/> | <input type="radio"/>             | <input type="radio"/> | <input type="radio"/> |
| 10. Los profesionales de la salud controlan mi salud.                                                       | <input type="radio"/> | <input type="radio"/> | <input type="radio"/>             | <input type="radio"/> | <input type="radio"/> |
| 11. Mi buena salud se debe en gran parte a la buena suerte.                                                 | <input type="radio"/> | <input type="radio"/> | <input type="radio"/>             | <input type="radio"/> | <input type="radio"/> |
| 12. Lo principal que afecta mi salud es lo que yo, personalmente, hago                                      | <input type="radio"/> | <input type="radio"/> | <input type="radio"/>             | <input type="radio"/> | <input type="radio"/> |



- |    |                                                                                                                                                                   |                       |                       |                       |                       |                       |
|----|-------------------------------------------------------------------------------------------------------------------------------------------------------------------|-----------------------|-----------------------|-----------------------|-----------------------|-----------------------|
| 1  | 13. Si me cuido, puedo evitar enfermarme.                                                                                                                         | <input type="radio"/> |
| 2  |                                                                                                                                                                   |                       |                       |                       |                       |                       |
| 3  | 14. Cuando me recupero de una enfermedad, en general es porque otras personas (por ejemplo, médicos, enfermeros, familiares, amigos) me han estado cuidando bien. | <input type="radio"/> |
| 4  |                                                                                                                                                                   |                       |                       |                       |                       |                       |
| 5  |                                                                                                                                                                   |                       |                       |                       |                       |                       |
| 6  |                                                                                                                                                                   |                       |                       |                       |                       |                       |
| 7  |                                                                                                                                                                   |                       |                       |                       |                       |                       |
| 8  |                                                                                                                                                                   |                       |                       |                       |                       |                       |
| 9  |                                                                                                                                                                   |                       |                       |                       |                       |                       |
| 10 |                                                                                                                                                                   |                       |                       |                       |                       |                       |
| 11 | 15. No importa qué haga, es probable que me enferme.                                                                                                              | <input type="radio"/> |
| 12 |                                                                                                                                                                   |                       |                       |                       |                       |                       |
| 13 |                                                                                                                                                                   |                       |                       |                       |                       |                       |
| 14 | 16. Si tiene que ser, estaré saludable.                                                                                                                           | <input type="radio"/> |
| 15 |                                                                                                                                                                   |                       |                       |                       |                       |                       |
| 16 | 17. Si tomo las acciones correctas, me puedo mantener saludable.                                                                                                  | <input type="radio"/> |
| 17 |                                                                                                                                                                   |                       |                       |                       |                       |                       |
| 18 |                                                                                                                                                                   |                       |                       |                       |                       |                       |
| 19 |                                                                                                                                                                   |                       |                       |                       |                       |                       |
| 20 | 18. Con respecto a mi salud, solo puedo hacer lo que mi médico me dice que haga.                                                                                  | <input type="radio"/> |
| 21 |                                                                                                                                                                   |                       |                       |                       |                       |                       |
| 22 |                                                                                                                                                                   |                       |                       |                       |                       |                       |
| 23 |                                                                                                                                                                   |                       |                       |                       |                       |                       |
| 24 |                                                                                                                                                                   |                       |                       |                       |                       |                       |
| 25 |                                                                                                                                                                   |                       |                       |                       |                       |                       |
| 26 |                                                                                                                                                                   |                       |                       |                       |                       |                       |
| 27 |                                                                                                                                                                   |                       |                       |                       |                       |                       |
| 28 |                                                                                                                                                                   |                       |                       |                       |                       |                       |
| 29 |                                                                                                                                                                   |                       |                       |                       |                       |                       |
| 30 |                                                                                                                                                                   |                       |                       |                       |                       |                       |
| 31 |                                                                                                                                                                   |                       |                       |                       |                       |                       |
| 32 |                                                                                                                                                                   |                       |                       |                       |                       |                       |
| 33 |                                                                                                                                                                   |                       |                       |                       |                       |                       |
| 34 |                                                                                                                                                                   |                       |                       |                       |                       |                       |
| 35 |                                                                                                                                                                   |                       |                       |                       |                       |                       |
| 36 |                                                                                                                                                                   |                       |                       |                       |                       |                       |
| 37 |                                                                                                                                                                   |                       |                       |                       |                       |                       |
| 38 |                                                                                                                                                                   |                       |                       |                       |                       |                       |
| 39 |                                                                                                                                                                   |                       |                       |                       |                       |                       |
| 40 |                                                                                                                                                                   |                       |                       |                       |                       |                       |
| 41 |                                                                                                                                                                   |                       |                       |                       |                       |                       |
| 42 |                                                                                                                                                                   |                       |                       |                       |                       |                       |
| 43 |                                                                                                                                                                   |                       |                       |                       |                       |                       |
| 44 |                                                                                                                                                                   |                       |                       |                       |                       |                       |
| 45 |                                                                                                                                                                   |                       |                       |                       |                       |                       |
| 46 |                                                                                                                                                                   |                       |                       |                       |                       |                       |
| 47 |                                                                                                                                                                   |                       |                       |                       |                       |                       |
| 48 |                                                                                                                                                                   |                       |                       |                       |                       |                       |
| 49 |                                                                                                                                                                   |                       |                       |                       |                       |                       |
| 50 |                                                                                                                                                                   |                       |                       |                       |                       |                       |
| 51 |                                                                                                                                                                   |                       |                       |                       |                       |                       |
| 52 |                                                                                                                                                                   |                       |                       |                       |                       |                       |
| 53 |                                                                                                                                                                   |                       |                       |                       |                       |                       |
| 54 |                                                                                                                                                                   |                       |                       |                       |                       |                       |
| 55 |                                                                                                                                                                   |                       |                       |                       |                       |                       |
| 56 |                                                                                                                                                                   |                       |                       |                       |                       |                       |
| 57 |                                                                                                                                                                   |                       |                       |                       |                       |                       |
| 58 |                                                                                                                                                                   |                       |                       |                       |                       |                       |
| 59 |                                                                                                                                                                   |                       |                       |                       |                       |                       |
| 60 |                                                                                                                                                                   |                       |                       |                       |                       |                       |

For peer review only

**Sección 3 - Creencias con respecto al coronavirus****1. Según sus conocimientos, ¿los expertos de salud pública han recomendado estas acciones como una manera de ayudar a detener la propagación del coronavirus?**

|                                                            | Sí, recomendado       | No, no se recomienda  | No sabe               |
|------------------------------------------------------------|-----------------------|-----------------------|-----------------------|
| a. Lavado de manos frecuente                               | <input type="radio"/> | <input type="radio"/> | <input type="radio"/> |
| b. Hervir agua antes de beberla                            | <input type="radio"/> | <input type="radio"/> | <input type="radio"/> |
| c. Que las personas saludables usen mascarillas en público | <input type="radio"/> | <input type="radio"/> | <input type="radio"/> |
| d. Evitar reuniones con muchas personas                    | <input type="radio"/> | <input type="radio"/> | <input type="radio"/> |
| e. Usar repelente para mosquitos                           | <input type="radio"/> | <input type="radio"/> | <input type="radio"/> |
| f. Quedarse en casa si se siente enfermo                   | <input type="radio"/> | <input type="radio"/> | <input type="radio"/> |

g. Otras recomendaciones

---

**2. Según sus conocimientos, ¿cuáles de las siguientes son maneras en las que se transmite o propaga el coronavirus?**

|                                                                                                       | Sí, se transmite de esta manera | No, no se transmite de esta manera | No sabe               |
|-------------------------------------------------------------------------------------------------------|---------------------------------|------------------------------------|-----------------------|
| a. Estar en proximidad física cercana con alguien infectado                                           | <input type="radio"/>           | <input type="radio"/>              | <input type="radio"/> |
| b. Tocar superficies que contienen pequeñas cantidades de fluidos corporales de una persona infectada | <input type="radio"/>           | <input type="radio"/>              | <input type="radio"/> |
| c. A través de picaduras de mosquito                                                                  | <input type="radio"/>           | <input type="radio"/>              | <input type="radio"/> |
| d. Por los genes/la genética                                                                          | <input type="radio"/>           | <input type="radio"/>              | <input type="radio"/> |

e. ¿De qué otra manera se contagia o propaga el coronavirus? Por favor, explique

\_\_\_\_\_

For peer review only

**3. Para cada una de las siguientes, díganos si cree que es un síntoma común de infección con coronavirus (COVID-19)**

|                                 | Sí, es un síntoma     | No, no es un síntoma  | No sabe               |
|---------------------------------|-----------------------|-----------------------|-----------------------|
| a. Fiebre                       | <input type="radio"/> | <input type="radio"/> | <input type="radio"/> |
| b. Tos seca                     | <input type="radio"/> | <input type="radio"/> | <input type="radio"/> |
| c. Vómitos                      | <input type="radio"/> | <input type="radio"/> | <input type="radio"/> |
| d. Congestión nasal/goteo nasal | <input type="radio"/> | <input type="radio"/> | <input type="radio"/> |
| e. Sarpullido                   | <input type="radio"/> | <input type="radio"/> | <input type="radio"/> |

f. Otros síntomas (describir, por favor):

---

For peer review only

**4. ¿Cree que alguno de los siguientes grupos tiene un riesgo más alto de desarrollar problemas médicos graves si se infecta con coronavirus?**

|                                               | Sí, mayor riesgo      | No, no corre mayor riesgo | No sabe               |
|-----------------------------------------------|-----------------------|---------------------------|-----------------------|
| a. Niños                                      | <input type="radio"/> | <input type="radio"/>     | <input type="radio"/> |
| b. Mujeres embarazadas                        | <input type="radio"/> | <input type="radio"/>     | <input type="radio"/> |
| c. Personas con condiciones de salud crónicas | <input type="radio"/> | <input type="radio"/>     | <input type="radio"/> |
| d. Personas de entre 20 y 29 años             | <input type="radio"/> | <input type="radio"/>     | <input type="radio"/> |
| e. Personas con obesidad                      | <input type="radio"/> | <input type="radio"/>     | <input type="radio"/> |
| f. Personas mayores de 60 años                | <input type="radio"/> | <input type="radio"/>     | <input type="radio"/> |

5. Hasta donde usted sabe, ¿hay una vacuna para proteger a las personas del coronavirus actual, también conocido como COVID-19?

Sí  No  No sabe

6. Hasta donde usted sabe, ¿la vacuna contra la gripe, o la gripe estacional, protege a las personas del coronavirus actual, también conocido como COVID-19?

Sí  No  No sabe

7. Hasta donde usted sabe, si alguien cree que tiene síntomas de coronavirus, ¿qué debe hacer?

Quedarse en casa y llamar al médico o proveedor médico

Buscar atención médica de inmediato en una sala de emergencias o centro de cuidado de emergencia

Otra cosa

No sabe

7a. Otra cosa, por favor explique

---

**Sección 4 - Cuestiones de salud y experiencia**

1. ¿Siente que no tiene suficiente información sobre cómo protegerse usted y a su familia del coronavirus?  Sí  No  No sabe

2. ¿Qué hace, si hace algo, para protegerse usted y a su familia del coronavirus?

3. ¿Cree que la preocupación o el estrés en relación con el coronavirus han tenido un impacto negativo en su salud mental?  Sí- impacto importante  Sí - impacto menor  No  No sabe

3b. Por favor, explique:

For peer review only

**q4. ¿Qué tan efectivo cree que fue cada uno de los siguientes grupos en tomar medidas en contra del coronavirus y COVID-19?**

- a. El sistema de salud médica (incluyendo hospitales, clínicas, médicos, enfermeros y otros proveedores de la salud)
- Para nada eficaz
  - No muy eficaz
  - Algo eficaz
  - Muy eficaz

a. Por favor, explique:

---

- b. La ciencia (incluyendo investigadores y analistas)
- Para nada eficaz
  - No muy eficaz
  - Algo eficaz
  - Muy eficaz

b. Por favor, explique:

---

- c. El gobierno (incluyendo el gobierno local y nacional)
- Para nada eficaz
  - No muy eficaz
  - Algo eficaz
  - Muy eficaz

c. Por favor, explique:

---

- d. El sistema educativo (incluyendo escuelas primarias, escuelas secundarias y universidades)
- Para nada eficaz
  - No muy eficaz
  - Algo eficaz
  - Muy eficaz

d. Por favor, explique:

---

- e. Tiendas y servicios locales (incluyendo almacenes, supermercados, restaurantes)
- Para nada eficaz
  - No muy eficaz
  - Algo eficaz
  - Muy eficaz

e. Por favor, explique:

---

- f. La industria (incluyendo grandes empleadores, fábricas, fabricantes)
- Para nada eficaz
  - No muy eficaz
  - Algo eficaz
  - Muy eficaz

f. Por favor, explique:

---

1  
2  
3  
4  
5  
6  
7  
8  
9  
10  
11  
12  
13  
14  
15  
16  
17  
18  
19  
20  
21  
22  
23  
24  
25  
26  
27  
28  
29  
30  
31  
32  
33  
34  
35  
36  
37  
38  
39  
40  
41  
42  
43  
44  
45  
46  
47  
48  
49  
50  
51  
52  
53  
54  
55  
56  
57  
58  
59  
60

---

g. La prensa (incluyendo periodistas, periódicos, televisión y medios visuales)

- Para nada eficaz
- No muy eficaz
- Algo eficaz
- Muy eficaz

---

g. Por favor, explique:

---

---

h. Plataformas de redes sociales

- Para nada eficaz
- No muy eficaz
- Algo eficaz
- Muy eficaz

---

h. Por favor, explique:

---

For peer review only



**5. ¿Qué tan preocupado está, si es que lo está, sobre cada uno de los siguientes puntos?**

|                                                                                                                           | Muy preocupado        | Algo preocupado       | No Muy preocupado     | Para nada preocupado  | No sabe               |
|---------------------------------------------------------------------------------------------------------------------------|-----------------------|-----------------------|-----------------------|-----------------------|-----------------------|
| a. Usted o alguien en su familia contraerán el coronavirus                                                                | <input type="radio"/> |
| b. Perderá ingresos debido al cierre de su lugar de trabajo o debido a la reducción de horas a causa del coronavirus      | <input type="radio"/> |
| c. Contraer la Enfermedad de Lyme                                                                                         | <input type="radio"/> |
| d. Sus inversiones como los ahorros para el retiro o la universidad se verán afectadas por el coronavirus                 | <input type="radio"/> |
| e. Contraer dengue                                                                                                        | <input type="radio"/> |
| f. Se pondrá en riesgo de exposición al coronavirus porque no puede darse el lujo de quedarse en casa y faltar al trabajo | <input type="radio"/> |
| g. No podrá pagar las pruebas o el tratamiento para el coronavirus si lo necesita                                         | <input type="radio"/> |

h. Le preocupa otra cosa, por favor, explique

\_\_\_\_\_

5b. ¿Cuánto ha cambiado su vida, si cambió algo, debido al brote de coronavirus?

- Mucho
- Algo
- Solo un poco
- Para nada
- No sabe

5b. Por favor, explique, ¿cuánto ha cambiado su vida, si cambió algo, debido al brote de coronavirus?

\_\_\_\_\_

**6. Por favor, cuéntenos si ha tomado algunas de las siguientes medidas debido al reciente brote de coronavirus.**

|                                                                                                     | Sí                    | No                    | No sabe               |
|-----------------------------------------------------------------------------------------------------|-----------------------|-----------------------|-----------------------|
| a. Decidió no viajar o cambiar los planes de viaje                                                  | <input type="radio"/> | <input type="radio"/> | <input type="radio"/> |
| b. Compró o usó una mascarilla de protección                                                        | <input type="radio"/> | <input type="radio"/> | <input type="radio"/> |
| c. Se abasteció de artículos como alimentos y suministros para el hogar                             | <input type="radio"/> | <input type="radio"/> | <input type="radio"/> |
| d. Pospuso o canceló visitas de atención médica                                                     | <input type="radio"/> | <input type="radio"/> | <input type="radio"/> |
| e. Obtuvo recargas adicionales para los medicamentos recetados                                      | <input type="radio"/> | <input type="radio"/> | <input type="radio"/> |
| f. Se quedó en casa en lugar de ir a trabajar, a la escuela o a otras actividades regulares         | <input type="radio"/> | <input type="radio"/> | <input type="radio"/> |
| g. Pospuso o canceló un procedimiento médico o cirugía                                              | <input type="radio"/> | <input type="radio"/> | <input type="radio"/> |
| h. Canceló planes para asistir a reuniones con muchas personas como conciertos o eventos deportivos | <input type="radio"/> | <input type="radio"/> | <input type="radio"/> |
| i. Renunció a su trabajo                                                                            | <input type="radio"/> | <input type="radio"/> | <input type="radio"/> |

6b. Por favor, comparta cualquier explicación o detalle con respecto a los puntos de arriba:

---

**7. ¿Ha experimentado cualquiera de los siguientes puntos debido al coronavirus?**

7a. Perdió ingresos del trabajo o negocio

- Sí  
 No  
 No sabe

a. Perdió ingresos del trabajo o negocio; por favor, explique

---

7b. No pudo comprar alimentos

- Sí  
 No  
 No sabe

b. No pudo comprar alimentos; por favor, explique

---

7c. No pudo comprar suministros de limpieza o desinfectante para manos

- Sí  
 No  
 No sabe

7c. No pudo comprar suministros de limpieza o desinfectante para manos; por favor, explique

---

7d. No pudo obtener medicamentos recetados

- Sí  
 No  
 No sabe

d. No pudo obtener medicamentos recetados; por favor, explique

---

7e. ¿Usted o un miembro de la familia han sido víctimas de acoso, hostigamiento o fueron ofendidos debido al coronavirus?

- Sí  
 No  
 No sabe

7e. Han sido víctimas de acoso, hostigamiento o fueron ofendidos debido al coronavirus; por favor, explique

---

8. ¿Qué tan estrictamente cumple con el distanciamiento social o físico, es decir, se queda en su casa, alejado siempre que pueda, o mantiene la distancia entre usted y las otras personas cuando está en un lugar público?

- Muy estrictamente  
 Algo estrictamente  
 No muy estrictamente  
 Para nada estrictamente

Por favor, cuéntenos más sobre sus pensamientos y experiencias con respecto al distanciamiento social o físico: (abierto)

---

9. ¿Fue evaluado personalmente para detectar el coronavirus?

- Sí, me han evaluado  
 No, no me han evaluado  
 No sabe

---

1 9a. Entre los evaluados: ¿cuál fue el resultado de  
2 la prueba para detectar el coronavirus?  
3  
4  La prueba fue positiva  
 La prueba fue negativa  
 Aún no sabe

---

5 10. Entre los que no fueron evaluados: ¿Ha intentado  
6 ser evaluado para detectar el coronavirus, o no?  
7  
8  Sí  
 No  
 No sabe

---

9 11. Entre los que no fueron evaluados: ¿Cree que  
10 podría obtener una prueba para detectar el  
11 coronavirus si cree que la necesita, o no?  
12  
13  Sí  
 No  
 No sabe

---

14 11. Por favor, explique si cree que podría obtener  
15 una prueba para detectar el coronavirus si cree que la  
16 necesita.  
17 \_\_\_\_\_

---

18 11. Por favor, explique por qué no cree que podría  
19 obtener una prueba para detectar el coronavirus si  
20 cree que la necesita.  
21 \_\_\_\_\_

---

22 12. ¿Cree que tiene, o ha tenido recientemente,  
23 infección por coronavirus?  
24  
25  Sí  
 No  
 No sabe

---

26 Por favor, explique por qué cree que tiene, o ha  
27 tenido recientemente, infección del coronavirus  
28  
29 \_\_\_\_\_

---

30 13. Si hubiera una vacuna para evitar que las personas  
31 contraigan coronavirus, ¿se pondría la vacuna?  
32  
33  Sí  
 No  
 No sabe

---

34 Por favor, explique ¿por qué se pondría la vacuna  
35 si hubiese una disponible?  
36  
37 \_\_\_\_\_

---

38 Por favor, explique ¿por qué no se daría la vacuna  
39 si hubiese una disponible  
40  
41 \_\_\_\_\_

---

42 Por favor, explique ¿por qué no sabe si daría la  
43 vacuna si hubiese una disponible  
44  
45 \_\_\_\_\_

---

46 14. ¿Conoce personalmente a alguien que tenga la  
47 infección del coronavirus (o COVID-19)? Marque todas  
48 las que correspondan  
49  
50  Sí, un miembro de la familia  
 Sí, un amigo  
 Sí, un vecino  
 Sí, otra persona  
51  
52  No  
53  No sé

---

54 15. ¿Conoce personalmente a alguien que haya  
55 fallecido debido a la infección del coronavirus (o  
56 COVID-19)? Marque todas las que correspondan  
57  
58  Sí, un miembro de la familia  
 Sí, un amigo  
 Sí, un vecino  
 Sí, otra persona  
59  
60  No  
 No sé

1 16. ¿Las personas hablan mal o chismean sobre otras  
2 personas con las que viven, que han tenido o se cree  
3 que tienen la infección del coronavirus (o COVID-19)?  
4  
5  
6

- Definitivamente sí
- Probablemente sí
- Probablemente no
- Definitivamente no
- No sé

7 17. ¿Las personas que han tenido la infección del  
8 coronavirus (o COVID-19) pierden el respeto o el  
9 estatus en la comunidad?  
10  
11  
12  
13  
14  
15  
16  
17  
18  
19  
20  
21  
22  
23  
24  
25  
26  
27  
28  
29  
30  
31  
32  
33  
34  
35  
36  
37  
38  
39  
40  
41  
42  
43  
44  
45  
46  
47  
48  
49  
50  
51  
52  
53  
54  
55  
56  
57  
58  
59  
60

- Definitivamente sí
- Probablemente sí
- Probablemente no
- Definitivamente no
- No sé

For peer review only

**Sección 5 - Preguntas domésticas**

1. ¿Es dueño de un automóvil?

- Sí  
 No  
 Elijo no responder

2. ¿Es dueño de una vivienda?

- Sí  
 No  
 Elijo no responder

3. ¿Es padre o tutor de un niño menor de 18 años que vive en su vivienda?

- Sí  
 No  
 No sabe

4. ¿La escuela o guardería de su hijo ha cerrado por un período de tiempo como resultado del coronavirus?

- Sí  
 No  
 No sabe

5. Si la escuela o guardería de su hijo está/estaba cerrada por dos semanas o más debido al coronavirus, ¿qué tan difícil ha sido/sería para usted hasta encontrar un cuidado infantil alternativo?

- Muy difícil  
 Algo difícil  
 No muy difícil  
 Para nada difícil

6. Si se viera obligado a quedarse en su casa, ¿podría hacer, al menos, una parte de su trabajo desde su casa?

- Sí  
 No  
 No aplica  
 No sabe

6. Por favor, explique cómo podría hacer, al menos, una parte de su trabajo desde su casa

\_\_\_\_\_

6. Por favor, explique por qué no podría hacer, al menos, una parte de su trabajo desde su casa

\_\_\_\_\_

7. ¿Usted o alguien en su vivienda trabajan en un entorno de atención de la salud, como un consultorio médico, clínica, hospital, hogar para personas mayores o consultorio odontológico? (marque todas las que correspondan)

- Sí, yo  
 Sí, alguien en mi vivienda  
 No, nadie  
 No sabe

8. ¿Cuántos niños menores de 18 años viven actualmente en su vivienda?

\_\_\_\_\_

9. ¿Cuánto adultos, de 18 años o más, viven actualmente en su vivienda, incluido usted?

\_\_\_\_\_

10. ¿Es responsable del cuidado de los niños?

- Sí  
 No  
 No sabe

1  
2  
3  
4  
5  
6  
7  
8  
9  
10  
11  
12  
13  
14  
15  
16  
17  
18  
19  
20  
21  
22  
23  
24  
25  
26  
27  
28  
29  
30  
31  
32  
33  
34  
35  
36  
37  
38  
39  
40  
41  
42  
43  
44  
45  
46  
47  
48  
49  
50  
51  
52  
53  
54  
55  
56  
57  
58  
59  
60

---

11. ¿Es responsable del cuidado de personas mayores?

- Sí
- No
- No sabe

---

Por favor, cuéntenos sobre su sistema de apoyo social  
(amigos, familia, vecinos):

---

For peer review only

**Sección 6: Estrés en el último mes**

|                                                                                                                       | Nunca                 | Casi nunca            | A veces               | Con bastante frecuencia | Muy a menudo          |
|-----------------------------------------------------------------------------------------------------------------------|-----------------------|-----------------------|-----------------------|-------------------------|-----------------------|
| 1. En el último mes, ¿con qué frecuencia se molestó por algo que sucedió inesperadamente?                             | <input type="radio"/> | <input type="radio"/> | <input type="radio"/> | <input type="radio"/>   | <input type="radio"/> |
| 2. En el último mes, ¿con qué frecuencia sintió que no podía controlar las cosas importantes en su vida?              | <input type="radio"/> | <input type="radio"/> | <input type="radio"/> | <input type="radio"/>   | <input type="radio"/> |
| 3. En el último mes, ¿con qué frecuencia se sintió nervioso y "estresado"?                                            | <input type="radio"/> | <input type="radio"/> | <input type="radio"/> | <input type="radio"/>   | <input type="radio"/> |
| 4. En el último mes, ¿con qué frecuencia se sintió confiado sobre su habilidad para manejar sus problemas personales? | <input type="radio"/> | <input type="radio"/> | <input type="radio"/> | <input type="radio"/>   | <input type="radio"/> |
| 5. En el último mes, ¿con qué frecuencia sintió que las cosas le iban bien?                                           | <input type="radio"/> | <input type="radio"/> | <input type="radio"/> | <input type="radio"/>   | <input type="radio"/> |
| 6. En el último mes, ¿con qué frecuencia se dio cuenta que no podía lidiar con todas las cosas que debía hacer?       | <input type="radio"/> | <input type="radio"/> | <input type="radio"/> | <input type="radio"/>   | <input type="radio"/> |
| 7. En el último mes, ¿con qué frecuencia ha podido controlar las irritaciones en su vida?                             | <input type="radio"/> | <input type="radio"/> | <input type="radio"/> | <input type="radio"/>   | <input type="radio"/> |
| 8. En el último mes, ¿con qué frecuencia sintió que tenía control sobre las cosas?                                    | <input type="radio"/> | <input type="radio"/> | <input type="radio"/> | <input type="radio"/>   | <input type="radio"/> |
| 9. En el último mes, ¿con qué frecuencia se enojó por cosas que estaban fuera de su control?                          | <input type="radio"/> | <input type="radio"/> | <input type="radio"/> | <input type="radio"/>   | <input type="radio"/> |
| 10. En el último mes, ¿con qué frecuencia sintió que las dificultades se acumulaban y no podía superarlas?            | <input type="radio"/> | <input type="radio"/> | <input type="radio"/> | <input type="radio"/>   | <input type="radio"/> |

11. Por favor, cuéntenos sobre sus sentimientos de estrés en el último mes:

---



**Sección 7 - Apoyo social**

|                                                                                 | Muy fuertement e en desacuerdo | Muy en desacuerdo     | Algo en desacuerdo    | Neutral               | Algo de acuerdo       | Muy de acuerdo        | Muy fuertement e en acuerdo |
|---------------------------------------------------------------------------------|--------------------------------|-----------------------|-----------------------|-----------------------|-----------------------|-----------------------|-----------------------------|
| 1. Hay una persona especial que está conmigo cuando lo necesito.                | <input type="radio"/>          | <input type="radio"/> | <input type="radio"/> | <input type="radio"/> | <input type="radio"/> | <input type="radio"/> | <input type="radio"/>       |
| 2. Hay una persona especial con quien puedo compartir mis alegrías y tristezas. | <input type="radio"/>          | <input type="radio"/> | <input type="radio"/> | <input type="radio"/> | <input type="radio"/> | <input type="radio"/> | <input type="radio"/>       |
| 3. Mi familia realmente trata de ayudarme.                                      | <input type="radio"/>          | <input type="radio"/> | <input type="radio"/> | <input type="radio"/> | <input type="radio"/> | <input type="radio"/> | <input type="radio"/>       |
| 4. Recibo la ayuda y el apoyo emocional que necesito de mi familia.             | <input type="radio"/>          | <input type="radio"/> | <input type="radio"/> | <input type="radio"/> | <input type="radio"/> | <input type="radio"/> | <input type="radio"/>       |
| 5. Tengo una persona especial que es una verdadera fuente de alivio para mí.    | <input type="radio"/>          | <input type="radio"/> | <input type="radio"/> | <input type="radio"/> | <input type="radio"/> | <input type="radio"/> | <input type="radio"/>       |
| 6. Mi familia realmente trata de ayudarme.                                      | <input type="radio"/>          | <input type="radio"/> | <input type="radio"/> | <input type="radio"/> | <input type="radio"/> | <input type="radio"/> | <input type="radio"/>       |
| 7. Puedo contar con mis amigos cuando las cosas salen mal.                      | <input type="radio"/>          | <input type="radio"/> | <input type="radio"/> | <input type="radio"/> | <input type="radio"/> | <input type="radio"/> | <input type="radio"/>       |
| 8. Puedo hablar sobre mis problemas con mi familia.                             | <input type="radio"/>          | <input type="radio"/> | <input type="radio"/> | <input type="radio"/> | <input type="radio"/> | <input type="radio"/> | <input type="radio"/>       |
| 9. Tengo amigos con quienes puedo compartir mis alegrías y tristezas.           | <input type="radio"/>          | <input type="radio"/> | <input type="radio"/> | <input type="radio"/> | <input type="radio"/> | <input type="radio"/> | <input type="radio"/>       |
| 10. Hay una persona especial en mi vida que se preocupa por mis sentimientos.   | <input type="radio"/>          | <input type="radio"/> | <input type="radio"/> | <input type="radio"/> | <input type="radio"/> | <input type="radio"/> | <input type="radio"/>       |
| 11. Mi familia está dispuesta a ayudarme a tomar decisiones.                    | <input type="radio"/>          | <input type="radio"/> | <input type="radio"/> | <input type="radio"/> | <input type="radio"/> | <input type="radio"/> | <input type="radio"/>       |
| 12. Puedo hablar sobre mis problemas con mis amigos.                            | <input type="radio"/>          | <input type="radio"/> | <input type="radio"/> | <input type="radio"/> | <input type="radio"/> | <input type="radio"/> | <input type="radio"/>       |

**Sección 8: Preguntas sobre la salud**

1. ¿Diría usted que, en general, su capacidad de sanar es...?

- Excelente  
 Muy buena  
 Buena  
 Regular  
 Mala

2. Ahora, con respecto a su salud física, lo que incluye enfermedad y lesión física, ¿cuántos días, en los últimos 30 días, no tuvo una buena salud física?

\_\_\_\_\_  
((cantidad de días))

3. Ahora, con respecto a su salud mental, lo que incluye estrés, depresión y problemas emocionales, ¿cuántos días, en los últimos 30 días, no tuvo una buena salud mental?

\_\_\_\_\_  
((cantidad de días))

4. En los últimos 30 días, ¿aproximadamente cuántos días su mala salud física o mental le impidió realizar sus actividades normales, como cuidar de sí mismo, trabajar o actividades recreativas?

\_\_\_\_\_  
((cantidad de días))

5. ¿Hubo algún momento en los últimos 12 meses que necesitó recibir atención médica (por ejemplo, ver a un médico), pero no pudo hacerlo debido al costo?

- Sí  
 No  
 No sabe

6. ¿Usted o alguien en su vivienda tienen una condición de salud grave como presión arterial alta, enfermedad cardíaca, enfermedad pulmonar, cáncer o diabetes? (marque todas las que correspondan)

- Sí, yo  
 Sí, alguien en mi vivienda  
 No, nadie  
 No sabe

7. ¿Cuál de las siguientes opciones aplican a usted (marque todas las que correspondan)?

- Actualmente estoy embarazada  
 Mi pareja actualmente está embarazada  
 Ni mi pareja ni yo estamos actualmente embarazados

8. ¿Le gustaría quedar embarazada o tener un hijo en el próximo año?

- Sí  
 No  
 No sabe

**Sección 9: Redes sociales**

**1. ¿Cuáles de las siguientes redes sociales usa? (Marque la mejor respuesta para cada una)**

|              | La uso todos los días | Algunas veces por semana | Algunas veces por mes | La uso muy poco       | No la uso nunca       |
|--------------|-----------------------|--------------------------|-----------------------|-----------------------|-----------------------|
| a. Facebook  | <input type="radio"/> | <input type="radio"/>    | <input type="radio"/> | <input type="radio"/> | <input type="radio"/> |
| b. Twitter   | <input type="radio"/> | <input type="radio"/>    | <input type="radio"/> | <input type="radio"/> | <input type="radio"/> |
| c. LinkedIn  | <input type="radio"/> | <input type="radio"/>    | <input type="radio"/> | <input type="radio"/> | <input type="radio"/> |
| d. Instagram | <input type="radio"/> | <input type="radio"/>    | <input type="radio"/> | <input type="radio"/> | <input type="radio"/> |
| e. WhatsApp  | <input type="radio"/> | <input type="radio"/>    | <input type="radio"/> | <input type="radio"/> | <input type="radio"/> |
| f. Snapchat  | <input type="radio"/> | <input type="radio"/>    | <input type="radio"/> | <input type="radio"/> | <input type="radio"/> |
| g. Reddit    | <input type="radio"/> | <input type="radio"/>    | <input type="radio"/> | <input type="radio"/> | <input type="radio"/> |

2. ¿Cómo ha cambiado su uso de redes sociales desde que comenzó la pandemia por coronavirus?

- Uso las redes sociales mucho más
- Uso las redes sociales un poco más
- No uso las redes sociales más que antes
- No sabe

2b. Por favor, explique cómo ha cambiado su uso de redes sociales desde que comenzó la pandemia por coronavirus:

\_\_\_\_\_

**Sección 10: Preguntas demográficas**

1. ¿Cuál es su edad actual, en años?

---

2. ¿Cómo describiría su trasfondo étnico?

---

4. ¿Se considera alguno de los siguientes? (marque todas las que correspondan) Mexicano Puertorriqueño Cubano

- Mexicano  
 Puertorriqueño  
 Cubano

4a. Si se considera parte de otra etnia hispana/latina que no mencionamos arriba, por favor describa:

---

4b. No me considero hispano o latino

- Verdadero  
 Falso

5. ¿Cuál de las siguientes opciones mejor describe su educación?

- No completó la secundaria  
 Completó la educación secundaria o el GED  
 Fue a la universidad pero no la completó  
 Se recibió de la universidad  
 Título de postgrado (MA, PhD, MD, etc.)

**6. ¿Cuál es su religión actual, si es religioso? Marque todas las que correspondan**

|                           | Sí                    | No                    | Prefiero no contestar |
|---------------------------|-----------------------|-----------------------|-----------------------|
| a. Cristiano              | <input type="radio"/> | <input type="radio"/> | <input type="radio"/> |
| b. Judío (judaísmo)       | <input type="radio"/> | <input type="radio"/> | <input type="radio"/> |
| c. Musulmán               | <input type="radio"/> | <input type="radio"/> | <input type="radio"/> |
| d. Budista                | <input type="radio"/> | <input type="radio"/> | <input type="radio"/> |
| e. Hindú                  | <input type="radio"/> | <input type="radio"/> | <input type="radio"/> |
| f. Ateo (no cree en Dios) | <input type="radio"/> | <input type="radio"/> | <input type="radio"/> |
| g. Otro                   | <input type="radio"/> | <input type="radio"/> | <input type="radio"/> |
| h. No sabe                | <input type="radio"/> | <input type="radio"/> | <input type="radio"/> |

6g. Otra religión, especifique

\_\_\_\_\_

7. Si vive en Estados Unidos, identifique su raza/etnia (marque todas las que correspondan)

- Nativo americano o nativo de Alaska
- Asiático
- Negro o afroamericano
- Nativo de Hawái
- Nativo de las Islas del Pacífico
- Caucásico
- Otro

7. Seleccione "otro", por favor especifique qué otra raza/etnia

\_\_\_\_\_

7. ¿Como cuál de las siguientes categorías se identifica?

- Oyente/no sordo
- Con problemas de audición
- sordo
- Sordo
- Sordociego

A los fines de este estudio, por favor utilice las siguientes definiciones.

Oyente/no sordo: Persona que no tiene pérdida de la audición;

Con problemas de audición: Persona que tiene una pérdida parcial

de la audición;

sordo: Persona que tiene pérdida de la audición;

Sordo: Persona que tiene pérdida de la audición y se identifica con

la cultura de los Sordos;

Sordociego: Persona con una combinación de pérdida de audición y con visión limitada o sin visión.

9. ¿Cuál de las siguientes opciones mejor describe su género?

- Masculino
- Femenino
- Otra opción

1 q9. Eligió "otra opción" para describir su género,  
2 por favor explique:  
3

4 \_\_\_\_\_

5 10. Se considera... (marque todas las que  
6 correspondan):  
7

- 8  Heterosexual
- 9  Gay
- 10  Lesbiana
- 11  Bisexual
- 12  Transgénero
- 13  No figura en la lista

14 10a. No figura en la lista, indíquelo  
15

16 \_\_\_\_\_

For peer review only

17  
18  
19  
20  
21  
22  
23  
24  
25  
26  
27  
28  
29  
30  
31  
32  
33  
34  
35  
36  
37  
38  
39  
40  
41  
42  
43  
44  
45  
46  
47  
48  
49  
50  
51  
52  
53  
54  
55  
56  
57  
58  
59  
60

1 **Sección 11: Pregunta final**  
2  
3  
4

5  
6 1. Por favor, comparta cualquier pensamiento adicional  
7 sobre el coronavirus y COVID-19 que tenga:  
8 \_\_\_\_\_  
9  
10  
11  
12  
13  
14  
15  
16  
17  
18  
19  
20  
21  
22  
23  
24  
25  
26  
27  
28  
29  
30  
31  
32  
33  
34  
35  
36  
37  
38  
39  
40  
41  
42  
43  
44  
45  
46  
47  
48  
49  
50  
51  
52  
53  
54  
55  
56  
57  
58  
59  
60

For peer review only

**Sección 12: Calidad de la encuesta**

**Ahora nos gustaría hacerle algunas preguntas sobre esta encuesta para mejorarla en el futuro. Si tiene alguna pregunta específica que le gustaría señalar, por favor, copie y pegue la pregunta en el campo de texto.**

1. En general, las preguntas en esta encuesta fueron "entendibles". Es decir, no tuvo que leer la pregunta más de una vez para entender qué se preguntaba.

Muy en desacuerdo  
 En desacuerdo  
 Ni de acuerdo ni en desacuerdo  
 De acuerdo  
 Muy de acuerdo

2. ¿Hubo alguna pregunta específica que le resultó particularmente difícil de entender? Si la respuesta es sí, por favor especifique (lo mejor que pueda)

\_\_\_\_\_

3. En general, el significado de las preguntas fue claro y directo

Muy en desacuerdo  
 En desacuerdo  
 Ni de acuerdo ni en desacuerdo  
 De acuerdo  
 Muy de acuerdo

4. ¿Hubo alguna pregunta específica cuyo significado no fue claro? Si la respuesta es sí, por favor especifique (lo mejor que pueda)

Sí  No

4a. Si la respuesta es sí, por favor especifique (lo mejor que pueda)

\_\_\_\_\_

5. Las escalas para responder las preguntas fueron apropiadas. Es decir, ¿siente que la escala le proporcionó una manera adecuada para responder?

Muy en desacuerdo  
 En desacuerdo  
 Ni de acuerdo ni en desacuerdo  
 De acuerdo  
 Muy de acuerdo

6. En su opinión, ¿alguna de las preguntas estaba escrita de tal manera que había SOLO una respuesta OBVIA para usted?

Sí  
 No

6b. Por favor, explique:

\_\_\_\_\_

¿Algún otro comentario que desee hacer acerca de este estudio?

\_\_\_\_\_

( )

Para más información sobre coronavirus y COVID-19, visite

<https://www.cdc.gov/coronavirus/2019-ncov/index.html>

<https://www.cdc.gov/>

<https://www.who.int/>



# Enquête mondiale sur le coronavirus

1  
2 Bienvenue ! Vous êtes invité(e) à participer à une enquête épidémiologique mondiale de l'Université de Rochester  
3 afin de nous aider à mieux comprendre les attitudes, convictions et connaissances relatives à des questions actuelles  
4 de santé publique, comme le coronavirus, le COVID-19 et d'autres maladies infectieuses, ainsi que les facteurs  
5 susceptibles d'y être liés. Si vous êtes âgé(e) d'au moins 18 ans et pouvez répondre à l'enquête en français, veuillez  
6 le faire ci-dessous !  
7

---

8  
9 LANGUAGE \_\_\_\_\_  
10  
11  
12  
13  
14  
15  
16  
17  
18  
19  
20  
21  
22  
23  
24  
25  
26  
27  
28  
29  
30  
31  
32  
33  
34  
35  
36  
37  
38  
39  
40  
41  
42  
43  
44  
45  
46  
47  
48  
49  
50  
51  
52  
53  
54  
55  
56  
57  
58  
59  
60

For peer review only

SCHOOL OF MEDICINE AND DENTISTRY

Department of Obstetrics & Gynecology

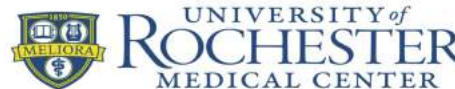

**Enquête mondiale sur le coronavirus : Opinions et pratiques**

**Enquêteurs principaux : Timothy Dye, PhD et Eva Pressman, MD**

Ce formulaire contient une étude conduite par une faculté de l'École de médecine et de dentisterie de l'Université de Rochester.

L'objectif de cette étude est de mieux comprendre les attitudes, convictions et connaissances relatives à des questions actuelles de santé publique, comme le coronavirus et d'autres maladies infectieuses, ainsi que les facteurs susceptibles d'y être liés. L'étude contient des questions relatives à vos idées et expériences en matière de coronavirus et de COVID-19, de santé physique et mentale, de stress et de soutien social, ainsi que des questions à caractère démographique. Vous pouvez passer n'importe quelle question.

Si vous décidez de participer à cette étude, il vous sera demandé de répondre à un questionnaire par le biais d'un lien disponible sur Internet. Il vous faudra entre 20 et 40 minutes pour compléter l'enquête. Nous estimons que 7 000 personnes environ participeront à cette étude.

Les risques liés à cette participation sont minimes. Certaines questions peuvent être troublantes ou embarrassantes. Vous pouvez passer les questions auxquelles vous ne voulez pas répondre. Afin de protéger la confidentialité des données, celles-ci seront transmises dans un format crypté (que seul le personnel autorisé pourra lire). Aucun bénéfice n'est escompté.

Vous ne recevrez aucune compensation pour votre participation à cette enquête.

L'Université de Rochester mettra tout en œuvre pour préserver la confidentialité de vos informations. Les résultats de la recherche pourront être présentés lors de réunions ou dans des publications, mais ne permettront pas l'identification des personnes qui y auront répondu.

**Votre participation à cette étude se fait sur base totalement volontaire.** Vous n'êtes pas tenu(e) d'y participer et pouvez interrompre le questionnaire à tout moment. Si vous décidez de l'interrompre, nous ne pourrions pas supprimer vos informations, car nous ne collectons aucune donnée d'identification et ne pourrions pas retrouver et supprimer vos réponses.

L'Université de Rochester reçoit un paiement de la Fondation Mae Stone Goode pour la réalisation de cette étude de recherche.

Si vous avez des questions concernant cette recherche, n'hésitez pas à prendre contact avec le Dr Timothy Dye par e-mail à [tim\\_dye@urmc.rochester.edu](mailto:tim_dye@urmc.rochester.edu).

N'hésitez pas à prendre contact avec le Comité de révision des sujets de recherche (Research Subjects Review Board) de l'Université de Rochester au 265 Crittenden Blvd., CU 420315, Rochester, NY 14642, téléphone +1 (585) 276-0005 ou +1 (877) 449-4441 dans les cas suivants :

- Vous désirez parler à une personne qui ne fait pas partie du personnel de recherche de vos droits en tant que sujet de recherche ;
- Vous désirez faire part de vos inquiétudes au sujet de la recherche.

RSRB STUDY00004825

Version Date: April 28, 2020

RSRB Approval Date: 4/28/2020

1 Enque  
2 ^  
3 te mondiale sur le coronavirus : Opinions et pratiques  
4  
5 Enque  
6 ^  
7 teurs principaux : Timothy Dye, PhD et Eva Pressman, MD  
8 Ce formulaire contient une  
9 e  
10 /  
11 tude conduite par une  
12 faculte  
13 /  
14 de  
15 l'E  
16 /  
17 cole de  
18 me  
19 decine et de dentisterie de  
20  
21 l'Universite  
22 /  
23 de Rochester.  
24  
25 L'objectif de cette  
26 e  
27 /  
28 tude est de mieux comprendre les attitudes, convictions et connaissances relatives  
29 a  
30 /  
31 des questions actuelles de  
32 sante  
33 /  
34 publique, comme le coronavirus et d'autres maladies infectieuses, ainsi que les facteurs susceptibles d'y  
35 e  
36 ^  
37 tre  
38 lie  
39 /  
40 s.  
41 L'e  
42 /  
43 tude contient des questions relatives  
44 a  
45 /  
46 vos  
47 ide  
48 /  
49 es et  
50 expe  
51 /  
52 riences en  
53 matie  
54 /  
55 re de coronavirus et de COVID-19, de  
56 sante  
57 /  
58 physique et mentale, de stress et de soutien social, ainsi que des questions  
59 a  
60 /  
caracte  
/  
re  
de  
/

For peer review only

Si vous  
de  
1 cidez de participer  
2 a  
3  
4 cette  
5 e  
6  
7 tude, il vous sera  
8 demande  
9  
10 de  
11 re  
12  
13 pondre  
14 a  
15 un questionnaire par le biais d'un lien disponible sur Internet. Il vous faudra entre 15 et 25 minutes pour  
16 comple  
17  
18 ter  
19 l'enque  
20  
21 te. Nous estimons que 7 000 personnes environ participeront  
22 a  
23  
24 cette  
25 e  
26  
27 tude.  
28  
29 Les risques  
30 lie  
31  
32 s  
33 a  
34 cette participation sont minimales. Certaines questions peuvent  
35 e  
36  
37 tre troublantes ou embarrassantes. Vous pouvez passer les questions auxquelles vous ne voulez pas  
38 re  
39  
40 pondre. Afin de  
41 prote  
42  
43 ger la  
44 confidentialite  
45  
46 des  
47 donne  
48  
49 es, celles-ci seront transmises dans un format  
50 crypte  
51  
52 (que seul le personnel  
53 autorite  
54  
55 pourra lire). Aucun  
56 be  
57  
58 ne  
59  
60 fice n'est  
escompte

1 cette  
2 enque  
3 te.  
4  
5 L'Universite  
6  
7 de Rochester mettra tout en œuvre pour  
8 pre  
9  
10 server la  
11 confidentialite  
12  
13 de vos informations. Les  
14 re  
15 sultats de la recherche pourront  
16 e  
17 tre  
18 pre  
19 sente  
20 s lors de  
21 re  
22 unions ou dans des publications, mais ne permettront pas l'identification des personnes qui y auront  
23 re  
24 pondu.  
25  
26 Votre participation  
27 a  
28 cette  
29 e  
30 tude se fait sur base totalement volontaire. Vous  
31 n'e  
32 tes pas tenu(e) d'y participer et pouvez interrompre le questionnaire  
33 a  
34 tout moment. Si vous  
35 de  
36 cidez de l'interrompre, nous ne pourrons pas supprimer vos informations, car nous ne collectons aucune  
37 donne  
38 e d'identification et ne pourrions pas retrouver et supprimer vos  
39 re  
40 penses.  
41  
42 L'Universite  
43 de Rochester  
44 rec  
45 oit un paiement de la Fondation Mae Stone Goode pour la  
46 re  
47 alisation de cette  
48 e  
49 tude de recherche.

1 sitez pas

2 a

3 prendre contact avec le Dr Timothy Dye par e-mail

4 a

5 tim\_dye@urmc.rochester.edu.

6 N'he

7 sitez pas

8 a

9 prendre contact avec le

10 Comite

11 de

12 re

13 vision des sujets de recherche (Research Subjects Review Board) de

14 l'Universite

15 de Rochester au 265 Crittenden Blvd., CU 420315, Rochester, NY 14642,

16 te

17 le

18 phone +1 (585) 276-0005 ou +1 (877) 449-4441 dans les cas suivants :

19 • Vous

20 de

21 sirez parler

22 a

23 une personne qui ne fait pas partie du personnel de recherche de vos droits en tant que sujet de recherche ;

24 • Vous

25 de

26 sirez faire part de vos

27 inquietudes

28 au sujet de la recherche.

29 Voulez-vous poursuivre le questionnaire ?

30  Oui

31  No

**Section 1 : Questions relatives au pays**

1  
2  
3  
4  
5  
6  
7  
8  
9  
10  
11  
12  
13  
14  
15  
16  
17  
18  
19  
20  
21  
22  
23  
24  
25  
26  
27  
28  
29  
30  
31  
32  
33  
34  
35  
36  
37  
38  
39  
40  
41  
42  
43  
44  
45  
46  
47  
48  
49  
50  
51  
52  
53  
54  
55  
56  
57  
58  
59  
60

For peer review only

1 1. Dans quel pays vivez-vous ?

- 2  Afghanistan
- 3  Afrique du Sud
- 4  Albanie
- 5  Algérie
- 6  Allemagne
- 7  Andorre
- 8  Angola
- 9  Anguilla
- 10  Antarctique [a]
- 11  Antigua-et-Barbuda
- 12  Arabie saoudite
- 13  Argentin
- 14  Arménie
- 15  Aruba
- 16  Australie [b]
- 17  Autriche
- 18  Azerbaïdjan
- 19  Bahamas (la)
- 20  Bahrain
- 21  Bangladesh
- 22  Barbade
- 23  Belgique
- 24  Belize
- 25  Bénin
- 26  Bhoutan
- 27  Biélorussie
- 28  Bolivie (État plurinational de)
- 29  Bonaire
- 30  Bosnie-herzégovine
- 31  Botswana
- 32  Brésil
- 33  Brunéi Darussalam [e]
- 34  Bulgarie
- 35  Burkina faso
- 36  Burundi
- 37  Cambodge
- 38  Cameroun
- 39  Canada
- 40  Cap-Vert [f]
- 41  Chili
- 42  Chine
- 43  Chypre
- 44  Colombie
- 45  Comores (las)
- 46  Congo (le) [g]
- 47  Congo (République démocratique du)
- 48  Corée (République de) [p]
- 49  Corée (République populaire démocratique de) [o]
- 50  Costa rica
- 51  Côte d'Ivoire [h]
- 52  Croatie
- 53  Cuba
- 54  Curaçao
- 55  Danemark
- 56  Djibouti
- 57  Dominica
- 58  Egypte
- 59  El salvador
- 60  Emirats Arabes Unis (ei)
- Equateur
- Érythrée
- Espagne
- Estonie
- Eswatini [j]
- États-Unis d'Amérique (les)
- Ethiopie
- Fédération de Russie (la) [v]
- Fidji
- Finlande



1  
2  
3  
4  
5  
6  
7  
8  
9  
10  
11  
12  
13  
14  
15  
16  
17  
18  
19  
20  
21  
22  
23  
24  
25  
26  
27  
28  
29  
30  
31  
32  
33  
34  
35  
36  
37  
38  
39  
40  
41  
42  
43  
44  
45  
46  
47  
48  
49  
50  
51  
52  
53  
54  
55  
56  
57  
58  
59  
60

- France [l]
- Gabon
- Gambie
- Géorgie
- Géorgie du Sud et îles Sandwich du Sud
- Ghana
- Gibraltar
- Grèce
- Grenade
- Groenland
- Guadalupe
- Guam
- Guatemala
- Guernsey
- Guinée
- Guinée équatoriale
- Guinée-bissau
- Guyane française
- Guyanes
- Honduras
- Hong kong
- Hongrie
- Île bouvet
- Île d'ascencion
- Ile de Man
- Île de Noël
- Île norfolk
- Îles caïmans
- Îles Cocos (Keeling) (les)
- Îles cook
- Îles d'aland
- Îles des Bermudes
- Îles Falkland (les) [Malouines] [k]
- Îles féroé
- Îles Heard et mcdonald
- Îles Mariannes du Nord
- Îles marshall
- Îles Mineures Éloignées des États-Unis (les) [ac]
- Îles salomon
- Îles Turques et Caïques (la)
- Îles Vierges (États-Unis,) [ag]
- Îles Vierges britanniques [af]
- Inde
- Indonésie
- Irak
- Iran (République islamique d ')
- Irlande
- Islande
- Israël
- Italie
- Jamaïque
- Jan mayen
- Japon
- Jersey
- Jordanie
- Kazakhstan
- Kenya
- Kiribati
- Koweït
- Kirgizstan
- Lesotho
- Lettonie
- Liban
- Libéria
- Libye
- Liechtenstein
- Lituanie
- Luxembourg
- Macao [r]
- Macédoine du Nord [s]

1  
2  
3  
4  
5  
6  
7  
8  
9  
10  
11  
12  
13  
14  
15  
16  
17  
18  
19  
20  
21  
22  
23  
24  
25  
26  
27  
28  
29  
30  
31  
32  
33  
34  
35  
36  
37  
38  
39  
40  
41  
42  
43  
44  
45  
46  
47  
48  
49  
50  
51  
52  
53  
54  
55  
56  
57  
58  
59  
60

- Madagascar
- Malaisie
- Malawien
- Maldives
- Mali
- Malte
- Maroc
- Martinique
- Mauricio
- Mauritanie
- Mayotte
- Mexique
- Micronésie (États fédérés de)
- Moldova (République de)
- Monaco
- Mongolie
- Monténégro
- Montserrat
- Mozambique
- Myanmar [t]
- Namibie
- Nauru
- Népal
- Nicaragua
- Niger (la)
- Nigeria
- Niue
- Norvège
- Nouvelle calédonie
- Nouvelle-zélande
- Oman
- Ouganda
- Ouzbékistan
- Pakistan
- Palau
- Palestine, État de
- Panama
- Papouasie-nouvelle-guinée
- Paraguay
- Pays-Bas (la)
- Pérou
- Philippines
- Pitcairn [u]
- Pologne
- Polynésie française
- Portugal
- Puerto rico
- Qatar
- République arabe syrienne (la) [x]
- République centrafricaine
- République démocratique populaire lao (la) [q]
- République dominicaine
- République tchèque [i]
- Réunion
- Roumanie
- Royaume-Uni de Grande-Bretagne et d'Irlande du Nord (il)
- Rwanda
- Saba
- Sahara occidental [ah]
- Saint Martin (partie française)
- Saint Pierre et Miquelon
- Saint Vincent et les Grenadines
- Saint-barthélemy
- Saint-Kitts-et-Nevis
- Saint-marin
- Saint-Siège (le) [n]
- Sainte-hélène
- Sainte-Lucie
- Samoa
- Samoa américaines

1  
2  
3  
4  
5  
6  
7  
8  
9  
10  
11  
12  
13  
14  
15  
16  
17  
18  
19  
20  
21  
22  
23  
24  
25  
26  
27  
28  
29  
30  
31  
32  
33  
34  
35  
36  
37  
38  
39  
40  
41  
42  
43  
44  
45  
46  
47  
48  
49  
50  
51  
52  
53  
54  
55  
56  
57  
58  
59  
60

- Sant'Eustachio
- Sao Tomé et Príncipe
- Sénégal
- Serbie
- Seychelles
- Sierra leone
- Singapour
- Sint Maarten (partie néerlandaise)
- Slovaquie
- Slovénie
- Somalie
- Soudan
- Soudan du Sud
- Sri lanka
- Suède
- Suisse
- Suriname
- Svalbard
- Taïwan (Province de Chine) [e]
- Tajikistan
- Tanzanie, République-Unie de
- Tchad
- Territoire britannique de l'océan Indien (el)
- Territoires français du Sud (les) [m]
- Thaïlande
- Timor oriental [aa]
- Togo
- Tokelau
- Tonga
- Trinidad et Tobago
- Tristan da Cunha
- Tunisia
- Turkmenistan
- Turquie
- Tuvalu
- Ukraine
- Uruguay
- Vanuatu
- Venezuela (République bolivarienne du)
- Vietnam [ae]
- Wallis et Futuna
- Yémen
- Zambie
- Zimbabwe
- Un autre

---

Si vous vivez dans un autre pays, veuillez préciser

---

1 1b. Pour les résidents des États-Unis, dans quel  
2 État vivez-vous ?  
3

- 4  New York
- 5  Alabama
- 6  Alaska
- 7  Arizona
- 8  Arkansas
- 9  California
- 10  Colorado
- 11  Connecticut
- 12  Delaware
- 13  Florida
- 14  Georgia
- 15  Hawaii
- 16  Idaho
- 17  Illinois
- 18  Indiana
- 19  Iowa
- 20  Kansas
- 21  Kentucky
- 22  Louisiana
- 23  Maine
- 24  Maryland
- 25  Massachusetts
- 26  Michigan
- 27  Minnesota
- 28  Mississippi
- 29  Missouri
- 30  Montana
- 31  Nebraska
- 32  Nevada
- 33  New Hampshire
- 34  New Jersey
- 35  New Mexico
- 36  North Carolina
- 37  North Dakota
- 38  Ohio
- 39  Oklahoma
- 40  Oregon
- 41  Pennsylvania
- 42  Rhode Island
- 43  South Carolina
- 44  South Dakota
- 45  Tennessee
- 46  Texas
- 47  Utah
- 48  Vermont
- 49  Virginia
- 50  Washington
- 51  West Virginia
- 52  Wisconsin
- 53  Wyoming

1 1c. Pour les résidents de l'Inde, dans quel État  
2 vivez-vous ?  
3

- 4  IN-AP = Andhra Pradesh
- 5  IN-AR = Arunachal Pradesh
- 6  IN-AS = Assam
- 7  IN-BR = Bihar
- 8  IN-CT = Chhattisgarh
- 9  IN-GA = Goa
- 10  IN-GJ = Gujarat
- 11  IN-HR = Haryana
- 12  IN-HP = Himachal Pradesh
- 13  IN-JH = Jharkhand
- 14  IN-KA = Karnataka
- 15  IN-KL = Kerala
- 16  IN-MP = Madhya Pradesh
- 17  IN-MH = Maharashtra
- 18  IN-MN = Manipur
- 19  IN-ML = Meghalaya
- 20  IN-MZ = Mizoram
- 21  IN-NL = Nagaland
- 22  IN-OR = Odisha
- 23  IN-PB = Punjab
- 24  IN-RJ = Rajasthan
- 25  IN-SK = Sikkim
- 26  IN-TN = Tamil Nadu
- 27  IN-TG = Telangana
- 28  IN-TR = Tripura
- 29  IN-UT = Uttarakhand
- 30  IN-UP = Uttar Pradesh
- 31  IN-WB = West Bengal
- 32  IN-AN = Andaman and Nicobar Islands
- 33  IN-CH = Chandigarh
- 34  IN-DN = Dadra and Nagar Haveli
- 35  IN-DD = Daman and Diu
- 36  IN-DL = Delhi
- 37  IN-JK = Jammu and Kashmir
- 38  IN-LA = Ladakh
- 39  IN-LD = Lakshadweep
- 40  IN-PY = Puducherry

For peer review only

1 2. Quel est votre pays de naissance ?

- 2  Afghanistan
- 3  Afrique du Sud
- 4  Albanie
- 5  Algérie
- 6  Allemagne
- 7  Andorre
- 8  Angola
- 9  Anguilla
- 10  Antarctique [a]
- 11  Antigua-et-Barbuda
- 12  Arabie saoudite
- 13  Argentin
- 14  Arménie
- 15  Aruba
- 16  Australie [b]
- 17  Autriche
- 18  Azerbaïdjan
- 19  Bahamas (la)
- 20  Bahrain
- 21  Bangladesh
- 22  Barbade
- 23  Belgique
- 24  Belize
- 25  Bénin
- 26  Bhoutan
- 27  Biélorussie
- 28  Bolivie (État plurinational de)
- 29  Bonaire
- 30  Bosnie-herzégovine
- 31  Botswana
- 32  Brésil
- 33  Brunéi Darussalam [e]
- 34  Bulgarie
- 35  Burkina faso
- 36  Burundi
- 37  Cambodge
- 38  Cameroun
- 39  Canada
- 40  Cap-Vert [f]
- 41  Chili
- 42  Chine
- 43  Chypre
- 44  Colombie
- 45  Comores (las)
- 46  Congo (le) [g]
- 47  Congo (République démocratique du)
- 48  Corée (République de) [p]
- 49  Corée (République populaire démocratique de) [o]
- 50  Costa rica
- 51  Côte d'Ivoire [h]
- 52  Croatie
- 53  Cuba
- 54  Curaçao
- 55  Danemark
- 56  Djibouti
- 57  Dominica
- 58  Egypte
- 59  El salvador
- 60  Emirats Arabes Unis (ei)
- Equateur
- Érythrée
- Espagne
- Estonie
- Eswatini [j]
- États-Unis d'Amérique (les)
- Ethiopie
- Fédération de Russie (la) [v]
- Fidji
- Finlande

1  
2  
3  
4  
5  
6  
7  
8  
9  
10  
11  
12  
13  
14  
15  
16  
17  
18  
19  
20  
21  
22  
23  
24  
25  
26  
27  
28  
29  
30  
31  
32  
33  
34  
35  
36  
37  
38  
39  
40  
41  
42  
43  
44  
45  
46  
47  
48  
49  
50  
51  
52  
53  
54  
55  
56  
57  
58  
59  
60

- France [l]
- Gabon
- Gambie
- Géorgie
- Géorgie du Sud et îles Sandwich du Sud
- Ghana
- Gibraltar
- Grèce
- Grenade
- Groenland
- Guadalupe
- Guam
- Guatemala
- Guernsey
- Guinée
- Guinée équatoriale
- Guinée-bissau
- Guyane française
- Guyanes
- Honduras
- Hong kong
- Hongrie
- Île bouvet
- Île d'ascencion
- Ile de Man
- Île de Noël
- Île norfolk
- Îles caïmans
- Îles Cocos (Keeling) (les)
- Îles cook
- Îles d'aland
- Îles des Bermudes
- Îles Falkland (les) [Malouines] [k]
- Îles féroé
- Îles Heard et mcdonald
- Îles Mariannes du Nord
- Îles marshall
- Îles Mineures Éloignées des États-Unis (les) [ac]
- Îles salomon
- Îles Turques et Caïques (la)
- Îles Vierges (États-Unis,) [ag]
- Îles Vierges britanniques [af]
- Inde
- Indonésie
- Irak
- Iran (République islamique d ')
- Irlande
- Islande
- Israël
- Italie
- Jamaïque
- Jan mayen
- Japon
- Jersey
- Jordanie
- Kazakhstan
- Kenya
- Kiribati
- Koweït
- Kyrgyzstan
- Lesotho
- Lettonie
- Liban
- Libéria
- Libye
- Liechtenstein
- Lituanie
- Luxembourg
- Macao [r]
- Macédoine du Nord [s]

1  
2  
3  
4  
5  
6  
7  
8  
9  
10  
11  
12  
13  
14  
15  
16  
17  
18  
19  
20  
21  
22  
23  
24  
25  
26  
27  
28  
29  
30  
31  
32  
33  
34  
35  
36  
37  
38  
39  
40  
41  
42  
43  
44  
45  
46  
47  
48  
49  
50  
51  
52  
53  
54  
55  
56  
57  
58  
59  
60

- Madagascar
- Malaisie
- Malawien
- Maldives
- Mali
- Malte
- Maroc
- Martinique
- Mauricio
- Mauritanie
- Mayotte
- Mexique
- Micronésie (États fédérés de)
- Moldova (République de)
- Monaco
- Mongolie
- Monténégro
- Montserrat
- Mozambique
- Myanmar [t]
- Namibie
- Nauru
- Népal
- Nicaragua
- Niger (la)
- Nigeria
- Niue
- Norvège
- Nouvelle calédonie
- Nouvelle-zélande
- Oman
- Ouganda
- Ouzbékistan
- Pakistan
- Palau
- Palestine, État de
- Panama
- Papouasie-nouvelle-guinée
- Paraguay
- Pays-Bas (la)
- Pérou
- Philippines
- Pitcairn [u]
- Pologne
- Polynésie française
- Portugal
- Puerto rico
- Qatar
- République arabe syrienne (la) [x]
- République centrafricaine
- République démocratique populaire lao (la) [q]
- République dominicaine
- République tchèque [i]
- Réunion
- Roumanie
- Royaume-Uni de Grande-Bretagne et d'Irlande du Nord (il)
- Rwanda
- Saba
- Sahara occidental [ah]
- Saint Martin (partie française)
- Saint Pierre et Miquelon
- Saint Vincent et les Grenadines
- Saint-barthélemy
- Saint-Kitts-et-Nevis
- Saint-marin
- Saint-Siège (le) [n]
- Sainte-hélène
- Sainte-Lucie
- Samoa
- Samoa américaines



1  
2  
3  
4  
5  
6  
7  
8  
9  
10  
11  
12  
13  
14  
15  
16  
17  
18  
19  
20  
21  
22  
23  
24  
25  
26  
27  
28  
29  
30  
31  
32  
33  
34  
35  
36  
37  
38  
39  
40  
41  
42  
43  
44  
45  
46  
47  
48  
49  
50  
51  
52  
53  
54  
55  
56  
57  
58  
59  
60

- Sant'Eustachio
- Sao Tomé et Príncipe
- Sénégal
- Serbie
- Seychelles
- Sierra leone
- Singapour
- Sint Maarten (partie néerlandaise)
- Slovaquie
- Slovénie
- Somalie
- Soudan
- Soudan du Sud
- Sri lanka
- Suède
- Suisse
- Suriname
- Svalbard
- Taïwan (Province de Chine) [e]
- Tajikistan
- Tanzanie, République-Unie de
- Tchad
- Territoire britannique de l'océan Indien (el)
- Territoires français du Sud (les) [m]
- Thaïlande
- Timor oriental [aa]
- Togo
- Tokelau
- Tonga
- Trinidad et Tobago
- Tristan da Cunha
- Tunisia
- Turkmenistan
- Turquie
- Tuvalu
- Ukraine
- Uruguay
- Vanuatu
- Venezuela (République bolivarienne du)
- Vietnam [ae]
- Wallis et Futuna
- Yémen
- Zambie
- Zimbabwe
- Un autre

---

Si vous êtes né(e) dans un autre pays, veuillez préciser :

---

## Section 2 : Comportements en matière de santé

Chaque point ci-dessous est une affirmation concernant votre santé avec laquelle vous pouvez être d'accord ou pas d'accord. Cette section sert à évaluer vos croyances personnelles ; il n'y a pas de bonnes ou de mauvaises réponses. Veuillez nous dire dans quelle mesure vous êtes d'accord ou pas d'accord avec chaque affirmation.

|                                                                                             | Pas du tout d'accord  | Pas d'accord          | Ni d'accord, ni pas d'accord | D'accord              | Tout à fait d'accord  |
|---------------------------------------------------------------------------------------------|-----------------------|-----------------------|------------------------------|-----------------------|-----------------------|
| 1. Si je suis malade, mon propre comportement détermine la rapidité de mon rétablissement.  | <input type="radio"/> | <input type="radio"/> | <input type="radio"/>        | <input type="radio"/> | <input type="radio"/> |
| 2. Quoi que je fasse, si je dois tomber malade, je tomberai malade.                         | <input type="radio"/> | <input type="radio"/> | <input type="radio"/>        | <input type="radio"/> | <input type="radio"/> |
| 3. Être en contact régulier avec mon médecin est le meilleur moyen de ne pas tomber malade. | <input type="radio"/> | <input type="radio"/> | <input type="radio"/>        | <input type="radio"/> | <input type="radio"/> |
| 4. La plupart des éléments qui ont une influence sur ma santé se produisent par hasard.     | <input type="radio"/> | <input type="radio"/> | <input type="radio"/>        | <input type="radio"/> | <input type="radio"/> |
| 5. Lorsque je ne me sens pas bien, je dois consulter un professionnel de la santé qualifié. | <input type="radio"/> | <input type="radio"/> | <input type="radio"/>        | <input type="radio"/> | <input type="radio"/> |
| 6. Je contrôle ma santé.                                                                    | <input type="radio"/> | <input type="radio"/> | <input type="radio"/>        | <input type="radio"/> | <input type="radio"/> |
| 7. Ma famille exerce une forte influence sur mon état de santé.                             | <input type="radio"/> | <input type="radio"/> | <input type="radio"/>        | <input type="radio"/> | <input type="radio"/> |
| 8. Lorsque je tombe malade, c'est de ma faute.                                              | <input type="radio"/> | <input type="radio"/> | <input type="radio"/>        | <input type="radio"/> | <input type="radio"/> |
| 9. La chance joue un grand rôle dans la vitesse à laquelle je me rétablis.                  | <input type="radio"/> | <input type="radio"/> | <input type="radio"/>        | <input type="radio"/> | <input type="radio"/> |
| 10. Les professionnels de la santé contrôlent mon état de santé.                            | <input type="radio"/> | <input type="radio"/> | <input type="radio"/>        | <input type="radio"/> | <input type="radio"/> |
| 11. Si je suis en bonne santé, c'est surtout une question de chance.                        | <input type="radio"/> | <input type="radio"/> | <input type="radio"/>        | <input type="radio"/> | <input type="radio"/> |
| 12. Le facteur qui a le plus d'influence sur ma santé est ce que je fais.                   | <input type="radio"/> | <input type="radio"/> | <input type="radio"/>        | <input type="radio"/> | <input type="radio"/> |

- |    |                                  |                       |                       |                       |                       |                       |
|----|----------------------------------|-----------------------|-----------------------|-----------------------|-----------------------|-----------------------|
| 1  | 13. Si je prends soin de moi, je | <input type="radio"/> |
| 2  | peux éviter de tomber malade.    |                       |                       |                       |                       |                       |
| 3  | 14. Lorsque je me rétablis après | <input type="radio"/> |
| 4  | avoir été malade, c'est          |                       |                       |                       |                       |                       |
| 5  | principalement parce que         |                       |                       |                       |                       |                       |
| 6  | d'autres personnes (par          |                       |                       |                       |                       |                       |
| 7  | exemple, les médecins, les       |                       |                       |                       |                       |                       |
| 8  | infirmiers, ma famille ou mes    |                       |                       |                       |                       |                       |
| 9  | amis) ont bien pris soin de moi. |                       |                       |                       |                       |                       |
| 10 |                                  |                       |                       |                       |                       |                       |
| 11 |                                  |                       |                       |                       |                       |                       |
| 12 | 15. Quoi que je fasse, je suis   | <input type="radio"/> |
| 13 | susceptible de tomber malade.    |                       |                       |                       |                       |                       |
| 14 |                                  |                       |                       |                       |                       |                       |
| 15 | 16. S'il doit en être ainsi, je  | <input type="radio"/> |
| 16 | resterai en bonne santé.         |                       |                       |                       |                       |                       |
| 17 |                                  |                       |                       |                       |                       |                       |
| 18 | 17. Si je prends les mesures     | <input type="radio"/> |
| 19 | adéquates, je peux rester en     |                       |                       |                       |                       |                       |
| 20 | bonne santé.                     |                       |                       |                       |                       |                       |
| 21 |                                  |                       |                       |                       |                       |                       |
| 22 | 18. En ce qui concerne ma        | <input type="radio"/> |
| 23 | santé, je ne peux faire que ce   |                       |                       |                       |                       |                       |
| 24 | que mon médecin me dit de        |                       |                       |                       |                       |                       |
| 25 | faire.                           |                       |                       |                       |                       |                       |
| 26 |                                  |                       |                       |                       |                       |                       |
| 27 |                                  |                       |                       |                       |                       |                       |
| 28 |                                  |                       |                       |                       |                       |                       |
| 29 |                                  |                       |                       |                       |                       |                       |
| 30 |                                  |                       |                       |                       |                       |                       |
| 31 |                                  |                       |                       |                       |                       |                       |
| 32 |                                  |                       |                       |                       |                       |                       |
| 33 |                                  |                       |                       |                       |                       |                       |
| 34 |                                  |                       |                       |                       |                       |                       |
| 35 |                                  |                       |                       |                       |                       |                       |
| 36 |                                  |                       |                       |                       |                       |                       |
| 37 |                                  |                       |                       |                       |                       |                       |
| 38 |                                  |                       |                       |                       |                       |                       |
| 39 |                                  |                       |                       |                       |                       |                       |
| 40 |                                  |                       |                       |                       |                       |                       |
| 41 |                                  |                       |                       |                       |                       |                       |
| 42 |                                  |                       |                       |                       |                       |                       |
| 43 |                                  |                       |                       |                       |                       |                       |
| 44 |                                  |                       |                       |                       |                       |                       |
| 45 |                                  |                       |                       |                       |                       |                       |
| 46 |                                  |                       |                       |                       |                       |                       |
| 47 |                                  |                       |                       |                       |                       |                       |
| 48 |                                  |                       |                       |                       |                       |                       |
| 49 |                                  |                       |                       |                       |                       |                       |
| 50 |                                  |                       |                       |                       |                       |                       |
| 51 |                                  |                       |                       |                       |                       |                       |
| 52 |                                  |                       |                       |                       |                       |                       |
| 53 |                                  |                       |                       |                       |                       |                       |
| 54 |                                  |                       |                       |                       |                       |                       |
| 55 |                                  |                       |                       |                       |                       |                       |
| 56 |                                  |                       |                       |                       |                       |                       |
| 57 |                                  |                       |                       |                       |                       |                       |
| 58 |                                  |                       |                       |                       |                       |                       |
| 59 |                                  |                       |                       |                       |                       |                       |
| 60 |                                  |                       |                       |                       |                       |                       |

For peer review only

**Section 3 - Croyances relatives au coronavirus****1. Selon vous, les experts de la santé publique ont-ils recommandé ces mesures pour ralentir la propagation du coronavirus ?**

|                                                                    | Oui, recommandé       | Non, pas recommandé   | Je ne sais pas        |
|--------------------------------------------------------------------|-----------------------|-----------------------|-----------------------|
| a. Se laver fréquemment les mains                                  | <input type="radio"/> | <input type="radio"/> | <input type="radio"/> |
| b. Faire bouillir l'eau avant de la boire                          | <input type="radio"/> | <input type="radio"/> | <input type="radio"/> |
| c. Faire porter des masques aux personnes en bonne santé en public | <input type="radio"/> | <input type="radio"/> | <input type="radio"/> |
| d. Éviter les grands rassemblements de personnes                   | <input type="radio"/> | <input type="radio"/> | <input type="radio"/> |
| e. Utiliser de l'antimoustique                                     | <input type="radio"/> | <input type="radio"/> | <input type="radio"/> |
| f. Rester chez soi si l'on se sent malade                          | <input type="radio"/> | <input type="radio"/> | <input type="radio"/> |

g. Autres recommandations

\_\_\_\_\_

**2. Selon vous, le coronavirus se transmet-il ou se propage-t-il par les moyens suivants ?**

Oui, transmis par ce moyen      Non, pas transmis par ce moyen      Je ne sais pas

- |                                                                                                     |                       |                       |                       |
|-----------------------------------------------------------------------------------------------------|-----------------------|-----------------------|-----------------------|
| a. Être en contact rapproché avec une personne infectée                                             | <input type="radio"/> | <input type="radio"/> | <input type="radio"/> |
| b. Toucher des surfaces contenant de petites quantités de fluides corporels d'une personne infectée | <input type="radio"/> | <input type="radio"/> | <input type="radio"/> |
| c. Se faire piquer par un moustique                                                                 | <input type="radio"/> | <input type="radio"/> | <input type="radio"/> |
| d. Par voie génétique                                                                               | <input type="radio"/> | <input type="radio"/> | <input type="radio"/> |

e. Par quelles autres voies le coronavirus se transmet-il ou se propage-t-il ? Veuillez expliquer.

\_\_\_\_\_

**3. Veuillez nous dire si vous pensez que les éléments suivants sont des symptômes courants d'une infection au coronavirus (COVID-19)**

|                                    | Oui, c'est un symptôme | Non, ce n'est pas un symptôme | Je ne sais pas        |
|------------------------------------|------------------------|-------------------------------|-----------------------|
| a. Fièvre                          | <input type="radio"/>  | <input type="radio"/>         | <input type="radio"/> |
| b. Toux sèche                      | <input type="radio"/>  | <input type="radio"/>         | <input type="radio"/> |
| c. Vomissements                    | <input type="radio"/>  | <input type="radio"/>         | <input type="radio"/> |
| d. Congestion nasale/nez qui coule | <input type="radio"/>  | <input type="radio"/>         | <input type="radio"/> |
| e. Éruptions cutanées              | <input type="radio"/>  | <input type="radio"/>         | <input type="radio"/> |

f. Autres symptômes (Veuillez préciser :)

---

For peer review only

**4. Pensez-vous que les groupes ci-dessous risquent davantage de développer de graves complications médicales une fois infectés par le coronavirus ?**

|                                                         | Oui, plus de risques  | Non, pas plus de risques | Je ne sais pas        |
|---------------------------------------------------------|-----------------------|--------------------------|-----------------------|
| a. Enfants                                              | <input type="radio"/> | <input type="radio"/>    | <input type="radio"/> |
| b. Femmes enceintes                                     | <input type="radio"/> | <input type="radio"/>    | <input type="radio"/> |
| c. Personnes atteintes de problèmes médicaux chroniques | <input type="radio"/> | <input type="radio"/>    | <input type="radio"/> |
| d. Personnes âgées d'une vingtaine d'années             | <input type="radio"/> | <input type="radio"/>    | <input type="radio"/> |
| e. Personnes obèses                                     | <input type="radio"/> | <input type="radio"/>    | <input type="radio"/> |
| f. Personnes de plus de 60 ans                          | <input type="radio"/> | <input type="radio"/>    | <input type="radio"/> |

5. Selon vous, existe-t-il un vaccin pour protéger les personnes du coronavirus actuel, également connu sous le nom de COVID-19 ?  Oui  Non  Je ne sais pas

6. Selon vous, le vaccin contre la grippe protège-t-il les personnes du coronavirus actuel, également connu sous le nom de COVID-19 ?  Oui  Non  Je ne sais pas

7. Selon vous, si une personne pense présenter les symptômes du coronavirus, que doit-elle faire ?  Rester chez elle et appeler un médecin  Se rendre immédiatement dans un service des urgences  Autre chose  Je ne sais pas

7a. Autre chose, veuillez expliquer

---

**Section 4 - Inquiétudes et expériences en matière de santé**

1  
2  
3  
4  
5  
6 1. Pensez-vous disposer de suffisamment d'informations  Oui  Non  Je ne sais pas  
7 sur les moyens de vous protéger et de protéger votre  
8 famille du coronavirus ?

9  
10 2. Le cas échéant, que faites-vous pour vous  
11 protéger et protéger votre famille du coronavirus ?  
12 \_\_\_\_\_  
13 \_\_\_\_\_

14 3. Pensez-vous que les inquiétudes et le stress liés  Oui, une influence majeure  
15 au coronavirus ont une influence négative sur votre  Oui, une influence mineure  
16 santé mentale ?  Non  
17  Je ne sais pas  
18 \_\_\_\_\_

19 3b. Veuillez expliquer :  
20 \_\_\_\_\_  
21 \_\_\_\_\_  
22 \_\_\_\_\_  
23 \_\_\_\_\_  
24 \_\_\_\_\_  
25 \_\_\_\_\_  
26 \_\_\_\_\_  
27 \_\_\_\_\_  
28 \_\_\_\_\_  
29 \_\_\_\_\_  
30 \_\_\_\_\_  
31 \_\_\_\_\_  
32 \_\_\_\_\_  
33 \_\_\_\_\_  
34 \_\_\_\_\_  
35 \_\_\_\_\_  
36 \_\_\_\_\_  
37 \_\_\_\_\_  
38 \_\_\_\_\_  
39 \_\_\_\_\_  
40 \_\_\_\_\_  
41 \_\_\_\_\_  
42 \_\_\_\_\_  
43 \_\_\_\_\_  
44 \_\_\_\_\_  
45 \_\_\_\_\_  
46 \_\_\_\_\_  
47 \_\_\_\_\_  
48 \_\_\_\_\_  
49 \_\_\_\_\_  
50 \_\_\_\_\_  
51 \_\_\_\_\_  
52 \_\_\_\_\_  
53 \_\_\_\_\_  
54 \_\_\_\_\_  
55 \_\_\_\_\_  
56 \_\_\_\_\_  
57 \_\_\_\_\_  
58 \_\_\_\_\_  
59 \_\_\_\_\_  
60 \_\_\_\_\_



1 **q4. Dans quelle mesure estimez-vous que chacun des groupes suivants se montre efficace**  
2 **3 dans la lutte contre le coronavirus et le COVID-19 ?**

- 4 a. Le système des soins de santé (y compris les hôpitaux, cliniques, médecins, infirmiers et autres prestataires de soins de santé)
- 5  Pas du tout efficace  
6  Pas très efficace  
7  Assez efficace  
8  Très efficace

9 a. Veuillez expliquer :  
10  
11 \_\_\_\_\_  
12

- 13 b. Le monde de la science (y compris les chercheurs et analystes)
- 14  Pas du tout efficace  
15  Pas très efficace  
16  Assez efficace  
17  Très efficace

18 b. Veuillez expliquer :  
19  
20 \_\_\_\_\_  
21  
22

- 23 c. Le gouvernement (y compris les gouvernements locaux et nationaux)
- 24  Pas du tout efficace  
25  Pas très efficace  
26  Assez efficace  
27  Très efficace

28 c. Veuillez expliquer :  
29  
30 \_\_\_\_\_  
31

- 32 d. Le système éducatif (y compris les écoles primaires et secondaires, et les universités)
- 33  Pas du tout efficace  
34  Pas très efficace  
35  Assez efficace  
36  Très efficace

37 d. Veuillez expliquer :  
38  
39 \_\_\_\_\_  
40  
41

- 42 e. Les commerces et services locaux (y compris les boutiques, supermarchés et restaurants)
- 43  Pas du tout efficace  
44  Pas très efficace  
45  Assez efficace  
46  Très efficace

47 e. Veuillez expliquer :  
48  
49 \_\_\_\_\_  
50

- 51 f. L'industrie (y compris les grands employeurs, les usines et les fabricants)
- 52  Pas du tout efficace  
53  Pas très efficace  
54  Assez efficace  
55  Très efficace

56 f. Veuillez expliquer :  
57  
58 \_\_\_\_\_  
59  
60

1 g. La presse (y compris les journalistes, les  
2 journaux, la télévision et les médias visuels)

- Pas du tout efficace
- Pas très efficace
- Assez efficace
- Très efficace

6 g. Veuillez expliquer :

\_\_\_\_\_

11 h. Les réseaux sociaux

- Pas du tout efficace
- Pas très efficace
- Assez efficace
- Très efficace

16 h. Veuillez expliquer :

\_\_\_\_\_

For peer review only

1  
2  
3  
4  
5  
6  
7  
8  
9  
10  
11  
12  
13  
14  
15  
16  
17  
18  
19  
20  
21  
22  
23  
24  
25  
26  
27  
28  
29  
30  
31  
32  
33  
34  
35  
36  
37  
38  
39  
40  
41  
42  
43  
44  
45  
46  
47  
48  
49  
50  
51  
52  
53  
54  
55  
56  
57  
58  
59  
60

**5. Dans quelle mesure les éléments suivants vous inquiètent-ils ?**

|                                                                                                                                                       | Très inquiétants      | Plutôt inquiétants    | Pas très inquiétants  | Pas du tout inquiétants | Je ne sais pas        |
|-------------------------------------------------------------------------------------------------------------------------------------------------------|-----------------------|-----------------------|-----------------------|-------------------------|-----------------------|
| a. Vous ou un membre de votre famille contractez le coronavirus                                                                                       | <input type="radio"/> | <input type="radio"/> | <input type="radio"/> | <input type="radio"/>   | <input type="radio"/> |
| b. Vous perdez des revenus en raison de la fermeture de votre lieu de travail ou d'une réduction de vos heures de travail en lien avec le coronavirus | <input type="radio"/> | <input type="radio"/> | <input type="radio"/> | <input type="radio"/>   | <input type="radio"/> |
| c. Vous contractez la maladie de Lyme                                                                                                                 | <input type="radio"/> | <input type="radio"/> | <input type="radio"/> | <input type="radio"/>   | <input type="radio"/> |
| d. Le coronavirus a des répercussions négatives sur vos investissements, notamment votre épargne-pension ou épargne-études                            | <input type="radio"/> | <input type="radio"/> | <input type="radio"/> | <input type="radio"/>   | <input type="radio"/> |
| e. Vous contractez la dengue                                                                                                                          | <input type="radio"/> | <input type="radio"/> | <input type="radio"/> | <input type="radio"/>   | <input type="radio"/> |
| f. Vous vous exposez au coronavirus, car vous ne pouvez pas vous permettre de rester chez vous et de vous absenter du travail                         | <input type="radio"/> | <input type="radio"/> | <input type="radio"/> | <input type="radio"/>   | <input type="radio"/> |
| g. Vous ne pouvez pas financièrement vous permettre de vous faire dépister ou traiter en cas de besoin                                                | <input type="radio"/> | <input type="radio"/> | <input type="radio"/> | <input type="radio"/>   | <input type="radio"/> |

h. Autre inquiétude, veuillez expliquer

\_\_\_\_\_

5b. Dans quelle mesure votre vie a-t-elle été perturbée par l'épidémie de coronavirus ?

- Complètement
- Beaucoup
- Juste un peu
- Pas du tout
- Je ne sais pas

5b. Veuillez expliquer dans quelle mesure votre vie a été perturbée par l'épidémie de coronavirus.

\_\_\_\_\_

**6. Avez-vous adopté les mesures suivantes en raison de la récente épidémie de coronavirus ?**

|                                                                                                            | Oui                   | Non                   | Je ne sais pas        |
|------------------------------------------------------------------------------------------------------------|-----------------------|-----------------------|-----------------------|
| a. Décider de ne pas voyager ou changer les projets de voyage                                              | <input type="radio"/> | <input type="radio"/> | <input type="radio"/> |
| b. Acheter ou porter un masque de protection                                                               | <input type="radio"/> | <input type="radio"/> | <input type="radio"/> |
| c. Faire des provisions d'articles tels que de la nourriture ou des produits ménagers                      | <input type="radio"/> | <input type="radio"/> | <input type="radio"/> |
| d. Reporter ou annuler des rendez-vous médicaux                                                            | <input type="radio"/> | <input type="radio"/> | <input type="radio"/> |
| e. Faire des réserves de médicaments sur ordonnance                                                        | <input type="radio"/> | <input type="radio"/> | <input type="radio"/> |
| f. Rester chez vous au lieu de vous rendre à l'école, au travail ou à d'autres activités habituelles       | <input type="radio"/> | <input type="radio"/> | <input type="radio"/> |
| g. Reporter ou annuler une procédure médicale ou chirurgicale                                              | <input type="radio"/> | <input type="radio"/> | <input type="radio"/> |
| h. Annuler votre participation à de grands rassemblements tels que des concerts ou des événements sportifs | <input type="radio"/> | <input type="radio"/> | <input type="radio"/> |
| i. Démissionner                                                                                            | <input type="radio"/> | <input type="radio"/> | <input type="radio"/> |

6b. N'hésitez pas à nous faire part d'explications ou de détails au sujet des éléments ci-dessus :

---

**7. Avez-vous rencontré les situations suivantes en raison du coronavirus ?**

7a. Vous avez perdu des revenus d'un emploi ou d'une entreprise

- Oui  
 Non  
 Je ne sais pas

a. Vous avez perdu des revenus d'un emploi ou d'une entreprise, veuillez expliquer

\_\_\_\_\_

7b. Vous n'avez pas pu faire vos courses

- Oui  
 Non  
 Je ne sais pas

b. Vous n'avez pas pu faire vos courses, veuillez expliquer

\_\_\_\_\_

7c. Vous n'avez pas pu acheter de produits d'entretien ou de gel hydroalcoolique

- Oui  
 Non  
 Je ne sais pas

7c. Vous n'avez pas pu acheter de produits d'entretien ou de gel hydroalcoolique, veuillez expliquer

\_\_\_\_\_

7d. Vous n'avez pas pu acheter vos médicaments sur ordonnance

- Oui  
 Non  
 Je ne sais pas

d. Vous n'avez pas pu acheter vos médicaments sur ordonnance, veuillez expliquer

\_\_\_\_\_

7e. Vous ou un membre de votre famille avez été harcelés, maltraités ou blessés en raison du coronavirus

- Oui  
 Non  
 Je ne sais pas

7e. Vous ou un membre de votre famille avez été harcelé, maltraité ou blessé en raison du coronavirus, veuillez expliquer.

\_\_\_\_\_

8. Dans quelle mesure suivez-vous les consignes de distanciation sociale ou physique, à savoir rester chez vous, rester à l'écart des autres autant que possible, ou rester à l'écart des autres lorsque vous vous trouvez dans un lieu public ?

- Très étroitement  
 Plutôt étroitement  
 Pas très étroitement  
 Pas étroitement du tout

Veuillez nous faire part de vos idées et de vos expériences en matière de distanciation sociale ou physique : (question ouverte)

\_\_\_\_\_

9. Avez-vous personnellement effectué un test de dépistage du coronavirus ?

- Oui, j'ai été dépisté(e)  
 Non, je n'ai pas été dépisté(e)  
 Je ne sais pas

1 9a. Parmi les personnes dépistées : quel a été le  
2 résultat du test ?  
3  Le test était positif  
4  Le test était négatif  
5  Je ne sais pas encore

6 10. Parmi les personnes non dépistées : avez-vous  
7 tenté d'effectuer un test de dépistage du  
8 coronavirus ?  
9  Oui  
10  Non  
11  Je ne sais pas

12 11. Parmi les personnes non dépistées : Pensez-vous  
13 que vous pourriez effectuer un test de dépistage du  
14 coronavirus si vous pensiez en avoir besoin ?  
15  Oui  
16  Non  
17  Je ne sais pas

18 11. Veuillez nous expliquer où vous pensez que vous  
19 pourriez effectuer un test de dépistage du  
20 coronavirus si vous pensiez en avoir besoin.  
21 \_\_\_\_\_

22 11. Veuillez nous expliquer pourquoi vous pensez que  
23 vous ne pourriez pas effectuer de test de dépistage  
24 du coronavirus si vous pensiez en avoir besoin.  
25 \_\_\_\_\_

26 12. Pensez-vous être - ou avoir récemment été -  
27 infecté(e) par le coronavirus ?  
28  Oui  
29  Non  
30  Je ne sais pas

31 Veuillez expliquer pourquoi vous pensez être - ou  
32 avoir récemment été - infecté(e) par le  
33 coronavirus  
34 \_\_\_\_\_

35 13. S'il existait un vaccin qui empêche de contracter  
36 le coronavirus, vous feriez-vous vacciner ?  
37  Oui  
38  Non  
39  Je ne sais pas

40 Veuillez expliquer pourquoi vous vous feriez vacciner  
41 s'il existait un vaccin.  
42 \_\_\_\_\_

43 Veuillez expliquer pourquoi vous ne vous feriez pas  
44 vacciner s'il existait un vaccin.  
45 \_\_\_\_\_

46 Veuillez expliquer pourquoi vous ne savez pas si vous  
47 feriez vacciner s'il existait un vaccin.  
48 \_\_\_\_\_

49 14. Connaissez-vous personnellement une personne  
50 infectée par le coronavirus (ou COVID-19) ? Cochez  
51 toutes les réponses qui s'appliquent.  
52  Oui, un membre de ma famille  
53  Oui, un ami  
54  Oui, un voisin  
55  Oui, quelqu'un d'autre  
56  Non  
57  Je ne sais pas

58 15. Connaissez-vous personnellement une personne  
59 décédée d'une infection au coronavirus (ou  
60 COVID-19) ? Cochez toutes les réponses qui  
s'appliquent.  
 Oui, un membre de ma famille  
 Oui, un ami  
 Oui, un voisin  
 Oui, quelqu'un d'autre  
 Non  
 Je ne sais pas

1  
2  
3  
4  
5  
6  
7  
8  
9  
10  
11  
12  
13  
14  
15  
16  
17  
18  
19  
20  
21  
22  
23  
24  
25  
26  
27  
28  
29  
30  
31  
32  
33  
34  
35  
36  
37  
38  
39  
40  
41  
42  
43  
44  
45  
46  
47  
48  
49  
50  
51  
52  
53  
54  
55  
56  
57  
58  
59  
60

---

16. La population parle-t-elle en mauvais termes des personnes qui vivent avec le coronavirus (ou COVID-19), ou en ont été infectées ou supposément infectées ?

- Absolument
- Probablement
- Probablement pas
- Absolument pas
- Je ne sais pas

---

17. Les personnes qui ont été infectées par le coronavirus (ou COVID-19) ont-elles perdu du respect ou leur statut dans la communauté ?

- Absolument
- Probablement
- Probablement pas
- Absolument pas
- Je ne sais pas

For peer review only

**Section 5 - Questions relatives à votre ménage**

- 1  
2  
3  
4  
5  
6  
7
- 8 1. Possédez-vous une voiture ?  Oui  
9  Non  
10  Je préfère ne pas répondre  
11
- 
- 12 2. Possédez-vous une habitation ?  Oui  
13  Non  
14  Je préfère ne pas répondre  
15
- 
- 16 3. Êtes-vous le parent ou le tuteur d'un enfant de  
17 moins de 18 ans qui vit dans votre ménage ?  Oui  
18  Non  
19  Je ne sais pas  
20
- 
- 21 4. L'école ou la garderie de votre enfant a-t-elle  
22 été fermée pendant une quelconque période en  
23 raison du coronavirus ?  Oui  
24  Non  
25  Je ne sais pas
- 
- 26 5. Si l'école ou la garderie de votre enfant a été  
27 fermée pendant au moins deux semaines en raison du  
28 coronavirus, dans quelle mesure vous a-t-il été  
29 difficile de trouver une solution de garde alternative  
30 ?  Très difficile  
31  Assez difficile  
32  Pas très difficile  
33  Pas difficile du tout
- 
- 34 6. Si vous deviez rester chez vous en raison de  
35 mesures de quarantaine ou de la fermeture de votre  
36 école ou lieu de travail, pourriez-vous continuer à  
37 remplir vos fonctions, même en partie ?  Oui  
38  Non  
39  Ne s'applique pas  
40  Je ne sais pas
- 
- 41 6. Veuillez expliquer comment vous pourriez continuer  
42 à remplir vos fonctions, au moins en partie  
43 \_\_\_\_\_  
44
- 
- 45 6. Veuillez expliquer pourquoi vous ne pourriez pas  
46 continuer à remplir vos fonctions, même en partie  
47 \_\_\_\_\_  
48
- 
- 49 7. Vous ou un membre de votre ménage travaillez-vous  
50 dans un cadre médical, comme le cabinet d'un  
51 médecin, une clinique, un hôpital, une maison de  
52 retraite ou le cabinet d'un dentiste ? (Cochez toutes  
53 les réponses qui s'appliquent)  Oui, moi  
54  Oui, un membre de mon ménage  
55  Non, personne  
56  Je ne sais pas
- 
- 57 8. Combien d'enfants de moins de 18 ans vivent  
58 actuellement dans votre ménage ? \_\_\_\_\_  
59
- 
- 60 9. Combien d'adultes de 18 ans ou plus vivent  
actuellement dans votre ménage, vous y compris ? \_\_\_\_\_
- 
10. Avez-vous des enfants à charge ?  Oui  
 Non  
 Je ne sais pas



1 11. Vous incombe-t-il de prendre soin de personnes  
2 âgées ?  Oui  
3  Non  
4  Je ne sais pas

5  
6 Veuillez nous parler de votre système de soutien  
7 social (amis, famille, voisins) :  
8 \_\_\_\_\_  
9  
10  
11  
12  
13  
14  
15  
16  
17  
18  
19  
20  
21  
22  
23  
24  
25  
26  
27  
28  
29  
30  
31  
32  
33  
34  
35  
36  
37  
38  
39  
40  
41  
42  
43  
44  
45  
46  
47  
48  
49  
50  
51  
52  
53  
54  
55  
56  
57  
58  
59  
60

For peer review only

**Section 6 : Stress au cours du mois dernier**

|                                                                                                                                      | Jamais                | Presque jamais        | Parfois               | Assez souvent         | Très souvent          |
|--------------------------------------------------------------------------------------------------------------------------------------|-----------------------|-----------------------|-----------------------|-----------------------|-----------------------|
| 1. Au cours du mois dernier, combien de fois avez-vous été contrarié(e) par un événement inattendu ?                                 | <input type="radio"/> |
| 2. Au cours du mois dernier, combien de fois avez-vous pensé ne pas être capable de contrôler les éléments importants de votre vie ? | <input type="radio"/> |
| 3. Au cours du mois dernier, combien de fois vous êtes-vous senti(e) nerveux(-se) et stressé(e) ?                                    | <input type="radio"/> |
| 4. Au cours du mois dernier, combien de fois avez-vous eu confiance en votre capacité à gérer vos problèmes personnels ?             | <input type="radio"/> |
| 5. Au cours du mois dernier, combien de fois avez-vous senti que les choses allaient dans votre sens ?                               | <input type="radio"/> |
| 6. Au cours du mois dernier, combien de fois vous êtes-vous senti(e) débordé(e) par toutes les choses que vous deviez faire ?        | <input type="radio"/> |
| 7. Au cours du mois dernier, combien de fois avez-vous pu contrôler les désagréments de votre vie ?                                  | <input type="radio"/> |
| 8. Au cours du mois dernier, combien de fois avez-vous pensé contrôler la situation ?                                                | <input type="radio"/> |
| 9. Au cours du mois dernier, combien de fois vous êtes-vous mis(e) en colère en raison d'éléments qui échappent à votre contrôle ?   | <input type="radio"/> |

1 10. Au cours du mois dernier,                   ○                   ○                   ○                   ○                   ○  
2 combien de fois avez-vous pensé  
3 devoir affronter tellement de  
4 difficultés qu'il vous serait  
5 impossible de les surmonter ?  
6  
7

---

8 11. Veuillez nous parler de votre sentiment de stress  
9 au cours du mois dernier :  
10 \_\_\_\_\_  
11

12  
13  
14  
15  
16  
17  
18  
19  
20  
21  
22  
23  
24  
25  
26  
27  
28  
29  
30  
31  
32  
33  
34  
35  
36  
37  
38  
39  
40  
41  
42  
43  
44  
45  
46  
47  
48  
49  
50  
51  
52  
53  
54  
55  
56  
57  
58  
59  
60

For peer review only

**Section 7 - Soutien social**

|                                                                          | Absolument pas d'accord | Pas du tout d'accord  | Pas vraiment d'accord | Neutre                | Plutôt d'accord       | Tout à fait d'accord  | Absolument d'accord   |
|--------------------------------------------------------------------------|-------------------------|-----------------------|-----------------------|-----------------------|-----------------------|-----------------------|-----------------------|
| 1. Un être cher m'aide quand j'en ai besoin.                             | <input type="radio"/>   | <input type="radio"/> | <input type="radio"/> | <input type="radio"/> | <input type="radio"/> | <input type="radio"/> | <input type="radio"/> |
| 2. Un être cher me permet de partager mes joies et mes peines.           | <input type="radio"/>   | <input type="radio"/> | <input type="radio"/> | <input type="radio"/> | <input type="radio"/> | <input type="radio"/> | <input type="radio"/> |
| 3. Ma famille fait tout pour m'aider.                                    | <input type="radio"/>   | <input type="radio"/> | <input type="radio"/> | <input type="radio"/> | <input type="radio"/> | <input type="radio"/> | <input type="radio"/> |
| 4. Ma famille me fournit le soutien émotionnel dont j'ai besoin.         | <input type="radio"/>   | <input type="radio"/> | <input type="radio"/> | <input type="radio"/> | <input type="radio"/> | <input type="radio"/> | <input type="radio"/> |
| 5. Un être cher me fournit tout le réconfort dont j'ai besoin.           | <input type="radio"/>   | <input type="radio"/> | <input type="radio"/> | <input type="radio"/> | <input type="radio"/> | <input type="radio"/> | <input type="radio"/> |
| 6. Mes amis font tout pour m'aider.                                      | <input type="radio"/>   | <input type="radio"/> | <input type="radio"/> | <input type="radio"/> | <input type="radio"/> | <input type="radio"/> | <input type="radio"/> |
| 7. Je peux compter sur mes amis quand les choses vont mal.               | <input type="radio"/>   | <input type="radio"/> | <input type="radio"/> | <input type="radio"/> | <input type="radio"/> | <input type="radio"/> | <input type="radio"/> |
| 8. Je peux parler de mes problèmes avec ma famille.                      | <input type="radio"/>   | <input type="radio"/> | <input type="radio"/> | <input type="radio"/> | <input type="radio"/> | <input type="radio"/> | <input type="radio"/> |
| 9. J'ai des amis qui me permettent de partager mes joies et mes peines.  | <input type="radio"/>   | <input type="radio"/> | <input type="radio"/> | <input type="radio"/> | <input type="radio"/> | <input type="radio"/> | <input type="radio"/> |
| 10. J'ai la chance d'avoir un être cher qui se soucie de mes sentiments. | <input type="radio"/>   | <input type="radio"/> | <input type="radio"/> | <input type="radio"/> | <input type="radio"/> | <input type="radio"/> | <input type="radio"/> |
| 11. Ma famille essaie de m'aider à prendre des décisions.                | <input type="radio"/>   | <input type="radio"/> | <input type="radio"/> | <input type="radio"/> | <input type="radio"/> | <input type="radio"/> | <input type="radio"/> |
| 12. Je peux parler de mes problèmes avec mes amis.                       | <input type="radio"/>   | <input type="radio"/> | <input type="radio"/> | <input type="radio"/> | <input type="radio"/> | <input type="radio"/> | <input type="radio"/> |

**Section 8 : Questions relatives à la santé**

1. De manière générale, diriez-vous que votre état de santé est

- Excellent  
 Très bon  
 Bon  
 Assez bon  
 Mauvais

2. En ce qui concerne votre santé physique, à savoir notamment les maladies et blessures physiques, pendant combien de jours votre santé physique n'a-t-elle pas été bonne au cours des 30 derniers jours ?

\_\_\_\_\_  
((nombre de jours))

3. En ce qui concerne votre santé mentale, à savoir notamment le stress, la dépression et les problèmes émotionnels, pendant combien de jours votre santé mentale n'a-t-elle pas été bonne au cours des 30 derniers jours ?

\_\_\_\_\_  
((nombre de jours))

4. Au cours des 30 derniers jours, pendant combien de jours environ votre mauvais état de santé physique ou mental vous a-t-il empêché de pratiquer vos activités habituelles, comme prendre soin de vous, travailler ou vous divertir ?

\_\_\_\_\_  
((nombre de jours))

5. Au cours de 12 derniers mois, avez-vous eu besoin de soins de santé (par exemple, consulter un médecin) sans pouvoir vous les permettre en raison de leur coût ?

- Oui  
 Non  
 Je ne sais pas

6. Vous ou un membre de votre ménage souffrez-vous d'un grave problème de santé, comme une hypertension artérielle, une maladie cardiaque ou pulmonaire, un cancer ou du diabète ? (Cochez toutes les réponses qui s'appliquent)

- Oui, moi  
 Oui, un membre de mon ménage  
 Non, personne  
 Je ne sais pas

7. Une des propositions ci-dessous s'applique-t-elle à vous ? (Cochez toutes les réponses qui s'appliquent)

- Je suis actuellement enceinte  
 Ma partenaire est actuellement enceinte  
 Ni ma partenaire ni moi ne sommes actuellement enceintes

8. Désirez-vous tomber enceinte ou avoir un enfant au cours de l'année à venir ?

- Oui  
 Non  
 Je ne sais pas

**Section 9 : Réseaux sociaux****1. Parmi les réseaux sociaux suivants, lesquels utilisez-vous ? (Pour chaque proposition, cochez la réponse la plus appropriée)**

|              | tous les jours        | plusieurs fois par semaine | plusieurs fois par mois | rarement              | jamais                |
|--------------|-----------------------|----------------------------|-------------------------|-----------------------|-----------------------|
| a. Facebook  | <input type="radio"/> | <input type="radio"/>      | <input type="radio"/>   | <input type="radio"/> | <input type="radio"/> |
| b. Twitter   | <input type="radio"/> | <input type="radio"/>      | <input type="radio"/>   | <input type="radio"/> | <input type="radio"/> |
| c. LinkedIn  | <input type="radio"/> | <input type="radio"/>      | <input type="radio"/>   | <input type="radio"/> | <input type="radio"/> |
| d. Instagram | <input type="radio"/> | <input type="radio"/>      | <input type="radio"/>   | <input type="radio"/> | <input type="radio"/> |
| e. WhatsApp  | <input type="radio"/> | <input type="radio"/>      | <input type="radio"/>   | <input type="radio"/> | <input type="radio"/> |
| f. Snapchat  | <input type="radio"/> | <input type="radio"/>      | <input type="radio"/>   | <input type="radio"/> | <input type="radio"/> |
| g. Reddit    | <input type="radio"/> | <input type="radio"/>      | <input type="radio"/>   | <input type="radio"/> | <input type="radio"/> |

2. Dans quelle mesure votre utilisation des réseaux sociaux a-t-elle évolué depuis le début de la pandémie de coronavirus ?

- J'utilise beaucoup plus les réseaux sociaux  
 J'utilise un peu plus les réseaux sociaux  
 Je n'utilise plus les réseaux sociaux  
 Je ne sais pas

2b. Veuillez expliquer dans quelle mesure votre utilisation des réseaux sociaux a évolué depuis le début de la pandémie de coronavirus :

\_\_\_\_\_

**Section 10 : Questions à caractère démographique**

1. En années, quel âge avez-vous actuellement ?

\_\_\_\_\_

2. Comment décririez-vous vos origines ethniques ?

\_\_\_\_\_

4. Vous considérez-vous de l'une des origines suivantes ? (Cochez toutes les réponses qui s'appliquent)

- Mexicaine
- Portoricaine
- Cubaine

4a. Si vous vous considérez comme faisant partie d'une autre ethnie hispanique ou latine que celles énumérées ci-dessus, veuillez préciser :

\_\_\_\_\_

4b. Je ne me considère pas comme d'origine hispanique ou latine

- Vrai
- Faux

5. Quel niveau scolaire avez-vous atteint ?

- Je n'ai pas terminé l'enseignement secondaire
- J'ai terminé l'enseignement secondaire
- J'ai fait des études supérieures, mais ne les ai pas terminées
- J'ai obtenu mon diplôme universitaire
- J'ai obtenu un diplôme universitaire de troisième cycle (doctorat, etc.)

**6. Le cas échéant, quelle est votre religion actuelle ? Cochez toutes les réponses qui s'appliquent**

|                                       | Oui                   | Non                   | Je préfère ne pas répondre |
|---------------------------------------|-----------------------|-----------------------|----------------------------|
| a. Christianisme                      | <input type="radio"/> | <input type="radio"/> | <input type="radio"/>      |
| b. Judaïsme                           | <input type="radio"/> | <input type="radio"/> | <input type="radio"/>      |
| c. Islam                              | <input type="radio"/> | <input type="radio"/> | <input type="radio"/>      |
| d. Bouddhisme                         | <input type="radio"/> | <input type="radio"/> | <input type="radio"/>      |
| e. Hindouisme                         | <input type="radio"/> | <input type="radio"/> | <input type="radio"/>      |
| f. Athéisme (je ne crois pas en Dieu) | <input type="radio"/> | <input type="radio"/> | <input type="radio"/>      |
| g. Autre                              | <input type="radio"/> | <input type="radio"/> | <input type="radio"/>      |
| h. Je ne sais pas                     | <input type="radio"/> | <input type="radio"/> | <input type="radio"/>      |

6g. Autre religion, veuillez préciser

\_\_\_\_\_

7. Si vous vivez aux États-Unis, veuillez identifier votre ethnie (cochez toutes les réponses qui s'appliquent)

- Amérindien(e) ou alaskain(e)  
 Asiatique  
 Noir ou Africain(e) américain(e)  
 Natif(ve) hawaïen(e)  
 Polynésien(e)  
 Caucasien(e)  
 Autre(s)

7. Vous avez sélectionné autre, veuillez préciser votre autre ethnie

\_\_\_\_\_

7. À laquelle des catégories suivantes vous identifiez-vous ?

- Entendant/non-sourd  
 Malentendant  
 sourd  
 Sourd  
 SourdAveugle

Dans le cadre de cette étude, veuillez utiliser les définitions suivantes.

Entendant/non-sourd : Personne sans perte auditive ;

Malentendant : Personne souffrant d'une certaine perte auditive ;

sourd : Personne souffrant d'une perte auditive ;

Sourd : Personne souffrant d'une perte auditive et s'identifiant à la culture Sourde ;

SourdAveugle : Personne souffrant d'une perte auditive et d'une perte totale ou partielle de la vue.

9. Parmi les propositions ci-dessous, laquelle décrit le mieux votre genre ?

- Homme  
 Femme  
 Autre option



1 q9. Vous avez sélectionné une autre option pour  
2 décrire votre genre, veuillez expliquer :  
3  
4

---

5 10. Vous vous décrivez comme (cochez toutes les  
6 réponses qui s'appliquent) :

- 7  Hétérosexuel(le)
  - 8  Gay
  - 9  Lesbienne
  - 10  Bisexuel(le)
  - 11  Transgenre
  - 12  Aucune des propositions ci-dessus
- 

13 10a. Aucune des propositions ci-dessus, veuillez  
14 préciser :  
15  
16  
17  
18  
19  
20  
21  
22  
23  
24  
25  
26  
27  
28  
29  
30  
31  
32  
33  
34  
35  
36  
37  
38  
39  
40  
41  
42  
43  
44  
45  
46  
47  
48  
49  
50  
51  
52  
53  
54  
55  
56  
57  
58  
59  
60

---

For peer review only

1 **Section 11 : Dernière question**  
2  
3  
4

5  
6 1. Si vous avez d'autres réflexions au sujet du  
7 coronavirus et du COVID-19, veuillez nous en faire  
8 part : \_\_\_\_\_  
9  
10  
11  
12  
13  
14  
15  
16  
17  
18  
19  
20  
21  
22  
23  
24  
25  
26  
27  
28  
29  
30  
31  
32  
33  
34  
35  
36  
37  
38  
39  
40  
41  
42  
43  
44  
45  
46  
47  
48  
49  
50  
51  
52  
53  
54  
55  
56  
57  
58  
59  
60

For peer review only

**Section 12 : Qualité de l'enquête**

**Nous aimerions vous poser quelques questions à propos de cette enquête afin de l'améliorer à l'avenir. Si vous désirez mettre l'accent sur certaines questions spécifiques, veuillez les copier et les coller dans le champ de texte.**

1. En général, les questions de l'enquête étaient >. Autrement dit, vous n'avez pas dû lire plusieurs fois les énoncés pour les comprendre.

- Pas du tout d'accord  
 Pas d'accord  
 Ni d'accord, ni pas d'accord  
 D'accord  
 Tout à fait d'accord

2. Certaines questions spécifiques étaient-elles particulièrement difficiles à comprendre ? Si oui, veuillez préciser lesquelles (aussi précisément que possible)

3. En règle générale, la signification des questions était simple et claire

- Pas du tout d'accord  
 Pas d'accord  
 Ni d'accord, ni pas d'accord  
 D'accord  
 Tout à fait d'accord

4. Certaines questions manquaient-elles de clarté ? Si oui, veuillez préciser lesquelles (aussi précisément que possible)

- Oui  Non

4a. Si oui, veuillez préciser lesquelles (aussi précisément que possible)

5. Les échelles utilisées pour répondre aux questions étaient adéquates. Autrement dit, selon vous, les échelles fournies vous permettaient-elles de répondre de manière appropriée ?

- Pas du tout d'accord  
 Pas d'accord  
 Ni d'accord, ni pas d'accord  
 D'accord  
 Tout à fait d'accord

6. Selon vous, certaines questions étaient-elles rédigées de manière à ce qu'il n'y ait qu'une SEULE réponse ÉVIDENTE pour vous ?

- Oui  
 No

6b. Veuillez expliquer :

N'hésitez pas à indiquer tout autre commentaire au sujet de cette étude

( )

Pour plus d'informations au sujet du coronavirus et du COVID-19, rendez-vous sur

<https://www.gouvernement.fr/info-coronavirus>

<https://www.cdc.gov/coronavirus/2019-ncov/index.html>

<https://www.cdc.gov/>

1 <https://www.who.int/>

2  
3  
4  
5 Merci!

6  
7  
8  
9  
10  
11  
12  
13  
14  
15  
16  
17  
18  
19  
20  
21  
22  
23  
24  
25  
26  
27  
28  
29  
30  
31  
32  
33  
34  
35  
36  
37  
38  
39  
40  
41  
42  
43  
44  
45  
46  
47  
48  
49  
50  
51  
52  
53  
54  
55  
56  
57  
58  
59  
60

For peer review only

# Sondaggio globale sul coronavirus

1  
2 Benvenuto! Con la presente ti invitiamo a partecipare a un sondaggio epidemiologico globale condotto dall'Università  
3 di Rochester, in modo da consentirci una migliore comprensione delle opinioni, convinzioni e conoscenze relative ad  
4 alcune tematiche legate alle attuali questioni di sanità pubblica, come il coronavirus, il COVID-19, e altre malattie  
5 infettive, e i fattori ad esse potenzialmente correlati. Se hai più di 18 anni e sei in grado di rispondere al sondaggio in  
6 italiano, puoi cominciare qui sotto!  
7

---

8  
9 Language \_\_\_\_\_  
10  
11  
12  
13  
14  
15  
16  
17  
18  
19  
20  
21  
22  
23  
24  
25  
26  
27  
28  
29  
30  
31  
32  
33  
34  
35  
36  
37  
38  
39  
40  
41  
42  
43  
44  
45  
46  
47  
48  
49  
50  
51  
52  
53  
54  
55  
56  
57  
58  
59  
60

For peer review only

SCHOOL OF MEDICINE AND DENTISTRY

Department of Obstetrics & Gynecology



### Sondaggio globale sul coronavirus: opinioni e modalità d'intervento

**Sperimentatori principali:** Timothy Dye, PhD ed Eva Pressman, MD

Il presente modulo è parte di uno studio sperimentale condotto da alcuni membri del corpo docente della Facoltà di Medicina e Odontoiatria dell'Università di Rochester.

Lo scopo di questo studio è raggiungere una migliore comprensione delle opinioni, convinzioni e conoscenze relative ad alcune tematiche legate alle attuali questioni di sanità pubblica, come il coronavirus e altre malattie infettive, e i fattori ad esse potenzialmente correlati. Lo studio include domande sulle tue opinioni ed esperienze riguardo al coronavirus e al COVID-19, alla salute fisica e mentale, allo stress e al sostegno sociale, oltre a domande demografiche. Puoi saltare tutte le domande che vuoi.

Se decidi di partecipare a questo studio, sarai invitato a completare un sondaggio accessibile su internet attraverso un link. Per completare il questionario ci vorranno circa 20–40 minuti. Secondo le nostre stime, saranno circa 7000 le persone che prenderanno parte a questo studio.

I rischi legati alla partecipazione sono minimi. Alcune domande potrebbero turbarti o risultare imbarazzanti. Sei libero di saltare tutte le domande alle quali non desideri rispondere. Per proteggere la riservatezza dei dati, le risposte saranno trasmesse in formato crittografato (leggibile solo dal personale autorizzato). Non sono previste indennità.

Non riceverai alcun compenso per la partecipazione a questo sondaggio.

L'Università di Rochester farà tutto il possibile per mantenere confidenziali le informazioni raccolte. I risultati della ricerca potranno essere presentati in convegni o pubblicazioni, sempre mantenendo nascosta l'identità delle singole persone che hanno risposto.

**La tua partecipazione allo studio è assolutamente volontaria.** Sei libero di non partecipare e puoi ritirarti in qualsiasi momento. Se decidi di interrompere la compilazione, non sarà per noi possibile eliminare le informazioni già acquisite, poiché non saremmo in grado di rintracciare ed eliminare le risposte da te fornite dal momento che non raccogliamo alcun dato personale.

L'Università di Rochester sta ricevendo un pagamento dalla Mae Stone Goode Foundation per aver condotto questo studio di ricerca.

Per ulteriori informazioni o domande su questa ricerca puoi rivolgerti al Dr. Timothy Dye, e-mail [tim\\_dye@urmc.rochester.edu](mailto:tim_dye@urmc.rochester.edu).

Sei pregato di contattare il Comitato etico per la ricerca dell'Università di Rochester: University of Rochester Research Subjects Review Board, 265 Crittenden Blvd., CU 420315, Rochester, NY 14642, Telefono +1 (585) 276-0005 o +1 (877) 449-4441 nel caso tu avessi l'esigenza:

- di parlare con una persona indipendente dal gruppo di ricerca riguardo ai tuoi diritti in quanto partecipante alla ricerca;
- di esprimere dubbi sulla ricerca.

RSRB STUDY00004825  
Version Date: April 28, 2020

RSRB Approval Date: 4/28/2020

1 Sondaggio globale sul coronavirus: opinioni e modalità d'intervento

2  
3 Sperimentatori principali: Timothy Dye, PhD ed Eva Pressman, MD

4  
5  
6  
7 Il presente modulo è parte di uno studio sperimentale condotto da alcuni membri del corpo docente della Facoltà di  
8 Medicina e Odontoiatria dell'Università di Rochester.

9  
10 Lo scopo di questo studio è raggiungere una migliore comprensione delle opinioni, convinzioni e conoscenze relative  
11 ad alcune tematiche legate alle attuali questioni di sanità pubblica, come il coronavirus e altre malattie infettive, e i  
12 fattori ad esse potenzialmente correlati. Lo studio include domande sulle tue opinioni ed esperienze riguardo al  
13 coronavirus e al COVID-19, alla salute fisica e mentale, allo stress e al sostegno sociale, oltre a domande  
14 demografiche. Puoi saltare tutte le domande che vuoi.

15 Se decidi di partecipare a questo studio, sarai invitato a completare un sondaggio accessibile su internet attraverso  
16 un link. Per completare il questionario ci vorranno circa 15-25 minuti. Secondo le nostre stime, saranno circa 7000 le  
17 persone che prenderanno parte a questo studio.

18  
19 I rischi legati alla partecipazione sono minimi. Alcune domande potrebbero turbarti o risultare imbarazzanti. Sei  
20 libero di saltare tutte le domande alle quali non desideri rispondere. Per proteggere la riservatezza dei dati, le  
21 risposte saranno trasmesse in formato crittografato (leggibile solo dal personale autorizzato). Non sono previste  
22 indennità.

23  
24 Non riceverai alcun compenso per la partecipazione a questo sondaggio.

25  
26 L'Università di Rochester farà tutto il possibile per mantenere confidenziali le informazioni raccolte. I risultati della  
27 ricerca potranno essere presentati in convegni o pubblicazioni, sempre mantenendo nascosta l'identità delle singole  
28 persone che hanno risposto.

29  
30 La tua partecipazione allo studio è assolutamente volontaria. Sei libero di non partecipare e puoi ritirarti in qualsiasi  
31 momento. Se decidi di interrompere la compilazione, non sarà per noi possibile eliminare le informazioni già  
32 acquisite, poiché non saremmo in grado di rintracciare ed eliminare le risposte da te fornite dal momento che non  
33 raccogliamo alcun dato personale.

34 L'Università di Rochester sta ricevendo un pagamento dalla Mae Stone Goode Foundation per aver condotto questo  
35 studio di ricerca.

36  
37 Per ulteriori informazioni o domande su questa ricerca puoi rivolgerti al Dr. Timothy Dye, e-mail  
38 tim\_dye@urmc.rochester.edu.

39  
40 Sei pregato di contattare il Comitato etico per la ricerca dell'Università di Rochester: University of Rochester  
41 Research Subjects Review Board, 265 Crittenden Blvd., CU 420315, Rochester, NY 14642, Telefono +1 (585)  
42 276-0005 o + 1 (877) 449-4441 nel caso tu avessi l'esigenza:

43  
44 di parlare con una persona indipendente dal gruppo di ricerca riguardo ai tuoi diritti in quanto partecipante alla  
45 ricerca; di esprimere dubbi sulla ricerca.

46  
47  
48  
49  
50 Vuoi cominciare il sondaggio?

- 51  Sì  
52  No  
53  
54  
55  
56  
57  
58  
59  
60

1 **Sezione 1: domande sulla nazionalità**

2  
3  
4  
5  
6  
7  
8  
9  
10  
11  
12  
13  
14  
15  
16  
17  
18  
19  
20  
21  
22  
23  
24  
25  
26  
27  
28  
29  
30  
31  
32  
33  
34  
35  
36  
37  
38  
39  
40  
41  
42  
43  
44  
45  
46  
47  
48  
49  
50  
51  
52  
53  
54  
55  
56  
57  
58  
59  
60

For peer review only



1 1. In quale paese vivi?  
2  
3  
4  
5  
6  
7  
8  
9  
10  
11  
12  
13  
14  
15  
16  
17  
18  
19  
20  
21  
22  
23  
24  
25  
26  
27  
28  
29  
30  
31  
32  
33  
34  
35  
36  
37  
38  
39  
40  
41  
42  
43  
44  
45  
46  
47  
48  
49  
50  
51  
52  
53  
54  
55  
56  
57  
58  
59  
60

- afghanistan
- Albania
- algeria
- andorra
- angola
- anguilla
- Antartide [a]
- Antigua e Barbuda
- Arabia saudita
- Argentina
- Armenia
- aruba
- Australia [b]
- Austria
- Azerbaijan
- Bahamas (la)
- Bahrain
- bangladesh
- barbados
- Belgio
- Belize
- benin
- Bhutan
- Bielorussia
- Bolivia (stato plurinazionale di)
- Bonaire
- Bosnia ed Erzegovina
- Botswana
- Brasile
- Brunei Darussalam [e]
- Bulgaria
- Burkina Faso
- burundi
- Cambogia
- Camerun
- Canada
- Capo Verde [f]
- chad
- chile
- Cipro
- Cocos (Keeling) Islands (the)
- Colombia
- Comore (las)
- Congo (Repubblica Democratica del)
- Congo (the) [g]
- Corea (Repubblica democratica popolare di) [o]
- Corea (Repubblica di) [p]
- Costa d'Avorio [h]
- Costa Rica
- Croazia
- Cuba
- Curagao
- Danimarca
- dominica
- Ecuador
- Egitto
- El Salvador
- Emirati Arabi Uniti (el)
- eritrea
- Estonia
- Eswatini [j]
- Etiopia
- fiji
- Filippine (il)
- Finlandia
- Francia [l]
- French Southern Territories (the) [m]
- Gabon
- Gambia

1  
2  
3  
4  
5  
6  
7  
8  
9  
10  
11  
12  
13  
14  
15  
16  
17  
18  
19  
20  
21  
22  
23  
24  
25  
26  
27  
28  
29  
30  
31  
32  
33  
34  
35  
36  
37  
38  
39  
40  
41  
42  
43  
44  
45  
46  
47  
48  
49  
50  
51  
52  
53  
54  
55  
56  
57  
58  
59  
60

- Georgia
- Georgia del Sud e Isole Sandwich Meridionali
- Germania
- Ghana
- Giamaica
- Giappone
- Gibilterra
- Gibuti
- Giordania
- Granada
- Grecia
- Groenlandia
- Guadalupe
- guam
- Guatemala
- Guiana
- Guinea
- Guinea Equatoriale
- Guinea-Bissau
- Guyana francese
- Honduras
- Hong Kong
- incontro
- India
- Indonesia
- Iran (Repubblica islamica di)
- Iraq
- Irlanda
- Islanda
- Isola Bouvet
- Isola di Ascencion
- Isola di Man
- Isola di natale
- Isola Norfolk
- Isole Aland
- Isole Bermuda
- Isole Cayman
- Isole Cook
- Isole Falkland (the) [Falklands] [k]
- Isole Faroe
- Isole Heard e McDonald
- Isole Marianne Settentrionali
- Isole Marshall
- Isole minori esterne degli Stati Uniti (the) [ac]
- Isole Salomone
- Isole Turks e Caicos (Ia)
- Isole Vergini (USA,) [Ag]
- Isole Vergini britanniche [af]
- Israele
- Italia
- Jan Mayen
- Kazakistan
- Kenia
- Kiribati
- Kuwait
- Kirgizstan
- Lesoto
- Lettonia
- Libano
- Liberia
- Libia
- Liechtenstein
- Lituania
- Lussemburgo
- Macao [r]
- Macedonia settentrionale [s]
- Madagascar
- maglia
- magione
- malawi
- Malaysia

1  
2  
3  
4  
5  
6  
7  
8  
9  
10  
11  
12  
13  
14  
15  
16  
17  
18  
19  
20  
21  
22  
23  
24  
25  
26  
27  
28  
29  
30  
31  
32  
33  
34  
35  
36  
37  
38  
39  
40  
41  
42  
43  
44  
45  
46  
47  
48  
49  
50  
51  
52  
53  
54  
55  
56  
57  
58  
59  
60

- Maldive
- mali
- Malta
- Marocco
- Martinique
- Mauricio
- Mauritania
- mayotte
- Messico
- Micronesia (Stati Federati di)
- Moldavia (Repubblica di)
- Monaco
- Mongolia
- montenegro
- montserrat
- Mozambico
- Myanmar [t]
- Namibia
- nauru
- Nepal
- Nicaragua
- Niger (la)
- Nigeria
- Niue
- Norvegia
- Nuova Caledonia
- Nuova Zelanda
- Oman
- Paesi Bassi (la)
- Pakistan
- Palau
- Palestina, Stato di
- Panama
- Papua Nuova Guinea
- Paraguay
- Perù
- Pitcairn [u]
- Polinesia Francese
- Polonia
- porcellana
- Portogallo
- Puerto Rico
- Qatar
- Regno Unito di Gran Bretagna e Irlanda del Nord (il)
- Repubblica araba siriana (la) [x]
- Repubblica Ceca [i]
- Repubblica Centrafricana
- Repubblica Democratica Popolare del Laos (la) [q]
- Repubblica Dominicana
- Romania
- Ruanda
- Russian Federation (the) [v]
- Saba
- Sahara occidentale [ah]
- Saint Kitts e Nevis
- Saint Martin (parte francese)
- Saint Pierre e Miquelon
- Saint Vincent e Grenadine
- samoa
- Samoa americane
- San Bartolomeo
- San Marino
- Sant'Elena
- Sant'Eustachio
- Santa Lucia
- Santa Sede (il) [n]
- Sao Tome e Principe
- Senegal
- Serbia
- Seychelles

- 1  
2  
3  
4  
5  
6  
7  
8  
9  
10  
11  
12  
13  
14  
15  
16  
17  
18  
19  
20  
21  
22  
23  
24  
25  
26  
27  
28  
29  
30  
31  
32  
33  
34  
35  
36  
37  
38  
39  
40  
41
- Sierra Leone
  - Singapore
  - Sint Maarten (parte olandese)
  - Slovacchia
  - Slovenia
  - Somalia
  - Spagna
  - Sri Lanka
  - Stati Uniti d'America (the)
  - Sudafrica
  - Sudan (la)
  - Sudan del sud
  - Suriname
  - Svalbard
  - Svezia
  - Svizzera
  - Taiwan (Provincia della Cina) [e]
  - Tajikistan
  - Tanzania, Repubblica unita di
  - Territorio britannico dell'Oceano Indiano (el)
  - Thailandia
  - Timor Est [aa]
  - togo
  - Tokelau
  - tonga
  - Trinidad e Tobago
  - Tristan da Cunha
  - Tunisia
  - Turchia
  - Turkmenistan
  - Tuvalu
  - Ucraina
  - Uganda
  - Ungheria
  - Uruguay
  - Uzbekistan
  - Vanuatu
  - Venezuela (Repubblica Bolivariana di)
  - Vietnam [ae]
  - Wallis e Futuna
  - yemen
  - Zambia
  - Zimbabwe
  - Altro

42  
43  
44  
45  
46  
47  
48  
49  
50  
51  
52  
53  
54  
55  
56  
57  
58  
59  
60

---

Se risiedi in un altro paese, per favore specifica quale

---

1 1b. Se sei residente negli Stati Uniti, in quale stato  
2 vivi?  
3

- 4  New York
- 5  Alabama
- 6  Alaska
- 7  Arizona
- 8  Arkansas
- 9  California
- 10  Colorado
- 11  Connecticut
- 12  Delaware
- 13  Florida
- 14  Georgia
- 15  Hawaii
- 16  Idaho
- 17  Illinois
- 18  Indiana
- 19  Iowa
- 20  Kansas
- 21  Kentucky
- 22  Louisiana
- 23  Maine
- 24  Maryland
- 25  Massachusetts
- 26  Michigan
- 27  Minnesota
- 28  Mississippi
- 29  Missouri
- 30  Montana
- 31  Nebraska
- 32  Nevada
- 33  New Hampshire
- 34  New Jersey
- 35  New Mexico
- 36  North Carolina
- 37  North Dakota
- 38  Ohio
- 39  Oklahoma
- 40  Oregon
- 41  Pennsylvania
- 42  Rhode Island
- 43  South Carolina
- 44  South Dakota
- 45  Tennessee
- 46  Texas
- 47  Utah
- 48  Vermont
- 49  Virginia
- 50  Washington
- 51  West Virginia
- 52  Wisconsin
- 53  Wyoming

For peer review only

1c. Se risiedi in India, in quale stato vivi?

- IN-AP = Andhra Pradesh
- IN-AR = Arunachal Pradesh
- IN-AS = Assam
- IN-BR = Bihar
- IN-CT = Chhattisgarh
- IN-GA = Goa
- IN-GJ = Gujarat
- IN-HR = Haryana
- IN-HP = Himachal Pradesh
- IN-JH = Jharkhand
- IN-KA = Karnataka
- IN-KL = Kerala
- IN-MP = Madhya Pradesh
- IN-MH = Maharashtra
- IN-MN = Manipur
- IN-ML = Meghalaya
- IN-MZ = Mizoram
- IN-NL = Nagaland
- IN-OR = Odisha
- IN-PB = Punjab
- IN-RJ = Rajasthan
- IN-SK = Sikkim
- IN-TN = Tamil Nadu
- IN-TG = Telangana
- IN-TR = Tripura
- IN-UT = Uttarakhand
- IN-UP = Uttar Pradesh
- IN-WB = West Bengal
- IN-AN = Andaman and Nicobar Islands
- IN-CH = Chandigarh
- IN-DN = Dadra and Nagar Haveli
- IN-DD = Daman and Diu
- IN-DL = Delhi
- IN-JK = Jammu and Kashmir
- IN-LA = Ladakh
- IN-LD = Lakshadweep
- IN-PY = Puducherry

1 2. In quale paese sei nato?

- 2  afghanistan
- 3  Albania
- 4  algeria
- 5  andorra
- 6  angola
- 7  anguilla
- 8  Antartide [a]
- 9  Antigua e Barbuda
- 10  Arabia saudita
- 11  Argentina
- 12  Armenia
- 13  aruba
- 14  Australia [b]
- 15  Austria
- 16  Azerbaijan
- 17  Bahamas (la)
- 18  Bahrain
- 19  bangladesh
- 20  barbados
- 21  Belgio
- 22  Belize
- 23  benin
- 24  Bhutan
- 25  Bielorussia
- 26  Bolivia (stato plurinazionale di)
- 27  Bonaire
- 28  Bosnia ed Erzegovina
- 29  Botswana
- 30  Brasile
- 31  Brunei Darussalam [e]
- 32  Bulgaria
- 33  Burkina Faso
- 34  burundi
- 35  Cambogia
- 36  Camerun
- 37  Canada
- 38  Capo Verde [f]
- 39  chad
- 40  chile
- 41  Cipro
- 42  Cocos (Keeling) Islands (the)
- 43  Colombia
- 44  Comore (las)
- 45  Congo (Repubblica Democratica del)
- 46  Congo (the) [g]
- 47  Corea (Repubblica democratica popolare di) [o]
- 48  Corea (Repubblica di) [p]
- 49  Costa d'Avorio [h]
- 50  Costa Rica
- 51  Croazia
- 52  Cuba
- 53  Curagao
- 54  Danimarca
- 55  dominica
- 56  Ecuador
- 57  Egitto
- 58  El Salvador
- 59  Emirati Arabi Uniti (el)
- 60  eritrea
- Estonia
- Eswatini [j]
- Etiopia
- fiji
- Filippine (il)
- Finlandia
- Francia [l]
- French Southern Territories (the) [m]
- Gabon
- Gambia

1  
2  
3  
4  
5  
6  
7  
8  
9  
10  
11  
12  
13  
14  
15  
16  
17  
18  
19  
20  
21  
22  
23  
24  
25  
26  
27  
28  
29  
30  
31  
32  
33  
34  
35  
36  
37  
38  
39  
40  
41  
42  
43  
44  
45  
46  
47  
48  
49  
50  
51  
52  
53  
54  
55  
56  
57  
58  
59  
60

- Georgia
- Georgia del Sud e Isole Sandwich Meridionali
- Germania
- Ghana
- Giamaica
- Giappone
- Gibilterra
- Gibuti
- Giordania
- Granada
- Grecia
- Groenlandia
- Guadalupe
- guam
- Guatemala
- Guiana
- Guinea
- Guinea Equatoriale
- Guinea-Bissau
- Guyana francese
- Honduras
- Hong Kong
- incontro
- India
- Indonesia
- Iran (Repubblica islamica di)
- Iraq
- Irlanda
- Islanda
- Isola Bouvet
- Isola di Ascencion
- Isola di Man
- Isola di natale
- Isola Norfolk
- Isole Aland
- Isole Bermuda
- Isole Cayman
- Isole Cook
- Isole Falkland (the) [Falklands] [k]
- Isole Faroe
- Isole Heard e McDonald
- Isole Marianne Settentrionali
- Isole Marshall
- Isole minori esterne degli Stati Uniti (the) [ac]
- Isole Salomone
- Isole Turks e Caicos (Ia)
- Isole Vergini (USA,) [Ag]
- Isole Vergini britanniche [af]
- Israele
- Italia
- Jan Mayen
- Kazakistan
- Kenia
- Kiribati
- Kuwait
- Kirgizstan
- Lesoto
- Lettonia
- Libano
- Liberia
- Libia
- Liechtenstein
- Lituania
- Lussemburgo
- Macao [r]
- Macedonia settentrionale [s]
- Madagascar
- maglia
- magione
- malawi
- Malaysia



1  
2  
3  
4  
5  
6  
7  
8  
9  
10  
11  
12  
13  
14  
15  
16  
17  
18  
19  
20  
21  
22  
23  
24  
25  
26  
27  
28  
29  
30  
31  
32  
33  
34  
35  
36  
37  
38  
39  
40  
41  
42  
43  
44  
45  
46  
47  
48  
49  
50  
51  
52  
53  
54  
55  
56  
57  
58  
59  
60

- Maldive
- mali
- Malta
- Marocco
- Martinique
- Mauricio
- Mauritania
- mayotte
- Messico
- Micronesia (Stati Federati di)
- Moldavia (Repubblica di)
- Monaco
- Mongolia
- montenegro
- montserrat
- Mozambico
- Myanmar [t]
- Namibia
- nauru
- Nepal
- Nicaragua
- Niger (la)
- Nigeria
- Niue
- Norvegia
- Nuova Caledonia
- Nuova Zelanda
- Oman
- Paesi Bassi (la)
- Pakistan
- Palau
- Palestina, Stato di
- Panama
- Papua Nuova Guinea
- Paraguay
- Perù
- Pitcairn [u]
- Polinesia Francese
- Polonia
- porcellana
- Portogallo
- Puerto Rico
- Qatar
- Regno Unito di Gran Bretagna e Irlanda del Nord (il)
- Repubblica araba siriana (la) [x]
- Repubblica Ceca [i]
- Repubblica Centrafricana
- Repubblica Democratica Popolare del Laos (la) [q]
- Repubblica Dominicana
- Romania
- Ruanda
- Russian Federation (the) [v]
- Saba
- Sahara occidentale [ah]
- Saint Kitts e Nevis
- Saint Martin (parte francese)
- Saint Pierre e Miquelon
- Saint Vincent e Grenadine
- samoa
- Samoa americane
- San Bartolomeo
- San Marino
- Sant'Elena
- Sant'Eustachio
- Santa Lucia
- Santa Sede (il) [n]
- Sao Tome e Principe
- Senegal
- Serbia
- Seychelles

- 1  
2  
3  
4  
5  
6  
7  
8  
9  
10  
11  
12  
13  
14  
15  
16  
17  
18  
19  
20  
21  
22  
23  
24  
25  
26  
27  
28  
29  
30  
31  
32  
33  
34  
35  
36  
37  
38  
39  
40  
41
- Sierra Leone
  - Singapore
  - Sint Maarten (parte olandese)
  - Slovacchia
  - Slovenia
  - Somalia
  - Spagna
  - Sri Lanka
  - Stati Uniti d'America (the)
  - Sudafrica
  - Sudan (la)
  - Sudan del sud
  - Suriname
  - Svalbard
  - Svezia
  - Svizzera
  - Taiwan (Provincia della Cina) [e]
  - Tajikistan
  - Tanzania, Repubblica unita di
  - Territorio britannico dell'Oceano Indiano (el)
  - Thailandia
  - Timor Est [aa]
  - togo
  - Tokelau
  - tonga
  - Trinidad e Tobago
  - Tristan da Cunha
  - Tunisia
  - Turchia
  - Turkmenistan
  - Tuvalu
  - Ucraina
  - Uganda
  - Ungheria
  - Uruguay
  - Uzbekistan
  - Vanuatu
  - Venezuela (Repubblica Bolivariana di)
  - Vietnam [ae]
  - Wallis e Futuna
  - yemen
  - Zambia
  - Zimbabwe
  - Altro

42  
43  
44  
45  
46  
47  
48  
49  
50  
51  
52  
53  
54  
55  
56  
57  
58  
59  
60

---

Se sei nato in un altro paese, per favore specifica quale

---

**Sezione 2: Opinioni riguardo alla salute**

Ciascuna delle affermazioni sotto riportate rappresenta una tua convinzione relativa alla tua salute, riguardo alla quale puoi esprimere il tuo grado di accordo o disaccordo. Questa è una misura delle tue idee personali; non ci sono risposte giuste o sbagliate. Ti invitiamo a esprimere il tuo grado di accordo o disaccordo con ciascuna delle affermazioni sotto riportate.

|                                                                                                                 | Per niente d'accordo  | Poco d'accordo        | Mediamente d'accordo  | D'accordo             | Molto d'accordo       |
|-----------------------------------------------------------------------------------------------------------------|-----------------------|-----------------------|-----------------------|-----------------------|-----------------------|
| 1. Se mi ammalo, sarà il mio comportamento a determinare quanto tempo mi occorrerà per tornare in salute.       | <input type="radio"/> |
| 2. Indipendentemente da quello che faccio, se devo ammalarmi, mi ammalerò.                                      | <input type="radio"/> |
| 3. Fissare controlli regolari con il mio medico è il modo migliore per evitare di ammalarmi.                    | <input type="radio"/> |
| 4. La maggior parte delle cose che incidono sulla mia salute capitano per caso.                                 | <input type="radio"/> |
| 5. Ogni volta che non mi sento bene, ritengo giusto consultare un professionista specializzato in campo medico. | <input type="radio"/> |
| 6. Sono io che ho il controllo sulla mia salute.                                                                | <input type="radio"/> |
| 7. Per molti versi, il fatto che io possa ammalarmi o rimanere sano dipende dalla mia famiglia.                 | <input type="radio"/> |
| 8. Quando mi ammalo, è per colpa mia.                                                                           | <input type="radio"/> |
| 9. La velocità con cui mi ristabilisco da una malattia dipende in gran parte dalla fortuna.                     | <input type="radio"/> |
| 10. Gli operatori sanitari hanno il controllo della mia salute                                                  | <input type="radio"/> |

- 1 11. La mia buona salute è in
- 2 gran parte una questione di
- 3 fortuna.
- 4
- 5 12. Più di ogni altra cosa è ciò
- 6 che faccio ad avere il maggiore
- 7 impatto sulla mia salute.
- 8
- 9
- 10 13. Se ho cura di me stesso,
- 11 posso evitare di ammalarmi.
- 12
- 13 14. Di solito guarisco dalle
- 14 malattie perché altre persone
- 15 (ad esempio medici, infermieri,
- 16 familiari, amici) si sono prese
- 17 cura di me.
- 18
- 19 15. Indipendentemente da ciò
- 20 che faccio, tendo ad ammalarmi
- 21 molto facilmente.
- 22
- 23 16. Se è scritto che resterò sano,
- 24 non mi ammalerò.
- 25
- 26 17. Se farò le cose giuste,
- 27 resterò in salute.
- 28
- 29 18. Per quanto riguarda la mia
- 30 salute, faccio soltanto ciò che mi
- 31 prescrive il mio medico.
- 32
- 33
- 34
- 35
- 36
- 37
- 38
- 39
- 40
- 41
- 42
- 43
- 44
- 45
- 46
- 47
- 48
- 49
- 50
- 51
- 52
- 53
- 54
- 55
- 56
- 57
- 58
- 59
- 60

**Sezione 3 - Convinzioni riguardo al coronavirus**

**1. Per quanto è a tua conoscenza, gli esperti della sanità pubblica hanno raccomandato le seguenti azioni allo scopo di contribuire a rallentare la diffusione del coronavirus?**

|                                                               | Sì, l'hanno consigliato | No, non l'hanno consigliato | Non saprei            |
|---------------------------------------------------------------|-------------------------|-----------------------------|-----------------------|
| a. Lavarsi spesso le mani                                     | <input type="radio"/>   | <input type="radio"/>       | <input type="radio"/> |
| b. Bollire l'acqua prima di berla                             | <input type="radio"/>   | <input type="radio"/>       | <input type="radio"/> |
| c. Le persone sane devono indossare la mascherina in pubblico | <input type="radio"/>   | <input type="radio"/>       | <input type="radio"/> |
| d. Evitare assembramenti con un grande numero di persone      | <input type="radio"/>   | <input type="radio"/>       | <input type="radio"/> |
| e. Utilizzare il repellente per le zanzare                    | <input type="radio"/>   | <input type="radio"/>       | <input type="radio"/> |
| f. Restare a casa se ci si sente male                         | <input type="radio"/>   | <input type="radio"/>       | <input type="radio"/> |
| <hr/>                                                         |                         |                             |                       |
| g. Altre raccomandazioni                                      |                         |                             |                       |

For peer review only

**2. Per quanto è a tua conoscenza, quale delle seguenti modalità contribuisce alla trasmissione o alla diffusione del coronavirus?**

|                                                                                                                           | Sì, si trasmette in questo modo | No, non si trasmette in questo modo | Non saprei            |
|---------------------------------------------------------------------------------------------------------------------------|---------------------------------|-------------------------------------|-----------------------|
| a. Stando in stretta vicinanza fisica con una persona infetta                                                             | <input type="radio"/>           | <input type="radio"/>               | <input type="radio"/> |
| b. Toccando le superfici sulle quali sono presenti piccole quantità di fluidi corporei appartenenti a una persona infetta | <input type="radio"/>           | <input type="radio"/>               | <input type="radio"/> |
| c. Attraverso le punture di zanzara                                                                                       | <input type="radio"/>           | <input type="radio"/>               | <input type="radio"/> |
| d. Attraverso i geni/la genetica                                                                                          | <input type="radio"/>           | <input type="radio"/>               | <input type="radio"/> |

e. In quali altri modi si trasmette o si diffonde il coronavirus? Per piacere, motiva la risposta

---

**3. Per ciascuna delle seguenti voci, indica se la ritieni un sintomo comune dell'infezione da coronavirus (COVID-19)**

|                                     | Sì, è un sintomo      | No, non è un sintomo  | Non saprei            |
|-------------------------------------|-----------------------|-----------------------|-----------------------|
| a. Febbre                           | <input type="radio"/> | <input type="radio"/> | <input type="radio"/> |
| b. Tosse secca                      | <input type="radio"/> | <input type="radio"/> | <input type="radio"/> |
| c. Vomito                           | <input type="radio"/> | <input type="radio"/> | <input type="radio"/> |
| d. Congestione nasale/naso che cola | <input type="radio"/> | <input type="radio"/> | <input type="radio"/> |
| e. Eruzione cutanea                 | <input type="radio"/> | <input type="radio"/> | <input type="radio"/> |

f. Altri sintomi (si prega di descriverli:)

\_\_\_\_\_

For peer review only

1 **4. Ritieni che uno dei seguenti gruppi di persone abbia un rischio maggiore di sviluppare gravi**  
 2 **patologie mediche se viene infettato dal coronavirus?**  
 3

|                                                        | Sì, è a maggior rischio | No, non è a maggior rischio | Non saprei            |
|--------------------------------------------------------|-------------------------|-----------------------------|-----------------------|
| 4 a. Bambini                                           | <input type="radio"/>   | <input type="radio"/>       | <input type="radio"/> |
| 5 b. Donne in gravidanza                               | <input type="radio"/>   | <input type="radio"/>       | <input type="radio"/> |
| 6 c. Persone affette da patologie<br>7 croniche        | <input type="radio"/>   | <input type="radio"/>       | <input type="radio"/> |
| 8 d. Persone che hanno da poco<br>9 superato i 20 anni | <input type="radio"/>   | <input type="radio"/>       | <input type="radio"/> |
| 10 e. Persone obese                                    | <input type="radio"/>   | <input type="radio"/>       | <input type="radio"/> |
| 11 f. Persone oltre i 60 anni                          | <input type="radio"/>   | <input type="radio"/>       | <input type="radio"/> |

12  
 13  
 14  
 15  
 16  
 17 5. Per quanto a tua conoscenza, esiste un vaccino per  
 18 proteggere le persone dall'attuale coronavirus, noto  
 19 anche come COVID-19, oppure no?  Sì  No  Non saprei  
 20

21 6. Per quanto a tua conoscenza, il vaccino contro  
 22 l'influenza o l'influenza stagionale protegge le  
 23 persone dall'attuale coronavirus, noto anche come  
 24 COVID-19, oppure no?  Sì  No  Non saprei  
 25

26 7. Per quanto a tua conoscenza, cosa dovrebbe fare una  
 27 persona che ritenga di aver sviluppato i sintomi del  
 28 coronavirus?  Restare a casa e chiamare un medico o un operatore  
 29 sanitario  
 30  Cercare immediatamente assistenza sanitaria  
 31 recandosi al pronto soccorso o in una struttura di  
 32 emergenza  
 33  Qualcos'altro  
 34  Non saprei

35 7a. Qualcos'altro, per favore specificare  
 36  
 37  
 38  
 39  
 40  
 41  
 42  
 43  
 44  
 45  
 46  
 47  
 48  
 49  
 50  
 51  
 52  
 53  
 54  
 55  
 56  
 57  
 58  
 59  
 60



1 **Sezione 4 - Preoccupazioni ed esperienze nell'ambito della salute**

2  
3 1. Pensi di avere informazioni sufficienti sulle  Sì  No  Non saprei  
4 modalità per proteggere te stesso e la tua famiglia  
5 dal coronavirus?  
6

7 2. Che cosa stai facendo per proteggere te stesso e la  
8 tua famiglia dal coronavirus?  
9 \_\_\_\_\_  
10

11 3. Pensi che la preoccupazione o lo stress legati al  Sì - un notevole impatto  
12 coronavirus abbiano avuto un impatto negativo sulla  Sì - un piccolo impatto  
13 tua salute mentale oppure no?  No  
14  Non saprei  
15

16 3b. Per piacere, motiva la risposta:  
17 \_\_\_\_\_  
18  
19  
20  
21  
22  
23  
24  
25  
26  
27  
28  
29  
30  
31  
32  
33  
34  
35  
36  
37  
38  
39  
40  
41  
42  
43  
44  
45  
46  
47  
48  
49  
50  
51  
52  
53  
54  
55  
56  
57  
58  
59  
60

For peer review only

1 **q4. - In che misura ritieni che ciascuna delle seguenti categorie sia intervenuta efficacemente**  
2 **contro il coronavirus e il COVID-19?**  
3

4 a. Il sistema sanitario (compresi ospedali,  
5 ambulatori, medici, infermieri e altri operatori  
6 sanitari)

- Per nulla efficace  
 Non molto efficace  
 Abbastanza efficace  
 Molto efficace

7  
8  
9 a. Per piacere, motiva la risposta:  
10  
11 \_\_\_\_\_  
12

13  
14 b. La comunità scientifica (compresi ricercatori e  
15 analisti)

- Per nulla efficace  
 Non molto efficace  
 Abbastanza efficace  
 Molto efficace

16  
17  
18  
19 b. Per piacere, motiva la risposta:  
20  
21 \_\_\_\_\_  
22

23 c. Il governo (comprese le autorità locali e  
24 regionali)

- Per nulla efficace  
 Non molto efficace  
 Abbastanza efficace  
 Molto efficace

25  
26  
27  
28 c. Per piacere, motiva la risposta:  
29  
30 \_\_\_\_\_  
31

32 d. Il sistema educativo (comprese scuole primarie,  
33 secondarie e università)

- Per nulla efficace  
 Non molto efficace  
 Abbastanza efficace  
 Molto efficace

34  
35  
36  
37 d. Per piacere, motiva la risposta:  
38  
39 \_\_\_\_\_  
40  
41

42 e. Rivenditori al dettaglio e servizi locali (inclusi  
43 negozi, supermercati, ristoranti)

- Per nulla efficace  
 Non molto efficace  
 Abbastanza efficace  
 Molto efficace

44  
45  
46  
47 e. Per piacere, motiva la risposta:  
48  
49 \_\_\_\_\_  
50

51 f. Le imprese (compresi grande industria, fabbriche,  
52 produttori)

- Per nulla efficace  
 Non molto efficace  
 Abbastanza efficace  
 Molto efficace

53  
54  
55  
56 f. Per piacere, motiva la risposta:  
57  
58 \_\_\_\_\_  
59  
60

1  
2  
3  
4  
5  
6  
7  
8  
9  
10  
11  
12  
13  
14  
15  
16  
17  
18  
19  
20  
21  
22  
23  
24  
25  
26  
27  
28  
29  
30  
31  
32  
33  
34  
35  
36  
37  
38  
39  
40  
41  
42  
43  
44  
45  
46  
47  
48  
49  
50  
51  
52  
53  
54  
55  
56  
57  
58  
59  
60

g. La stampa (inclusi giornalisti, quotidiani, televisione e mezzi di comunicazione visiva)

- Per nulla efficace
- Non molto efficace
- Abbastanza efficace
- Molto efficace

g. Per piacere, motiva la risposta:

\_\_\_\_\_

h. Le piattaforme dei social media

- Per nulla efficace
- Non molto efficace
- Abbastanza efficace
- Molto efficace

h. Per piacere, motiva la risposta:

\_\_\_\_\_

For peer review only

**5. Ammesso che tu sia preoccupato, in quale misura lo sei per ciascuna delle seguenti tematiche?**

|                                                                                                                                                       | Molto preoccupato     | Abbastanza preoccupato | Poco preoccupato      | Per nulla preoccupato | Non saprei            |
|-------------------------------------------------------------------------------------------------------------------------------------------------------|-----------------------|------------------------|-----------------------|-----------------------|-----------------------|
| a. Tu o un membro della tua famiglia potreste contrarre il coronavirus                                                                                | <input type="radio"/> | <input type="radio"/>  | <input type="radio"/> | <input type="radio"/> | <input type="radio"/> |
| b. Subirai una contrazione del reddito perché perderai il posto di lavoro o dovrai fare orari ridotti a causa del coronavirus                         | <input type="radio"/> | <input type="radio"/>  | <input type="radio"/> | <input type="radio"/> | <input type="radio"/> |
| c. Potresti contrarre la malattia di Lyme                                                                                                             | <input type="radio"/> | <input type="radio"/>  | <input type="radio"/> | <input type="radio"/> | <input type="radio"/> |
| d. Il coronavirus avrà un impatto negativo sui tuoi investimenti, per esempio la pensione o i fondi accantonati per gli studi universitari/il college | <input type="radio"/> | <input type="radio"/>  | <input type="radio"/> | <input type="radio"/> | <input type="radio"/> |
| e. Potresti contrarre la febbre dengue                                                                                                                | <input type="radio"/> | <input type="radio"/>  | <input type="radio"/> | <input type="radio"/> | <input type="radio"/> |
| f. Ti esporrai al rischio di contrarre il coronavirus perché non potrai permetterti di restare a casa senza lavorare                                  | <input type="radio"/> | <input type="radio"/>  | <input type="radio"/> | <input type="radio"/> | <input type="radio"/> |
| g. Non potrai permetterti di effettuare il test o i trattamenti per il coronavirus se dovessero rendersi necessari                                    | <input type="radio"/> | <input type="radio"/>  | <input type="radio"/> | <input type="radio"/> | <input type="radio"/> |

h. Se hai ulteriori preoccupazioni, per favore descrivile

---

5b. In quale misura la tua vita è stata sconvolta dall'epidemia di coronavirus, ammesso che lo sia stata?

- Molto  
 Abbastanza  
 Molto poco  
 Per nulla  
 Non saprei

5b. Per favore spiega in quale misura la tua vita è stata sconvolta dall'epidemia di coronavirus, ammesso che lo sia stata?

---

**6. Per favore indica se hai intrapreso una delle seguenti azioni a causa della recente epidemia di coronavirus.**

|                                                                                                                        | Sì                    | No                    | Non saprei            |
|------------------------------------------------------------------------------------------------------------------------|-----------------------|-----------------------|-----------------------|
| a. Ho deciso di annullare i viaggi oppure ho modificato i programmi di viaggio                                         | <input type="radio"/> | <input type="radio"/> | <input type="radio"/> |
| b. Ho acquistato una mascherina protettiva                                                                             | <input type="radio"/> | <input type="radio"/> | <input type="radio"/> |
| c. Ho fatto scorta di prodotti, per esempio alimentari e articoli per la casa                                          | <input type="radio"/> | <input type="radio"/> | <input type="radio"/> |
| d. Ho rimandato o annullato visite mediche                                                                             | <input type="radio"/> | <input type="radio"/> | <input type="radio"/> |
| e. Ho fatto scorta dei farmaci con obbligo di ricetta                                                                  | <input type="radio"/> | <input type="radio"/> | <input type="radio"/> |
| f. Sono rimasto a casa anziché recarmi al lavoro, a scuola o a svolgere le mie abituali attività                       | <input type="radio"/> | <input type="radio"/> | <input type="radio"/> |
| g. Ho rimandato o annullato un intervento medico o un'operazione chirurgica                                            | <input type="radio"/> | <input type="radio"/> | <input type="radio"/> |
| h. Ho annullato i progetti di partecipare a eventi in luoghi affollati, per esempio concerti o manifestazioni sportive | <input type="radio"/> | <input type="radio"/> | <input type="radio"/> |
| i. Mi sono licenziato                                                                                                  | <input type="radio"/> | <input type="radio"/> | <input type="radio"/> |

6b. Per favore, aggiungi qualsiasi ulteriore spiegazione o dettaglio riguardo alle voci sopra elencate

**7. Hai vissuto una delle seguenti esperienze a causa del coronavirus?**

7a. Ho perduto gli introiti derivanti da un lavoro o un'attività  Sì  
 No  
 Non saprei

a. Ho perduto gli introiti derivanti da un lavoro o un'attività, per favore specifica

7b. Non sono riuscito a procurarmi prodotti alimentari  Sì  
 No  
 Non saprei

b. Non sono riuscito a procurarmi prodotti alimentari, per favore specifica

7c. Non sono riuscito a procurarmi prodotti per la pulizia o igienizzante per le mani  Sì  
 No  
 Non saprei

7c. Non sono riuscito a procurarmi prodotti per la pulizia o igienizzante per le mani, per favore specifica

7d. Non sono riuscito a procurarmi i farmaci con obbligo di prescrizione  Sì  
 No  
 Non saprei

d. Non sono riuscito a procurarmi i farmaci con obbligo di prescrizione, per favore specifica

7e. Uno dei membri della tua famiglia è stato molestato, maltrattato o percosso a causa del coronavirus  Sì  
 No  
 Non saprei

7e. Se vi sono state molestie, maltrattamenti o percosse a causa del coronavirus, per favore specifica

8. Quanto scrupolosamente stai rispettando il distanziamento sociale o fisico, quindi resti a casa e lontano dalle altre persone ogni volta che puoi, oppure ti tieni distante dalle altre persone quando sei in un luogo pubblico?  Molto scrupolosamente  
 Abbastanza scrupolosamente  
 Non molto scrupolosamente  
 Non sono per niente scrupoloso

Per favore aggiungi ulteriori commenti sulle tue opinioni ed esperienze di distanziamento sociale o fisico: (domanda aperta)

9. Ti sei sottoposto personalmente al test per il coronavirus oppure no?  Sì, mi sono sottoposto al test  
 No, non mi sono sottoposto al test  
 Non saprei

1 9a. Per coloro che si sono sottoposti al test: qual è  
2 stato il risultato del test per il coronavirus?  
3  Il test è risultato positivo  
4  Il test è risultato negativo  
5  Sono in attesa dell'esito del test

---

6 10. Per coloro che non si sono sottoposti al test: hai  
7 cercato di sottoposti al test per il coronavirus  
8 oppure no?  
9  Sì  
10  No  
11  Non saprei

---

12 11. Per coloro che non si sono sottoposti al test:  
13 pensi che riusciresti a sottoposti al test per il  
14 coronavirus nel caso in cui ritenessi di averne  
15 bisogno oppure no?  Sì  
16  No  
17  Non saprei

---

18 11. Per favore spiega i motivi per cui non pensi che  
19 riusciresti a sottoposti al test per il coronavirus  
20 nel caso in cui ritenessi di averne bisogno \_\_\_\_\_  
21  
22 No translation provided \_\_\_\_\_

---

23 12. Ritieni di avere attualmente - o di aver  
24 recentemente contratto - l'infezione da coronavirus?  
25  Sì  
26  No  
27  Non saprei

---

28 Per favore spiega i motivi per cui ritieni di avere  
29 attualmente - o di aver recentemente contratto -  
30 l'infezione da coronavirus \_\_\_\_\_  
31

---

32 13. Se esistesse un vaccino per impedire che le  
33 persone si ammalassero a causa del coronavirus, ti  
34 faresti vaccinare?  Sì  
35  No  
36  Non saprei

---

37 Per favore spiega i motivi per cui ti faresti  
38 vaccinare se fosse disponibile un vaccino \_\_\_\_\_  
39

---

40 Per favore spiega i motivi per cui non ti faresti  
41 vaccinare se fosse disponibile un vaccino \_\_\_\_\_  
42  
43 \_\_\_\_\_

---

44 Per favore spiega i motivi per cui non sai se ti  
45 faresti vaccinare se fosse disponibile un vaccino \_\_\_\_\_  
46  
47 \_\_\_\_\_  
48

---

49 14. Conosci personalmente qualcuno che ha contratto  
50 l'infezione da coronavirus (o COVID-19) spunta tutte  
51 le voci pertinenti  Sì, un membro della mia famiglia  
52  Sì, un amico  
53  Sì, un vicino di casa  
54  Sì, qualcun'altro  
55  No  
56  Non saprei

---

57 15. Conosci personalmente qualcuno che è deceduto  
58 per aver contratto l'infezione da coronavirus (o  
59 COVID-19) spunta tutte le voci pertinenti  Sì, un membro della mia famiglia  
60  Sì, un amico  
 Sì, un vicino di casa  
 Sì, qualcun'altro  
 No  
 Non saprei

1 16. Le persone parlano o spettegolano di coloro che  
2 hanno contratto l'infezione da coronavirus (o  
3 COVID-19), allo stato attuale o in precedenza, o di  
4 coloro che ritengono essere stati infettati?  
5

- Decisamente sì  
 Probabilmente sì  
 Probabilmente no  
 Decisamente no  
 Non saprei

7 17. Le persone che hanno contratto l'infezione da  
8 coronavirus (o COVID-19) perdono il rispetto o la  
9 considerazione sociale nella loro comunità?  
10

- Decisamente sì  
 Probabilmente sì  
 Probabilmente no  
 Decisamente no  
 Non saprei

11  
12  
13  
14  
15  
16  
17  
18  
19  
20  
21  
22  
23  
24  
25  
26  
27  
28  
29  
30  
31  
32  
33  
34  
35  
36  
37  
38  
39  
40  
41  
42  
43  
44  
45  
46  
47  
48  
49  
50  
51  
52  
53  
54  
55  
56  
57  
58  
59  
60

For peer review only



**Sezione 5 - Domande sul nucleo familiare**

- 1  
2  
3  
4  
5  
6 1. Hai un'automobile di proprietà  Sì  
7  No  
8  Preferisco non rispondere
- 
- 9  
10 2. Hai una casa di proprietà  Sì  
11  No  
12  Preferisco non rispondere
- 
- 13  
14 3. Sei il genitore o il tutore di un minore di età  
15 inferiore a 18 anni che vive nel tuo nucleo  
16 familiare?  Sì  
17  No  
18  Non saprei
- 
- 19 4. La scuola o l'asilo di tuo figlio sono stati chiusi  
20 per alcuni periodi di tempo in conseguenza del  
21 coronavirus oppure no?  Sì  
22  No  
23  Non saprei
- 
- 24 5. Se la scuola o l'asilo di tuo figlio sono  
25 stati/venissero chiusi per due settimane o più in  
26 conseguenza del coronavirus, quanto è stato/sarebbe  
27 difficile per te trovare un modo alternativo per  
28 occuparti dei bambini?  Molto difficile  
29  Un poco difficile  
30  Non molto difficile  
31  Per nulla difficile
- 
- 32 6. Se fossi costretto a restare a casa per la  
33 quarantena oppure perché le scuole o i posti di  
34 lavoro sono chiusi, potresti riuscire a svolgere,  
35 almeno in parte, il tuo lavoro da casa oppure no?  Sì  
36  No  
37  Non applicabile  
38  Non saprei
- 
- 39 6. Per favore spiega in quale modo potresti svolgere  
40 almeno una parte del tuo lavoro restando a casa  
41 \_\_\_\_\_
- 
- 42 6. Per favore spiega come mai ti sarebbe impossibile  
43 svolgere almeno una parte del tuo lavoro restando a  
44 casa \_\_\_\_\_
- 
- 45 7. Tu o uno dei membri del tuo nucleo familiare  
46 lavora in un ambiente che eroga assistenza sanitaria,  
47 per esempio uno studio medico, un ambulatorio, un  
48 ospedale, una casa di riposo o uno studio  
49 odontoiatrico? (spunta tutte le voci pertinenti)  Sì, io  
50  Sì, un membro della mia famiglia  
51  No, nessuno  
52  Non saprei
- 
- 53 8. Quante persone di età inferiore a 18 anni vivono  
54 attualmente nel tuo nucleo familiare? \_\_\_\_\_
- 
- 55 9. Quanti adulti di età superiore a 18 anni vivono  
56 attualmente nel tuo nucleo familiare, compreso tu  
57 stesso? \_\_\_\_\_
- 
- 58 10. Sei tu la persona che ha la responsabilità di  
59 occuparsi dei figli?  Sì  
60  No  
 Non saprei

1 11. Hai la responsabilità di assistere persone  
2 anziane?

- Sì  
 No  
 Non saprei

3  
4  
5 12. Per favore, inserisci alcune informazioni relative  
6 alla tua rete di sostegno sociale (amici, famigliari,  
7 vicini di casa):  
8 \_\_\_\_\_  
9  
10  
11  
12  
13  
14  
15  
16  
17  
18  
19  
20  
21  
22  
23  
24  
25  
26  
27  
28  
29  
30  
31  
32  
33  
34  
35  
36  
37  
38  
39  
40  
41  
42  
43  
44  
45  
46  
47  
48  
49  
50  
51  
52  
53  
54  
55  
56  
57  
58  
59  
60

For peer review only

**Sezione 6: Stress nell'ultimo mese**

|                                                                                                                                                                      | Mai                   | Quasi mai             | Talvolta              | Spesso                | Molto spesso          |
|----------------------------------------------------------------------------------------------------------------------------------------------------------------------|-----------------------|-----------------------|-----------------------|-----------------------|-----------------------|
| 1. Nell'ultimo mese, con quale frequenza sei rimasto turbato a causa di un evento inaspettato?                                                                       | <input type="radio"/> |
| 2. Nell'ultimo mese, con quale frequenza ti è sembrato di non riuscire a tenere sotto controllo gli aspetti importanti della tua vita?                               | <input type="radio"/> |
| 3. Nell'ultimo mese, con quale frequenza ti sei sentito nervoso e "stressato"?                                                                                       | <input type="radio"/> |
| 4. Nell'ultimo mese, con quale frequenza ti sei sentito sicuro nella gestione dei tuoi problemi personali?                                                           | <input type="radio"/> |
| 5. Nell'ultimo mese, con quale frequenza ti è sembrato che tutto andasse per il verso giusto?                                                                        | <input type="radio"/> |
| 6. Nell'ultimo mese, con quale frequenza ti è sembrato di non avere la forza di affrontare tutte le cose che avevi da fare?                                          | <input type="radio"/> |
| 7. Nell'ultimo mese, con quale frequenza sei riuscito a mantenere sotto controllo le seccature nella tua vita?                                                       | <input type="radio"/> |
| 8. Nell'ultimo mese, con quale frequenza ti è sembrato di avere il controllo della situazione?                                                                       | <input type="radio"/> |
| 9. Nell'ultimo mese, con quale frequenza ti sei arrabbiato a causa di eventi al di fuori del tuo controllo?                                                          | <input type="radio"/> |
| 10. Nell'ultimo mese, con quale frequenza ti è sembrato che le difficoltà si stessero accumulando a un livello tale da pensare che non saresti riuscito a superarle? | <input type="radio"/> |
| 11. Per favore, aggiungi ulteriori informazioni riguardo alle tue sensazioni di stress nel corso dell'ultimo mese                                                    | <hr/>                 |                       |                       |                       |                       |

**Sezione 7: Sostegno sociale**

|                                                                                            | In assoluto<br>disaccordo | Molto in<br>disaccordo | Poco<br>d'accordo     | Indifferente          | Abbastanza<br>d'accordo | Molto<br>d'accordo    | Estrema-<br>mente<br>d'accordo |
|--------------------------------------------------------------------------------------------|---------------------------|------------------------|-----------------------|-----------------------|-------------------------|-----------------------|--------------------------------|
| 1. Posso contare su una persona speciale che è disponibile quando ho bisogno d'aiuto       | <input type="radio"/>     | <input type="radio"/>  | <input type="radio"/> | <input type="radio"/> | <input type="radio"/>   | <input type="radio"/> | <input type="radio"/>          |
| 2. Posso contare su una persona speciale con la quale condividere gioie e dolori.          | <input type="radio"/>     | <input type="radio"/>  | <input type="radio"/> | <input type="radio"/> | <input type="radio"/>   | <input type="radio"/> | <input type="radio"/>          |
| 3. La mia famiglia si adopera lealmente per darmi una mano.                                | <input type="radio"/>     | <input type="radio"/>  | <input type="radio"/> | <input type="radio"/> | <input type="radio"/>   | <input type="radio"/> | <input type="radio"/>          |
| 4. Traggo tutto il sostegno e l'aiuto emozionale di cui ho bisogno dalla mia famiglia.     | <input type="radio"/>     | <input type="radio"/>  | <input type="radio"/> | <input type="radio"/> | <input type="radio"/>   | <input type="radio"/> | <input type="radio"/>          |
| 5. Posso contare su una persona speciale che è per me una grande fonte di conforto.        | <input type="radio"/>     | <input type="radio"/>  | <input type="radio"/> | <input type="radio"/> | <input type="radio"/>   | <input type="radio"/> | <input type="radio"/>          |
| 6. I miei amici si adoperano lealmente per darmi una mano                                  | <input type="radio"/>     | <input type="radio"/>  | <input type="radio"/> | <input type="radio"/> | <input type="radio"/>   | <input type="radio"/> | <input type="radio"/>          |
| 7. Quando le cose vanno male posso contare sui miei amici.                                 | <input type="radio"/>     | <input type="radio"/>  | <input type="radio"/> | <input type="radio"/> | <input type="radio"/>   | <input type="radio"/> | <input type="radio"/>          |
| 8. Posso parlare liberamente dei miei problemi con la mia famiglia.                        | <input type="radio"/>     | <input type="radio"/>  | <input type="radio"/> | <input type="radio"/> | <input type="radio"/>   | <input type="radio"/> | <input type="radio"/>          |
| 9. Posso contare su alcuni amici con i quali condividere gioie e dolori.                   | <input type="radio"/>     | <input type="radio"/>  | <input type="radio"/> | <input type="radio"/> | <input type="radio"/>   | <input type="radio"/> | <input type="radio"/>          |
| 10. Nella mia vita posso contare su una persona speciale che ha a cuore i miei sentimenti. | <input type="radio"/>     | <input type="radio"/>  | <input type="radio"/> | <input type="radio"/> | <input type="radio"/>   | <input type="radio"/> | <input type="radio"/>          |
| 11. La mia famiglia è disposta ad aiutarmi a prendere decisioni.                           | <input type="radio"/>     | <input type="radio"/>  | <input type="radio"/> | <input type="radio"/> | <input type="radio"/>   | <input type="radio"/> | <input type="radio"/>          |
| 12. Posso parlare liberamente dei miei problemi con i miei amici.                          | <input type="radio"/>     | <input type="radio"/>  | <input type="radio"/> | <input type="radio"/> | <input type="radio"/>   | <input type="radio"/> | <input type="radio"/>          |

**Sezione 8 - Domande sulla salute**

1. In generale come definiresti la tua salute

- Eccellente  
 Molto buona  
 Buona  
 Discreta  
 Cagionevole

2. Considerando ora la tua salute fisica, che comprende le malattie fisiche e le lesioni, per quanti giorni degli ultimi 30 non hai goduto di buona salute?

\_\_\_\_\_  
((numero di giorni))

3. Considerando ora la tua salute mentale, che comprende lo stress, la depressione e i problemi emozionali, per quanti giorni degli ultimi 30 non hai goduto di buona salute?

\_\_\_\_\_  
((numero di giorni))

4. All'incirca per quanti giorni degli ultimi 30 la cattiva salute fisica o mentale ti ha impedito di svolgere le tue abituali occupazioni, come prenderti cura di te stesso, lavorare o svolgere attività ricreative?

\_\_\_\_\_  
((numero di giorni))

5. Negli ultimi 12 mesi c'è stata un'occasione nella quale avresti avuto bisogno di assistenza sanitaria (per esempio un consulto medico) e non hai potuto permetterlo per il costo eccessivo?

- Sì  
 No  
 Non saprei

6. Tu o uno dei membri del tuo nucleo familiare soffre di una patologia grave, per esempio pressione alta, cardiopatia, disturbi polmonari, cancro o diabete? (spunta tutte le voci pertinenti)

- Sì, io  
 Sì, un membro della mia famiglia  
 No, nessuno  
 Non saprei

7. Quali delle seguenti voci è pertinente al tuo caso

- Sono attualmente in gravidanza  
 Il mio partner è attualmente in gravidanza  
 Né io né il mio partner siamo attualmente in gravidanza

8. Desidereresti restare incinta o avere un bambino il prossimo anno?

- Sì  
 No  
 Non saprei

**Sezione 9: Social media****1. Quale delle seguenti piattaforme dei social media utilizzi? (Spunta la voce più pertinente per ciascuna)**

|              | Uso quotidiano        | Qualche volta alla settimana | Qualche volta al mese | Raramente             | Mai                   |
|--------------|-----------------------|------------------------------|-----------------------|-----------------------|-----------------------|
| a. Facebook  | <input type="radio"/> | <input type="radio"/>        | <input type="radio"/> | <input type="radio"/> | <input type="radio"/> |
| b. Twitter   | <input type="radio"/> | <input type="radio"/>        | <input type="radio"/> | <input type="radio"/> | <input type="radio"/> |
| c. LinkedIn  | <input type="radio"/> | <input type="radio"/>        | <input type="radio"/> | <input type="radio"/> | <input type="radio"/> |
| d. Instagram | <input type="radio"/> | <input type="radio"/>        | <input type="radio"/> | <input type="radio"/> | <input type="radio"/> |
| e. WhatsApp  | <input type="radio"/> | <input type="radio"/>        | <input type="radio"/> | <input type="radio"/> | <input type="radio"/> |
| f. Snapchat  | <input type="radio"/> | <input type="radio"/>        | <input type="radio"/> | <input type="radio"/> | <input type="radio"/> |
| g. Reddit    | <input type="radio"/> | <input type="radio"/>        | <input type="radio"/> | <input type="radio"/> | <input type="radio"/> |

2. Come è cambiato il tuo modo di usare i social media dall'inizio della pandemia di coronavirus?

- Uso molto di più i social media  
 Uso un poco di più i social media  
 Uso i social media più di prima  
 Non saprei

2b. Per favore spiega in quale maniera è cambiato il tuo modo di usare i social media dall'inizio della pandemia di coronavirus:

\_\_\_\_\_

1 **Sezione 10 - Domande demografiche**

2  
3 1. Quanti anni hai ad oggi?

4 \_\_\_\_\_

5  
6 2. Come descriveresti le tue origini etniche?

7  
8 \_\_\_\_\_

9  
10 4. Ti consideri appartenente a uno dei seguenti  
11 gruppi? (spunta tutte le voci pertinenti)

- 12  Messicano
- 13  Portoricano
- 14  Cubano

15 4a. Se ti consideri appartenente a un'altra etnia  
16 ispanica/latino-americana, diversa da quelle sopra  
17 elencate, per favore specificala:

18 \_\_\_\_\_

19 4b. Non mi considero ispanico né latino-americano

- 20  Vero
- 21  Falso

22 5. Quali delle seguenti voci descrive meglio il tuo  
23 grado di istruzione?

- 24  Non ho finito la scuola superiore
- 25  Ho concluso la scuola superiore, il liceo, oppure  
26 conseguito il diploma da privatista (GED)
- 27  Ho frequentato il college/l'università ma non ho  
28 portato a termine gli studi
- 29  Ho conseguito la laurea in un college/università
- 30  Ho un diploma postlaurea del college/università  
31 (laurea magistrale, PhD, laurea in medicina e  
32 chirurgia, ecc.)

**6. Qual è la tua religione attuale? Spunta tutte le voci pertinenti**

|                               | Sì                    | No                    | Preferisco non rispondere |
|-------------------------------|-----------------------|-----------------------|---------------------------|
| a. Cristiana                  | <input type="radio"/> | <input type="radio"/> | <input type="radio"/>     |
| b. Ebraica (giudaismo)        | <input type="radio"/> | <input type="radio"/> | <input type="radio"/>     |
| c. Musulmana                  | <input type="radio"/> | <input type="radio"/> | <input type="radio"/>     |
| d. Buddista                   | <input type="radio"/> | <input type="radio"/> | <input type="radio"/>     |
| e. Induista                   | <input type="radio"/> | <input type="radio"/> | <input type="radio"/>     |
| f. Ateista (non credo in Dio) | <input type="radio"/> | <input type="radio"/> | <input type="radio"/>     |
| g. Altro                      | <input type="radio"/> | <input type="radio"/> | <input type="radio"/>     |
| h. Non saprei                 | <input type="radio"/> | <input type="radio"/> | <input type="radio"/>     |

6g. Altra religione, per favore specifica

\_\_\_\_\_

7. Se risiedi negli USA, per favore indica la razza/etnia alla quale appartieni (spunta tutte le voci pertinenti)

- Indiano americano o originario dell'Alaska
- Asiatico
- Americano di colore o afroamericano
- Nativo delle Hawaii
- Originario delle isole del Pacifico
- Caucasico
- Altro

7. Se hai selezionato altro, per favore specifica la razza/etnia

\_\_\_\_\_

7. A quale delle seguenti categorie ritieni di appartenere?

- Udente/non sordo
- Duro d'orecchi
- sordo
- Sordo
- Sordocieco

Ai fini del presente studio ti preghiamo di fare riferimento alle seguenti definizioni.

Udente/non sordo: persona priva di disturbi dell'udito

Duro d'orecchi: persona con limitati disturbi dell'udito

sordo: persona non udente

Sordo: persona non udente che aderisce alla Cultura dei non udenti

Sordocieco: persona non udente affetta da parziale o totale cecità

9. Quale delle seguenti voci descrive meglio il genere a cui appartieni:

- Maschio
- Femmina
- Altra opzione

q9. Se hai spuntato la casella altra opzione per descrivere il tuo genere, per favore fornisci una spiegazione:

\_\_\_\_\_



1 10. Ritieni di essere (spunta tutte le voci  
2 pertinenti)

- 3  Eterosessuale
- 4  Gay
- 5  Lesbica
- 6  Bisessuale
- 7  Transgender
- 8  Nessuna delle voci sopra elencate

9 10a. Se hai spuntato la casella nessuna delle voci  
10 sopra elencate, per favore specifica

11 \_\_\_\_\_

12  
13  
14  
15  
16  
17  
18  
19  
20  
21  
22  
23  
24  
25  
26  
27  
28  
29  
30  
31  
32  
33  
34  
35  
36  
37  
38  
39  
40  
41  
42  
43  
44  
45  
46  
47  
48  
49  
50  
51  
52  
53  
54  
55  
56  
57  
58  
59  
60

For peer review only

1 **Sezione 11. Domanda conclusiva**

2  
3 1. Per favore indica qualsiasi tua eventuale ulteriore  
4 riflessione riguardo al coronavirus e al COVID-19

5 \_\_\_\_\_  
6  
7  
8  
9  
10  
11  
12  
13  
14  
15  
16  
17  
18  
19  
20  
21  
22  
23  
24  
25  
26  
27  
28  
29  
30  
31  
32  
33  
34  
35  
36  
37  
38  
39  
40  
41  
42  
43  
44  
45  
46  
47  
48  
49  
50  
51  
52  
53  
54  
55  
56  
57  
58  
59  
60

For peer review only

**Sezione 12: Qualità del sondaggio**

**Desideriamo formulare alcune domande in merito al presente questionario per apportare miglioramenti in futuro. Se hai domande particolari che vorresti porre ti preghiamo di copiare e incollare la tua domanda nella casella di testo.**

1. In generale le domande del presente questionario erano "comprensibili". Ciò significa che non hai dovuto leggere le voci più di una volta per comprendere cosa veniva chiesto.

- Per niente d'accordo  
 Non sono d'accordo  
 Non sono d'accordo né in disaccordo  
 Sono d'accordo  
 Sono molto d'accordo

2. Hai trovato alcune specifiche domande particolarmente difficili da capire? In caso affermativo, per favore specifica (meglio che puoi)

\_\_\_\_\_

3. In generale il significato delle domande era chiaro e immediato

- Per niente d'accordo  
 Non sono d'accordo  
 Non sono d'accordo né in disaccordo  
 Sono d'accordo  
 Sono molto d'accordo

4. Hai trovato qualche domanda specifica il cui significato era poco chiaro? In caso affermativo, per favore specifica (meglio che puoi)

- Sì  No

4a. In caso affermativo, per favore specifica (meglio che puoi)

\_\_\_\_\_

5. Le scale utilizzate per graduare le risposte erano adeguate. Ciò significa che le scale proposte consentivano di rispondere in maniera appropriata.

- Per niente d'accordo  
 Non sono d'accordo  
 Non sono d'accordo né in disaccordo  
 Sono d'accordo  
 Sono molto d'accordo

6. A tuo parere, alcune delle risposte erano scritte in maniera tale da indurti a pensare che ci fosse UNA SOLA risposta OVVIA?

- Sì  
 No

6b. Per favore motiva la risposta

\_\_\_\_\_

Inserisci qualsiasi tuo eventuale ulteriore commento riguardo a questo studio

( )

Per ulteriori informazioni sul coronavirus e sul COVID-19, per favore visita i seguenti siti

<http://www.governo.it/it/coronavirus>

<https://www.who.int/> For peer review only - <http://bmjopen.bmj.com/site/about/guidelines.xhtml>

<https://www.cdc.gov/coronavirus/2019-ncov/index.html>

1 <https://www.cdc.gov/>

2  
3  
4  
5  
6  
7  
8  
9  
10  
11  
12  
13  
14  
15  
16  
17  
18  
19  
20  
21  
22  
23  
24  
25  
26  
27  
28  
29  
30  
31  
32  
33  
34  
35  
36  
37  
38  
39  
40  
41  
42  
43  
44  
45  
46  
47  
48  
49  
50  
51  
52  
53  
54  
55  
56  
57  
58  
59  
60

For peer review only

# Reporting checklist for cross sectional study.

Based on the STROBE cross sectional guidelines.

## Instructions to authors

Complete this checklist by entering the page numbers from your manuscript where readers will find each of the items listed below.

Your article may not currently address all the items on the checklist. Please modify your text to include the missing information. If you are certain that an item does not apply, please write "n/a" and provide a short explanation.

Upload your completed checklist as an extra file when you submit to a journal.

In your methods section, say that you used the STROBE cross sectional reporting guidelines, and cite them as:

von Elm E, Altman DG, Egger M, Pocock SJ, Gøtzsche PC, Vandenbroucke JP. The Strengthening the Reporting of Observational Studies in Epidemiology (STROBE) Statement: guidelines for reporting observational studies.

|                           |                     | Reporting Item                                                                                  | Page Number |
|---------------------------|---------------------|-------------------------------------------------------------------------------------------------|-------------|
| <b>Title and abstract</b> |                     |                                                                                                 |             |
| Title                     | <a href="#">#1a</a> | Indicate the study's design with a commonly used term in the title or the abstract              | 2           |
| Abstract                  | <a href="#">#1b</a> | Provide in the abstract an informative and balanced summary of what was done and what was found | 2           |
| <b>Introduction</b>       |                     |                                                                                                 |             |
| Background / rationale    | <a href="#">#2</a>  | Explain the scientific background and rationale for the investigation being reported            | 3           |
| Objectives                | <a href="#">#3</a>  | State specific objectives, including any prespecified hypotheses                                | 4           |
| <b>Methods</b>            |                     |                                                                                                 |             |
| Study design              | <a href="#">#4</a>  | Present key elements of study design early in the paper                                         | 4           |
| Setting                   | <a href="#">#5</a>  | Describe the setting, locations, and relevant dates, including periods of                       | 5           |

recruitment, exposure, follow-up, and data collection

|    |                      |                      |   |
|----|----------------------|----------------------|---|
| 1  |                      |                      |   |
| 2  |                      |                      |   |
| 3  | Eligibility criteria | <a href="#">#6a</a>  | 6 |
| 4  |                      |                      |   |
| 5  |                      |                      |   |
| 6  |                      | <a href="#">#7</a>   | 6 |
| 7  |                      |                      |   |
| 8  |                      |                      |   |
| 9  |                      |                      |   |
| 10 | Data sources /       | <a href="#">#8</a>   | 6 |
| 11 | measurement          |                      |   |
| 12 |                      |                      |   |
| 13 |                      |                      |   |
| 14 |                      |                      |   |
| 15 |                      |                      |   |
| 16 |                      |                      |   |
| 17 | Bias                 | <a href="#">#9</a>   | 5 |
| 18 |                      |                      |   |
| 19 | Study size           | <a href="#">#10</a>  | 5 |
| 20 |                      |                      |   |
| 21 | Quantitative         | <a href="#">#11</a>  | 7 |
| 22 | variables            |                      |   |
| 23 |                      |                      |   |
| 24 |                      |                      |   |
| 25 | Statistical          | <a href="#">#12a</a> | 7 |
| 26 | methods              |                      |   |
| 27 |                      |                      |   |
| 28 |                      |                      |   |
| 29 | Statistical          | <a href="#">#12b</a> | 7 |
| 30 | methods              |                      |   |
| 31 |                      |                      |   |
| 32 |                      |                      |   |
| 33 | Statistical          | <a href="#">#12c</a> | 7 |
| 34 | methods              |                      |   |
| 35 |                      |                      |   |
| 36 |                      |                      |   |
| 37 | Statistical          | <a href="#">#12d</a> | 7 |
| 38 | methods              |                      |   |
| 39 |                      |                      |   |
| 40 |                      |                      |   |
| 41 | Statistical          | <a href="#">#12e</a> | 7 |
| 42 | methods              |                      |   |
| 43 |                      |                      |   |
| 44 | <b>Results</b>       |                      |   |
| 45 |                      |                      |   |
| 46 |                      |                      |   |
| 47 | Participants         | <a href="#">#13a</a> | 8 |
| 48 |                      |                      |   |
| 49 |                      |                      |   |
| 50 |                      |                      |   |
| 51 |                      |                      |   |
| 52 |                      |                      |   |
| 53 |                      |                      |   |
| 54 |                      |                      |   |
| 55 | Participants         | <a href="#">#13b</a> | 5 |
| 56 |                      |                      |   |
| 57 | Participants         | <a href="#">#13c</a> | 5 |
| 58 |                      |                      |   |
| 59 |                      |                      |   |
| 60 |                      |                      |   |

|    |                    |                      |                                                                                                                                                                                                                   |    |
|----|--------------------|----------------------|-------------------------------------------------------------------------------------------------------------------------------------------------------------------------------------------------------------------|----|
| 1  | Descriptive data   | <a href="#">#14a</a> | Give characteristics of study participants (eg demographic, clinical, social) and information on exposures and potential confounders. Give information separately for exposed and unexposed groups if applicable. | 8  |
| 2  |                    |                      |                                                                                                                                                                                                                   |    |
| 3  |                    |                      |                                                                                                                                                                                                                   |    |
| 4  |                    |                      |                                                                                                                                                                                                                   |    |
| 5  |                    |                      |                                                                                                                                                                                                                   |    |
| 6  | Descriptive data   | <a href="#">#14b</a> | Indicate number of participants with missing data for each variable of interest                                                                                                                                   | 8  |
| 7  |                    |                      |                                                                                                                                                                                                                   |    |
| 8  |                    |                      |                                                                                                                                                                                                                   |    |
| 9  |                    |                      |                                                                                                                                                                                                                   |    |
| 10 | Outcome data       | <a href="#">#15</a>  | Report numbers of outcome events or summary measures. Give information separately for exposed and unexposed groups if applicable.                                                                                 | 8  |
| 11 |                    |                      |                                                                                                                                                                                                                   |    |
| 12 |                    |                      |                                                                                                                                                                                                                   |    |
| 13 |                    |                      |                                                                                                                                                                                                                   |    |
| 14 | Main results       | <a href="#">#16a</a> | Give unadjusted estimates and, if applicable, confounder-adjusted estimates and their precision (eg, 95% confidence interval). Make clear which confounders were adjusted for and why they were included          | 11 |
| 15 |                    |                      |                                                                                                                                                                                                                   |    |
| 16 |                    |                      |                                                                                                                                                                                                                   |    |
| 17 |                    |                      |                                                                                                                                                                                                                   |    |
| 18 |                    |                      |                                                                                                                                                                                                                   |    |
| 19 | Main results       | <a href="#">#16b</a> | Report category boundaries when continuous variables were categorized                                                                                                                                             | 8  |
| 20 |                    |                      |                                                                                                                                                                                                                   |    |
| 21 | Main results       | <a href="#">#16c</a> | If relevant, consider translating estimates of relative risk into absolute risk for a meaningful time period                                                                                                      | 11 |
| 22 |                    |                      |                                                                                                                                                                                                                   |    |
| 23 |                    |                      |                                                                                                                                                                                                                   |    |
| 24 |                    |                      |                                                                                                                                                                                                                   |    |
| 25 | Other analyses     | <a href="#">#17</a>  | Report other analyses done—e.g., analyses of subgroups and interactions, and sensitivity analyses                                                                                                                 | 12 |
| 26 |                    |                      |                                                                                                                                                                                                                   |    |
| 27 |                    |                      |                                                                                                                                                                                                                   |    |
| 28 |                    |                      |                                                                                                                                                                                                                   |    |
| 29 | <b>Discussion</b>  |                      |                                                                                                                                                                                                                   |    |
| 30 |                    |                      |                                                                                                                                                                                                                   |    |
| 31 | Key results        | <a href="#">#18</a>  | Summarise key results with reference to study objectives                                                                                                                                                          | 16 |
| 32 |                    |                      |                                                                                                                                                                                                                   |    |
| 33 |                    |                      |                                                                                                                                                                                                                   |    |
| 34 | Limitations        | <a href="#">#19</a>  | Discuss limitations of the study, taking into account sources of potential bias or imprecision. Discuss both direction and magnitude of any potential bias.                                                       | 20 |
| 35 |                    |                      |                                                                                                                                                                                                                   |    |
| 36 |                    |                      |                                                                                                                                                                                                                   |    |
| 37 |                    |                      |                                                                                                                                                                                                                   |    |
| 38 |                    |                      |                                                                                                                                                                                                                   |    |
| 39 | Interpretation     | <a href="#">#20</a>  | Give a cautious overall interpretation considering objectives, limitations, multiplicity of analyses, results from similar studies, and other relevant evidence.                                                  | 21 |
| 40 |                    |                      |                                                                                                                                                                                                                   |    |
| 41 |                    |                      |                                                                                                                                                                                                                   |    |
| 42 |                    |                      |                                                                                                                                                                                                                   |    |
| 43 |                    |                      |                                                                                                                                                                                                                   |    |
| 44 | Generalisability   | <a href="#">#21</a>  | Discuss the generalisability (external validity) of the study results                                                                                                                                             | 21 |
| 45 |                    |                      |                                                                                                                                                                                                                   |    |
| 46 |                    |                      |                                                                                                                                                                                                                   |    |
| 47 | <b>Other</b>       |                      |                                                                                                                                                                                                                   |    |
| 48 | <b>Information</b> |                      |                                                                                                                                                                                                                   |    |
| 49 |                    |                      |                                                                                                                                                                                                                   |    |
| 50 |                    |                      |                                                                                                                                                                                                                   |    |
| 51 | Funding            | <a href="#">#22</a>  | Give the source of funding and the role of the funders for the present study and, if applicable, for the original study on which the present article is based                                                     | 2  |
| 52 |                    |                      |                                                                                                                                                                                                                   |    |
| 53 |                    |                      |                                                                                                                                                                                                                   |    |
| 54 |                    |                      |                                                                                                                                                                                                                   |    |
| 55 |                    |                      |                                                                                                                                                                                                                   |    |

The STROBE checklist is distributed under the terms of the Creative Commons Attribution License CC-BY.

This checklist was completed on 04. November 2020 using <https://www.goodreports.org/>, a tool made by the

[EQUATOR Network](#) in collaboration with [Penelope.ai](#)

For peer review only - <http://bmjopen.bmj.com/site/about/guidelines.xhtml>

# BMJ Open

## Risk of COVID-19-related bullying, harassment, and stigma among health care workers: An analytical cross-sectional global study

|                                 |                                                                                                                                                                                                                                                                                                                                                                                                                                                                                                                                                                                                                                                                                                                       |
|---------------------------------|-----------------------------------------------------------------------------------------------------------------------------------------------------------------------------------------------------------------------------------------------------------------------------------------------------------------------------------------------------------------------------------------------------------------------------------------------------------------------------------------------------------------------------------------------------------------------------------------------------------------------------------------------------------------------------------------------------------------------|
| Journal:                        | <i>BMJ Open</i>                                                                                                                                                                                                                                                                                                                                                                                                                                                                                                                                                                                                                                                                                                       |
| Manuscript ID                   | bmjopen-2020-046620.R2                                                                                                                                                                                                                                                                                                                                                                                                                                                                                                                                                                                                                                                                                                |
| Article Type:                   | Original research                                                                                                                                                                                                                                                                                                                                                                                                                                                                                                                                                                                                                                                                                                     |
| Date Submitted by the Author:   | 14-Dec-2020                                                                                                                                                                                                                                                                                                                                                                                                                                                                                                                                                                                                                                                                                                           |
| Complete List of Authors:       | Dye, Timothy ; University of Rochester Medical Center, Obstetrics and Gynecology; University of Rochester Medical Center, University of Rochester School of Medicine and Dentistry<br>Alcantara, Lisette; University of Rochester Medical Center, Obstetrics and Gynecology<br>Siddiqi, Shazia; University of Rochester Medical Center, Obstetrics and Gynecology<br>Barbosu, Monica; University of Rochester Medical Center, Obstetrics and Gynecology<br>Sharma, Saloni; University of Rochester Medical Center, Obstetrics and Gynecology<br>Panko, Tiffany; University of Rochester Medical Center, Obstetrics and Gynecology<br>Pressman, Eva; University of Rochester Medical Center, Obstetrics and Gynecology |
| <b>Primary Subject Heading</b>: | Public health                                                                                                                                                                                                                                                                                                                                                                                                                                                                                                                                                                                                                                                                                                         |
| Secondary Subject Heading:      | Epidemiology, Global health, Infectious diseases, Mental health                                                                                                                                                                                                                                                                                                                                                                                                                                                                                                                                                                                                                                                       |
| Keywords:                       | COVID-19, PUBLIC HEALTH, Public health < INFECTIOUS DISEASES, EPIDEMIOLOGY                                                                                                                                                                                                                                                                                                                                                                                                                                                                                                                                                                                                                                            |
|                                 |                                                                                                                                                                                                                                                                                                                                                                                                                                                                                                                                                                                                                                                                                                                       |

SCHOLARONE™  
Manuscripts





I, the Submitting Author has the right to grant and does grant on behalf of all authors of the Work (as defined in the below author licence), an exclusive licence and/or a non-exclusive licence for contributions from authors who are: i) UK Crown employees; ii) where BMJ has agreed a CC-BY licence shall apply, and/or iii) in accordance with the terms applicable for US Federal Government officers or employees acting as part of their official duties; on a worldwide, perpetual, irrevocable, royalty-free basis to BMJ Publishing Group Ltd ("BMJ") its licensees and where the relevant Journal is co-owned by BMJ to the co-owners of the Journal, to publish the Work in this journal and any other BMJ products and to exploit all rights, as set out in our [licence](#).

The Submitting Author accepts and understands that any supply made under these terms is made by BMJ to the Submitting Author unless you are acting as an employee on behalf of your employer or a postgraduate student of an affiliated institution which is paying any applicable article publishing charge ("APC") for Open Access articles. Where the Submitting Author wishes to make the Work available on an Open Access basis (and intends to pay the relevant APC), the terms of reuse of such Open Access shall be governed by a Creative Commons licence – details of these licences and which [Creative Commons](#) licence will apply to this Work are set out in our licence referred to above.

Other than as permitted in any relevant BMJ Author's Self Archiving Policies, I confirm this Work has not been accepted for publication elsewhere, is not being considered for publication elsewhere and does not duplicate material already published. I confirm all authors consent to publication of this Work and authorise the granting of this licence.

1  
2  
3 **Risk of COVID-19-related bullying, harassment, and stigma among health care**  
4 **workers: An analytical cross-sectional global study**  
5

6 Timothy Dye, PhD (tim\_dye@urmc.rochester.edu)  
7 Lisette Alcantara, MD (Lisette\_Alcantara@URMC.Rochester.edu)  
8 Shazia Siddiqi, MD (Shazia\_Siddiqi@URMC.Rochester.edu)  
9 Monica Barbosu, MD (Monica\_Barbosu@URMC.Rochester.edu)  
10 Saloni Sharma, MBBS (saloni.sharma@chet.rochester.edu)  
11 Tiffany L. Panko, MD (Tiffany\_Panko@urmc.rochester.edu)  
12 Eva Pressman, MD (Eva\_Pressman@URMC.Rochester.edu)  
13  
14

15  
16 University of Rochester  
17 School of Medicine and Dentistry  
18 Department of Obstetrics and Gynecology  
19 Rochester, New York USA  
20  
21  
22  
23  
24  
25  
26  
27  
28  
29  
30  
31  
32  
33  
34

35 Corresponding author:  
36 Timothy De Ver Dye, PhD  
37 University of Rochester School of Medicine and Dentistry  
38 601 Elmwood Avenue  
39 Rochester, New York USA 14642  
40 585.276.6953  
41 tim\_dye@urmc.rochester.edu  
42  
43

44 Keywords: COVID-19, Stigma, Healthcare Providers, Workforce, Global, Mixed Methods,  
45 Qualitative, Quantitative, Bullying  
46  
47

48 Word count: 6935  
49  
50  
51  
52  
53  
54  
55  
56  
57  
58  
59  
60

## ABSTRACT

**Objectives:** Essential health care workers (HCW) uniquely serve as both COVID-19 healers and, potentially, as carriers of SARS-CoV-2. We assessed COVID-19-related stigma and bullying against HCW controlling for social, psychological, medical, and community variables.

**Design:** We nested an analytical cross-sectional study of COVID-19-related stigma and bullying among HCW within a larger mixed-methods effort assessing COVID-19-related lived experience and impact. Adjusted Odds Ratios (aOR) and 95% confidence intervals evaluated the association between working in health care settings and experience of COVID-19-related bullying and stigma, controlling for confounders. Thematic qualitative analysis provided insight into lived experience of COVID-19-related bullying.

**Setting:** We recruited potential participants in four languages (English, Spanish, French, Italian) through Amazon Mechanical Turk's online workforce and Facebook.

**Participants:** Our sample included 7,411 people from 173 countries who were age 18 or over.

**Findings:** HCW significantly experienced more COVID-19-related bullying after controlling for the confounding effects of job-related, personal, geographic, and sociocultural variables (aOR: 1.5; 95%CI: 1.2, 2.0). HCW more frequently believed that people gossip about others with COVID-19 (OR: 2.2; 95%CI: 1.9, 2.6) and that people with COVID-19 lose respect in the community (OR: 2.3; 95%CI: 2.0, 2.7), both which elevate bullying risk (OR: 2.7; 95% CI: 2.3, 3.2, and OR: 3.5; 95% CI: 2.9, 4.2, respectively). The lived experience of COVID-19-related bullying relates frequently to public identities as HCW traverse through the community, intersecting with other domains (e.g., police, racism, violence).

**Interpretation:** After controlling for a range of confounding factors, HCW are significantly more likely to experience COVID-19-related stigma and bullying, often in the intersectional context of racism, violence, and police involvement in community settings.

## Funding

This work was funded by The Richard W. & Mae Stone Goode Foundation, Award # 057843-002. Drs. Sharma and Alcantara are trainees in the University of Rochester's Translational Biomedical Science PhD Program, which is supported by Grant 2TL1TR002000-05 from the National Center for Advancing Translational Sciences, National Institutes of Health. Dr. Alcantara is additionally supported by funds from BWF1014095 from the Burroughs Wellcome Fund. Drs. Siddiqi and Panko are supported by the National Institute of General Medical Sciences of the National Institute of Health under Award Number K12GM106997. We also accessed the recruitment and REDCap resources of the University of Rochester CTSA, award number UL1 TR002001 from the National Center for Advancing Translational Sciences of the National Institutes of Health. The funders had no role in the study design, data collection and analysis, decision to publish, or preparation of this manuscript.

## Article Summary: Strengths and limitations of this study

- A large, mixed method global assessment of COVID-19-related stigma and bullying with 7,411 research participants from 173 countries.
- Research participants accessed the study through a recruitment link distributed through Amazon's mTURK and Facebook, Instagram, and the Facebook Audience Network.
- Study was conducted in the four predominant languages (Spanish, Italian, French, and English) where COVID-19 was most prevalent at the time of data collection.
- People without access to the internet or to these tools were unable to participate in this study.
- COVID-19-related stigma and bullying was assessed with three questions developed and tested for this study to categorize perception and experience, but we did not use more lengthy, multi-item scales that may provide nuanced information about bullying and stigma.

## INTRODUCTION

Stigma refers to a set of social processes invoked to label, separate, and discriminate against others in a way that interferes with that individual's (or group's) life chances and opportunities.(1, 2) Stigma in the context of health care represents a major barrier to sustain access to care while assuring equity and quality of services. Individual or collective beliefs and behaviors around a specific diagnosis resulting in any type of social discrimination and moral discredit prevent people from seeking care in a timely manner or even at all.

Consequently, stigma has a negative impact on health outcomes aggravated by the mental health implications and social isolation that challenge public health initiatives targeting solutions for health concerns.(3) (4)

Worldwide, health care workers also suffer the negative actions that are the result of stigmatization, such as harassment and violent attacks inside and outside of their workplace compounded by the long working hours, psychological distress, fatigue, and occupational burnout that often is intrinsic to their jobs. Stigma and harassment resulting in bullying and violence against health care workers could constitute a human rights violation,(5) with clear impacts on the workers themselves, their social and work environments, and patients.(6)

Many incidents of violence, harassment, or stigmatization have been reported against health care workers, patients, and medical infrastructure in relation to the COVID-19 pandemic; of these recorded incidents of violence and harassment, 67% of those events were directed at health care workers.(7) Some of these incidents include verbal and physical assault, such as patients who have deliberately coughed or spat on health care workers. These acts of violence have been shown to increase the levels of stress and, consequently, to exacerbate psychological sequelae resulting from moral injuries. People who have suffered discrimination and stigma are at elevated risk for mental illness, including anxiety, depression, PTSD, and suicidality.(8)

The global health emergency as a result of the COVID-19 pandemic has triggered a social crisis marked by discriminatory behaviors and stigma against people perceived as suspect, diagnosed, or have survived the virus. Ironically, despite their role in caring for people with COVID-19, health care workers are no exception to experiencing stigma.(9) During outbreaks of infectious diseases, frontline personnel are often stigmatized by people in their

1  
2 communities due to fear that they are sources of infection.(10) Studies report that while often  
3  
4 risking their own lives in exposing themselves to infection while delivering care, health care  
5  
6 workers also experience stigma such as the denial of services, housing, verbal abuse or  
7  
8 gossip, and social devaluation. Moreover, their family members face 'secondary' or  
9  
10 'associative' stigma.(11)

11  
12 During the COVID-19 pandemic, fear, panic, misinformation about how SARS-CoV-2 (the  
13  
14 virus that causes COVID-19) can spread, and misplaced anger are been described as some  
15  
16 of the reasons people attack and abuse health care personnel.(12) In the same context, in  
17  
18 Mexico the rapid increase of COVID-19 cases have led to a series of violence incidents  
19  
20 against health care workers accused of spreading the virus. Reports describe health care  
21  
22 workers being threatened, beaten, sprayed with bleach, and even evicted from their  
23  
24 homes.(13)

25  
26 While it is clear that health care workers experience bullying and stigma relating to COVID-19  
27  
28 around the world, little is known about how this risk in health care workers differs from others  
29  
30 in the community, especially controlling for other factors that may also be potentially  
31  
32 stigmatizing or lead to bullying incidents. We sought to examine bullying against health care  
33  
34 workers quantitatively to better identify the interaction of health care workers and bullying in  
35  
36 the context of other factors, but also qualitatively to help examine the lived experience of  
37  
38 bullying among health care workers around the world.

## 39 40 **MATERIALS AND METHODS**

### 41 42 43 **Study Design**

44  
45 We nested an analytical cross-sectional study within a larger mixed-methods effort assessing  
46  
47 COVID-19-related lived experience and impact around the world.(14) To evaluate the  
48  
49 associations of interest, we *a priori* included assessment of lived experience relating to  
50  
51 COVID-19-related bullying, harassment, hurt, and stigma, and also included assessment of  
52  
53 whether or not the respondent or someone in their household worked in a health care setting.  
54  
55 The cross-sectional design suited our needs for rapid deployment and large-scale distribution  
56  
57 around the world, reaching potential research participants through several social media  
58  
59 platforms.

1  
2  
3  
4 The parent study was guided by the Critical Medical Ecological model,(15) accounting for the  
5 sociocultural, biological, health care, abiotic data, and power dynamics across the domains of  
6 individuals, households, and communities in six world regions (Africa, Asia, Europe, Latin  
7 America and the Caribbean, Northern America, and Oceania).  
8  
9

10  
11  
12 We used the STROBE cross sectional checklist when writing this report(16) along with the  
13 Consolidated Criteria for Reporting Qualitative Research (COREQ)(17) guidelines.  
14  
15

### 16 17 **Setting**

18  
19 We implemented this study online and globally through the University of Rochester's  
20 installation of REDCap (v. 9.9.2, Vanderbilt University) in English, Spanish, French, and  
21 Italian, which reflected the primary languages found in the parts of the world where the most  
22 COVID-19 cases were emerging during the period of this study (April 6, 2020 to May 29,  
23 2020).(18) Data collection was stopped once we reached our sample size goals.  
24  
25  
26  
27  
28

### 29 **Sample Size**

30  
31 The *a priori* sample size for the parent study recruited participants from six geographic  
32 regions(19) (Africa, Asia, Europe, Northern America, Latin America and the Caribbean, and  
33 Oceania) based on the International Standard Organization (ISO) 3166 Country Codes(20) of  
34 participant residence. This estimation yielded 380 participants required per region, which we  
35 inflated by 50% (to 570), to account for multivariate analysis, missing data, and sub-analyses.  
36 For this particular nested analysis, we conducted a *post hoc* power computation and  
37 estimated that with a 99% two-sided confidence interval that our sample size exceeded 80%  
38 power to detect an effect size of at least 1.5 with normal approximation and continuity  
39 correction (JMP Pro 15.0.0 (SAS Institute Inc., Cary, NC)).  
40  
41  
42  
43  
44  
45  
46  
47

### 48 **Respondents**

49  
50 Participants were recruited through two social media platforms: 1) the Amazon Mechanical  
51 Turk ("mTURK") online workforce(21) and 2) through Facebook, Instagram, and the  
52 Facebook Audience Network.(22) Facebook's platforms are widely accessible globally and  
53 frequently are used survey research.(22) mTURK enables access to a multilingual digital  
54 workforce, providing the ability to recruit global research participants, including those without  
55  
56  
57  
58  
59

1  
2 Facebook platform access.(21) Inclusion criteria included self-identification as age 18 and  
3 older and able to complete the survey in English, Spanish, French, or Italian. Participants  
4 recruited through mTURK and Facebook were routed to the REDCap survey in the language  
5 of recruitment (English, Spanish, French, Italian), were presented with the RSRB-approved  
6 Information Sheet in that language, provided consent to continue, and were asked to confirm  
7 their age and country of residence. To accommodate their role as a digital workforce to reach  
8 harder-to-access populations, mTURK respondents were paid between \$1.00 to \$3.00 for  
9 participation.(23, 24) Facebook or Instagram respondents were not compensated. Additional  
10 recruitment details are available elsewhere.(25) In total, 7,411 individuals (40% recruited  
11 through mTURK, and 60% recruited from Facebook) represented 173 countries that were  
12 included in the final sample.  
13  
14  
15  
16  
17  
18  
19  
20  
21

## 22 **Measures**

23 This nested study included question formats around COVID-19-specific actions, perceptions,  
24 and experiences mostly derived from the Kaiser Family Foundation (KFF)'s Coronavirus  
25 Poll,(26) or that were constructed and tested by the project team for flow and  
26 understandability (see Supplementary Material for instruments in English (Supplementary File  
27 1), Spanish (Supplementary File 2), French (Supplementary File 3), and Italian  
28 (Supplementary File 4)). Personal experience with COVID-19 included testing, perception of  
29 infection, adherence to prevention strategies and recommendations (masking, social-physical  
30 distancing, working from home), and COVID-19-related morbidity or mortality in friends,  
31 family, or neighbors. Socio-demographic measures included age, gender, education,  
32 ownership of material assets (car and home), country of residence (mapped to region), and  
33 social media use. Household-related responsibilities included care for elderly and care for  
34 children, and health variables included the presence of a chronic health condition in the  
35 participant or in a household member.  
36  
37  
38  
39  
40  
41  
42  
43  
44  
45  
46  
47

48 The primary exposure of interest was whether or not the participant worked in a health care  
49 setting, the focus of this analysis. We assessed this by asking the KFF Coronavirus Poll(26)  
50 question: *Do you or anyone in your household work in a health care delivery setting, such as*  
51 *a doctor's office, clinic, hospital, nursing home, or dentist's office?*  
52  
53  
54  
55  
56

## 57 **Outcome: COVID-19-related Harassment, Bullying, and Stigma**



1  
2 The primary outcome for this nested analysis was COVID-19-related harassment and  
3 bullying. To assess this phenomenon, we created and tested the following question: *Have*  
4 *you or a family member been harassed, bullied, or hurt because of coronavirus?* Response  
5 options to this question were “yes,” “no,” and “don’t know.” To identify specifically those who  
6 had perceived they or a family member were harassed, bullied, or hurt, we consolidated “no”  
7 and “don’t know” into one category, and “yes” into another. If the participant indicated that  
8 they or a family member had been harassed, bullied, or hurt because of coronavirus they  
9 were subsequently asked to explain their response (open-ended).  
10  
11  
12  
13  
14  
15

16  
17 Of secondary interest in our analysis is the ascertainment of participant perception of  
18 coronavirus stigma. We adapted two stigma questions from STRIVE(27) for this purpose: *Do*  
19 *people talk badly or gossip about other people who are living with, have had, or are thought*  
20 *to have coronavirus infection (or COVID-19)?* and *Do people who have had coronavirus*  
21 *infection (or COVID-19) lose respect or status in the community?* Participant responses to  
22 both questions were “Definitely Yes,” “Probably Yes,” “Probably Not,” “Definitely Not,” and  
23 “Don’t Know.” In analysis, these questions were reduced to two categories: “Definitely” or  
24 “Probably Yes” in one category, and the other options in another.  
25  
26  
27  
28  
29  
30  
31

32  
33 **Statistical Analysis.** All variables included in this study were cross-tabulated with the  
34 predictor variable of interest (Health care worker) and the primary outcome (COVID-19-  
35 related harassment or bullying). Numbers and percentages are used to display distribution  
36 and Pearson’s chi-square analyses and their associated p-values are used to compute and  
37 display significance.  
38  
39  
40  
41  
42

43 Logistic regression was used to compute Odds Ratios (OR) for COVID-19-related  
44 harassment or bullying by health care worker status, with the OR point estimate and 95%  
45 confidence interval (95% CI) conveying magnitude and certainty of the association. Following  
46 Hosmer and Lameshow’s approach,(28) variables marginally (or more) associated with both  
47 the predictor and outcome variables ( $p < 0.10$ ) were included in a multivariate logistic  
48 regression to assess potential confounding. Additionally, to address collinearity, only  
49 variables with a Variance Inflation Factor (VIF) value  $< .05$  were retained in the model.  
50 Variables not displaying linearity with the predictor and outcome variables were excluded  
51 from the multivariate analysis. The Hosmer and Lameshow Goodness-of-Fit statistic was  
52  
53  
54  
55  
56  
57  
58  
59

1  
2 used to assess the degree to which the data fit the final model. We used a forward stepwise  
3 conditional approach for assessing and including variables in the multivariate model, aiming  
4 to achieve a parsimonious, explanatory model. IBM SPSS Statistics (v25) was used for  
5 analysis. The significance level of all tests was set at 5%. Records missing data were  
6 excluded from bivariate and multivariate analyses.  
7  
8  
9

10  
11  
12 **Qualitative Coding and Analysis.** In total, 327 participant-level open-ended responses  
13 explaining COVID-19-related harassment and bullying situations and perspectives were  
14 coded by a team of coders. Responses were translated into English and coding was  
15 conducted in English. A review of qualitative responses generated an eleven-item codebook.  
16 Coders applied codes to all qualitative responses, discussing and resolving differences in  
17 code application. Descriptive analysis of qualitative codes is presented to denote magnitude  
18 of response to identify themes, and direct quotations from health care workers are presented  
19 to illustrate examples of those themes. Participant quotes are edited only occasionally when  
20 there are clear spelling, punctuation, or usage errors that impede understanding. Any  
21 potentially identifying or stigmatizing details, including country, are deleted or masked.  
22  
23  
24  
25  
26  
27  
28  
29  
30

31 **Ethical Review.** This study was performed in accordance with the ethical standards  
32 established by the 1964 Declaration of Helsinki and its later amendments. The University of  
33 Rochester's Research Subjects Review Board determined that this study met federal and  
34 University criteria for exemption (STUDY00004825). All participants provided informed  
35 consent to engage in this research after a review of a detailed Information Sheet presented in  
36 English, French, Spanish, or Italian at the beginning of the REDCap survey. Participants  
37 could skip any question in the survey except age and country of residence. All staff  
38 associated with this study completed CITIProgram's Research, Ethics, and Compliance  
39 Training.  
40  
41  
42  
43  
44  
45  
46  
47  
48

### 49 **Public Involvement**

50 The instrument for this study was pretested and subsequently edited with a non-random  
51 selection of public participants. Public comments were allowed on social media recruitment  
52 materials and advertisements about the topic, the study, and participation. Publications that  
53 result from this study will be disseminated back to the public via social media channels.  
54 Finally, we included an evaluation of the survey experience at the end of the REDCap  
55  
56  
57  
58  
59  
60

1  
2 encounter, which allowed participants to communicate their thoughts and experiences about  
3 answering the questions and participating in this work. Public input on the survey and  
4 experience were considered in shaping the results and interpretations from this project.  
5  
6  
7

## 8 **RESULTS**

9  
10 In total, 595 participants in this study (8.0% of the total sample size) indicated they or a family  
11 member experienced COVID-19-related harassment, bullying, or hurt, and 837 participants  
12 (11.3% of the total sample size) indicated they worked in a health care delivery setting, such  
13 as a doctor's office, clinic, hospital, nursing home, or dentist's office.  
14  
15  
16  
17

18  
19 Overall, shown in Table 1, people who worked in health care settings were significantly more  
20 likely to believe they have – or have had – coronavirus infection, or COVID-19 (OR: 2.7; 95%  
21 CI: 2.2, 3.3) than their counterparts who did not work in a health care setting. In fact, people  
22 who work in health care settings are also significantly more likely than others to have actually  
23 tested positive for COVID-19 (OR: 2.2; 95%CI: 1.4, 3.4). Participants receiving positive  
24 COVID-19 test results were significantly more likely to experience COVID-19-related bullying  
25 (OR: 4.8; 95% CI: 3.0, 7.7), as were participants generally who believed they had had  
26 COVID-19 previously (OR: 5.4; 95% CI: 4.4, 6.6).  
27  
28  
29  
30  
31  
32  
33

34  
35 Health care workers were less likely to follow social-physical distancing compared with  
36 participants who were not health care workers (OR: 0.7; 95% CI: 0.6, 0.9), and were less  
37 likely to be able to do their jobs from home (OR: 0.4; 95% CI: 0.4, 0.5). Both of these factors  
38 were related similarly to COVID-19-related bullying: people less likely to follow social-physical  
39 distancing closely (OR: 1.8; 95% CI: 1.4, 2.3) and those who could not do their jobs from  
40 home (OR: 1.3; 95% CI: 1.1, 1.5) were more likely to experience bullying than were other  
41 participants.  
42  
43  
44  
45  
46  
47

48  
49 While there were no significant differences between age and gender distribution between  
50 health care workers and other workers, health care workers were more likely to have  
51 education beyond high school (OR:1.9; 95%: 1.4, 2.4). Education level (years of education  
52 completed) was not associated with COVID-19-related harassment and bullying in either  
53 health care workers or non-health care workers (p=0.103, p=0.312, respectively; data not  
54 shown). Age was not related to experiencing COVID-19-related harassment or bullying.  
55  
56  
57  
58  
59  
60

1  
2 Participants identifying as a gender other than male or female were more likely to experience  
3 COVID-19 bullying (OR: 5.7; 95% CI: 5.7; 95% CI: 2.9, 11.6).  
4  
5

6  
7 Health care workers were more likely to procure and wear a mask than non-health care  
8 workers (OR: 1.3; 95% CI: 1.1, 1.5); mask-wearers were protected, however, from COVID-19-  
9 related harassment and bullying (OR: 0.7; 95% CI: 0.6, 0.8). Health care workers were  
10 significantly more likely to know a family member, friend, or neighbor who has had COVID-19  
11 (OR: 2.8; 95% CI: 2.4, 3.2) and to know someone who has died from COVID-19 (OR: 4.0;  
12 95% CI: 3.4, 4.8). Having a family member, friend, or neighbor die from COVID-19 was also a  
13 risk factor for COVID-19-related harassment and bullying (OR: 4.1; 95% CI: 3.3, 5.0), as was  
14 knowing someone who had had COVID-19 (OR: 2.5; 95% CI: 2.1, 3.0).  
15  
16  
17  
18  
19  
20  
21

22  
23 Health care workers were more likely to use social media daily than other workers (OR: 1.3;  
24 95% CI: 1.1, 1.5). However, people who used social media daily were significantly less likely  
25 to experience COVID-19-related bullying (OR: 0.6; 95% CI: 0.5, 0.7).  
26  
27  
28

29  
30 Asia (16.0%), Africa (13.6%), Northern America (12.1%), and Latin America and the  
31 Caribbean (11.4%) had the highest proportions of health care workers that participated in our  
32 study, while Europe (6.2%) and Oceania (6.9%) had the lowest. East Africa (16.7%), South  
33 Asia (17.0%), and the Caribbean (14.7%) were subregions with the highest proportion of  
34 health care workers. Participants in Africa, Asia, Northern America, and Oceania as a cluster  
35 of higher-prevalence regions were significantly more likely to experience COVID-19-related  
36 bullying than were Latin America and Europe as a cluster of lower-prevalence regions (OR:  
37 1.9; 95% CI: 1.6, 2.3). Sub-Saharan Africa (14.0%), Southern Asia (10.7%), and Northern  
38 America (10.6%) had the highest rates of participant experiences of COVID-19-related  
39 bullying.  
40  
41  
42  
43  
44  
45  
46  
47

48  
49 Health care workers were significantly more likely to have a chronic illness than were non-  
50 health care workers (OR: 2.0; 95% CI: 1.7, 2.4), and also are more likely to have someone in  
51 their household with a chronic disease (OR: 1.5; 95% CI: 1.3, 1.8). Those with chronic  
52 illnesses themselves (OR: 1.9 ; 95% CI: 1.6, 2.3) were more likely to experience COVID-19-  
53 related bullying.  
54  
55  
56  
57  
58  
59  
60

1  
2 Health care workers were more likely to have child care responsibilities (OR: 1.8; 95% CI:  
3 1.6, 2.1) and elder care responsibilities (OR: 2.6; 95% CI: 2.2, 3.0) than were non-health care  
4 workers. Both groups – those with child care responsibilities and those with elder care  
5 responsibilities – were at greater risk for COVID-19-related bullying (OR: 1.9; 95% CI: 1.6,  
6 2.2 and OR: 2.2; 95% CI: 1.9, 2.7, respectively).  
7  
8  
9  
10

11  
12 Health care workers were more likely to have access to material assets, being more likely to  
13 own both a car (OR: 1.5; 95% CI: 1.3, 1.8) and a home (OR: 1.4; 95% CI: 1.2, 1.6) than were  
14 non-health care workers. Neither car ownership nor home ownership, however, was related  
15 to COVID-19-related bullying.  
16  
17  
18  
19

### 20 21 Stigma

22 Overall, 27.3% of participants believed that people talk badly or gossip about other people  
23 who are living with, have had, or are thought to have COVID-19, and 21.9% of participants  
24 believed people who have had COVID-19 lose respect or status in the community.  
25  
26

27 Perceptions of COVID-19 stigma varied considerably around the world: participants from Asia  
28 (39.2%), Africa (37.8%), and Latin America and the Caribbean (33.6%) were more likely to  
29 believe that people talk badly or gossip about other people who are living with, have had, or  
30 are thought to have COVID-19 than did participants in Europe (21.7%), Northern America  
31 (16.5%), and Oceania (16.0%). Similarly, participants from Asia (34.1%), Africa (29.6%), and  
32 Latin America and the Caribbean (29.0%) were more likely to note that people who have had  
33 COVID-19 lose respect or status in the community than did participants in Europe (11.9%),  
34 Northern America (14.8%), and Oceania (11.9%).  
35  
36  
37  
38  
39  
40  
41  
42

43 Health care workers were more likely to believe that people talk badly or gossip about other  
44 people who are living with, have had, or are thought to have COVID-19 (OR: 2.2; 95% CI:  
45 1.9, 2.6) and that people who have had COVID-19 lose respect or status in the community  
46 (OR: 2.3; 95% CI: 2.0, 2.7). People who hold such beliefs are more likely to have  
47 experienced COVID-19-related harassment or bullying: those believing that people with  
48 COVID-19 are talked badly or gossiped about were significantly more likely to have  
49 experienced COVID-19-related bullying (OR: 2.7; 95% CI: 2.3, 3.2), as do people who feel  
50 others with COVID-19 lost respect or status in the community (OR: 3.5; 95% CI: 2.9, 4.2).  
51 People who believe they have had COVID-19 infection themselves, know someone who's  
52  
53  
54  
55  
56  
57  
58  
59

1 had COVID-19, or knows someone who's died from COVID-19 are all significantly more likely  
2 to believe people are talked badly about or gossiped or that they lose status and respect in  
3 the community (data not shown).  
4  
5  
6  
7

### 8 Multivariate Model

9 Shown in Table 2, people who work in health care settings are significantly more likely to  
10 experience COVID-19-related harassment, bullying, or hurt (OR: 2.9; 95% CI: 2.3, 3.5), even  
11 after controlling for the confounding effects of not being able to work from home, having had  
12 COVID-19 themselves, not having closely followed social-physical distancing, having a family  
13 member, friend, or neighbor with or die from COVID-19, having at least one chronic disease,  
14 having child and elder care responsibilities, and residing in Africa/ Asia/ Northern America/  
15 Oceania (aOR: 1.5; 95% CI: 1.2, 2.0). Finally, the lack of significance in the Hosmer and  
16 Lameshow Goodness-of-Fit statistic indicates the data fits the model well ( $p=0.990$ ; data not  
17 shown).  
18  
19  
20  
21  
22  
23  
24  
25  
26  
27

### 28 Qualitative

29 The code most commonly applied to qualitative excerpts describing harassing/ bullying/  
30 hurtful experiences related to COVID-19 was "Happened in/ related to community," noted by  
31 109 participants (Table 3). This broad code encompasses a range of types of experiences.  
32 For instance, some community-related bullying commonly applies to people who are  
33 suspected of having COVID-19, perhaps through experiencing one of COVID-19's symptoms:  
34  
35  
36  
37  
38

39 *One relative had fever and villagers thought it was for coronavirus. They wanted to*  
40 *lock the house and hand over [her] to police. Later on the matter was solved. People*  
41 *are being harsh to a suspected COVID-19 patient. (Participant from South Asia)*  
42  
43

44 *I have COPD and allergies. People would get very mean if I coughed or sniffled. That*  
45 *is one of the major reasons I'm home. (Male participant, 60s, from North America)*  
46  
47

48 *Coughed while using public transportation. Was almost put out...* (Female participant,  
49 40s, from the Caribbean)  
50

51 *Si estornudas aunque tengas la mascarilla y te tapes con el antebrazo la gente te*  
52 *habla y te mira mal. (If you sneeze even if you have the mask and cover yourself with*  
53 *your forearm, people talk to you and look at you badly.) (Female participant in her 20s,*  
54 *from the Caribbean)*  
55  
56  
57  
58  
59  
60

1  
2 *My grandchild was outside with his father walking around the building, just to get a*  
3 *fresh air, no one was around. the [ ] premises have a locked fence usually. and some*  
4 *"good neighbours called the police and they came, didn't get fined though, but got*  
5 *warning. It is so much for solidarity... (Southwestern Europe, Female participant, 60s)*  
6

7  
8 Often, community-related COVID-19-related bullying/ experiences relate to an individual's  
9 perception of support (or lack thereof) regarding adherence to (or not) of prevention  
10 strategies:  
11

12  
13  
14 *Too many science illiterate people criticizing and mocking scientists because they do*  
15 *not understand the job that we do, and would rather believe in conspiracy theories.*  
16 *(Male participant, in his 20s, from the Caribbean)*  
17

18  
19 *The [people] criticizing the government approach openly, both scientists, medical*  
20 *professionals, and ordinary people, have been ostracized here up until now. Many lose*  
21 *friends and are accused almost of "treason" when we care about the lives of our fellow*  
22 *citizens. (Female participant, in her 50s, Scandanavia)*  
23

24  
25 *Subject to verbal abuse for leaving home. Public hysteria is such that many now*  
26 *labour under the misguided notion that stepping outside will lead to certain death. The*  
27 *media have exacerbated this and the government have done nothing to curb it.*  
28 *(Female participant, in her 50s, Northern Europe)*  
29

30  
31 *Claro al no tener miedo no sigo las recomendaciones y eso molesta a algunos (Of*  
32 *course, not being afraid, I do not follow the recommendations and that annoys some)*  
33 *(Male participant, in his 40s, Central America)*  
34

35  
36 *Aggressed by people screaming "Stay at home" when you just do some jogging on*  
37 *your own, people calling the police because a child is outside playing alone in a*  
38 *condominium space. (Male participant, 70s, Southern Europe)*  
39

40 One environment that emerges as a common site of COVID-19-related harassment/ bullying  
41 is the supermarket or other types of stores. Participants commonly note that encounters in  
42 the store environment can become contentious:  
43

44  
45  
46 *The staff at the grocery store told me that my ADA covered disability, "does not matter"*  
47 *because of COVID-19. I reported them. (Female participant, 60s, North America)*  
48

49  
50 *My mother was told off for driving to the supermarket so I could put groceries in her*  
51 *boot. This was by a neighbor... (Female participant, 50s, Oceania)*  
52

53  
54 *Grocery shopper thought I wasn't using proper social distancing. (Male participant, 50s*  
55 *Northern America)*

56  
57 *Was pushed in a Dollar General store over toilet paper... (Female participant, 50s,*  
58 *Northern America)*  
59

1  
2  
3 *I have witnessed people in the grocery store totally loose it when another person got*  
4 *too close. (Male participant, 70s, Northern America)*  
5

6  
7 *Some animal coughed over my wife. Store security arrested him and the police took*  
8 *the mongrel away. My wife has had to be tested each day for a week to ensure she*  
9 *had not contracted the virus. Happily, she did not test positive... (Male participant, 60s,*  
10 *Oceania)*  
11

12 *I went to a secondary supermarket in my town and was harassed by the shop guard;*  
13 *he felt that it was only appropriate for one person in a household to do the weekly*  
14 *shopping. I pay for my food, and my roommate pays for hers. Since we were at the*  
15 *store together, he felt that he would mess with us. (Male participant, 40s, Northern*  
16 *Europe)*  
17  
18

19 *Because I became a Person under Monitoring (a suspect case), neighbors were*  
20 *unwilling to talk to me in person. When I got to the convenience store, people would*  
21 *literally flee, or keep their distance. (Woman participant, Southeast Asia, 50s)*  
22  
23

24 The second most commonly mentioned COVID-19-related harassment or bullying scenario  
25 participants note involves police, authorities, or government officials. As with the “Community”  
26 sources of bullying, these sources relate to specific incidents experienced by participants but  
27 also perceptions from implementation of prevention policies.  
28  
29  
30

31  
32 *En [country] el gobierno prohíbe - el uso de mascarillas en lugares públicos. (In*  
33 *[country], the government prohibited the use of masks in public places.) (Male*  
34 *participant, 50s, Central America)*  
35

36 *The police harassed me when I was coming from the hospital at curfew hours. (40s*  
37 *male, Sub-Saharan Africa)*  
38

39  
40 *The cops scold us if they see us walking on the roads with face masks (South Asia,*  
41 *50s, male)*  
42

43 *I had to go to buy products, but police arrested my car, and sent me home. (Central*  
44 *Asian participant)*  
45

46  
47 *By the government, forbidding something as simple as going to the park while still*  
48 *allowing people to use public transport. (male, 30s, Central Europe)*  
49

50 *Bullied by politicians. Cat go to park with kids and play tennis. Only one person should*  
51 *go shopping. Being under house arrest wile criminals are set free. (North American*  
52 *woman, 50s)*  
53

54  
55 *Mon cousin a été maltraité par la police parce qu'il s'est retrouvé dehors après le*  
56 *couvre-feu. (My cousin was mistreated by the police because he ended up outside*  
57 *after curfew) (Female participant, late teens, Sub-Saharan Africa)*  
58  
59



1  
2  
3 One additional form of community-related COVID-19 harassment and bullying is through  
4  
5 racist or other discriminatory actions, for instance:  
6  
7

8 *Seen a lot of racist graffiti around my city towards Asians. Also heard [racist slur] a few*  
9 *times.* (Male participant from East Asia living in Northern America, in his 30s)  
10

11 *My nephew who is in fifth grade was bullied because of his nationality...* (Female  
12 participant in her 30s, from North America)  
13

14 *My grandparents are Asian and Chinese, all the news stories hurt them because so*  
15 *many racist things are happening to Asians right now...* (Female participant, in her  
16 early 20s, from Northern America)  
17  
18

19 *Soy asiática y al principio (Febrero y antes) la gente me trataba mal por la calle y me*  
20 *evitaba.* (I am Asian and at the beginning (February and before) people treated me  
21 badly on the street and avoided me) (30s female, living in Southwestern Europe, from  
22 Southeastern Asia)  
23  
24

25 *As I belong to a particular religion, the people near my home keep on bullying us for*  
26 *the coronavirus, which is not fair.* (Moslem participant in South Asia, male, 20s)  
27  
28

29 Violence – both verbal and physical – was the third most commonly mentioned COVID-19-  
30 related bullying or harassment scenario, frequently linked to other coded thematic elements  
31 (such as the police, or racism).  
32  
33

34  
35 *I am of part Asian descent and have been bullied, harassed, spit on, blocked from*  
36 *getting goods, and told I am responsible for the "Chinese Virus" even though I am not*  
37 *from China and my Parents and Grandparents and Great Grandparents were all from*  
38 *[Northern America].* (male participant in his 50s, Northern America)  
39  
40

41 *The security agencies have been a pain, even hurting people for not beating the*  
42 *curfew...* (male participant, in his 40s, East Africa)  
43

44 *Chronically ill or folks with cancer being verbally abused by folks for wearing a mask*  
45 *(before the masks for everyone recommendation hit a few days ago)...* (participant in  
46 their 30s, Northern America)  
47

48 *Told in shop to f\*\*\* off out of my space by someone. People are on short fuse and*  
49 *very nasty...* (participant from Northern Europe)  
50  
51

52  
53 People commonly report health care environments and personnel as important contextual  
54 elements of COVID-19-related harassing and bullying situations, for example:  
55  
56  
57  
58  
59

1  
2 *Mi cuñada cometió el error de salir a la calle con ropa quirúrgica (no es ni médico ni*  
3 *enfermera pero trabaja en un hospital...) y la gente la agredió en la calle (sólo*  
4 *insultos, pero si tuvo miedo) (My sister-in-law made the mistake of going out in the*  
5 *street wearing surgical clothes (she is neither a doctor nor a nurse but works in a*  
6 *hospital...) and people attacked her on the street (only insults, but he was afraid)*  
7 *(Central America, female participant, 30s)*  
8  
9

10 *Mi sobrina que es Médica, la hostigan en su domicilio los vecinos diciéndole que se*  
11 *vaya de allí... (My niece, who is a doctor, is harassed at her home by the neighbors*  
12 *telling her to get out of there ...) (South American participant)*  
13

14 *Mi hijo es médico y me lo han ofendido en la calle acusándolo de traer el virus (My*  
15 *son is a doctor and they have insulted me on the street accusing him of bringing the*  
16 *virus) (Male participant, 50s Central America)*  
17  
18

19 *Mis familiares se dedican al sector salud, y sufrieron de hostigamiento por solicitar*  
20 *insumos de trabajo (My relatives are engaged in the health sector, and they suffered*  
21 *harassment for requesting labor supplies) (Male participant, 50s, Central America)*  
22  
23

24 Health care workers commonly note that their personal experiences of COVID-19-related  
25 harassment and bullying involve their professional identities and the visible manifestations of  
26 those identities to the public:  
27  
28  
29

30 *Yes I have had some verbally abuse me on social media including a friend who called*  
31 *me something very unpleasant because I was having a very emotionally difficult*  
32 *weekend (50s, female participant, Northern Europe)*  
33  
34

35 *Unable to enter a supermarket because of being a nurse (Southeast Asia, Male*  
36 *participant, 30s)*  
37

38 *There have been isolated reports from some parts of the country that doctors have*  
39 *been harassed and asked to leave their apartment buildings (30s, Female participant,*  
40 *South Asia)*  
41  
42

43 *I've been ridiculed for trying to enforce physical distancing at my place of work. I've*  
44 *been purposely sneezed on at very close distance. There have been many rude and*  
45 *impatient customers that have been difficult to deal with. (50s, Female participant,*  
46 *Northern America)*  
47  
48

49 *Salir con uniforme médico es complicado, la gente es muy ignorante y nos agrede*  
50 *(Going out with a medical uniform is complicated, people are very ignorant and attack*  
51 *us) (Central America, 40s, Female participant)*  
52

53 *Pacientes exigen que se les atienda en servicios de emergencias en casos no*  
54 *urgentes (Patients demand that they be treated in emergency services in non-urgent*  
55 *cases) (South America participant)*  
56  
57  
58  
59  
60

1  
2 Though less common, some participants report that medical personnel or institutions  
3 perpetrated COVID-19-related harassing or bullying situations:  
4

5  
6 *It was Doctors bullying the public when they should have had the courage to confront*  
7 *the Hospital CEO's and demand masks and PPE equipment be provided. I felt like*  
8 *saying "you stay home so I can go out" besides if the infection control measures were*  
9 *correct then if I wore gloves and keep a TWO or THREE meter physical distance then*  
10 *no Doctor will come to harm. It was unfounded, hysterical, unethical cheap marketing*  
11 *ploy at best and an undeserved guilt trip on the public at worst. I think Doctors and*  
12 *Nurses asked over the top, unreasonable, and unjustifiable restrictions on the public,*  
13 *i.e. to stay at home regardless of the cost. (Male participant, Oceania, 60s)*  
14  
15

## 16 17 18 **DISCUSSION**

19  
20  
21 We have demonstrated that health care workers around the world are statistically significantly  
22 more likely to experience COVID-19-related harassment, bullying, and hurt than others, even  
23 after controlling for a range of confounding factors. Historically, infectious diseases have  
24 faced the most powerful stigma among public health concerns. Furthermore, potentially  
25 deadly conditions, new diseases, and illnesses without a known treatment or cure are other  
26 factors associated with an increased risk of experiencing stigmatization.(8)  
27  
28  
29  
30  
31

32  
33 The lived experience of COVID-19-related bullying among our participants relates frequently  
34 to their public identities as health care workers visible in and traversing through the  
35 community, frequently intersecting with other domains such as police, racism, and violence.  
36 There has been sharp increase in public sentiments of stereotyping and stigmatization of  
37 racial minorities due to COVID-19, especially towards Asian people worldwide.(29, 30) Racist  
38 and xenophobic rhetoric has spread along with the COVID-19 pandemic and is detrimental to  
39 the community's health, creating an atmosphere of fear and lack of safety. Perhaps as a  
40 consequence of this bullying and harassment, health care workers also are significantly more  
41 likely to feel that people with COVID-19 are gossiped about and lose status in the community.  
42 Interestingly, level of education – while higher in health care workers compared with others –  
43 was not associated with COVID-19-related bullying, suggesting that there was little difference  
44 in bullying experience among health workers in different roles. Similarly, while health care  
45 workers had significantly greater access to material assets (e.g., car, home), these assets  
46 were not related to reduced experience of bullying.  
47  
48  
49  
50  
51  
52  
53  
54  
55  
56  
57  
58  
59  
60

1  
2  
3  
4 Health care workers, perhaps unsurprisingly, are substantially immersed in direct COVID-19  
5 experience: they are more likely to test positive for COVID-19 than others, more likely to feel  
6 they have had COVID-19 infection, and more likely to have known family, friends, or  
7 neighbors that became sick with COVID-19 or to know people who have died from it. These  
8 experiences are strongly related to COVID-19-related harassment and bullying and may, in  
9 part, account for the higher prevalence of COVID-19-related stigma beliefs among health  
10 care workers.  
11  
12  
13  
14  
15

16  
17 As we observed, much of the exposure health care workers experience relates to their jobs;  
18 they are less likely to be able to do their jobs from home and are less likely to adhere to  
19 social-physical distancing, both of which place them at excess risk of experiencing COVID-  
20 19-related bullying by placing them in public and often in crowded situations. These situations  
21 are countered, perhaps, in that health care workers are significantly more likely to wear  
22 masks than others and wearing a mask is protective against COVID-19-related harassment  
23 and bullying. Health care workers commonly note that bullying they experience occurs in the  
24 context of public situations (e.g., in stores, and in their housing situations) while en route to  
25 and from their jobs, and through encounters with police that exceed curfews because of work  
26 hours.  
27  
28  
29  
30  
31  
32  
33  
34  
35

36 In an online study of 3,551 non-health care workers in the United States and Canada, high  
37 percentage of Canadians and Americans believed that health care workers should not be  
38 allowed to go out in public, should have restrictions on their freedoms, should be isolated  
39 from community, and should be separated from their families.<sup>(10)</sup> Little has been done  
40 politically to recommend that health care workers be protected for carrying out their  
41 duties.<sup>(10)</sup> The absence of protections – and indeed that bullying often arises from authorities  
42 - creates anxiety for health workers in that they subsequently confront bullying and  
43 stigmatizing situations alone.  
44  
45  
46  
47  
48  
49  
50

51  
52 In part, stigma could be an expected consequence from the pandemic and from the resulting  
53 preventive strategies. Primary prevention of infection aims to reduce exposure to susceptible  
54 individuals as a source of infection. Due to their occupational exposure, health care workers  
55 are often viewed in the community as a potential source of the very infection that the  
56  
57  
58  
59

1  
2 community is trying to prevent.(10, 13) The resulting stigma associated with COVID-19,  
3  
4 however, threatens the physical and mental health of health care workers.(9) A study  
5  
6 including 906 health care workers from 5 major hospitals in Singapore and India reported a  
7  
8 significant association between the prevalence of physical manifestation and psychological  
9  
10 outcomes among health care workers during the COVID-19 outbreak. Results from the study  
11  
12 identify headaches as the most common symptom and highlight a significant association  
13  
14 between depression, anxiety, stress, and PTSD with the presence of physical symptoms.(31)

15  
16 We found that health care workers are significantly more likely to have child and elder care  
17  
18 responsibilities, roles that are statistically significantly associated with greater COVID-19-  
19  
20 related bullying. Health care workers are also more likely to be medically vulnerable  
21  
22 themselves, being significantly more likely to have a chronic health condition and to live with  
23  
24 someone in their household who has a chronic health condition. Social media usage is more  
25  
26 common among health care workers and is generally protective against COVID-19-related  
27  
28 bullying; that said, some participants report social media as the vehicle through which  
29  
30 bullying occurs.

31  
32 We found that about 13% of descriptions of harassing and bullying events were violent, either  
33  
34 verbally or physically, the third most common code applied. Creating violence in workplaces  
35  
36 leads to fear, worry, and suffering of the health care workers' own mental and physical  
37  
38 health.(32) In the early phase of the pandemic, a qualitative study by Liu and colleagues  
39  
40 showed that the health care workers had strong sense of responsibility and teamwork while  
41  
42 facing immense pressure of heavy workloads, lack of protective gear, and feelings of  
43  
44 powerlessness with patients.(33) Over time, however, health worker's physical and  
45  
46 psychological well-being is undermined by the constant pressures of discrimination,  
47  
48 stigmatization, social isolation, and burnout which will be detrimental for controlling the  
49  
50 spread of COVID-19.(34)

51  
52 Prevalence of health care workers, COVID-19-related bullying and harassment, and COVID-  
53  
54 19-related stigma beliefs all varied significantly by region of the world. As a cluster, residents  
55  
56 in Africa, Asia, Northern America, and Oceania were more likely to experience bullying than  
57  
58 their counterparts in Latin America and Europe. Residents of Asia, Africa, and Latin America  
59  
60

1  
2 were also more likely to believe COVID-19 was a stigmatizing condition, resulting in gossip  
3 and lower social status.  
4

5  
6  
7 A study conducted among 3551 adult non-health care workers (1716 from the U.S., and 1835  
8 from Canada) measured indicators of stigmatization, COVID Stress Syndrome, and  
9 avoidance affecting health care workers. Their findings suggest that the tendency to  
10 stigmatize health care workers is associated with the COVID Stress Syndrome that consists  
11 of fear that COVID-19 is highly dangerous, combined with the fear of being exposed to  
12 potentially contaminated surfaces or objects, fear about socio-economic impact of COVID-19,  
13 and fear that foreigners are the source of infection.(35) These factors appear related in our  
14 study as well, with a mix of harassing experiences relating to perceptions of both over- and  
15 under-caution, most commonly illustrated by masking in public places. Further, incidents of  
16 racist harassment relate to perceptions of SARS-CoV-2's origins and fear of people  
17 perceived as "foreign." At least one previous study shows that the severity of the COVID-19  
18 pandemic is associated with the tendency to overestimate health risks in general.(10, 35)  
19 COVID-related stigma around health care workers could be part of a wider tendency to  
20 overestimate health threats and to exaggerate perceptions.(10)  
21  
22  
23  
24  
25  
26  
27  
28  
29  
30  
31  
32

33 The global nature of COVID-19-related harassment and bullying study is further endorsed in  
34 numerous studies. Frontline health workers recovering from COVID-19 in Lagos State,  
35 Nigeria reported feeling stigmatized and psychologically and morally traumatized. When  
36 informed of their positive COVID-19 status the majority of the respondents (who were  
37 knowledgeable on COVID-19), however, reacted with denial, anxiety, distress, disorientation,  
38 crying for fear of stigmatization. Some of the challenges post-diagnosis include loneliness,  
39 worries about the state of their families, nondisclosure of status to family members, isolation  
40 centers with limited space, insomnia and, paradoxically, stigmatization by other health  
41 workers at the isolation center.(3) In Mexico, nurses were denied public transport and  
42 physically assaulted.(13) In India, doctors were asked to vacate from their homes and  
43 attacked while carrying out their duties, believing them to be a source of infection that spread  
44 in housing complexes.(36) Even children of doctors, ambulance drivers, family members of  
45 COVID-19 patients, and discharged patients are shunned by the community. In the  
46 Philippines, a nurse was attacked by men pouring bleach on his face.(37) Many nurses are  
47  
48  
49  
50  
51  
52  
53  
54  
55  
56  
57  
58  
59  
60

1  
2 afraid to wear their uniforms outside of the health care settings, fearing for the safety of their  
3  
4 own lives.(38)  
5  
6

7 Finally, media coverage could introduce fear and anxiety into people's psychological  
8 schemes of the "unknown."(39) Selective reporting by the media about COVID-19 could drive  
9 fear and panic about being infected with the disease, leading to social stigma and  
10 discrimination of vulnerable populations. Health care workers are being shunned because  
11 people fear being infected by them.(40) While media can have a positive effect by portraying  
12 health care workers as "heroes," the negative psychological burden on the health care  
13 workers themselves can be enormous and exhausting.(41) Distrust and panic towards health  
14 care workers potentially carrying COVID-19 further ostracize and oppress the very people  
15 who have the responsibility and training to care for sick COVID-19 patients. Interestingly, in  
16 our study, however, use of *social* media – which was significantly higher among health care  
17 workers – appears protective against bullying; people who used social media daily in our  
18 study were more than 1/3<sup>rd</sup> less likely to experience bullying. The potentially positive impact  
19 of social media use on COVID-19-related experience has been also found in other  
20 studies.(42) This finding reinforces that most bullying and stigma experienced by health care  
21 workers occurs in the context of their daily lives in their communities, workplaces, and  
22 traveling between the two.  
23  
24  
25  
26  
27  
28  
29  
30  
31  
32  
33  
34  
35

### 36 **Strengths and Limitations**

37 Our study is limited by our use of a single question to measure bullying and harassing  
38 experiences, where other studies of similar topics use more nuanced sets of measures. We  
39 also do not collect the participants' roles within the health settings where they work, which  
40 would perhaps distinguish the experiences of different job levels. Our use of social media  
41 also restricts the generalization of our findings, in particular in that countries without access to  
42 Facebook and mTURK (e.g., the People's Republic of China) are not represented. Also, as  
43 an anonymous survey with participants recruited through social media, we rely fully on self-  
44 reported data. People recruited through social media mechanisms may differ from others in  
45 the community with respect to literacy, technological access, and resources. Further, we  
46 have chosen to report UN regional and sub-regional aggregations of countries in our  
47 analyses rather than countries themselves to avoid stigmatization based on our results. Our  
48 study, however, has several strengths, namely a large global sample size, four languages  
49  
50  
51  
52  
53  
54  
55  
56  
57  
58  
59

1  
2 that cover much of the pandemic's reach at the time of data collection, a mixed methods  
3 design, and a robust guiding model of Critical Medical Ecology which helps contextualize  
4 concepts, roles, and levels of impact.  
5  
6  
7

## 8 **Recommendations**

9  
10 In summary, health care workers are placed in closer contact with COVID-19 and the people  
11 infected by it. These workers are often vulnerable themselves (less job flexibility, more family  
12 responsibilities, greater medical risk) and even after controlling for a range of social and  
13 contextual variables, health care workers remain at considerable elevated risk of  
14 experiencing COVID-19-related stigma and bullying. In addition to impacting their own lives,  
15 stigma and bullying against health care workers impacts – even destabilizes – their families,  
16 neighborhoods, and patients. Addressing this issue requires understanding and addressing  
17 why people harass and stigmatize health care workers, and should aim to de-stigmatize  
18 health workers through open dialogue and discussion among stakeholders in their  
19 communities.(43) The United Nations has determined that violence against health care  
20 workers is a human rights violation and any acts of violence against health care workers  
21 discharging their duties should be condemned.(5) In the midst of a pandemic, making work  
22 environments safe and implementing measures to protect health care workers, their patients,  
23 and communities should be visioned as primary and essential prevention of COVID-19 itself,  
24 stress and mental health exacerbation at the individual and community levels, and  
25 interpersonal violence.  
26  
27  
28  
29  
30  
31  
32  
33  
34  
35  
36  
37  
38  
39

40 Studies have shown that during public health emergencies, when immediate and reliable  
41 information is required, there are consistently, subgroups of people that are at greater risk of  
42 experiencing stigmatization, discrimination, and harassment; hence, will need special  
43 attention and protection.(44, 45) Efforts to reduce stigmatization, bullying, and harassment  
44 associated with COVID-19 cannot be isolated; actions should be the result of proactive  
45 collaboration between leaders from diverse sectors of our societies, including but not limited  
46 to governments, health organizations, religious leaders, and public figures, such as athletes,  
47 communicators, and social influencers.  
48  
49  
50  
51  
52  
53  
54

55 Strategies for reducing health care worker risk of COVID-19-related bullying should include  
56 promotion of reliable and official sources of information, such as social media and other  
57  
58  
59



1  
2 communication methods since misinformation can increase the levels of stress. Moreover,  
3 the message must be clear and oriented to increasing awareness while not promoting fear.  
4 Communities should be supported to identify and mitigate negative behaviors in order to  
5 support stigmatized groups. Lastly, groups at risk of experiencing stigmatization and bullying,  
6 such as health care workers, should first count on support and effective measures of  
7 protection in and out of their workplaces and communities.(43) Furthermore, health care  
8 workers at risk of or who have experienced any type of offence must be provided with  
9 psychological support to overcome the different forms of aggression.  
10  
11  
12  
13  
14  
15  
16  
17  
18  
19  
20  
21  
22  
23  
24

## 25 **ACKNOWLEDGEMENTS**

26  
27 We are grateful for the assistance of Connor DeAndrea-Lazarus, Kathleen Buckwell, Cody  
28 Gardner, and Carrie Dykes for logistical assistance with developing, reviewing, and  
29 implementing aspects of this project. We also acknowledge the contributions of Wyatte Hall,  
30 Carrie Irvine, Dongmei Li, Erin Muir, José G. Pérez Ramos, Sophia Wiltse, and Rebecca  
31 Royzer to the parent project of which this effort was a part.  
32  
33  
34

## 35 **Author Statement**

36  
37 TD directed the design, implementation, and analysis of this study, and led the development  
38 of this manuscript. LA conducted background research and contributed to writing this  
39 manuscript. SS contributed to this study's design, conducted background research, and  
40 contributed to writing this manuscript. MB and SS contributed to this study's design, reviewed  
41 and coded qualitative data, and reviewed and edited drafts. TP reviewed and edited drafts  
42 and participated in the design of the study. EP contributed to the design of this study and  
43 reviewed the final manuscript. All co-authors reviewed and approved the final manuscript.  
44  
45  
46

## 47 **Conflict of Interest Statement**

48  
49 The authors report no financial or other conflicts of interest with the content of this study.  
50 During the period of this study, Dr. Dye was the Principal Investigator on unrelated grants and  
51 contracts from the US National Institutes of Health, Pfizer Global Medical Grants, and the  
52 New York State AIDS Institute.  
53  
54

## 55 **Data Statement**

1  
2 Given the identifying and potentially stigmatizing nature of the data in this study, analyses are  
3 provided in this paper to support its conclusions though datasets are not publicly available.  
4 Interested investigators can request data from the Corresponding Author.  
5

## 6 REFERENCES

- 7
- 8
- 9 1. Link B, Hatzenbuehler ML. Stigma as an unrecognized determinant of population health:  
10 Research and policy implications. *Journal of Health Politics, Policy and Law*. 2016;41(4):653-73.
- 11 2. Link BG, Phelan JC. Conceptualizing stigma. *Annual review of Sociology*. 2001;27(1):363-85.
- 12 3. Kwaghe AV, Ilesanmi OS, Amede PO, Okediran JO, Utulu R, Balogun MS. Stigmatization,  
13 psychological and emotional trauma among frontline health care workers treated for COVID-19 in  
14 Lagos State, Nigeria: A qualitative study. 2020.
- 15 4. Sauer KS, Jungmann SM, Witthöft M. Emotional and behavioral consequences of the COVID-  
16 19 pandemic: The role of health anxiety, intolerance of uncertainty, and distress (in) tolerance.  
17 *International journal of environmental research and public health*. 2020;17(19):7241.
- 18 5. Council US. Resolution 2286 (2016). United Nations Security Council. 2016.
- 19 6. Safeguarding Health in Conflict Coalition. Health Workers at Risk: Violence Against Health  
20 Care. Accessed at [www.safeguardinghealth.org](http://www.safeguardinghealth.org), October 22, 2020. .
- 21 7. Devi S. COVID-19 exacerbates violence against health workers. *The Lancet*.  
22 2020;396(10252):658.
- 23 8. Brewis A, Wutich A, Mahdavi P. Stigma, pandemics, and human biology: Looking back, looking  
24 forward. *American Journal of Human Biology*. 2020.
- 25 9. Bagcchi S. Stigma during the COVID-19 pandemic. *The Lancet Infectious Diseases*.  
26 2020;20(7):782.
- 27 10. Taylor S, Landry CA, Rachor GS, Paluszek MM, Asmundson GJ. Fear and avoidance of  
28 healthcare workers: An important, under-recognized form of stigmatization during the COVID-19  
29 pandemic. *Journal of Anxiety Disorders*. 2020;75:102289.
- 30 11. Ransing R, Ramalho R, de Filippis R, Ojeahere MI, Karaliuniene R, Orsolini L, et al. Infectious  
31 Disease Outbreak Related Stigma and Discrimination during the COVID-19 Pandemic: Drivers,  
32 Facilitators, Manifestations, and Outcomes across the World. *Brain, Behavior, and Immunity*. 2020.
- 33 12. McKay D, Heisler M, Mishori R, Catton H, Kloiber O. Attacks against health-care personnel  
34 must stop, especially as the world fights COVID-19. *The Lancet*. 2020;395(10239):1743-5.
- 35 13. Diaz M. Coronavirus: Health workers face violent attacks in Mexico. *BBC News*.  
36 <https://www.bbc.com/news/world-latin-america-52676939>. Published May 17, 2020. Accessed  
37 October 20, 2020.
- 38 14. Dye T, Levandowski B, Li D, Wiltse S, Muir E, Ramos JP, et al. Multilevel Analysis of Personal,  
39 Non-Medical COVID-19-Related Impact Worldwide. *Annals of Epidemiology*. 2020.
- 40 15. De Ver Dye T, Muir E, Farovitch L, Siddiqi S, Sharma S. Critical medical ecology and SARS-COV-2  
41 in the urban environment: a pragmatic, dynamic approach to explaining and planning for research  
42 and practice. *Infectious Diseases of Poverty*. 2020;9(1):1-7.
- 43 16. Elm E, Altman DG, Egger M, Pocock SJ, Gøtzsche PC, Vandenbroucke JP. The Strengthening the  
44 Reporting of Observational Studies in Epidemiology (STROBE) statement: guidelines for reporting  
45 observational studies. *J Clin Epidemiol*. 2008;61.
- 46 17. Tong A, Sainsbury P, Craig J. Consolidated criteria for reporting qualitative research (COREQ): a  
47 32-item checklist for interviews and focus groups. *International Journal for Quality in Health Care*.  
48 2007;19(6):349-57.
- 49
- 50
- 51
- 52
- 53
- 54
- 55
- 56
- 57
- 58
- 59

18. Dong E, Du H, Gardner L. An interactive web-based dashboard to track COVID-19 in real time. *The Lancet infectious diseases*. 2020;20(5):533-4.
19. United Nations Statistics Division. Methodology—standard country or area codes for statistical use (M49). 2019 [
20. International Organization for Standardization. ISO Country Codes Collection: Online Browsing Platform 2020 [Available from: <https://www.iso.org/obp/ui/-search>.
21. Difallah D, Filatova E, Ipeirotis P, editors. Demographics and dynamics of mechanical Turk workers. *Proceedings of the Eleventh ACM International Conference on Web Search and Data Mining*; 2018.
22. Shaver LG, Khawer A, Yi Y, Aubrey-Bassler K, Etchegary H, Roebathan B, et al. Using Facebook advertising to recruit representative samples: Feasibility assessment of a cross-sectional survey. *Journal of Medical Internet Research*. 2019;21(8):e14021.
23. Sheehan KB, Pittman M. Amazon's Mechanical Turk for academics: The HIT handbook for social science research: Melvin & Leigh, Publishers; 2016.
24. Moss AJ, Rosenzweig C, Robinson J, Litman L. Is it Ethical to Use Mechanical Turk for Behavioral Research? Relevant Data from a Representative Survey of MTurk Participants and Wages. 2020.
25. Dye T, Levandowski B, Siddiqi S, Pérez Ramos J, Li D, Sharma S, et al. Non-medical COVID-19-related personal impact in medical ecological perspective: A global multileveled, mixed method study. *PLOS ONE* 2020 (submitted). 2020.
26. Hamel L, Lopez L, Muñana C, Kates J, Michaud J, Brodie M. KFF Health Tracking Poll March 2020: <https://www.kff.org/coronavirus-covid-19/poll-finding/kff-coronavirus-poll-march-2020/>; 2020 [
27. Stangl A, Brady I, Fritz K. Technical Brief: Measuring HIV stigma and discrimination; International center for research on Women, Washington D.C., USA; 2012 (updated in 2018). 2018.
28. Hosmer Jr DW, Lemeshow S. *Applied logistic regression*: John Wiley & Sons; 2004.
29. Roberto KJ, Johnson AF, Rauhaus BM. Stigmatization and prejudice during the COVID-19 pandemic. *Administrative Theory & Praxis*. 2020;42(3):364-78.
30. Kandil C. Asian Americans report over 650 racist acts over last week, new data says. *NBC News*. 2020;26.
31. Chew NW, Lee GK, Tan BY, Jing M, Goh Y, Ngiam NJ, et al. A multinational, multicentre study on the psychological outcomes and associated physical symptoms amongst healthcare workers during COVID-19 outbreak. *Brain, behavior, and immunity*. 2020.
32. Sasaki N, Kuroda R, Tsuno K, Kawakami N. Fear, worry and workplace harassment related to the COVID-19 epidemic among employees in Japan: prevalence and impact on mental and physical health. Available at SSRN 3569887. 2020.
33. Liu Q, Luo D, Haase JE, Guo Q, Wang XQ, Liu S, et al. The experiences of health-care providers during the COVID-19 crisis in China: a qualitative study. *The Lancet Global Health*. 2020.
34. Xiong Y, Peng L. Focusing on health-care providers' experiences in the COVID-19 crisis. *The Lancet Global Health*. 2020;8(6):e740-e1.
35. Taylor S, Landry C, Paluszek M, Fergus TA, McKay D, Asmundson GJ. Development and initial validation of the COVID Stress Scales. *Journal of Anxiety Disorders*. 2020:102232.
36. Withnall A. Coronavirus: why India has had to pass new law against attacks on healthcare workers. *The Independent*. April 23, 2020. Accessed October 20, 2020. <https://www.independent.co.uk/news/world/asia/coronavirus-india-doctor-nurse-attack-law-modi-health-care-workers-a9480801.html>.

- 1  
2 37. The Economist. Health workers become unexpected targets during COVID-19. The  
3 Economist. May 11, 2020. [https://www.economist.com/international/2020/05/11/health-workers-  
4 become-unexpected-targets-during-covid-19](https://www.economist.com/international/2020/05/11/health-workers-become-unexpected-targets-during-covid-19).  
5  
6 38. Semple K. 'Afraid to Be a Nurse': Health Workers Under Attack. The New York Times.  
7 Published April 27, 2020. Accessed October 20, 2020.  
8 <https://www.nytimes.com/2020/04/27/world/americas/coronavirus-health-workers-attacked.html>.  
9  
10 39. Chaiuk TA, Dunaievska OV. Fear Culture in Media: An Examination on Coronavirus Discourse.  
11 Journal of History Culture and Art Research. 2020;9(2):184-94.  
12 40. Ramaci T, Barattucci M, Ledda C, Rapisarda V. Social Stigma during COVID-19 and its impact on  
13 HCWs outcomes. Sustainability. 2020;12(9):3834.  
14 41. Cox CL. 'Healthcare Heroes': problems with media focus on heroism from healthcare workers  
15 during the COVID-19 pandemic. Journal of Medical Ethics. 2020;46(8):510-3.  
16 42. Al-Dmour H, Masa'deh P, Salman P, Abuhashesh D, Al-Dmour D. The Influence of Social Media  
17 Platforms on Public Health Protection against Coronavirus (COVID-19) Pandemic Disease via the  
18 Mediating Effects of Public Health Awareness and Behavioral Change: An Integrated Model. Journal  
19 of Medical Internet Research. 2020.  
20 43. Baldassarre A, Giorgi G, Alessio F, Lulli LG, Arcangeli G, Mucci N. Stigma and Discrimination  
21 (SAD) at the Time of the SARS-CoV-2 Pandemic. International Journal of Environmental Research and  
22 Public Health. 2020;17(17):6341.  
23 44. Abdelhafiz AS, Alorabi M. Social Stigma: The Hidden Threat of COVID-19. Frontiers in public  
24 health. 2020;8.  
25 45. World Health Organization. Mental health and psychosocial considerations during the COVID-  
26 19 outbreak, 18 March 2020. World Health Organization; 2020.  
27  
28  
29  
30  
31  
32  
33  
34  
35  
36  
37  
38  
39  
40  
41  
42  
43  
44  
45  
46  
47  
48  
49  
50  
51  
52  
53  
54  
55  
56  
57  
58  
59  
60

| <b>Table 1. Association of Demographic, Residential, Household, and COVID-19-related Variables with Working in Health Care Setting and COVID-19-related Harassment and Bullying</b>              |                                                                                                                                       |                                                                 |                 |                                                                                            |                                                        |                 |
|--------------------------------------------------------------------------------------------------------------------------------------------------------------------------------------------------|---------------------------------------------------------------------------------------------------------------------------------------|-----------------------------------------------------------------|-----------------|--------------------------------------------------------------------------------------------|--------------------------------------------------------|-----------------|
|                                                                                                                                                                                                  | <b>Do you work in a health care delivery setting, such as a doctor's office, clinic, hospital, nursing home, or dentist's office?</b> |                                                                 |                 | <b>Have you or a family member been harassed, bullied, or hurt because of coronavirus?</b> |                                                        |                 |
|                                                                                                                                                                                                  | <b>Yes (checked), I do work in a health care setting</b>                                                                              | <b>No (not checked), I do not work in a health care setting</b> | <b>p-value*</b> | <b>Yes, I or someone have/ has been bullied</b>                                            | <b>No, I or someone have not/ has not been bullied</b> | <b>p-value*</b> |
|                                                                                                                                                                                                  | <b>(n=837)</b>                                                                                                                        | <b>(n=6574)</b>                                                 |                 | <b>(n=595)</b>                                                                             | <b>(n=6456)</b>                                        |                 |
| <b>Among those tested: what was the result of the test for coronavirus?</b>                                                                                                                      |                                                                                                                                       |                                                                 |                 |                                                                                            |                                                        |                 |
| Tested COVID-19 positive                                                                                                                                                                         | 62 (52.5)                                                                                                                             | 56 (47.5)                                                       | <.001           | 61 (51.7)                                                                                  | 57 (48.3)                                              | <.001           |
| Tested COVID-19 negative                                                                                                                                                                         | 99 (33.2)                                                                                                                             | 199 (66.8)                                                      |                 | 54 (18.1)                                                                                  | 244 (81.9)                                             |                 |
|                                                                                                                                                                                                  |                                                                                                                                       |                                                                 |                 |                                                                                            |                                                        |                 |
| <b>Do you feel you now have - or have you recently had - coronavirus infection?</b>                                                                                                              |                                                                                                                                       |                                                                 |                 |                                                                                            |                                                        |                 |
| Believe have/ have had COVID-19                                                                                                                                                                  | 151 (24.6)                                                                                                                            | 463 (75.4)                                                      | <.001           | 167 (27.2)                                                                                 | 446 (72.8)                                             | <.001           |
| Do not believe have/ have had COVID-19/DK if had COVID-19                                                                                                                                        | 678(10.8)                                                                                                                             | 5597 (89.2)                                                     |                 | 406 (6.5)                                                                                  | 5856 (93.5)                                            |                 |
|                                                                                                                                                                                                  |                                                                                                                                       |                                                                 |                 |                                                                                            |                                                        |                 |
| <b>How closely are you following social or physical distancing, that is, staying at home, away from other people whenever you can, or staying away from other people when in a public place?</b> |                                                                                                                                       |                                                                 |                 |                                                                                            |                                                        |                 |
| Followed social distancing closely                                                                                                                                                               | 716 (11.7)                                                                                                                            | 5428 (88.3)                                                     | 0.003           | 475 (7.7)                                                                                  | 5655 (92.3)                                            | <.001           |
| Not followed social distancing closely                                                                                                                                                           | 118 (15.4)                                                                                                                            | 647 (84.6)                                                      |                 | 101 (13.3)                                                                                 | 660 (86.7)                                             |                 |
|                                                                                                                                                                                                  |                                                                                                                                       |                                                                 |                 |                                                                                            |                                                        |                 |

**Table 1. Association of Demographic, Residential, Household, and COVID-19-related Variables with Working in Health Care Setting and COVID-19-related Harassment and Bullying**

|                                                                                                                                                                     | Do you work in a health care delivery setting, such as a doctor's office, clinic, hospital, nursing home, or dentist's office? |                                                          |          | Have you or a family member been harassed, bullied, or hurt because of coronavirus? |                                                |          |
|---------------------------------------------------------------------------------------------------------------------------------------------------------------------|--------------------------------------------------------------------------------------------------------------------------------|----------------------------------------------------------|----------|-------------------------------------------------------------------------------------|------------------------------------------------|----------|
|                                                                                                                                                                     | Yes (checked), I do work in a health care setting                                                                              | No (not checked), I do not work in a health care setting | p-value* | Yes, I or someone have/has been bullied                                             | No, I or someone have not/has not been bullied | p-value* |
|                                                                                                                                                                     | (n=837)                                                                                                                        | (n=6574)                                                 |          | (n=595)                                                                             | (n=6456)                                       |          |
| <b>Bought or worn a protective mask (since the coronavirus outbreak)</b>                                                                                            |                                                                                                                                |                                                          |          |                                                                                     |                                                |          |
| Did not buy or wear mask                                                                                                                                            | 146 (9.8)                                                                                                                      | 1350 (90.2)                                              | 0.011    | 164 (11.1)                                                                          | 1309 (88.9)                                    | <.001    |
| Bought or wore mask                                                                                                                                                 | 682 (12.1)                                                                                                                     | 4943 (87.9)                                              |          | 428 (7.7)                                                                           | 5108 (92.3)                                    |          |
| <b>Do you personally know someone who has died from coronavirus infection (or COVID-19)?</b>                                                                        |                                                                                                                                |                                                          |          |                                                                                     |                                                |          |
| Did not have family, friend, or neighbor die from COVID-19                                                                                                          | 626 (9.4)                                                                                                                      | 6068 (90.6)                                              | <.001    | 431 (6.8)                                                                           | 5905 (93.2)                                    | <.001    |
| Had family, friend, or neighbor die from COVID-19                                                                                                                   | 211 (29.4)                                                                                                                     | 506 (70.6)                                               |          | 164 (22.9)                                                                          | 551 (77.1)                                     |          |
| <b>Do you personally know someone who has coronavirus infection (or COVID-19)?</b>                                                                                  |                                                                                                                                |                                                          |          |                                                                                     |                                                |          |
| Do not have family, friend, or neighbor with COVID-19                                                                                                               | 505 (8.7)                                                                                                                      | 5315 (91.3)                                              | <.001    | 356 (6.5)                                                                           | 5106 (93.5)                                    | <.001    |
| Have family, friend, or neighbor with COVID-19                                                                                                                      | 332 (20.9)                                                                                                                     | 1259 (79.1)                                              |          | 239 (15.0)                                                                          | 1350 (85.0)                                    |          |
| <b>If you were required to remain at home because of quarantine or school or work closure, would you be able to do at least part of your job from home, or not?</b> |                                                                                                                                |                                                          |          |                                                                                     |                                                |          |

**Table 1. Association of Demographic, Residential, Household, and COVID-19-related Variables with Working in Health Care Setting and COVID-19-related Harassment and Bullying**

|                                                           | Do you work in a health care delivery setting, such as a doctor's office, clinic, hospital, nursing home, or dentist's office? |                                                          |          | Have you or a family member been harassed, bullied, or hurt because of coronavirus? |                                                |          |
|-----------------------------------------------------------|--------------------------------------------------------------------------------------------------------------------------------|----------------------------------------------------------|----------|-------------------------------------------------------------------------------------|------------------------------------------------|----------|
|                                                           | Yes (checked), I do work in a health care setting                                                                              | No (not checked), I do not work in a health care setting | p-value* | Yes, I or someone have/has been bullied                                             | No, I or someone have not/has not been bullied | p-value* |
|                                                           | (n=837)                                                                                                                        | (n=6574)                                                 |          | (n=595)                                                                             | (n=6456)                                       |          |
| Could work from home/DK/NA                                | 516 (9.9)                                                                                                                      | 4678 (90.1)                                              | <.001    | 367 (7.1)                                                                           | 4815 (92.9)                                    | <.001    |
| Could not work from home                                  | 302 (21.0)                                                                                                                     | 1138 (79.0)                                              |          | 179 (12.4)                                                                          | 1259 (87.6)                                    |          |
| <b>What best describes your education?</b>                |                                                                                                                                |                                                          |          |                                                                                     |                                                |          |
| High school or less education                             | 69 (7.2)                                                                                                                       | 884 (92.8)                                               | <.001    | 77 (8.1)                                                                            | 873 (91.9)                                     | 0.729    |
| More than high school education                           | 638 (12.8)                                                                                                                     | 4362 (87.2)                                              |          | 387 (7.8)                                                                           | 4590 (92.2)                                    |          |
| <b>What is your current age, in years?</b>                |                                                                                                                                |                                                          |          |                                                                                     |                                                |          |
| Age under 32 years                                        | 247 (12.2)                                                                                                                     | 1770 (87.8)                                              | 0.7      | 165 (8.2)                                                                           | 1842 (91.8)                                    | 0.721    |
| Age 32 years or more                                      | 493 (11.9)                                                                                                                     | 3648 (88.1)                                              |          | 328 (8.0)                                                                           | 3794 (92.0)                                    |          |
| <b>Which of the following best describes your gender:</b> |                                                                                                                                |                                                          |          |                                                                                     |                                                |          |
| Male                                                      | 366 (11.3)                                                                                                                     | 2861 (88.7)                                              | 0.161    | 294 (9.2)                                                                           | 2918 (90.8)                                    | <.001    |

**Table 1. Association of Demographic, Residential, Household, and COVID-19-related Variables with Working in Health Care Setting and COVID-19-related Harassment and Bullying**

|                                    | Do you work in a health care delivery setting, such as a doctor's office, clinic, hospital, nursing home, or dentist's office? |                                                          |          | Have you or a family member been harassed, bullied, or hurt because of coronavirus? |                                                |          |
|------------------------------------|--------------------------------------------------------------------------------------------------------------------------------|----------------------------------------------------------|----------|-------------------------------------------------------------------------------------|------------------------------------------------|----------|
|                                    | Yes (checked), I do work in a health care setting                                                                              | No (not checked), I do not work in a health care setting | p-value* | Yes, I or someone have/has been bullied                                             | No, I or someone have not/has not been bullied | p-value* |
|                                    | (n=837)                                                                                                                        | (n=6574)                                                 |          | (n=595)                                                                             | (n=6456)                                       |          |
| Female                             | 363 (12.8)                                                                                                                     | 2465 (87.2)                                              |          | 188 (6.7)                                                                           | 2629 (93.3)                                    |          |
| Other option                       | 3 (8.3)                                                                                                                        | 33 (91.7)                                                |          | 12 (33.3)                                                                           | 24 (66.7)                                      |          |
|                                    |                                                                                                                                |                                                          |          |                                                                                     |                                                |          |
| <b>Use social media daily</b>      |                                                                                                                                |                                                          |          |                                                                                     |                                                |          |
| Does not use social media daily    | 156 (9.5)                                                                                                                      | 1494 (90.5)                                              | 0.007    | 158 (12.1)                                                                          | 1146 (87.9)                                    | <.001    |
| Uses social media daily            | 681 (11.8)                                                                                                                     | 5080 (88.2)                                              |          | 437 (7.6)                                                                           | 5310 (92.4)                                    |          |
|                                    |                                                                                                                                |                                                          |          |                                                                                     |                                                |          |
| <b>UN Region of Residence</b>      |                                                                                                                                |                                                          |          |                                                                                     |                                                |          |
| Africa region                      | 79 (13.6)                                                                                                                      | 504 (86.4)                                               | <.001    | 59 (11.5)                                                                           | 455 (88.5)                                     | <.001    |
| Northern Africa                    | 14 (9.7)                                                                                                                       | 130 (90.3)                                               |          | 4 (0.03.3)                                                                          | 116 (96.7)                                     |          |
| Sub-Saharan Africa                 | 65 (14.8)                                                                                                                      | 374 (85.2)                                               |          | 55 (0.14.0)                                                                         | 339 (86.0)                                     |          |
| Sub-Saharan Africa: Eastern Africa | 37 (16.7)                                                                                                                      | 184 (83.3)                                               |          | 32 (0.16.1)                                                                         | 167 (83.9)                                     |          |
| Sub-Saharan Africa: Middle Africa  | 4 (10.8)                                                                                                                       | 33 (89.2)                                                |          | 4 (0.12.1)                                                                          | 29 (87.9)                                      |          |



**Table 1. Association of Demographic, Residential, Household, and COVID-19-related Variables with Working in Health Care Setting and COVID-19-related Harassment and Bullying**

|                                     | Do you work in a health care delivery setting, such as a doctor's office, clinic, hospital, nursing home, or dentist's office? |                                                          |          | Have you or a family member been harassed, bullied, or hurt because of coronavirus? |                                                |          |
|-------------------------------------|--------------------------------------------------------------------------------------------------------------------------------|----------------------------------------------------------|----------|-------------------------------------------------------------------------------------|------------------------------------------------|----------|
|                                     | Yes (checked), I do work in a health care setting                                                                              | No (not checked), I do not work in a health care setting | p-value* | Yes, I or someone have/has been bullied                                             | No, I or someone have not/has not been bullied | p-value* |
|                                     | (n=837)                                                                                                                        | (n=6574)                                                 |          | (n=595)                                                                             | (n=6456)                                       |          |
| Sub-Saharan Africa: Southern Africa | 8 (11.8)                                                                                                                       | 60 (88.2)                                                |          | 11 (0.17.5)                                                                         | 52 (82.5)                                      |          |
| Sub-Saharan Africa: Western Africa  | 16 (14.2)                                                                                                                      | 97 (85.8)                                                |          | 8 (0.08.1)                                                                          | 91 (91.9)                                      |          |
|                                     |                                                                                                                                |                                                          |          |                                                                                     |                                                |          |
| Asia Region                         | 237 (16.2)                                                                                                                     | 1227 (83.8)                                              |          | 141 (0.10.3)                                                                        | 1234 (89.7)                                    |          |
| Central Asia                        | 1 (25.0)                                                                                                                       | 3 (75.0)                                                 |          | 2 (0.50.0)                                                                          | 2 (50.0)                                       |          |
| Eastern Asia                        | 1 (3.8)                                                                                                                        | 25 (96.2)                                                |          | 1 (0.04.0)                                                                          | 24 (96.0)                                      |          |
| South-eastern Asia                  | 22 (9.6)                                                                                                                       | 207 (90.4)                                               |          | 13 (0.06.1)                                                                         | 201 (93.9)                                     |          |
| Southern Asia                       | 189 (17.0)                                                                                                                     | 924 (83.0)                                               |          | 112 (0.10.7)                                                                        | 932 (89.3)                                     |          |
| Western Asia                        | 24 (26.1)                                                                                                                      | 68 (73.9)                                                |          | 13 (0.14.8)                                                                         | 75 (85.2)                                      |          |
|                                     |                                                                                                                                |                                                          |          |                                                                                     |                                                |          |
| Europe Region                       | 96 (6.2)                                                                                                                       | 1448 (93.8)                                              |          | 76 (5.0)                                                                            | 1433 (95.0)                                    |          |
| Eastern Europe                      | 8 (8.7)                                                                                                                        | 84 (91.3)                                                |          | 8 (9.0)                                                                             | 81 (91.0)                                      |          |
| Northern Europe                     | 42 (8.3)                                                                                                                       | 464 (91.7)                                               |          | 34 (6.9)                                                                            | 462 (93.1)                                     |          |

**Table 1. Association of Demographic, Residential, Household, and COVID-19-related Variables with Working in Health Care Setting and COVID-19-related Harassment and Bullying**

|                                        | Do you work in a health care delivery setting, such as a doctor's office, clinic, hospital, nursing home, or dentist's office? |                                                          |          | Have you or a family member been harassed, bullied, or hurt because of coronavirus? |                                                |          |
|----------------------------------------|--------------------------------------------------------------------------------------------------------------------------------|----------------------------------------------------------|----------|-------------------------------------------------------------------------------------|------------------------------------------------|----------|
|                                        | Yes (checked), I do work in a health care setting                                                                              | No (not checked), I do not work in a health care setting | p-value* | Yes, I or someone have/has been bullied                                             | No, I or someone have not/has not been bullied | p-value* |
|                                        | (n=837)                                                                                                                        | (n=6574)                                                 |          | (n=595)                                                                             | (n=6456)                                       |          |
| Southern Europe                        | 35 (4.9)                                                                                                                       | 678 (95.1)                                               |          | 22 (3.2)                                                                            | 674 (96.8)                                     |          |
| Western Europe                         | 11 (4.7)                                                                                                                       | 222 (95.3)                                               |          | 12 (5.3)                                                                            | 216 (94.7)                                     |          |
|                                        |                                                                                                                                |                                                          |          |                                                                                     |                                                |          |
| Latin America and the Caribbean Region | 187 (11.4)                                                                                                                     | 1458 (88.6)                                              |          | 99 (6.4)                                                                            | 1459 (93.6)                                    |          |
| Caribbean                              | 57 (14.7)                                                                                                                      | 330 (85.3)                                               |          | 22 (6.0)                                                                            | 342 (94.0)                                     |          |
| Central America                        | 75 (11.3)                                                                                                                      | 589 (88.7)                                               |          | 49 (7.8)                                                                            | 580 (92.2)                                     |          |
| South America                          | 55 (9.3)                                                                                                                       | 539 (90.7)                                               |          | 28 (5.0)                                                                            | 537 (95.0)                                     |          |
|                                        |                                                                                                                                |                                                          |          |                                                                                     |                                                |          |
| Northern America Region                | 205 (12.1)                                                                                                                     | 1490 (87.9)                                              |          | 172 (10.6)                                                                          | 1455 (89.4)                                    |          |
|                                        |                                                                                                                                |                                                          |          |                                                                                     |                                                |          |
| Oceania Region                         | 33 (6.9)                                                                                                                       | 447 (93.1)                                               |          | 48 (10.3)                                                                           | 420 (89.7)                                     |          |
| Australia and New Zealand              | 28 (6.5)                                                                                                                       | 402 (93.5)                                               |          | 41 (9.6)                                                                            | 385 (90.4)                                     |          |
| Melanesia                              | 0 (0)                                                                                                                          | 21 (100.0)                                               |          | 2 (13.3)                                                                            | 13 (86.7)                                      |          |

**Table 1. Association of Demographic, Residential, Household, and COVID-19-related Variables with Working in Health Care Setting and COVID-19-related Harassment and Bullying**

|                                                                                                                                                                | Do you work in a health care delivery setting, such as a doctor's office, clinic, hospital, nursing home, or dentist's office? |                                                          |          | Have you or a family member been harassed, bullied, or hurt because of coronavirus? |                                                |          |
|----------------------------------------------------------------------------------------------------------------------------------------------------------------|--------------------------------------------------------------------------------------------------------------------------------|----------------------------------------------------------|----------|-------------------------------------------------------------------------------------|------------------------------------------------|----------|
|                                                                                                                                                                | Yes (checked), I do work in a health care setting                                                                              | No (not checked), I do not work in a health care setting | p-value* | Yes, I or someone have/has been bullied                                             | No, I or someone have not/has not been bullied | p-value* |
|                                                                                                                                                                | (n=837)                                                                                                                        | (n=6574)                                                 |          | (n=595)                                                                             | (n=6456)                                       |          |
| Micronesia                                                                                                                                                     | 0 (0)                                                                                                                          | 17 (100.0)                                               |          | 0 (0)                                                                               | 17 (100.0)                                     |          |
| Polynesia                                                                                                                                                      | 5 (41.7)                                                                                                                       | 7 (58.3)                                                 |          | 5 (50.0)                                                                            | 5 (50.0)                                       |          |
|                                                                                                                                                                |                                                                                                                                |                                                          |          |                                                                                     |                                                |          |
| <b>Do you or does someone in your household have a serious health condition such as high blood pressure, heart disease, lung disease, cancer, or diabetes?</b> |                                                                                                                                |                                                          |          |                                                                                     |                                                |          |
| I do not have a chronic disease                                                                                                                                | 569 (9.6)                                                                                                                      | 5335 (90.4)                                              | <.001    | 402 (7.2)                                                                           | 5146 (92.8)                                    | <.001    |
| I have a chronic disease                                                                                                                                       | 268 (17.8)                                                                                                                     | 1239 (82.2)                                              |          | 193 (12.8)                                                                          | 1310 (87.2)                                    |          |
|                                                                                                                                                                |                                                                                                                                |                                                          |          |                                                                                     |                                                |          |
| No one in my household has a chronic disease                                                                                                                   | 553 (10.1)                                                                                                                     | 4927 (89.9)                                              | <.001    | 421 (8.2)                                                                           | 4703 (91.8)                                    | 0.274    |
| Someone else in my household has a chronic disease                                                                                                             | 284 (14.7)                                                                                                                     | 1647 (85.3)                                              |          | 174 (9.0)                                                                           | 1753 (91.0)                                    |          |
|                                                                                                                                                                |                                                                                                                                |                                                          |          |                                                                                     |                                                |          |
| <b>Are you responsible for taking care of children?</b>                                                                                                        |                                                                                                                                |                                                          |          |                                                                                     |                                                |          |
| I am not responsible for care of children                                                                                                                      | 388 (9.7)                                                                                                                      | 3622 (90.3)                                              | <.001    | 254 (6.3)                                                                           | 3748 (93.7)                                    | <.001    |
| I am responsible for care of children                                                                                                                          | 432 (16.4)                                                                                                                     | 2205 (83.6)                                              |          | 295 (11.2)                                                                          | 2334 (88.8)                                    |          |

**Table 1. Association of Demographic, Residential, Household, and COVID-19-related Variables with Working in Health Care Setting and COVID-19-related Harassment and Bullying**

|                                                                                                                                                            | Do you work in a health care delivery setting, such as a doctor's office, clinic, hospital, nursing home, or dentist's office? |                                                          |          | Have you or a family member been harassed, bullied, or hurt because of coronavirus? |                                                |          |
|------------------------------------------------------------------------------------------------------------------------------------------------------------|--------------------------------------------------------------------------------------------------------------------------------|----------------------------------------------------------|----------|-------------------------------------------------------------------------------------|------------------------------------------------|----------|
|                                                                                                                                                            | Yes (checked), I do work in a health care setting                                                                              | No (not checked), I do not work in a health care setting | p-value* | Yes, I or someone have/has been bullied                                             | No, I or someone have not/has not been bullied | p-value* |
|                                                                                                                                                            | (n=837)                                                                                                                        | (n=6574)                                                 |          | (n=595)                                                                             | (n=6456)                                       |          |
| <b>Are you responsible for taking care of any elderly people?</b>                                                                                          |                                                                                                                                |                                                          |          |                                                                                     |                                                |          |
| I am not responsible for care of elders                                                                                                                    | 378 (8.6)                                                                                                                      | 4039 (91.4)                                              | <.001    | 254 (6.3)                                                                           | 3748 (93.7)                                    | <.001    |
| I am responsible for care of elders                                                                                                                        | 450 (19.5)                                                                                                                     | 1855 (80.5)                                              |          | 289 (12.6)                                                                          | 2009 (87.4)                                    |          |
|                                                                                                                                                            |                                                                                                                                |                                                          |          |                                                                                     |                                                |          |
| <b>Do anyone in your household work in a health care delivery setting, such as a doctor's office, clinic, hospital, nursing home, or dentist's office?</b> |                                                                                                                                |                                                          |          |                                                                                     |                                                |          |
| No one else in my household works in a health care setting                                                                                                 | 754 (11.5)                                                                                                                     | 5806 (88.5)                                              | 0.131    | 474 (7.6)                                                                           | 5730 (92.4)                                    | <.001    |
| Someone else in my household works in a health care setting                                                                                                | 83 (9.8)                                                                                                                       | 768 (90.2)                                               |          | 121 (14.3)                                                                          | 726 (85.7)                                     |          |
|                                                                                                                                                            |                                                                                                                                |                                                          |          |                                                                                     |                                                |          |
| <b>Do you own a car?</b>                                                                                                                                   |                                                                                                                                |                                                          |          |                                                                                     |                                                |          |
| I do not own a car                                                                                                                                         | 244 (9.6)                                                                                                                      | 2299 (90.4)                                              | <.001    | 222 (8.8)                                                                           | 2308 (91.2)                                    | 0.276    |
| I own a car                                                                                                                                                | 592 (13.9)                                                                                                                     | 3668 (86.1)                                              |          | 341 (8.0)                                                                           | 3911 (92.0)                                    |          |
|                                                                                                                                                            |                                                                                                                                |                                                          |          |                                                                                     |                                                |          |

1  
2  
3  
4  
5  
6  
7  
8  
9  
10  
11  
12  
13  
14  
15  
16  
17  
18  
19  
20  
21  
22  
23  
24  
25  
26  
27  
28  
29  
30  
31  
32  
33  
34  
35  
36  
37  
38  
39  
40  
41  
42  
43  
44  
45  
46  
47

| <b>Table 1. Association of Demographic, Residential, Household, and COVID-19-related Variables with Working in Health Care Setting and COVID-19-related Harassment and Bullying</b> |                                                                                                                                       |                                                                 |                 |                                                                                            |                                                       |                 |
|-------------------------------------------------------------------------------------------------------------------------------------------------------------------------------------|---------------------------------------------------------------------------------------------------------------------------------------|-----------------------------------------------------------------|-----------------|--------------------------------------------------------------------------------------------|-------------------------------------------------------|-----------------|
|                                                                                                                                                                                     | <b>Do you work in a health care delivery setting, such as a doctor's office, clinic, hospital, nursing home, or dentist's office?</b> |                                                                 |                 | <b>Have you or a family member been harassed, bullied, or hurt because of coronavirus?</b> |                                                       |                 |
|                                                                                                                                                                                     | <b>Yes (checked), I do work in a health care setting</b>                                                                              | <b>No (not checked), I do not work in a health care setting</b> | <b>p-value*</b> | <b>Yes, I or someone have/has been bullied</b>                                             | <b>No, I or someone have not/has not been bullied</b> | <b>p-value*</b> |
|                                                                                                                                                                                     | <b>(n=837)</b>                                                                                                                        | <b>(n=6574)</b>                                                 |                 | <b>(n=595)</b>                                                                             | <b>(n=6456)</b>                                       |                 |
| <b>Do you own a home?</b>                                                                                                                                                           |                                                                                                                                       |                                                                 |                 |                                                                                            |                                                       |                 |
| I do not own a home                                                                                                                                                                 | 263 (10.2)                                                                                                                            | 2305 (89.8)                                                     | <.001           | 231 (9.0)                                                                                  | 2324 (91.0)                                           | 0.092           |
| I own a home                                                                                                                                                                        | 570 (13.5)                                                                                                                            | 3655 (86.5)                                                     |                 | 332 (7.9)                                                                                  | 3884 (92.1)                                           |                 |
| <b>Do people who have had coronavirus infection (or COVID-19) lose respect or status in the community?</b>                                                                          |                                                                                                                                       |                                                                 |                 |                                                                                            |                                                       |                 |
| People with COVID-19 lose status in the community                                                                                                                                   | 306 (20.2)                                                                                                                            | 1208 (79.8)                                                     |                 | 264 (17.5)                                                                                 | 1241 (82.5)                                           | <.001           |
| People with COVID-19 do not lose status in the community                                                                                                                            | 530 (9.8)                                                                                                                             | 4865 (90.2)                                                     |                 | 309 (5.7)                                                                                  | 5079 (94.3)                                           |                 |
| <b>Do people talk badly or gossip about other people who are living with, have had, or are thought to have coronavirus infection (or COVID-19)?</b>                                 |                                                                                                                                       |                                                                 |                 |                                                                                            |                                                       |                 |
| People gossip about other people with COVID-19                                                                                                                                      | 353 (18.8)                                                                                                                            | 1525 (81.2)                                                     | <.001           | 274 (14.6)                                                                                 | 1598 (85.4)                                           | <.001           |
| People do not gossip about other people with COVID-19                                                                                                                               | 476 (9.5)                                                                                                                             | 4532 (90.5)                                                     |                 | 297 (5.9)                                                                                  | 4702 (94.1)                                           |                 |
| * p-value ( $\chi^2$ )                                                                                                                                                              |                                                                                                                                       |                                                                 |                 |                                                                                            |                                                       |                 |

**Table 2. Bivariate and Multivariate Analysis of Work in Health Care Settings and COVID-19-related Harassment and Bullying**

|                                                                                                                                                                   | 7e. Have you or a family member been harassed, bullied, or hurt because of coronavirus? |                                                          |                |            |         | Model 1: Unadjusted Odds Ratio (OR; 95% CI) | Model 2: Adjusted* Odds Ratio (aOR; 95% CI) |
|-------------------------------------------------------------------------------------------------------------------------------------------------------------------|-----------------------------------------------------------------------------------------|----------------------------------------------------------|----------------|------------|---------|---------------------------------------------|---------------------------------------------|
|                                                                                                                                                                   | Yes, I or someone have/ has been bullied (n=595)                                        | No, I or someone have not/ has not been bullied (n=6456) | Total (n=7051) | Chi-square | p-value |                                             |                                             |
| <b>Do you or anyone in your household work in a health care delivery setting, such as a doctor's office, clinic, hospital, nursing home, or dentist's office?</b> |                                                                                         |                                                          |                |            |         |                                             |                                             |
| I work in a health care setting                                                                                                                                   | 151 (18.1)                                                                              | 685 (81.9)                                               | 836            | 113.689    | <.001   | 2.9 (2.3, 3.5)                              | 1.5 (1.2, 1.9)                              |
| I do not work in a health care setting                                                                                                                            | 444 (7.1)                                                                               | 5771 (92.9)                                              | 6215           |            |         |                                             |                                             |

\*Adjusted for: Could not work from home, Have/ have had COVID-19, Have not closely followed social-physical distancing, Have friend/ family/ neighbor with COVID-19, Have friend/ family/ neighbor who died from COVID-19, Have at least one chronic disease, Have child care responsibilities, Have elder care responsibilities, Reside in Africa/ Asia/ Northern America/ Oceania

**Table 3: Frequency of qualitative codes applied to COVID-19-related harassment/ bullied/ hurt excerpts**

| Qualitative Code ( <i>7e. Been harassed, bullied, or hurt because of coronavirus, please explain</i> ) | Applied to excerpts (# (%)) (n=327) | Example quotation                                                                                                                                                                                                                                                                                                         |
|--------------------------------------------------------------------------------------------------------|-------------------------------------|---------------------------------------------------------------------------------------------------------------------------------------------------------------------------------------------------------------------------------------------------------------------------------------------------------------------------|
| Happened in/ related to the community                                                                  | 109 (33.1)                          | <i>Mi sobrina que es Medica, la Hostigan en su domicilio los vecinos diciendolae que se valla de alli...</i> (My niece, who is a doctor, is harassed at her home by the neighbors telling her to get out of there...) (Participant from South America)                                                                    |
| Happened with police/ government officials                                                             | 45 (13.7)                           | <i>The military police use very high handed methods at roadblocks and when the curfew hours start in the evening. I will just say it like that.</i> (Male participant, 50s, from Sub-Saharan Africa)                                                                                                                      |
| Involved violence                                                                                      | 44 (13.4)                           | <i>Son [is] deputy supermarket manager - has been threatened and verbally abused at work.</i> (Participant from Western Europe, 60s)                                                                                                                                                                                      |
| Racism                                                                                                 | 27 (8.2)                            | <i>My partner and his family as Asian, and they have been on the receiving end of racist remarks and harassment for the last 3 months because of this virus. (Early 20s, other gender, Northern Europe)</i>                                                                                                               |
| Happened in social media/ popular media                                                                | 23 (7.0)                            | <i>Verbal harassment on social media from COVID-19 nay-sayers</i> (Male participant, 60s, North America)                                                                                                                                                                                                                  |
| Happened in/ related to work                                                                           | 21 (6.4)                            | <i>Mi esposa trabaja en un hospital. Los vecinos no nos hablan.</i> (My wife works in a hospital. Neighbors don't speak to us.) (Male participant, 30s, Caribbean)                                                                                                                                                        |
| Happened within the family                                                                             | 19 (5.8)                            | <i>We were harassed and bullied by our overseas family, they called us cowards and a lot of other nasty things and tried to pressure us into continuing with overseas travel plans (we had asked them not to visit us as previously planned due to concerns about the virus).</i> (Female participant, 20s, from Oceania) |
| Bullied for wearing mask                                                                               | 15 (4.6)                            | <i>Yelled at for wearing a mask. Coughed on at a gas station. Just hate going out...</i> (Female participant, 60s, from North America)                                                                                                                                                                                    |
| Bullied for NOT wearing a mask                                                                         | 7 (2.1)                             | <i>E' stato picchiato poichè non aveva la mascherina. Ma non è colpa sua se non è possibile comprarle o trovarle nei negozi..</i> (He was beaten because he didn't have a mask. But it's not his fault that you can't buy them or find them in stores.) (Male participant, 20s, from Southern Europe)                     |

# Global Coronavirus Survey

Welcome! You are invited to participate in a global epidemiological survey from the University of Rochester to help us better understand attitudes, beliefs, and knowledge about topics related to current public health issues, such as coronavirus, COVID-19, and other infectious diseases, and the factors that might relate to them. If you're 18 years old or older and can answer the survey in English, please proceed below!

For peer review only

1  
2  
3  
4  
5  
6  
7  
8  
9  
10  
11  
12  
13  
14  
15  
16  
17  
18  
19  
20  
21  
22  
23  
24  
25  
26  
27  
28  
29  
30  
31  
32  
33  
34  
35  
36  
37  
38  
39  
40  
41  
42  
43  
44  
45  
46  
47  
48  
49  
50  
51  
52  
53  
54  
55  
56  
57  
58  
59  
60



1  
2  
3  
4  
5 SCHOOL OF MEDICINE AND DENTISTRY

6  
7 Department of Obstetrics & Gynecology



8  
9  
10  
11 **Global Coronavirus Survey: Opinions and Practices**  
12 **Principal Investigator:** Timothy Dye, PhD and Eva Pressman, MD

13  
14 This form describes a research study that is being conducted by faculty from the University of Rochester's  
15 School of Medicine and Dentistry.

16 The purpose of this study is to better understand attitudes, beliefs, and knowledge about some topics related  
17 to current public health issues, such as coronavirus and other infectious diseases, and the factors that  
18 might relate to them. The study includes questions about your thoughts and experiences about  
19 coronavirus and COVID-19, physical and mental health, stress, social support, and demographic  
20 questions. You can skip any question you wish.

21  
22 If you decide to take part in this study, you will be asked to complete a survey through a link you can reach  
23 on the internet. It will take about 20-40 minutes to complete the survey. We estimate that approximately  
24 7000 people will take part in this study.

25 The risks of participation are minimal. Some of the questions may be upsetting or make you feel  
26 uncomfortable. You can skip any of the questions you do not want to answer. To protect the  
27 confidentiality of the data, data will be transmitted in an encrypted format (readable only to authorized  
28 personnel). There are no expected benefits.

29 You will not receive compensation to participate in this survey.

30  
31 The University of Rochester makes every effort to keep the information collected from you private. Results  
32 of the research may be presented at meetings or in publications, and will not identify specific people who  
33 responded. The University of Rochester is receiving payment from the Mae Stone Goode Foundation for  
34 conducting this research study.

35 **Your participation in this study is completely voluntary.** You do not have to participate and you can stop  
36 the survey at any time. If you choose to stop, we cannot delete your information since we do not collect  
37 any identifying information and would be unable to find and delete your record.

38  
39 For more information or questions about this research you may contact Dr. Timothy Dye at  
40 [tim\\_dye@urmc.rochester.edu](mailto:tim_dye@urmc.rochester.edu).

41 Please contact the University of Rochester Research Subjects Review Board at 265 Crittenden Blvd., CU  
42 420315, Rochester, NY 14642, Telephone +1 (585) 276-0005 or +1 (877) 449-4441 for the following  
43 reasons:

- 44  
45 • You wish to talk to someone other than the research staff about your rights as a research subject;  
46 • To voice concerns about the research.

47  
48  
49  
50  
51  
52  
53  
54  
55 RSRB STUDY00004825  
56 Version Date: April 28, 2020

57 RSRB Approval Date: 4/28/2020

---

1 Information  
2 Sheet  
3  
4  
5

6 Study Title: Global Coronavirus Survey: Opinions and Practices  
7

8 Principal Investigators: Dr. Timothy Dye, Dr. Eva Pressman  
9

10  
11 This form describes a research study that is being conducted by faculty from the University of Rochester's School of  
12 Medicine and Dentistry.

13 The purpose of this study is to better understand attitudes, beliefs, and knowledge about some topics related to  
14 current public health issues, such as coronavirus and other infectious diseases, and the factors that might relate to  
15 them.  
16

17 The risks of participation are minimal. Some of the questions may be upsetting or make you feel uncomfortable. You  
18 can skip any of the questions you do not want to answer. To protect the confidentiality of the data, data will be  
19 transmitted in an encrypted format (readable only to authorized personnel). There are no expected benefits.  
20

21 The University of Rochester makes every effort to keep the information collected from you private. Results of the  
22 research may be presented at meetings or in publications, and will not identify specific people who responded.  
23

24 Your participation in this study is completely voluntary. You are free not to participate or to withdraw at any time, for  
25 whatever reason.  
26

27 For more information or questions about this research you may contact Dr. Timothy Dye at +1 585-276-6953 and  
28 tim\_dye@urmc.rochester.edu.  
29

30 Please contact the University of Rochester Research Subjects Review Board at 265 Crittenden Blvd., CU 420315,  
31 Rochester, NY 14642, Telephone +1 (585) 276-0005 or +1 (877) 449-4441 for the following reasons:  
32

- 33 • You wish to talk to someone other than the research staff about your rights as a research subject;
- 34 • To voice concerns about the research.  
35  
36

---

37  
38  
39  
40  
41 Continue with the survey?

- Yes  
 No

**Section 1: Country Questions**

1  
2  
3  
4  
5  
6  
7  
8  
9  
10  
11  
12  
13  
14  
15  
16  
17  
18  
19  
20  
21  
22  
23  
24  
25  
26  
27  
28  
29  
30  
31  
32  
33  
34  
35  
36  
37  
38  
39  
40  
41  
42  
43  
44  
45  
46  
47  
48  
49  
50  
51  
52  
53  
54  
55  
56  
57  
58  
59  
60

For peer review only

1 1. What country do you live in?  
2  
3  
4  
5  
6  
7  
8  
9  
10  
11  
12  
13  
14  
15  
16  
17  
18  
19  
20  
21  
22  
23  
24  
25  
26  
27  
28  
29  
30  
31  
32  
33  
34  
35  
36  
37  
38  
39  
40  
41  
42  
43  
44  
45  
46  
47  
48  
49  
50  
51  
52  
53  
54  
55  
56  
57  
58  
59  
60

- Afghanistan
- Åland Islands
- Albania
- Algeria
- American Samoa
- Andorra
- Angola
- Anguilla
- Antarctica[a]
- Antigua and Barbuda
- Argentina
- Armenia
- Aruba
- Australia[b]
- Austria
- Azerbaijan
- Bahamas (the)
- Bahrain
- Bangladesh
- Barbados
- Belarus
- Belgium
- Belize
- Benin
- Bermuda
- Bhutan
- Bolivia (Plurinational State of)
- Bonaire
- Sint Eustatius
- Saba
- Bosnia and Herzegovina
- Botswana
- Bouvet Island
- Brazil
- British Indian Ocean Territory (the)
- Brunei Darussalam[e]
- Bulgaria
- Burkina Faso
- Burundi
- Cabo Verde[f]
- Cambodia
- Cameroon
- Canada
- Cayman Islands (the)
- Central African Republic (the)
- Chad
- Chile
- China
- Christmas Island
- Cocos (Keeling) Islands (the)
- Colombia
- Comoros (the)
- Congo (the Democratic Republic of the)
- Congo (the)[g]
- Cook Islands (the)
- Costa Rica
- Côte d'Ivoire[h]
- Croatia
- Cuba
- Curaçao
- Cyprus
- Czechia[i]
- Denmark
- Djibouti
- Dominica
- Dominican Republic (the)
- Ecuador
- Egypt
- El Salvador

1  
2  
3  
4  
5  
6  
7  
8  
9  
10  
11  
12  
13  
14  
15  
16  
17  
18  
19  
20  
21  
22  
23  
24  
25  
26  
27  
28  
29  
30  
31  
32  
33  
34  
35  
36  
37  
38  
39  
40  
41  
42  
43  
44  
45  
46  
47  
48  
49  
50  
51  
52  
53  
54  
55  
56  
57  
58  
59  
60

- Equatorial Guinea
- Eritrea
- Estonia
- Eswatini[j]
- Ethiopia
- Falkland Islands (the) [Malvinas][k]
- Faroe Islands (the)
- Fiji
- Finland
- France[l]
- French Guiana
- French Polynesia
- French Southern Territories (the)[m]
- Gabon
- Gambia (the)
- Georgia
- Germany
- Ghana
- Gibraltar
- Greece
- Greenland
- Grenada
- Guadeloupe
- Guam
- Guatemala
- Guernsey
- Guinea
- Guinea-Bissau
- Guyana
- Heard Island and McDonald Islands
- Holy See (the)[n]
- Honduras
- Hong Kong
- Hungary
- Iceland
- India
- Indonesia
- Iran (Islamic Republic of)
- Iraq
- Ireland
- Isle of Man
- Israel
- Italy
- Jamaica
- Japan
- Jersey
- Jordan
- Kazakhstan
- Kenya
- Kiribati
- Korea (the Democratic People's Republic of)[o]
- Korea (the Republic of)[p]
- Kuwait
- Kyrgyzstan
- Lao People's Democratic Republic (the)[q]
- Latvia
- Lebanon
- Lesotho
- Liberia
- Libya
- Liechtenstein
- Lithuania
- Luxembourg
- Macao[r]
- North Macedonia[s]
- Madagascar
- Malawi
- Malaysia
- Maldives
- Mali
- Malta

1  
2  
3  
4  
5  
6  
7  
8  
9  
10  
11  
12  
13  
14  
15  
16  
17  
18  
19  
20  
21  
22  
23  
24  
25  
26  
27  
28  
29  
30  
31  
32  
33  
34  
35  
36  
37  
38  
39  
40  
41  
42  
43  
44  
45  
46  
47  
48  
49  
50  
51  
52  
53  
54  
55  
56  
57  
58  
59  
60

- Marshall Islands (the)
- Martinique
- Mauritania
- Mauritius
- Mayotte
- Mexico
- Micronesia (Federated States of)
- Moldova (the Republic of)
- Monaco
- Mongolia
- Montenegro
- Montserrat
- Morocco
- Mozambique
- Myanmar[t]
- Namibia
- Nauru
- Nepal
- Netherlands (the)
- New Caledonia
- New Zealand
- Nicaragua
- Niger (the)
- Nigeria
- Niue
- Norfolk Island
- Northern Mariana Islands (the)
- Norway
- Oman
- Pakistan
- Palau
- Palestine, State of
- Panama
- Papua New Guinea
- Paraguay
- Peru
- Philippines (the)
- Pitcairn[u]
- Poland
- Portugal
- Puerto Rico
- Qatar
- Réunion
- Romania
- Russian Federation (the)[v]
- Rwanda
- Saint Barthélemy
- Saint Helena
- Ascension Island
- Tristan da Cunha
- Saint Kitts and Nevis
- Saint Lucia
- Saint Martin (French part)
- Saint Pierre and Miquelon
- Saint Vincent and the Grenadines
- Samoa
- San Marino
- Sao Tome and Principe
- Saudi Arabia
- Senegal
- Serbia
- Seychelles
- Sierra Leone
- Singapore
- Sint Maarten (Dutch part)
- Slovakia
- Slovenia
- Solomon Islands
- Somalia
- South Africa
- South Georgia and the South Sandwich Islands

1  
2  
3  
4  
5  
6  
7  
8  
9  
10  
11  
12  
13  
14  
15  
16  
17  
18  
19  
20  
21  
22  
23  
24  
25  
26  
27  
28  
29  
30  
31  
32  
33  
34  
35  
36  
37  
38  
39  
40  
41  
42  
43  
44  
45  
46  
47  
48  
49  
50  
51  
52  
53  
54  
55  
56  
57  
58  
59  
60

- South Sudan
- Spain
- Sri Lanka
- Sudan (the)
- Suriname
- Svalbard
- Jan Mayen
- Sweden
- Switzerland
- Syrian Arab Republic (the)[x]
- Taiwan (Province of China)[y]
- Tajikistan
- Tanzania, the United Republic of
- Thailand
- Timor-Leste[aa]
- Togo
- Tokelau
- Tonga
- Trinidad and Tobago
- Tunisia
- Turkey
- Turkmenistan
- Turks and Caicos Islands (the)
- Tuvalu
- Uganda
- Ukraine
- United Arab Emirates (the)
- United Kingdom of Great Britain and Northern Ireland (the)
- United States Minor Outlying Islands (the)[ac]
- United States of America (the)
- Uruguay
- Uzbekistan
- Vanuatu
- Venezuela (Bolivarian Republic of)
- Viet Nam[ae]
- Virgin Islands (British)[af]
- Virgin Islands (U.S.)[ag]
- Wallis and Futuna
- Western Sahara[ah]
- Yemen
- Zambia
- Zimbabwe
- Other

---

Live in Other Country, please specify

---

1b. For US residents, what State do you live in?

- New York
- Alabama
- Alaska
- Arizona
- Arkansas
- California
- Colorado
- Connecticut
- Delaware
- Florida
- Georgia
- Hawaii
- Idaho
- Illinois
- Indiana
- Iowa
- Kansas
- Kentucky
- Louisiana
- Maine
- Maryland
- Massachusetts
- Michigan
- Minnesota
- Mississippi
- Missouri
- Montana
- Nebraska
- Nevada
- New Hampshire
- New Jersey
- New Mexico
- North Carolina
- North Dakota
- Ohio
- Oklahoma
- Oregon
- Pennsylvania
- Rhode Island
- South Carolina
- South Dakota
- Tennessee
- Texas
- Utah
- Vermont
- Virginia
- Washington
- West Virginia
- Wisconsin
- Wyoming



1c. Indian residents, what state do you live in?

- IN-AP = Andhra Pradesh
- IN-AR = Arunachal Pradesh
- IN-AS = Assam
- IN-BR = Bihar
- IN-CT = Chhattisgarh
- IN-GA = Goa
- IN-GJ = Gujarat
- IN-HR = Haryana
- IN-HP = Himachal Pradesh
- IN-JH = Jharkhand
- IN-KA = Karnataka
- IN-KL = Kerala
- IN-MP = Madhya Pradesh
- IN-MH = Maharashtra
- IN-MN = Manipur
- IN-ML = Meghalaya
- IN-MZ = Mizoram
- IN-NL = Nagaland
- IN-OR = Odisha
- IN-PB = Punjab
- IN-RJ = Rajasthan
- IN-SK = Sikkim
- IN-TN = Tamil Nadu
- IN-TG = Telangana
- IN-TR = Tripura
- IN-UT = Uttarakhand
- IN-UP = Uttar Pradesh
- IN-WB = West Bengal
- IN-AN = Andaman and Nicobar Islands
- IN-CH = Chandigarh
- IN-DN = Dadra and Nagar Haveli
- IN-DD = Daman and Diu
- IN-DL = Delhi
- IN-JK = Jammu and Kashmir
- IN-LA = Ladakh
- IN-LD = Lakshadweep
- IN-PY = Puducherry

1 2. What country were you born in?  
2  
3  
4  
5  
6  
7  
8  
9  
10  
11  
12  
13  
14  
15  
16  
17  
18  
19  
20  
21  
22  
23  
24  
25  
26  
27  
28  
29  
30  
31  
32  
33  
34  
35  
36  
37  
38  
39  
40  
41  
42  
43  
44  
45  
46  
47  
48  
49  
50  
51  
52  
53  
54  
55  
56  
57  
58  
59  
60

- Afghanistan
- Åland Islands
- Albania
- Algeria
- American Samoa
- Andorra
- Angola
- Anguilla
- Antarctica[a]
- Antigua and Barbuda
- Argentina
- Armenia
- Aruba
- Australia[b]
- Austria
- Azerbaijan
- Bahamas (the)
- Bahrain
- Bangladesh
- Barbados
- Belarus
- Belgium
- Belize
- Benin
- Bermuda
- Bhutan
- Bolivia (Plurinational State of)
- Bonaire
- Sint Eustatius
- Saba
- Bosnia and Herzegovina
- Botswana
- Bouvet Island
- Brazil
- British Indian Ocean Territory (the)
- Brunei Darussalam[e]
- Bulgaria
- Burkina Faso
- Burundi
- Cabo Verde[f]
- Cambodia
- Cameroon
- Canada
- Cayman Islands (the)
- Central African Republic (the)
- Chad
- Chile
- China
- Christmas Island
- Cocos (Keeling) Islands (the)
- Colombia
- Comoros (the)
- Congo (the Democratic Republic of the)
- Congo (the)[g]
- Cook Islands (the)
- Costa Rica
- Côte d'Ivoire[h]
- Croatia
- Cuba
- Curaçao
- Cyprus
- Czechia[i]
- Denmark
- Djibouti
- Dominica
- Dominican Republic (the)
- Ecuador
- Egypt
- El Salvador

1  
2  
3  
4  
5  
6  
7  
8  
9  
10  
11  
12  
13  
14  
15  
16  
17  
18  
19  
20  
21  
22  
23  
24  
25  
26  
27  
28  
29  
30  
31  
32  
33  
34  
35  
36  
37  
38  
39  
40  
41  
42  
43  
44  
45  
46  
47  
48  
49  
50  
51  
52  
53  
54  
55  
56  
57  
58  
59  
60

- Equatorial Guinea
- Eritrea
- Estonia
- Eswatini[j]
- Ethiopia
- Falkland Islands (the) [Malvinas][k]
- Faroe Islands (the)
- Fiji
- Finland
- France[l]
- French Guiana
- French Polynesia
- French Southern Territories (the)[m]
- Gabon
- Gambia (the)
- Georgia
- Germany
- Ghana
- Gibraltar
- Greece
- Greenland
- Grenada
- Guadeloupe
- Guam
- Guatemala
- Guernsey
- Guinea
- Guinea-Bissau
- Guyana
- Heard Island and McDonald Islands
- Holy See (the)[n]
- Honduras
- Hong Kong
- Hungary
- Iceland
- India
- Indonesia
- Iran (Islamic Republic of)
- Iraq
- Ireland
- Isle of Man
- Israel
- Italy
- Jamaica
- Japan
- Jersey
- Jordan
- Kazakhstan
- Kenya
- Kiribati
- Korea (the Democratic People's Republic of)[o]
- Korea (the Republic of)[p]
- Kuwait
- Kyrgyzstan
- Lao People's Democratic Republic (the)[q]
- Latvia
- Lebanon
- Lesotho
- Liberia
- Libya
- Liechtenstein
- Lithuania
- Luxembourg
- Macao[r]
- North Macedonia[s]
- Madagascar
- Malawi
- Malaysia
- Maldives
- Mali
- Malta

1  
2  
3  
4  
5  
6  
7  
8  
9  
10  
11  
12  
13  
14  
15  
16  
17  
18  
19  
20  
21  
22  
23  
24  
25  
26  
27  
28  
29  
30  
31  
32  
33  
34  
35  
36  
37  
38  
39  
40  
41  
42  
43  
44  
45  
46  
47  
48  
49  
50  
51  
52  
53  
54  
55  
56  
57  
58  
59  
60

- Marshall Islands (the)
- Martinique
- Mauritania
- Mauritius
- Mayotte
- Mexico
- Micronesia (Federated States of)
- Moldova (the Republic of)
- Monaco
- Mongolia
- Montenegro
- Montserrat
- Morocco
- Mozambique
- Myanmar[t]
- Namibia
- Nauru
- Nepal
- Netherlands (the)
- New Caledonia
- New Zealand
- Nicaragua
- Niger (the)
- Nigeria
- Niue
- Norfolk Island
- Northern Mariana Islands (the)
- Norway
- Oman
- Pakistan
- Palau
- Palestine, State of
- Panama
- Papua New Guinea
- Paraguay
- Peru
- Philippines (the)
- Pitcairn[u]
- Poland
- Portugal
- Puerto Rico
- Qatar
- Réunion
- Romania
- Russian Federation (the)[v]
- Rwanda
- Saint Barthélemy
- Saint Helena
- Ascension Island
- Tristan da Cunha
- Saint Kitts and Nevis
- Saint Lucia
- Saint Martin (French part)
- Saint Pierre and Miquelon
- Saint Vincent and the Grenadines
- Samoa
- San Marino
- Sao Tome and Principe
- Saudi Arabia
- Senegal
- Serbia
- Seychelles
- Sierra Leone
- Singapore
- Sint Maarten (Dutch part)
- Slovakia
- Slovenia
- Solomon Islands
- Somalia
- South Africa
- South Georgia and the South Sandwich Islands

- 1  South Sudan  
2  Spain  
3  Sri Lanka  
4  Sudan (the)  
5  Suriname  
6  Svalbard  
7  Jan Mayen  
8  Sweden  
9  Switzerland  
10  Syrian Arab Republic (the)[x]  
11  Taiwan (Province of China)[y]  
12  Tajikistan  
13  Tanzania, the United Republic of  
14  Thailand  
15  Timor-Leste[aa]  
16  Togo  
17  Tokelau  
18  Tonga  
19  Trinidad and Tobago  
20  Tunisia  
21  Turkey  
22  Turkmenistan  
23  Turks and Caicos Islands (the)  
24  Tuvalu  
25  Uganda  
26  Ukraine  
27  United Arab Emirates (the)  
28  United Kingdom of Great Britain and Northern  
29  Ireland (the)  
30  United States Minor Outlying Islands (the)[ac]  
31  United States of America (the)  
32  Uruguay  
33  Uzbekistan  
34  Vanuatu  
35  Venezuela (Bolivarian Republic of)  
36  Viet Nam[ae]  
37  Virgin Islands (British)[af]  
38  Virgin Islands (U.S.)[ag]  
39  Wallis and Futuna  
40  Western Sahara[ah]  
41  Yemen  
42  Zambia  
43  Zimbabwe  
44  Other

---

Born in Other Country, please specify:

---

**Section 2: Health Attitudes**

**Each item below is a belief statement about your health with which you may agree or disagree. This is a measure of your personal beliefs; there are no right or wrong answers. Please tell us how strongly you agree or disagree with each item.**

|                                                                                      | Strongly disagree     | Disagree              | Neither disagree nor agree | Agree                 | Strongly agree        |
|--------------------------------------------------------------------------------------|-----------------------|-----------------------|----------------------------|-----------------------|-----------------------|
| 1. If I get sick, it is my own behavior which determines how soon I get well again.  | <input type="radio"/> | <input type="radio"/> | <input type="radio"/>      | <input type="radio"/> | <input type="radio"/> |
| 2. No matter what I do, if I am going to get sick, I will get sick.                  | <input type="radio"/> | <input type="radio"/> | <input type="radio"/>      | <input type="radio"/> | <input type="radio"/> |
| 3. Having regular contact with my physician is the best way for me to avoid illness. | <input type="radio"/> | <input type="radio"/> | <input type="radio"/>      | <input type="radio"/> | <input type="radio"/> |
| 4. Most things that affect my health happen to me by accident.                       | <input type="radio"/> | <input type="radio"/> | <input type="radio"/>      | <input type="radio"/> | <input type="radio"/> |
| 5. Whenever I don't feel well, I should consult a medically trained professional.    | <input type="radio"/> | <input type="radio"/> | <input type="radio"/>      | <input type="radio"/> | <input type="radio"/> |
| 6. I am in control of my health.                                                     | <input type="radio"/> | <input type="radio"/> | <input type="radio"/>      | <input type="radio"/> | <input type="radio"/> |
| 7. My family has a lot to do with my becoming sick or staying healthy.               | <input type="radio"/> | <input type="radio"/> | <input type="radio"/>      | <input type="radio"/> | <input type="radio"/> |
| 8. When I get sick, I am to blame.                                                   | <input type="radio"/> | <input type="radio"/> | <input type="radio"/>      | <input type="radio"/> | <input type="radio"/> |
| 9. Luck plays a big part in determining how soon I will recover from an illness.     | <input type="radio"/> | <input type="radio"/> | <input type="radio"/>      | <input type="radio"/> | <input type="radio"/> |
| 10. Health professionals control my health                                           | <input type="radio"/> | <input type="radio"/> | <input type="radio"/>      | <input type="radio"/> | <input type="radio"/> |
| 11. My good health is largely a matter of good fortune.                              | <input type="radio"/> | <input type="radio"/> | <input type="radio"/>      | <input type="radio"/> | <input type="radio"/> |
| 12. The main thing which affects my health is what I myself do                       | <input type="radio"/> | <input type="radio"/> | <input type="radio"/>      | <input type="radio"/> | <input type="radio"/> |
| 13. If I take care of myself, I can avoid illness.                                   | <input type="radio"/> | <input type="radio"/> | <input type="radio"/>      | <input type="radio"/> | <input type="radio"/> |

- 1 14. Whenever I recover from an illness, its usually because other  
2 people (for example, doctors,  
3 nurses, family, friends) have  
4 been taking good care of me.
- 6  
7
- 8 15. No matter what I do, I'm  
9 likely to get sick.
- 10
- 11 16. If it's meant to be, I will stay  
12 healthy.
- 13
- 14 17. If I take the right actions, I  
15 can stay healthy.
- 16 18. Regarding my health, I can  
17 only do what my doctor tells me  
18 to do.
- 19  
20  
21  
22  
23  
24  
25  
26  
27  
28  
29  
30  
31  
32  
33  
34  
35  
36  
37  
38  
39  
40  
41  
42  
43  
44  
45  
46  
47  
48  
49  
50  
51  
52  
53  
54  
55  
56  
57  
58  
59  
60

For peer review only

**Section 3 - Beliefs about Coronavirus****1. As far as you know, have public health experts recommended these actions as a way to help slow the spread of coronavirus?**

|                                                     | Yes, recommended      | No, not recommended   | Don't Know            |
|-----------------------------------------------------|-----------------------|-----------------------|-----------------------|
| a. Frequent hand washing                            | <input type="radio"/> | <input type="radio"/> | <input type="radio"/> |
| b. Boil water before drinking                       | <input type="radio"/> | <input type="radio"/> | <input type="radio"/> |
| c. Healthy people wearing facemasks in public       | <input type="radio"/> | <input type="radio"/> | <input type="radio"/> |
| d. Avoiding gatherings with large numbers of people | <input type="radio"/> | <input type="radio"/> | <input type="radio"/> |
| e. Using mosquito repellent                         | <input type="radio"/> | <input type="radio"/> | <input type="radio"/> |
| f. Staying home if you are feeling sick             | <input type="radio"/> | <input type="radio"/> | <input type="radio"/> |

g. Other recommendations

---



**2. As far as you know, which of the following is a way that coronavirus is transmitted, or spread?**

Yes, transmitted this way      No, not transmitted this way      Don't Know

a. Being in close physical proximity with someone who is infected                 

b. Touching surfaces that contain small amounts of bodily fluids from someone who is infected                 

c. Through mosquito bites                 

d. Through genes/ genetics                 

e. What other ways is coronavirus transmitted or spread? Please explain.

\_\_\_\_\_

For peer review only

**3. For each of the following, please tell us if you think this is a common symptom of coronavirus infection (COVID-19)**

|                                 | Yes, a symptom        | No, not a symptom     | Don't know            |
|---------------------------------|-----------------------|-----------------------|-----------------------|
| a. Fever                        | <input type="radio"/> | <input type="radio"/> | <input type="radio"/> |
| b. Dry cough                    | <input type="radio"/> | <input type="radio"/> | <input type="radio"/> |
| c. Vomiting                     | <input type="radio"/> | <input type="radio"/> | <input type="radio"/> |
| d. Nasal congestion/ runny nose | <input type="radio"/> | <input type="radio"/> | <input type="radio"/> |
| e. Rash                         | <input type="radio"/> | <input type="radio"/> | <input type="radio"/> |

f. Other Symptoms (Please describe:)

---

For peer review only

1 **4. Do you think any of the groups below have a higher risk of developing serious medical**  
2 **issues if they become infected with coronavirus?**

|                                 | Yes, higher risk      | No, not higher risk   | Don't know            |
|---------------------------------|-----------------------|-----------------------|-----------------------|
| 3                               |                       |                       |                       |
| 4                               |                       |                       |                       |
| 5 a. Children                   | <input type="radio"/> | <input type="radio"/> | <input type="radio"/> |
| 6 b. Pregnant women             | <input type="radio"/> | <input type="radio"/> | <input type="radio"/> |
| 7 c. People with chronic health | <input type="radio"/> | <input type="radio"/> | <input type="radio"/> |
| 8 conditions                    |                       |                       |                       |
| 9                               |                       |                       |                       |
| 10 d. People in their early 20s | <input type="radio"/> | <input type="radio"/> | <input type="radio"/> |
| 11 e. People with obesity       | <input type="radio"/> | <input type="radio"/> | <input type="radio"/> |
| 12 f. People over 60            | <input type="radio"/> | <input type="radio"/> | <input type="radio"/> |
| 13                              |                       |                       |                       |
| 14                              |                       |                       |                       |
| 15                              |                       |                       |                       |

16 5. As far as you know, is there a vaccine to protect  
17 people from the current coronavirus, also known as  
18 COVID-19, or not?  Yes  No  Don't know

19

20 6. As far as you know, does the vaccine for influenza,  
21 or seasonal flu, protect people from the current  
22 coronavirus, also known as COVID-19, or not?  Yes  No  Don't know

23

24 7. As far as you know, if someone thinks they are  
25 having symptoms of coronavirus, what should they do?  Stay home and call a doctor or medical provider  
26  Seek health care immediately at an emergency room  
27 or urgent care facility  
28  Something else  
29  Don't Know

30

31 7a. Something else, please explain

32 \_\_\_\_\_

33

34

35

36

37

38

39

40

41

42

43

44

45

46

47

48

49

50

51

52

53

54

55

56

57

58

59

60

**Section 4 - Health Concerns and Experience**

1. Do you feel you have enough information about how to protect yourself and your family from coronavirus?

- Yes
- No
- Don't Know

2. What, if anything, are you doing to protect yourself and your family from coronavirus?

\_\_\_\_\_

3. Do you feel that worry or stress related to coronavirus has had a negative impact on your mental health, or not?

- Yes- major impact
- Yes - minor impact
- No
- Don't Know

3b. Please explain:

\_\_\_\_\_

For peer review only

**q4. How effective do you feel each of the following groups have been in taking action against coronavirus and COVID-19?**

- a. The healthcare system (including hospitals, clinics, doctors, nurses, and other health providers)
- Not effective at all
  - Not very effective
  - Somewhat effective
  - Very effective

a. Please explain:

---

- b. Science (including researchers and analysts)
- Not effective at all
  - Not very effective
  - Somewhat effective
  - Very effective

b. Please explain:

---

- c. The government (including local and national governments)
- Not effective at all
  - Not very effective
  - Somewhat effective
  - Very effective

c. Please explain:

---

- d. The educational system (including primary schools, secondary schools, and universities)
- Not effective at all
  - Not very effective
  - Somewhat effective
  - Very effective

d. Please explain:

---

- e. Local shops and services (including stores, supermarkets, restaurants)
- Not effective at all
  - Not very effective
  - Somewhat effective
  - Very effective

e. Please explain:

---

- f. Industry (including large employers, factories, manufacturers)
- Not effective at all
  - Not very effective
  - Somewhat effective
  - Very effective

f. Please explain:

---

1 g. The press (including reporters, newspapers,  
2 television and visual media)

- 3  Not effective at all
- 4  Not very effective
- 5  Somewhat effective
- 6  Very effective

7 g. Please explain:

8 \_\_\_\_\_

11 h. Social media platforms

- 12  Not effective at all
- 13  Not very effective
- 14  Somewhat effective
- 15  Very effective

16 h. Please explain:

17 \_\_\_\_\_

For peer review only

1  
2  
3  
4  
5  
6  
7  
8  
9  
10  
11  
12  
13  
14  
15  
16  
17  
18  
19  
20  
21  
22  
23  
24  
25  
26  
27  
28  
29  
30  
31  
32  
33  
34  
35  
36  
37  
38  
39  
40  
41  
42  
43  
44  
45  
46  
47  
48  
49  
50  
51  
52  
53  
54  
55  
56  
57  
58  
59  
60

**5. How worried, if at all, are you about each of the following items?**

|                                                                                                                 | Very worried          | Somewhat worried      | Not too worried       | Not at all worried    | Don't Know            |
|-----------------------------------------------------------------------------------------------------------------|-----------------------|-----------------------|-----------------------|-----------------------|-----------------------|
| a. You or someone in your family will get sick from the coronavirus                                             | <input type="radio"/> |
| b. You will lose income due to a workplace closure or reduced hours because of coronavirus                      | <input type="radio"/> |
| c. That you will become sick with Lyme Disease                                                                  | <input type="radio"/> |
| d. Your investments such as retirement or college savings will be negatively impacted by coronavirus            | <input type="radio"/> |
| e. That you will become sick with dengue                                                                        | <input type="radio"/> |
| f. You will put yourself at risk of exposure to coronavirus because you can't afford to stay home and miss work | <input type="radio"/> |
| g. You will not be able to afford testing or treatment for coronavirus if you need it                           | <input type="radio"/> |

h. Worried about something else, please explain

- A lot
- Some
- Just a little
- Not at all
- Don't Know

5b. Please explain how much, if at all, has your life been disrupted by the coronavirus outbreak?

**6. Please tell us if you have taken any of the following actions because of the recent coronavirus outbreak.**

|                                                                                  | Yes                   | No                    | Don't Know            |
|----------------------------------------------------------------------------------|-----------------------|-----------------------|-----------------------|
| a. Decided not to travel or changed travel plans                                 | <input type="radio"/> | <input type="radio"/> | <input type="radio"/> |
| b. Bought or worn a protective mask                                              | <input type="radio"/> | <input type="radio"/> | <input type="radio"/> |
| c. Stocked up on items such as food and household supplies                       | <input type="radio"/> | <input type="radio"/> | <input type="radio"/> |
| d. Postponed or canceled health care visits                                      | <input type="radio"/> | <input type="radio"/> | <input type="radio"/> |
| e. Got extra refills on prescription medication                                  | <input type="radio"/> | <input type="radio"/> | <input type="radio"/> |
| f. Stayed home instead of going to work school, or other regular activities      | <input type="radio"/> | <input type="radio"/> | <input type="radio"/> |
| g. Postponed or canceled a medical procedure or surgery                          | <input type="radio"/> | <input type="radio"/> | <input type="radio"/> |
| h. Canceled plans to attend large gatherings such as concerts or sporting events | <input type="radio"/> | <input type="radio"/> | <input type="radio"/> |
| i. Quit my job                                                                   | <input type="radio"/> | <input type="radio"/> | <input type="radio"/> |

6b. Please share any explanation or details you would like of the items above:

---



**7. Have you experienced any of the following because of coronavirus?**

7a. Lost income from a job or business

- Yes
- No
- Don't Know

a. Lost income from a job or business, please explain

\_\_\_\_\_

7b. Been unable to get groceries

- Yes
- No
- Don't Know

b. Been unable to get groceries, please explain

\_\_\_\_\_

7c. Been unable to get cleaning supplies or hand sanitizer

- Yes
- No
- Don't Know

7c. Been unable to get cleaning supplies or hand sanitizer, please explain

\_\_\_\_\_

7d. Been unable to get prescription medication

- Yes
- No
- Don't Know

d. Been unable to get prescription medication, please explain

\_\_\_\_\_

7e. Have you or a family member been harassed, bullied, or hurt because of coronavirus

- Yes
- No
- Don't Know

7e. Been harassed, bullied, or hurt because of coronavirus, please explain.

\_\_\_\_\_

8. How closely are you following social or physical distancing, that is, staying at home, away from other people whenever you can, or staying away from other people when in a public place?

- Very closely
- Somewhat closely
- Not very closely
- Not closely at all

Please tell us more about your thoughts and experiences of social or physical distancing: (open ended)

\_\_\_\_\_

9. Have you personally been tested for coronavirus, or not?

- Yes, have been tested
- No, have not been tested
- Don't Know

1 9a. Among those tested: what was the result of the  
2 test for coronavirus?  
3  
4

- Test was positive  
 Test was negative  
 I don't know yet

5 10. Among those not tested: Have you tried to get  
6 tested for coronavirus, or not?  
7  
8

- Yes  
 No  
 Don't Know

9 11. Among those not tested: Do you think you would be  
10 able to get a test for coronavirus if you thought you  
11 needed one, or not?  
12

- Yes  
 No  
 Don't Know

13 11. Please explain where you think you would be able  
14 to get a test for coronavirus if you thought you  
15 needed one.  
16 \_\_\_\_\_  
17

18 11. Please explain why you don't think you would be  
19 able to get a test for coronavirus if you thought you  
20 needed one.  
21 \_\_\_\_\_  
22

23 12. Do you feel you now have - or have you recently  
24 had - coronavirus infection?  
25

- Yes  
 No  
 Don't Know

26 Please explain why you feel you now have - or have you  
27 recently had - coronavirus infection?  
28 \_\_\_\_\_  
29  
30

31 13. If there was a vaccine that prevented people from  
32 getting sick from coronavirus, would you get the  
33 vaccine?  
34

- Yes  
 No  
 Don't Know

35 Please explain why you would get the vaccine if there  
36 was one available?  
37 \_\_\_\_\_  
38

39 Please explain why you would not get the vaccine if  
40 there was one available?  
41 \_\_\_\_\_  
42

43 Please explain why you don't know if you would get the  
44 vaccine if there was one available?  
45 \_\_\_\_\_  
46  
47

48 14. Do you personally know someone who has coronavirus  
49 infection (or COVID-19) check all that apply?  
50

- Yes, a family member  
 Yes, a friend  
 Yes, a neighbor  
 Yes, someone else  
 No  
 I don't know

51 15. Do you personally know someone who has died from  
52 coronavirus infection (or COVID-19) check all that  
53 apply?  
54

- Yes, a family member  
 Yes, a friend  
 Yes, a neighbor  
 Yes, someone else  
 No  
 I don't know

1 16. Do people talk badly or gossip about other people  
2 who are living with, have had, or are thought to have  
3 coronavirus infection (or COVID-19)?  
4

- Definitely yes
- Probably yes
- Probably not
- Definitely not
- I don't know

7 17. Do people who have had coronavirus infection (or  
8 COVID-19) lose respect or status in the community?  
9

- Definitely yes
- Probably yes
- Probably not
- Definitely not
- I don't know

10  
11  
12  
13  
14  
15  
16  
17  
18  
19  
20  
21  
22  
23  
24  
25  
26  
27  
28  
29  
30  
31  
32  
33  
34  
35  
36  
37  
38  
39  
40  
41  
42  
43  
44  
45  
46  
47  
48  
49  
50  
51  
52  
53  
54  
55  
56  
57  
58  
59  
60

For peer review only

**Section 5 -Household Questions**

1  
2  
3  
4  
5  
6  
7  
8  
9  
10  
11  
12  
13  
14  
15  
16  
17  
18  
19  
20  
21  
22  
23  
24  
25  
26  
27  
28  
29  
30  
31  
32  
33  
34  
35  
36  
37  
38  
39  
40  
41  
42  
43  
44  
45  
46  
47  
48  
49  
50  
51  
52  
53  
54  
55  
56  
57  
58  
59  
60

1. Do you own a car?  Yes  
 No  
 Choose not to answer

2. Do you own a home?  Yes  
 No  
 Choose not to answer

3. Are you the parent or guardian of any child under the age of 18 living in your household?  Yes  
 No  
 Don't Know

4. Has your child's school or daycare been closed for any length of time as a result of coronavirus, or not?  Yes  
 No  
 Don't Know

5. If your child's school or daycare is/was closed for two weeks or more due to coronavirus, how difficult, if at all, has it been/would it be for you to find alternative childcare?  Very Difficult  
 Somewhat Difficult  
 Not too Difficult  
 Not at all Difficult

6. If you were required to remain at home because of quarantine or school or work closure, would you be able to do at least part of your job from home, or not?  Yes  
 No  
 Not applicable  
 Don't know

6. Please explain how you would you be able to do at least part of your job from home

\_\_\_\_\_

6. Please explain why you wouldn't be able to do at least part of your job from home

\_\_\_\_\_

7. Do you or anyone in your household work in a health care delivery setting, such as a doctor's office, clinic, hospital, nursing home, or dentist's office? (check all that apply)  Yes, me  
 Yes, someone in my household  
 No, no one  
 Don't know

8. How many children under age 18 currently live in your household?

\_\_\_\_\_

9. How many adults, age 18 and over, currently live in your household including yourself?

\_\_\_\_\_

10. Are you responsible for taking care of children?  Yes  
 No  
 Don't Know

1 11. Are you responsible for taking care of any elderly  
2 people?  
3

- Yes
- No
- Don't Know

4  
5  
6 Please tell us about your social support system  
7 (friends, family, neighbors):  
8  
9  
10  
11  
12  
13  
14  
15  
16  
17  
18  
19  
20  
21  
22  
23  
24  
25  
26  
27  
28  
29  
30  
31  
32  
33  
34  
35  
36  
37  
38  
39  
40  
41  
42  
43  
44  
45  
46  
47  
48  
49  
50  
51  
52  
53  
54  
55  
56  
57  
58  
59  
60

For peer review only

**Section 6: Stress in the past month**

|                                                                                                                      | Never                 | Almost never          | Sometimes             | Fairly often          | Very often            |
|----------------------------------------------------------------------------------------------------------------------|-----------------------|-----------------------|-----------------------|-----------------------|-----------------------|
| 1. In the last month, how often have you been upset because of something that happened unexpectedly?                 | <input type="radio"/> |
| 2. In the last month, how often have you felt that you were unable to control the important things in your life?     | <input type="radio"/> |
| 3. In the last month, how often have you felt nervous and "stressed"?                                                | <input type="radio"/> |
| 4. In the last month, how often have you felt confident about your ability to handle your personal problems?         | <input type="radio"/> |
| 5. In the last month, how often have you felt that things were going your way?                                       | <input type="radio"/> |
| 6. In the last month, how often have you found that you could not cope with all the things that you had to do?       | <input type="radio"/> |
| 7. In the last month, how often have you been able to control irritations in your life?                              | <input type="radio"/> |
| 8. In the last month, how often have you felt that you were on top of things?                                        | <input type="radio"/> |
| 9. In the last month, how often have you been angered because of things that were outside of your control?           | <input type="radio"/> |
| 10. In the last month, how often have you felt difficulties were piling up so high that you could not overcome them? | <input type="radio"/> |

11. Please tell us about your feelings of stress over the past month:

---

**Section 7 - Social support**

|                                                                         | Very Strongly Disagree | Strongly Disagree     | Mildly Disagree       | Neutral               | Mildly Agree          | Strongly Agree        | Very Strongly Agree   |
|-------------------------------------------------------------------------|------------------------|-----------------------|-----------------------|-----------------------|-----------------------|-----------------------|-----------------------|
| 1. There is a special person who is around when I am in need.           | <input type="radio"/>  | <input type="radio"/> | <input type="radio"/> | <input type="radio"/> | <input type="radio"/> | <input type="radio"/> | <input type="radio"/> |
| 2. There is a special person with whom I can share my joys and sorrows. | <input type="radio"/>  | <input type="radio"/> | <input type="radio"/> | <input type="radio"/> | <input type="radio"/> | <input type="radio"/> | <input type="radio"/> |
| 3. My family really tries to help me.                                   | <input type="radio"/>  | <input type="radio"/> | <input type="radio"/> | <input type="radio"/> | <input type="radio"/> | <input type="radio"/> | <input type="radio"/> |
| 4. I get the emotional help and support I need from my family.          | <input type="radio"/>  | <input type="radio"/> | <input type="radio"/> | <input type="radio"/> | <input type="radio"/> | <input type="radio"/> | <input type="radio"/> |
| 5. I have a special person who is a real source of comfort to me.       | <input type="radio"/>  | <input type="radio"/> | <input type="radio"/> | <input type="radio"/> | <input type="radio"/> | <input type="radio"/> | <input type="radio"/> |
| 6. My friends really try to help me.                                    | <input type="radio"/>  | <input type="radio"/> | <input type="radio"/> | <input type="radio"/> | <input type="radio"/> | <input type="radio"/> | <input type="radio"/> |
| 7. I can count on my friends when things go wrong.                      | <input type="radio"/>  | <input type="radio"/> | <input type="radio"/> | <input type="radio"/> | <input type="radio"/> | <input type="radio"/> | <input type="radio"/> |
| 8. I can talk about my problems with my family.                         | <input type="radio"/>  | <input type="radio"/> | <input type="radio"/> | <input type="radio"/> | <input type="radio"/> | <input type="radio"/> | <input type="radio"/> |
| 9. I have friends with whom I can share my joys and sorrows.            | <input type="radio"/>  | <input type="radio"/> | <input type="radio"/> | <input type="radio"/> | <input type="radio"/> | <input type="radio"/> | <input type="radio"/> |
| 10. There is a special person in my life who cares about my feelings.   | <input type="radio"/>  | <input type="radio"/> | <input type="radio"/> | <input type="radio"/> | <input type="radio"/> | <input type="radio"/> | <input type="radio"/> |
| 11. My family is willing to help me make decisions.                     | <input type="radio"/>  | <input type="radio"/> | <input type="radio"/> | <input type="radio"/> | <input type="radio"/> | <input type="radio"/> | <input type="radio"/> |
| 12. I can talk about my problems with my friends.                       | <input type="radio"/>  | <input type="radio"/> | <input type="radio"/> | <input type="radio"/> | <input type="radio"/> | <input type="radio"/> | <input type="radio"/> |

**Section 8: Health Questions**

1. Would you say in general your health is

- Excellent  
 Very good  
 Good  
 Fair  
 Poor

2. Now thinking about your physical health, which includes physical illness and injury, for how many days during the past 30 days was your physical health not good?

\_\_\_\_\_ (number of days)

3. Now thinking about your mental health, which includes stress, depression, and problems with emotions, for how many days during the past 30 days was your mental health not good?

\_\_\_\_\_ (number of days)

4. During the past 30 days, for about how many days did poor physical or mental health keep you from doing your usual activities, such as self-care, work, or recreation?

\_\_\_\_\_ (number of days)

5. Was there a time in the past 12 months when you needed to get health care (for example, see a doctor) but could not because of cost?

- Yes  
 No  
 Don't Know

6. Do you or does someone in your household have a serious health condition such as high blood pressure, heart disease, lung disease, cancer, or diabetes? (check all that apply)

- Yes, I do  
 Yes, someone else in my household does  
 No, no one does  
 I don't know

7. Which of the following apply to you (check all that apply):

- I am currently pregnant  
 My partner is currently pregnant  
 Neither my partner nor I are currently pregnant

8. Would you like to become pregnant or have a child in the next year?

- Yes  
 No  
 Don't Know



**Section 9: Social Media**

**1. Which of the following social media platforms do you use? (Check best response for each)**

|              | use daily             | a few times per week  | a few times per month | rarely use            | never use             |
|--------------|-----------------------|-----------------------|-----------------------|-----------------------|-----------------------|
| a. Facebook  | <input type="radio"/> |
| b. Twitter   | <input type="radio"/> |
| c. LinkedIn  | <input type="radio"/> |
| d. Instagram | <input type="radio"/> |
| e. WhatsApp  | <input type="radio"/> |
| f. Snapchat  | <input type="radio"/> |
| g. Reddit    | <input type="radio"/> |

2. How has your social media use changed since the coronavirus pandemic started?

Use social media a lot more  
 Use social media a bit more  
 Don't use social media more at all  
 Don't know

2b. Please explain how your social media use has changed since the coronavirus pandemic started:

\_\_\_\_\_

**Section 10: Demographic Questions**

1. What is your current age, in years?

\_\_\_\_\_

2. How would you describe your ethnic background?

\_\_\_\_\_

4. Do you consider yourself any of the following?  
(check all that apply)

- Mexican  
 Puerto Rican  
 Cuban

4a. If you consider yourself part of another  
Hispanic/Latinx ethnicity other than those listed  
above, please describe:

\_\_\_\_\_

4b. I do not consider myself Hispanic or Latinx

- True  
 False

5. What best describes your education?

- Did not complete high school  
 Completed secondary education, high school, or GED  
 Attended university/college but did not complete it  
 Graduated from university/college  
 Degree beyond university/college (MA, PhD, MD,  
etc.)

6. What is your present religion, if any? Check all that apply

|                                    | Yes                   | No                    | Choose not to answer  |
|------------------------------------|-----------------------|-----------------------|-----------------------|
| a. Christian                       | <input type="radio"/> | <input type="radio"/> | <input type="radio"/> |
| b. Jewish (Judaism)                | <input type="radio"/> | <input type="radio"/> | <input type="radio"/> |
| c. Muslim                          | <input type="radio"/> | <input type="radio"/> | <input type="radio"/> |
| d. Buddhist                        | <input type="radio"/> | <input type="radio"/> | <input type="radio"/> |
| e. Hindu                           | <input type="radio"/> | <input type="radio"/> | <input type="radio"/> |
| f. Atheist (do not believe in God) | <input type="radio"/> | <input type="radio"/> | <input type="radio"/> |
| g. Other                           | <input type="radio"/> | <input type="radio"/> | <input type="radio"/> |
| h. Don't Know                      | <input type="radio"/> | <input type="radio"/> | <input type="radio"/> |

6g. Other Religion, please specify

\_\_\_\_\_

7. If you live in the USA, please identify race/ethnicity (check all that apply)

- American Indian or Alaskan
- Asian
- Black or African American
- Native Hawaiian
- Pacific Islander
- Caucasian
- Other

7. You selected other, please specify other race/ethnicity

\_\_\_\_\_

7. Which of the following categories do you identify as?

- Hearing/non-deaf
- Hard of hearing
- deaf
- Deaf
- DeafBlind

For the purposes of this study, please use the following definitions.

Hearing/non-deaf: Person with no hearing loss;  
 Hard of hearing: Person with some hearing loss;  
 deaf: Person that has hearing loss;  
 Deaf: Person that has hearing loss and identifies with Deaf culture;  
 DeafBlind: Person with a combination of hearing loss and limited-to-no vision.

9. Which of the following best describes your gender:

- Male
- Female
- Other option

q9. You selected other option to describe your gender, please explain:

\_\_\_\_\_

10. Do you think of yourself as (check all that apply):

- Straight
- Gay
- Lesbian
- Bisexual
- Transgender
- Not listed above

1 10a. Not listed above, please state  
2  
3  
4  
5  
6  
7  
8  
9  
10  
11  
12  
13  
14  
15  
16  
17  
18  
19  
20  
21  
22  
23  
24  
25  
26  
27  
28  
29  
30  
31  
32  
33  
34  
35  
36  
37  
38  
39  
40  
41  
42  
43  
44  
45  
46  
47  
48  
49  
50  
51  
52  
53  
54  
55  
56  
57  
58  
59  
60

For peer review only

1 **Section 11: Final Question**  
2  
3  
4

5  
6 1. Please share any additional thoughts about  
7 coronavirus and COVID-19 that you might have:  
8 \_\_\_\_\_  
9  
10  
11  
12  
13  
14  
15  
16  
17  
18  
19  
20  
21  
22  
23  
24  
25  
26  
27  
28  
29  
30  
31  
32  
33  
34  
35  
36  
37  
38  
39  
40  
41  
42  
43  
44  
45  
46  
47  
48  
49  
50  
51  
52  
53  
54  
55  
56  
57  
58  
59  
60

For peer review only

**Section 12: Survey Quality**

**We would now like to ask you a few questions about this survey to improve it in the future. If you have specific questions you would like to point out please copy and paste the question in the text field.**

1. In general, the questions in this survey were "understandable." That is, you did not have to read the item more than once to understand what it was asking.

Strongly Disagree  
 Disagree  
 Neither disagree nor agree  
 Agree  
 Strongly agree

2. Were there any specific questions that were particularly difficult to understand? If yes, please specify (as best you can)

\_\_\_\_\_

3. In general, the meaning of the questions were clear and straightforward

Strongly Disagree  
 Disagree  
 Neither disagree nor agree  
 Agree  
 Strongly agree

4. Were there any specific questions that the meaning was unclear? If yes, please specify (as best you can)

Yes  No

4a. If yes, please specify (as best you can)

\_\_\_\_\_

5. The scales used to answer the questions were adequate. That is, do you feel the scale provided you with an appropriate way to respond?

Strongly Disagree  
 Disagree  
 Neither disagree nor agree  
 Agree  
 Strongly agree

6. In your opinion, were any of the questions written in such a way that there was ONLY one OBVIOUS answer for you?

Yes  
 No

6b. Please explain:

\_\_\_\_\_

Any other comments you wish to make about this study

( )

For more information about coronavirus and COVID-19, please visit

<https://www.cdc.gov/coronavirus/2019-ncov/index.html>

<https://www.cdc.gov/>

<https://www.who.int/>

# Encuesta global sobre coronavirus

1  
2 ¡Bienvenido! Lo invitamos a participar en una encuesta epidemiológica global de la Universidad de Rochester para  
3 ayudarnos a comprender mejor las actitudes, creencias y conocimientos sobre temas relacionados con asuntos de  
4 salud pública, como el coronavirus, COVID-19, y otras enfermedades infecciosas, y los factores que podrían estar  
5 relacionados con ellos. Si tiene 18 años o más y puede responder a la encuesta en español, ¡siga leyendo!  
6  
7

---

8 LANGUAGE \_\_\_\_\_  
9  
10  
11  
12  
13  
14  
15  
16  
17  
18  
19  
20  
21  
22  
23  
24  
25  
26  
27  
28  
29  
30  
31  
32  
33  
34  
35  
36  
37  
38  
39  
40  
41  
42  
43  
44  
45  
46  
47  
48  
49  
50  
51  
52  
53  
54  
55  
56  
57  
58  
59  
60

For peer review only

SCHOOL OF MEDICINE AND DENTISTRY

Department of Obstetrics & Gynecology



**Encuesta global sobre coronavirus: Investigador Principal de opiniones y prácticas: Timothy Dye, PhD y Eva Pressman, MD**

Este formulario describe un estudio de investigación que está llevando adelante el profesorado de la Universidad de Rochester, Facultad de Medicina y Odontología.

El objeto de este estudio es comprender mejor las actitudes, creencias y conocimientos sobre algunos temas relacionados con asuntos de salud pública, como el coronavirus y otras enfermedades infecciosas, y los factores que podrían estar relacionados con ellos. El estudio incluye preguntas acerca de sus pensamientos y experiencias con respecto al coronavirus y COVID-19, salud física y mental, estrés y apoyo social, así como también preguntas demográficas. Puede saltar todas las preguntas que quiera.

Si decide participar en este estudio, le pediremos que complete una encuesta mediante un enlace al que puede acceder por internet. Completar la encuesta le llevará aproximadamente entre 20 y 40 minutos. Estimamos que aproximadamente 7000 personas participarán en este estudio.

Los riesgos de participación son mínimos. Algunas de las preguntas podrían molestarlo o ponerlo incómodo. Puede saltar cualquier pregunta que no quiera responder. Para proteger la confidencialidad de los datos, los datos serán transmitidos en un formato encriptado (legible solamente para el personal autorizado). No se esperan beneficios de esta encuesta.

No recibirá compensación por participar en esta encuesta.

La Universidad de Rochester hace todo lo posible por mantener la información obtenida de usted confidencial. Los resultados de la investigación se pueden presentar en reuniones o en publicaciones, y no identificarán a personas específicas que respondieron.

**Su participación en este estudio es completamente voluntaria.** No está obligado a participar y puede dejar de completar la encuesta en cualquier momento. Si decide detenerse, no podemos eliminar su información, dado que no recopilamos ningún tipo de información que lo identifique, y no podríamos encontrar y eliminar su registro.

Para más información, o si tiene preguntas sobre esta investigación, puede comunicarse con el Dr. Timothy Dye, por correo electrónico a [tim\\_dye@urmc.rochester.edu](mailto:tim_dye@urmc.rochester.edu).

La Universidad de Rochester está recibiendo un pago de la Fundación Mae Stone Goode por realizar este estudio de investigación.

Por favor, comuníquese con University of Rochester Research Subjects Review Board en 265 Crittenden Blvd., CU 420315, Rochester, NY 14642, Teléfono +1 (585) 276-0005 o +1 (877) 449-4441 por las siguientes razones:

- Desea hablar con alguien que no sea el personal de investigación acerca de sus derechos como sujeto de investigación;
- Para expresar preocupaciones con respecto a la investigación.

RSRB STUDY00004825  
Version Date: April 28, 2020

RSRB Approval Date: 4/28/2020



1 Information  
2 Sheet  
3  
4  
5

6 Encuesta global sobre coronavirus: Investigador Principal de opiniones y prácticas: Timothy Dye, PhD y Eva  
7 Pressman, MD  
8  
9

10  
11 Este formulario describe un estudio de investigación que está llevando adelante el profesorado de la Universidad de  
12 Rochester, Facultad de Medicina y Odontología.  
13  
14

15 El objeto de este estudio es comprender mejor las actitudes, creencias y conocimientos sobre algunos temas  
16 relacionados con asuntos de salud pública, como el coronavirus y otras enfermedades infecciosas, y los factores que  
17 podrían estar relacionados con ellos. El estudio incluye preguntas acerca de sus pensamientos y experiencias con  
18 respecto al coronavirus y COVID-19, salud física y mental, estrés y apoyo social, así como también preguntas  
19 demográficas. Puede saltar todas las preguntas que quiera.  
20  
21  
22

23 Si decide participar en este estudio, le pediremos que complete una encuesta mediante un enlace al que puede  
24 acceder por internet. Completar la encuesta le llevará aproximadamente entre 15 y 25 minutos. Estimamos que  
25 aproximadamente 7000 personas participarán en este estudio.  
26  
27  
28

29 Los riesgos de participación son mínimos. Algunas de las preguntas podrían molestarlo o ponerlo incómodo. Puede  
30 saltar cualquier pregunta que no quiera responder. Para proteger la confidencialidad de los datos, los datos serán  
31 transmitidos en un formato encriptado (legible solamente para el personal autorizado). No se esperan beneficios de  
32 esta encuesta.  
33  
34

35 No recibirá compensación por participar en esta encuesta.  
36  
37  
38

39 La Universidad de Rochester hace todo lo posible por mantener la información obtenida de usted confidencial. Los  
40 resultados de la investigación se pueden presentar en reuniones o en publicaciones, y no identificarán a personas  
41 específicas que respondieron.  
42  
43  
44

45 Su participación en este estudio es completamente voluntaria. No está obligado a participar y puede dejar de  
46 completar la encuesta en cualquier momento. Si decide detenerse, no podemos eliminar su información, dado que  
47 no recopilamos ningún tipo de información que lo identifique, y no podríamos encontrar y eliminar su registro.  
48  
49

50 Para más información, o si tiene preguntas sobre esta investigación, puede comunicarse con el Dr. Timothy Dye, por  
51 correo electrónico a [tim\\_dye@urmc.rochester.edu](mailto:tim_dye@urmc.rochester.edu).  
52  
53  
54

55 La Universidad de Rochester está recibiendo un pago de la Fundación Mae Stone Goode por realizar este estudio de  
56 investigación.  
57  
58  
59

60 Por favor, comuníquese con University of Rochester Research Subjects Review Board en 265 Crittenden Blvd., CU  
420315, Rochester, NY 14642, Teléfono +1 (585) 276-0005 o +1 (877) 449-4441 por las siguientes razones:

1 Para expresar preocupaciones con respecto a la investigación.  
2 \_\_\_\_\_  
3  
4 \_\_\_\_\_  
5 \_\_\_\_\_

6 ¿Continuar con la encuesta?

- 7  Sí  
8  No  
9  
10  
11  
12  
13  
14  
15  
16  
17  
18  
19  
20  
21  
22  
23  
24  
25  
26  
27  
28  
29  
30  
31  
32  
33  
34  
35  
36  
37  
38  
39  
40  
41  
42  
43  
44  
45  
46  
47  
48  
49  
50  
51  
52  
53  
54  
55  
56  
57  
58  
59  
60

For peer review only

1 **Sección 1: Preguntas sobre país**  
2  
3  
4  
5  
6  
7  
8  
9  
10  
11  
12  
13  
14  
15  
16  
17  
18  
19  
20  
21  
22  
23  
24  
25  
26  
27  
28  
29  
30  
31  
32  
33  
34  
35  
36  
37  
38  
39  
40  
41  
42  
43  
44  
45  
46  
47  
48  
49  
50  
51  
52  
53  
54  
55  
56  
57  
58  
59  
60

For peer review only

1 1. ¿En qué país vive?  
2  
3  
4  
5  
6  
7  
8  
9  
10  
11  
12  
13  
14  
15  
16  
17  
18  
19  
20  
21  
22  
23  
24  
25  
26  
27  
28  
29  
30  
31  
32  
33  
34  
35  
36  
37  
38  
39  
40  
41  
42  
43  
44  
45  
46  
47  
48  
49  
50  
51  
52  
53  
54  
55  
56  
57  
58  
59  
60

- Afganistán
- Albania
- Alemania
- Andorra
- Angola
- Anguila
- Antártida [a]
- Antigua y Barbuda
- Arabia Saudita
- Argelia
- Argentina
- Armenia
- Aruba
- Australia [b]
- Austria
- Azerbaiyán
- Bahamas (el)
- Bahrein
- Bangladesh
- Barbados
- Bélgica
- Belice
- Benin
- Bielorrusia
- Bolivia (Estado Plurinacional de)
- Bonaire
- Bosnia y Herzegovina
- Botsuana
- Brasil
- Brunei Darussalam [e]
- Bulgaria
- Burkina Faso
- Burundi
- Bután
- Cabo Verde [f]
- Camboya
- Camerún
- Canadá
- Chad
- Chequia [i]
- Chile
- China
- Chipre
- Colombia
- Comoras (las)
- Congo (el) [g]
- Congo (la República Democrática del)
- Corea (la República de) [p]
- Corea (la República Popular Democrática de) [o]
- Costa de Marfil [h]
- Costa Rica
- Croacia
- Cuba
- Curagao
- Dinamarca
- Djibouti
- Dominica
- Ecuador
- Egipto
- El Salvador
- Emiratos Árabes Unidos (el)
- Eritrea
- Eslovaquia
- Eslovenia
- España
- Estados Unidos de América (el)
- Estonia
- Eswatini [j]
- Etiopía

1  
2  
3  
4  
5  
6  
7  
8  
9  
10  
11  
12  
13  
14  
15  
16  
17  
18  
19  
20  
21  
22  
23  
24  
25  
26  
27  
28  
29  
30  
31  
32  
33  
34  
35  
36  
37  
38  
39  
40  
41  
42  
43  
44  
45  
46  
47  
48  
49  
50  
51  
52  
53  
54  
55  
56  
57  
58  
59  
60

- Federación de Rusia (la) [v]
- Fiji
- Filipinas (el)
- Finlandia
- Francia [l]
- Gabón
- Gambia (el)
- Georgia
- Georgia del Sur y las Islas Sandwich del Sur
- Ghana
- Gibraltar
- Granada
- Grecia
- Groenlandia
- Guadalupe
- Guam
- Guatemala
- Guayana
- Guayana Francesa
- Guernsey
- Guinea
- Guinea Ecuatorial
- Guinea-Bissau
- Honduras
- Hong Kong
- Hungría
- India
- Indonesia
- Irak
- Irán (República Islámica de)
- Irlanda
- isla Ascencion
- Isla Bouvet
- Isla de Navidad
- Isla del hombre
- Isla Norfolk
- Islandia
- Islas Aland
- islas Bermudas
- Islas Caimán (las)
- Islas Cocos (Keeling) (las)
- Islas Cook (las)
- Islas Feroe (las)
- Islas Heard y McDonald
- Islas Malvinas (las) [Malvinas] [k]
- Islas Marianas del Norte (las)
- Islas Marshall (las)
- Islas Salomón
- Islas Turcas y Caicos (la)
- Islas ultramarinas menores de Estados Unidos (the) [ac]
- Islas Vírgenes (EE, UU,) [Ag]
- Islas Vírgenes Británicas [af]
- Israel
- Italia
- Jamaica
- Jan Mayen
- Japan
- Jersey
- Jordán
- Katar
- Kazajstán
- Kenia
- Kirguistán
- Kiribati
- Kuwait
- Lesoto
- Letonia
- Líbano
- Liberia
- Libia

1  
2  
3  
4  
5  
6  
7  
8  
9  
10  
11  
12  
13  
14  
15  
16  
17  
18  
19  
20  
21  
22  
23  
24  
25  
26  
27  
28  
29  
30  
31  
32  
33  
34  
35  
36  
37  
38  
39  
40  
41  
42  
43  
44  
45  
46  
47  
48  
49  
50  
51  
52  
53  
54  
55  
56  
57  
58  
59  
60

- Liechtenstein
- Lituania
- Luxemburgo
- Macao [r]
- Macedonia del norte [s]
- Madagascar
- Malasia
- Malawi
- Maldivas
- Mali
- Malta
- Marruecos
- Martinica
- Mauricio
- Mauritania
- Mayotte
- México
- Micronesia (Estados Federados de)
- Moldavia (la República de)
- Mónaco
- Mongolia
- Montenegro
- Montserrat
- Mozambique
- Myanmar [t]
- Namibia
- Nauru
- Nepal
- Nicaragua
- Níger (el)
- Nigeria
- Niue
- Noruega
- Nueva Caledonia
- Nueva Zelanda
- Omán
- Países Bajos (el)
- Pakistán
- Palau
- Palestina, Estado de
- Panamá
- Papúa Nueva Guinea
- Paraguay
- Perú
- Pitcairn [u]
- Polinesia francés
- Polonia
- Portugal
- Puerto Rico
- Reino Unido de Gran Bretaña e Irlanda del Norte (el)
- República Árabe Siria (la) [x]
- República Centroafricana (la)
- República Democrática Popular Lao (la) [q]
- República Dominicana (la)
- Reunión
- Ruanda
- Rumania
- Saba
- Sáhara Occidental [ah]
- Samoa
- Samoa Americana
- San Bartolomé
- San Cristóbal y Nieves
- San Eustaquio
- San Marino
- San Martín (parte francesa)
- San Pedro y Miquelón
- San Vicente y las Granadinas
- Santa Helena
- Santa Lucía

1  
2  
3  
4  
5  
6  
7  
8  
9  
10  
11  
12  
13  
14  
15  
16  
17  
18  
19  
20  
21  
22  
23  
24  
25  
26  
27  
28  
29  
30  
31  
32  
33  
34  
35  
36  
37  
38  
39  
40  
41  
42  
43  
44  
45  
46  
47  
48  
49  
50  
51  
52  
53  
54  
55  
56  
57  
58  
59  
60

- Santa Sede (la) [n]
- Santo Tomé y Príncipe
- Senegal
- Serbia
- Seychelles
- Sierra Leona
- Singapur
- Sint Maarten (parte holandesa)
- Somalia
- Sri Lanka
- Sudáfrica
- Sudán (el)
- Sudán del Sur
- Suecia
- Suiza
- Surinam
- Svalbard
- Tailandia
- Taiwán (Provincia de China) [y]
- Tanzania, la República Unida de
- Tayikistán
- Territorio Británico del Océano Índico (el)
- Territorios Australes Franceses (el) [m]
- Timor-Leste [aa]
- Togo
- Tokelau
- Tonga
- Trinidad y Tobago
- Tristan da Cunha
- Túnez
- Turkmenistán
- Turquía
- Tuvalu
- Ucrania
- Uganda
- Uruguay
- Uzbekistán
- Vanuatu
- Venezuela (República Bolivariana de)
- Vietnam [ae]
- Wallis y Futuna
- Yemen
- Zambia
- Zimbabue
- Otro

---

Vive en otro país, especifica:

---

1 1b. Si es residente de Estados Unidos, ¿en qué  
2 Estado vive?  
3

- 4  Alabama
- 5  Alaska
- 6  Arizona
- 7  Arkansas
- 8  California
- 9  Colorado
- 10  Connecticut
- 11  Delaware
- 12  Florida
- 13  Georgia
- 14  Hawaii
- 15  Idaho
- 16  Illinois
- 17  Indiana
- 18  Iowa
- 19  Kansas
- 20  Kentucky
- 21  Louisiana
- 22  Maine
- 23  Maryland
- 24  Massachusetts
- 25  Michigan
- 26  Minnesota
- 27  Mississippi
- 28  Missouri
- 29  Montana
- 30  Nebraska
- 31  Nevada
- 32  New Hampshire
- 33  New Jersey
- 34  New Mexico
- 35  New York
- 36  North Carolina
- 37  North Dakota
- 38  Ohio
- 39  Oklahoma
- 40  Oregon
- 41  Pennsylvania
- 42  Rhode Island
- 43  South Carolina
- 44  South Dakota
- 45  Tennessee
- 46  Texas
- 47  Utah
- 48  Vermont
- 49  Virginia
- 50  Washington
- 51  West Virginia
- 52  Wisconsin
- 53  Wyoming



1c. Si es residente de la India, ¿en qué Estado vive?

- IN-AP = Andhra Pradesh
- IN-AR = Arunachal Pradesh
- IN-AS = Assam
- IN-BR = Bihar
- IN-CT = Chhattisgarh
- IN-GA = Goa
- IN-GJ = Gujarat
- IN-HR = Haryana
- IN-HP = Himachal Pradesh
- IN-JH = Jharkhand
- IN-KA = Karnataka
- IN-KL = Kerala
- IN-MP = Madhya Pradesh
- IN-MH = Maharashtra
- IN-MN = Manipur
- IN-ML = Meghalaya
- IN-MZ = Mizoram
- IN-NL = Nagaland
- IN-OR = Odisha
- IN-PB = Punjab
- IN-RJ = Rajasthan
- IN-SK = Sikkim
- IN-TN = Tamil Nadu
- IN-TG = Telangana
- IN-TR = Tripura
- IN-UT = Uttarakhand
- IN-UP = Uttar Pradesh
- IN-WB = West Bengal
- IN-AN = Andaman and Nicobar Islands
- IN-CH = Chandigarh
- IN-DN = Dadra and Nagar Haveli
- IN-DD = Daman and Diu
- IN-DL = Delhi
- IN-JK = Jammu and Kashmir
- IN-LA = Ladakh
- IN-LD = Lakshadweep
- IN-PY = Puducherry

For peer review only

1 2. ¿En qué país nació?  
2  
3  
4  
5  
6  
7  
8  
9  
10  
11  
12  
13  
14  
15  
16  
17  
18  
19  
20  
21  
22  
23  
24  
25  
26  
27  
28  
29  
30  
31  
32  
33  
34  
35  
36  
37  
38  
39  
40  
41  
42  
43  
44  
45  
46  
47  
48  
49  
50  
51  
52  
53  
54  
55  
56  
57  
58  
59  
60

- Afganistán
- Albania
- Alemania
- Andorra
- Angola
- Anguila
- Antártida [a]
- Antigua y Barbuda
- Arabia Saudita
- Argelia
- Argentina
- Armenia
- Aruba
- Australia [b]
- Austria
- Azerbaiyán
- Bahamas (el)
- Bahrein
- Bangladesh
- Barbados
- Bélgica
- Belice
- Benin
- Bielorrusia
- Bolivia (Estado Plurinacional de)
- Bonaire
- Bosnia y Herzegovina
- Botsuana
- Brasil
- Brunei Darussalam [e]
- Bulgaria
- Burkina Faso
- Burundi
- Bután
- Cabo Verde [f]
- Camboya
- Camerún
- Canadá
- Chad
- Chequia [i]
- Chile
- China
- Chipre
- Colombia
- Comoras (las)
- Congo (el) [g]
- Congo (la República Democrática del)
- Corea (la República de) [p]
- Corea (la República Popular Democrática de) [o]
- Costa de Marfil [h]
- Costa Rica
- Croacia
- Cuba
- Curagao
- Dinamarca
- Djibouti
- Dominica
- Ecuador
- Egipto
- El Salvador
- Emiratos Árabes Unidos (el)
- Eritrea
- Eslovaquia
- Eslovenia
- España
- Estados Unidos de América (el)
- Estonia
- Eswatini [j]
- Etiopía

1  
2  
3  
4  
5  
6  
7  
8  
9  
10  
11  
12  
13  
14  
15  
16  
17  
18  
19  
20  
21  
22  
23  
24  
25  
26  
27  
28  
29  
30  
31  
32  
33  
34  
35  
36  
37  
38  
39  
40  
41  
42  
43  
44  
45  
46  
47  
48  
49  
50  
51  
52  
53  
54  
55  
56  
57  
58  
59  
60

- Federación de Rusia (la) [v]
- Fiji
- Filipinas (el)
- Finlandia
- Francia [l]
- Gabón
- Gambia (el)
- Georgia
- Georgia del Sur y las Islas Sandwich del Sur
- Ghana
- Gibraltar
- Granada
- Grecia
- Groenlandia
- Guadalupe
- Guam
- Guatemala
- Guayana
- Guayana Francesa
- Guernsey
- Guinea
- Guinea Ecuatorial
- Guinea-Bissau
- Honduras
- Hong Kong
- Hungría
- India
- Indonesia
- Irak
- Irán (República Islámica de)
- Irlanda
- isla Ascencion
- Isla Bouvet
- Isla de Navidad
- Isla del hombre
- Isla Norfolk
- Islandia
- Islas Aland
- islas Bermudas
- Islas Caimán (las)
- Islas Cocos (Keeling) (las)
- Islas Cook (las)
- Islas Feroe (las)
- Islas Heard y McDonald
- Islas Malvinas (las) [Malvinas] [k]
- Islas Marianas del Norte (las)
- Islas Marshall (las)
- Islas Salomón
- Islas Turcas y Caicos (la)
- Islas ultramarinas menores de Estados Unidos (the) [ac]
- Islas Vírgenes (EE, UU,) [Ag]
- Islas Vírgenes Británicas [af]
- Israel
- Italia
- Jamaica
- Jan Mayen
- Japan
- Jersey
- Jordán
- Katar
- Kazajstán
- Kenia
- Kirguistán
- Kiribati
- Kuwait
- Lesoto
- Letonia
- Líbano
- Liberia
- Libia

1  
2  
3  
4  
5  
6  
7  
8  
9  
10  
11  
12  
13  
14  
15  
16  
17  
18  
19  
20  
21  
22  
23  
24  
25  
26  
27  
28  
29  
30  
31  
32  
33  
34  
35  
36  
37  
38  
39  
40  
41  
42  
43  
44  
45  
46  
47  
48  
49  
50  
51  
52  
53  
54  
55  
56  
57  
58  
59  
60

- Liechtenstein
- Lituania
- Luxemburgo
- Macao [r]
- Macedonia del norte [s]
- Madagascar
- Malasia
- Malawi
- Maldivas
- Mali
- Malta
- Marruecos
- Martinica
- Mauricio
- Mauritania
- Mayotte
- México
- Micronesia (Estados Federados de)
- Moldavia (la República de)
- Mónaco
- Mongolia
- Montenegro
- Montserrat
- Mozambique
- Myanmar [t]
- Namibia
- Nauru
- Nepal
- Nicaragua
- Níger (el)
- Nigeria
- Niue
- Noruega
- Nueva Caledonia
- Nueva Zelanda
- Omán
- Países Bajos (el)
- Pakistán
- Palau
- Palestina, Estado de
- Panamá
- Papúa Nueva Guinea
- Paraguay
- Perú
- Pitcairn [u]
- Polinesia francés
- Polonia
- Portugal
- Puerto Rico
- Reino Unido de Gran Bretaña e Irlanda del Norte (el)
- República Árabe Siria (la) [x]
- República Centroafricana (la)
- República Democrática Popular Lao (la) [q]
- República Dominicana (la)
- Reunión
- Ruanda
- Rumania
- Saba
- Sáhara Occidental [ah]
- Samoa
- Samoa Americana
- San Bartolomé
- San Cristóbal y Nieves
- San Eustaquio
- San Marino
- San Martín (parte francesa)
- San Pedro y Miquelón
- San Vicente y las Granadinas
- Santa Helena
- Santa Lucía

1  
2  
3  
4  
5  
6  
7  
8  
9  
10  
11  
12  
13  
14  
15  
16  
17  
18  
19  
20  
21  
22  
23  
24  
25  
26  
27  
28  
29  
30  
31  
32  
33  
34  
35  
36  
37  
38  
39  
40  
41  
42  
43  
44  
45  
46  
47  
48  
49  
50  
51  
52  
53  
54  
55  
56  
57  
58  
59  
60

- Santa Sede (la) [n]
- Santo Tomé y Príncipe
- Senegal
- Serbia
- Seychelles
- Sierra Leona
- Singapur
- Sint Maarten (parte holandesa)
- Somalia
- Sri Lanka
- Sudáfrica
- Sudán (el)
- Sudán del Sur
- Suecia
- Suiza
- Surinam
- Svalbard
- Tailandia
- Taiwán (Provincia de China) [y]
- Tanzania, la República Unida de
- Tayikistán
- Territorio Británico del Océano Índico (el)
- Territorios Australes Franceses (el) [m]
- Timor-Leste [aa]
- Togo
- Tokelau
- Tonga
- Trinidad y Tobago
- Tristan da Cunha
- Túnez
- Turkmenistán
- Turquía
- Tuvalu
- Ucrania
- Uganda
- Uruguay
- Uzbekistán
- Vanuatu
- Venezuela (República Bolivariana de)
- Vietnam [ae]
- Wallis y Futuna
- Yemen
- Zambia
- Zimbabue
- Otro

---

Nació en otro país, especifique:

---

## Sección 2: Actitudes relativas a la salud

**Cada uno de los siguientes puntos es una afirmación acerca de su salud. Puede estar de acuerdo o desacuerdo con ella. Es una medición de sus creencias personales; no hay respuestas correctas o incorrectas. Díganos cuán de acuerdo o cuán en desacuerdo está con cada punto.**

|                                                                                                             | Muy en<br>desacuerdo  | En desacuerdo         | Ni de acuerdo ni<br>en desacuerdo | De acuerdo            | Muy de acuerdo        |
|-------------------------------------------------------------------------------------------------------------|-----------------------|-----------------------|-----------------------------------|-----------------------|-----------------------|
| 1. Si me enfermo, es mi propio comportamiento lo que determina cuán pronto mejoro.                          | <input type="radio"/> | <input type="radio"/> | <input type="radio"/>             | <input type="radio"/> | <input type="radio"/> |
| 2. No importa qué haga, si me tengo que enfermar, me voy a enfermar.                                        | <input type="radio"/> | <input type="radio"/> | <input type="radio"/>             | <input type="radio"/> | <input type="radio"/> |
| 3. La mejor manera de evitar enfermarme es teniendo contacto regular con mi médico.                         | <input type="radio"/> | <input type="radio"/> | <input type="radio"/>             | <input type="radio"/> | <input type="radio"/> |
| 4. La mayoría de las cosas que afectan mi salud me suceden por accidente.                                   | <input type="radio"/> | <input type="radio"/> | <input type="radio"/>             | <input type="radio"/> | <input type="radio"/> |
| 5. Cuando no me siento bien, debo hablar con un profesional médico capacitado.                              | <input type="radio"/> | <input type="radio"/> | <input type="radio"/>             | <input type="radio"/> | <input type="radio"/> |
| 6. Estoy en control de mi salud.                                                                            | <input type="radio"/> | <input type="radio"/> | <input type="radio"/>             | <input type="radio"/> | <input type="radio"/> |
| 7. Mi familia tiene mucho que ver con si me enfermo o estoy saludable                                       | <input type="radio"/> | <input type="radio"/> | <input type="radio"/>             | <input type="radio"/> | <input type="radio"/> |
| 8. Cuando me enfermo, el culpable soy yo.                                                                   | <input type="radio"/> | <input type="radio"/> | <input type="radio"/>             | <input type="radio"/> | <input type="radio"/> |
| 9. La suerte juega un papel importante a la hora de determinar cuán rápido me recuperaré de una enfermedad. | <input type="radio"/> | <input type="radio"/> | <input type="radio"/>             | <input type="radio"/> | <input type="radio"/> |
| 10. Los profesionales de la salud controlan mi salud.                                                       | <input type="radio"/> | <input type="radio"/> | <input type="radio"/>             | <input type="radio"/> | <input type="radio"/> |
| 11. Mi buena salud se debe en gran parte a la buena suerte.                                                 | <input type="radio"/> | <input type="radio"/> | <input type="radio"/>             | <input type="radio"/> | <input type="radio"/> |
| 12. Lo principal que afecta mi salud es lo que yo, personalmente, hago                                      | <input type="radio"/> | <input type="radio"/> | <input type="radio"/>             | <input type="radio"/> | <input type="radio"/> |

- |    |                                                                                                                                                                   |                       |                       |                       |                       |                       |
|----|-------------------------------------------------------------------------------------------------------------------------------------------------------------------|-----------------------|-----------------------|-----------------------|-----------------------|-----------------------|
| 1  | 13. Si me cuido, puedo evitar enfermarme.                                                                                                                         | <input type="radio"/> |
| 2  |                                                                                                                                                                   |                       |                       |                       |                       |                       |
| 3  | 14. Cuando me recupero de una enfermedad, en general es porque otras personas (por ejemplo, médicos, enfermeros, familiares, amigos) me han estado cuidando bien. | <input type="radio"/> |
| 4  |                                                                                                                                                                   |                       |                       |                       |                       |                       |
| 5  |                                                                                                                                                                   |                       |                       |                       |                       |                       |
| 6  |                                                                                                                                                                   |                       |                       |                       |                       |                       |
| 7  |                                                                                                                                                                   |                       |                       |                       |                       |                       |
| 8  |                                                                                                                                                                   |                       |                       |                       |                       |                       |
| 9  |                                                                                                                                                                   |                       |                       |                       |                       |                       |
| 10 |                                                                                                                                                                   |                       |                       |                       |                       |                       |
| 11 | 15. No importa qué haga, es probable que me enferme.                                                                                                              | <input type="radio"/> |
| 12 |                                                                                                                                                                   |                       |                       |                       |                       |                       |
| 13 |                                                                                                                                                                   |                       |                       |                       |                       |                       |
| 14 | 16. Si tiene que ser, estaré saludable.                                                                                                                           | <input type="radio"/> |
| 15 |                                                                                                                                                                   |                       |                       |                       |                       |                       |
| 16 |                                                                                                                                                                   |                       |                       |                       |                       |                       |
| 17 | 17. Si tomo las acciones correctas, me puedo mantener saludable.                                                                                                  | <input type="radio"/> |
| 18 |                                                                                                                                                                   |                       |                       |                       |                       |                       |
| 19 |                                                                                                                                                                   |                       |                       |                       |                       |                       |
| 20 | 18. Con respecto a mi salud, solo puedo hacer lo que mi médico me dice que haga.                                                                                  | <input type="radio"/> |
| 21 |                                                                                                                                                                   |                       |                       |                       |                       |                       |
| 22 |                                                                                                                                                                   |                       |                       |                       |                       |                       |
| 23 |                                                                                                                                                                   |                       |                       |                       |                       |                       |
| 24 |                                                                                                                                                                   |                       |                       |                       |                       |                       |
| 25 |                                                                                                                                                                   |                       |                       |                       |                       |                       |
| 26 |                                                                                                                                                                   |                       |                       |                       |                       |                       |
| 27 |                                                                                                                                                                   |                       |                       |                       |                       |                       |
| 28 |                                                                                                                                                                   |                       |                       |                       |                       |                       |
| 29 |                                                                                                                                                                   |                       |                       |                       |                       |                       |
| 30 |                                                                                                                                                                   |                       |                       |                       |                       |                       |
| 31 |                                                                                                                                                                   |                       |                       |                       |                       |                       |
| 32 |                                                                                                                                                                   |                       |                       |                       |                       |                       |
| 33 |                                                                                                                                                                   |                       |                       |                       |                       |                       |
| 34 |                                                                                                                                                                   |                       |                       |                       |                       |                       |
| 35 |                                                                                                                                                                   |                       |                       |                       |                       |                       |
| 36 |                                                                                                                                                                   |                       |                       |                       |                       |                       |
| 37 |                                                                                                                                                                   |                       |                       |                       |                       |                       |
| 38 |                                                                                                                                                                   |                       |                       |                       |                       |                       |
| 39 |                                                                                                                                                                   |                       |                       |                       |                       |                       |
| 40 |                                                                                                                                                                   |                       |                       |                       |                       |                       |
| 41 |                                                                                                                                                                   |                       |                       |                       |                       |                       |
| 42 |                                                                                                                                                                   |                       |                       |                       |                       |                       |
| 43 |                                                                                                                                                                   |                       |                       |                       |                       |                       |
| 44 |                                                                                                                                                                   |                       |                       |                       |                       |                       |
| 45 |                                                                                                                                                                   |                       |                       |                       |                       |                       |
| 46 |                                                                                                                                                                   |                       |                       |                       |                       |                       |
| 47 |                                                                                                                                                                   |                       |                       |                       |                       |                       |
| 48 |                                                                                                                                                                   |                       |                       |                       |                       |                       |
| 49 |                                                                                                                                                                   |                       |                       |                       |                       |                       |
| 50 |                                                                                                                                                                   |                       |                       |                       |                       |                       |
| 51 |                                                                                                                                                                   |                       |                       |                       |                       |                       |
| 52 |                                                                                                                                                                   |                       |                       |                       |                       |                       |
| 53 |                                                                                                                                                                   |                       |                       |                       |                       |                       |
| 54 |                                                                                                                                                                   |                       |                       |                       |                       |                       |
| 55 |                                                                                                                                                                   |                       |                       |                       |                       |                       |
| 56 |                                                                                                                                                                   |                       |                       |                       |                       |                       |
| 57 |                                                                                                                                                                   |                       |                       |                       |                       |                       |
| 58 |                                                                                                                                                                   |                       |                       |                       |                       |                       |
| 59 |                                                                                                                                                                   |                       |                       |                       |                       |                       |
| 60 |                                                                                                                                                                   |                       |                       |                       |                       |                       |

For peer review only

**Sección 3 - Creencias con respecto al coronavirus****1. Según sus conocimientos, ¿los expertos de salud pública han recomendado estas acciones como una manera de ayudar a detener la propagación del coronavirus?**

|                                                            | Sí, recomendado       | No, no se recomienda  | No sabe               |
|------------------------------------------------------------|-----------------------|-----------------------|-----------------------|
| a. Lavado de manos frecuente                               | <input type="radio"/> | <input type="radio"/> | <input type="radio"/> |
| b. Hervir agua antes de beberla                            | <input type="radio"/> | <input type="radio"/> | <input type="radio"/> |
| c. Que las personas saludables usen mascarillas en público | <input type="radio"/> | <input type="radio"/> | <input type="radio"/> |
| d. Evitar reuniones con muchas personas                    | <input type="radio"/> | <input type="radio"/> | <input type="radio"/> |
| e. Usar repelente para mosquitos                           | <input type="radio"/> | <input type="radio"/> | <input type="radio"/> |
| f. Quedarse en casa si se siente enfermo                   | <input type="radio"/> | <input type="radio"/> | <input type="radio"/> |

g. Otras recomendaciones

---



**2. Según sus conocimientos, ¿cuáles de las siguientes son maneras en las que se transmite o propaga el coronavirus?**

|                                                                                                       | Sí, se transmite de esta manera | No, no se transmite de esta manera | No sabe               |
|-------------------------------------------------------------------------------------------------------|---------------------------------|------------------------------------|-----------------------|
| a. Estar en proximidad física cercana con alguien infectado                                           | <input type="radio"/>           | <input type="radio"/>              | <input type="radio"/> |
| b. Tocar superficies que contienen pequeñas cantidades de fluidos corporales de una persona infectada | <input type="radio"/>           | <input type="radio"/>              | <input type="radio"/> |
| c. A través de picaduras de mosquito                                                                  | <input type="radio"/>           | <input type="radio"/>              | <input type="radio"/> |
| d. Por los genes/la genética                                                                          | <input type="radio"/>           | <input type="radio"/>              | <input type="radio"/> |

e. ¿De qué otra manera se contagia o propaga el coronavirus? Por favor, explique

---

For peer review only

**3. Para cada una de las siguientes, díganos si cree que es un síntoma común de infección con coronavirus (COVID-19)**

|                                 | Sí, es un síntoma     | No, no es un síntoma  | No sabe               |
|---------------------------------|-----------------------|-----------------------|-----------------------|
| a. Fiebre                       | <input type="radio"/> | <input type="radio"/> | <input type="radio"/> |
| b. Tos seca                     | <input type="radio"/> | <input type="radio"/> | <input type="radio"/> |
| c. Vómitos                      | <input type="radio"/> | <input type="radio"/> | <input type="radio"/> |
| d. Congestión nasal/goteo nasal | <input type="radio"/> | <input type="radio"/> | <input type="radio"/> |
| e. Sarpullido                   | <input type="radio"/> | <input type="radio"/> | <input type="radio"/> |

f. Otros síntomas (describir, por favor):

---

For peer review only

**4. ¿Cree que alguno de los siguientes grupos tiene un riesgo más alto de desarrollar problemas médicos graves si se infecta con coronavirus?**

|                                               | Sí, mayor riesgo      | No, no corre mayor riesgo | No sabe               |
|-----------------------------------------------|-----------------------|---------------------------|-----------------------|
| a. Niños                                      | <input type="radio"/> | <input type="radio"/>     | <input type="radio"/> |
| b. Mujeres embarazadas                        | <input type="radio"/> | <input type="radio"/>     | <input type="radio"/> |
| c. Personas con condiciones de salud crónicas | <input type="radio"/> | <input type="radio"/>     | <input type="radio"/> |
| d. Personas de entre 20 y 29 años             | <input type="radio"/> | <input type="radio"/>     | <input type="radio"/> |
| e. Personas con obesidad                      | <input type="radio"/> | <input type="radio"/>     | <input type="radio"/> |
| f. Personas mayores de 60 años                | <input type="radio"/> | <input type="radio"/>     | <input type="radio"/> |

5. Hasta donde usted sabe, ¿hay una vacuna para proteger a las personas del coronavirus actual, también conocido como COVID-19?

Sí  No  No sabe

6. Hasta donde usted sabe, ¿la vacuna contra la gripe, o la gripe estacional, protege a las personas del coronavirus actual, también conocido como COVID-19?

Sí  No  No sabe

7. Hasta donde usted sabe, si alguien cree que tiene síntomas de coronavirus, ¿qué debe hacer?

Quedarse en casa y llamar al médico o proveedor médico

Buscar atención médica de inmediato en una sala de emergencias o centro de cuidado de emergencia

Otra cosa

No sabe

7a. Otra cosa, por favor explique

---

**Sección 4 - Cuestiones de salud y experiencia**

1. ¿Siente que no tiene suficiente información sobre cómo protegerse usted y a su familia del coronavirus?  Sí  No  No sabe

2. ¿Qué hace, si hace algo, para protegerse usted y a su familia del coronavirus?

3. ¿Cree que la preocupación o el estrés en relación con el coronavirus han tenido un impacto negativo en su salud mental?  Sí- impacto importante  Sí - impacto menor  No  No sabe

3b. Por favor, explique:

For peer review only

**q4. ¿Qué tan efectivo cree que fue cada uno de los siguientes grupos en tomar medidas en contra del coronavirus y COVID-19?**

- a. El sistema de salud médica (incluyendo hospitales, clínicas, médicos, enfermeros y otros proveedores de la salud)
- Para nada eficaz
  - No muy eficaz
  - Algo eficaz
  - Muy eficaz

a. Por favor, explique:

---

- b. La ciencia (incluyendo investigadores y analistas)
- Para nada eficaz
  - No muy eficaz
  - Algo eficaz
  - Muy eficaz

b. Por favor, explique:

---

- c. El gobierno (incluyendo el gobierno local y nacional)
- Para nada eficaz
  - No muy eficaz
  - Algo eficaz
  - Muy eficaz

c. Por favor, explique:

---

- d. El sistema educativo (incluyendo escuelas primarias, escuelas secundarias y universidades)
- Para nada eficaz
  - No muy eficaz
  - Algo eficaz
  - Muy eficaz

d. Por favor, explique:

---

- e. Tiendas y servicios locales (incluyendo almacenes, supermercados, restaurantes)
- Para nada eficaz
  - No muy eficaz
  - Algo eficaz
  - Muy eficaz

e. Por favor, explique:

---

- f. La industria (incluyendo grandes empleadores, fábricas, fabricantes)
- Para nada eficaz
  - No muy eficaz
  - Algo eficaz
  - Muy eficaz

f. Por favor, explique:

---

1  
2  
3  
4  
5  
6  
7  
8  
9  
10  
11  
12  
13  
14  
15  
16  
17  
18  
19  
20  
21  
22  
23  
24  
25  
26  
27  
28  
29  
30  
31  
32  
33  
34  
35  
36  
37  
38  
39  
40  
41  
42  
43  
44  
45  
46  
47  
48  
49  
50  
51  
52  
53  
54  
55  
56  
57  
58  
59  
60

---

g. La prensa (incluyendo periodistas, periódicos, televisión y medios visuales)

- Para nada eficaz
- No muy eficaz
- Algo eficaz
- Muy eficaz

---

g. Por favor, explique:

---

---

h. Plataformas de redes sociales

- Para nada eficaz
- No muy eficaz
- Algo eficaz
- Muy eficaz

---

h. Por favor, explique:

---

For peer review only

**5. ¿Qué tan preocupado está, si es que lo está, sobre cada uno de los siguientes puntos?**

|                                                                                                                           | Muy preocupado        | Algo preocupado       | No Muy preocupado     | Para nada preocupado  | No sabe               |
|---------------------------------------------------------------------------------------------------------------------------|-----------------------|-----------------------|-----------------------|-----------------------|-----------------------|
| a. Usted o alguien en su familia contraerán el coronavirus                                                                | <input type="radio"/> |
| b. Perderá ingresos debido al cierre de su lugar de trabajo o debido a la reducción de horas a causa del coronavirus      | <input type="radio"/> |
| c. Contraer la Enfermedad de Lyme                                                                                         | <input type="radio"/> |
| d. Sus inversiones como los ahorros para el retiro o la universidad se verán afectadas por el coronavirus                 | <input type="radio"/> |
| e. Contraer dengue                                                                                                        | <input type="radio"/> |
| f. Se pondrá en riesgo de exposición al coronavirus porque no puede darse el lujo de quedarse en casa y faltar al trabajo | <input type="radio"/> |
| g. No podrá pagar las pruebas o el tratamiento para el coronavirus si lo necesita                                         | <input type="radio"/> |

h. Le preocupa otra cosa, por favor, explique

\_\_\_\_\_

5b. ¿Cuánto ha cambiado su vida, si cambió algo, debido al brote de coronavirus?

- Mucho
- Algo
- Solo un poco
- Para nada
- No sabe

5b. Por favor, explique, ¿cuánto ha cambiado su vida, si cambió algo, debido al brote de coronavirus?

\_\_\_\_\_

**6. Por favor, cuéntenos si ha tomado algunas de las siguientes medidas debido al reciente brote de coronavirus.**

|                                                                                                     | Sí                    | No                    | No sabe               |
|-----------------------------------------------------------------------------------------------------|-----------------------|-----------------------|-----------------------|
| a. Decidió no viajar o cambiar los planes de viaje                                                  | <input type="radio"/> | <input type="radio"/> | <input type="radio"/> |
| b. Compró o usó una mascarilla de protección                                                        | <input type="radio"/> | <input type="radio"/> | <input type="radio"/> |
| c. Se abasteció de artículos como alimentos y suministros para el hogar                             | <input type="radio"/> | <input type="radio"/> | <input type="radio"/> |
| d. Pospuso o canceló visitas de atención médica                                                     | <input type="radio"/> | <input type="radio"/> | <input type="radio"/> |
| e. Obtuvo recargas adicionales para los medicamentos recetados                                      | <input type="radio"/> | <input type="radio"/> | <input type="radio"/> |
| f. Se quedó en casa en lugar de ir a trabajar, a la escuela o a otras actividades regulares         | <input type="radio"/> | <input type="radio"/> | <input type="radio"/> |
| g. Pospuso o canceló un procedimiento médico o cirugía                                              | <input type="radio"/> | <input type="radio"/> | <input type="radio"/> |
| h. Canceló planes para asistir a reuniones con muchas personas como conciertos o eventos deportivos | <input type="radio"/> | <input type="radio"/> | <input type="radio"/> |
| i. Renunció a su trabajo                                                                            | <input type="radio"/> | <input type="radio"/> | <input type="radio"/> |

6b. Por favor, comparta cualquier explicación o detalle con respecto a los puntos de arriba:

---



**7. ¿Ha experimentado cualquiera de los siguientes puntos debido al coronavirus?**

7a. Perdió ingresos del trabajo o negocio

- Sí  
 No  
 No sabe

a. Perdió ingresos del trabajo o negocio; por favor, explique

\_\_\_\_\_

7b. No pudo comprar alimentos

- Sí  
 No  
 No sabe

b. No pudo comprar alimentos; por favor, explique

\_\_\_\_\_

7c. No pudo comprar suministros de limpieza o desinfectante para manos

- Sí  
 No  
 No sabe

7c. No pudo comprar suministros de limpieza o desinfectante para manos; por favor, explique

\_\_\_\_\_

7d. No pudo obtener medicamentos recetados

- Sí  
 No  
 No sabe

d. No pudo obtener medicamentos recetados; por favor, explique

\_\_\_\_\_

7e. ¿Usted o un miembro de la familia han sido víctimas de acoso, hostigamiento o fueron ofendidos debido al coronavirus?

- Sí  
 No  
 No sabe

7e. Han sido víctimas de acoso, hostigamiento o fueron ofendidos debido al coronavirus; por favor, explique

\_\_\_\_\_

8. ¿Qué tan estrictamente cumple con el distanciamiento social o físico, es decir, se queda en su casa, alejado siempre que pueda, o mantiene la distancia entre usted y las otras personas cuando está en un lugar público?

- Muy estrictamente  
 Algo estrictamente  
 No muy estrictamente  
 Para nada estrictamente

Por favor, cuéntenos más sobre sus pensamientos y experiencias con respecto al distanciamiento social o físico: (abierto)

\_\_\_\_\_

9. ¿Fue evaluado personalmente para detectar el coronavirus?

- Sí, me han evaluado  
 No, no me han evaluado  
 No sabe

---

1 9a. Entre los evaluados: ¿cuál fue el resultado de  
2 la prueba para detectar el coronavirus?  
3  
4  La prueba fue positiva  
 La prueba fue negativa  
 Aún no sabe

---

5 10. Entre los que no fueron evaluados: ¿Ha intentado  
6 ser evaluado para detectar el coronavirus, o no?  
7  
8  Sí  
 No  
 No sabe

---

9 11. Entre los que no fueron evaluados: ¿Cree que  
10 podría obtener una prueba para detectar el  
11 coronavirus si cree que la necesita, o no?  
12  
13  Sí  
 No  
 No sabe

---

14 11. Por favor, explique si cree que podría obtener  
15 una prueba para detectar el coronavirus si cree que la  
16 necesita.  
17 \_\_\_\_\_

---

18 11. Por favor, explique por qué no cree que podría  
19 obtener una prueba para detectar el coronavirus si  
20 cree que la necesita.  
21 \_\_\_\_\_

---

22 12. ¿Cree que tiene, o ha tenido recientemente,  
23 infección por coronavirus?  
24  
25  Sí  
 No  
 No sabe

---

26 Por favor, explique por qué cree que tiene, o ha  
27 tenido recientemente, infección del coronavirus  
28  
29 \_\_\_\_\_

---

30 13. Si hubiera una vacuna para evitar que las personas  
31 contraigan coronavirus, ¿se pondría la vacuna?  
32  
33  Sí  
 No  
 No sabe

---

34 Por favor, explique ¿por qué se pondría la vacuna  
35 si hubiese una disponible?  
36  
37 \_\_\_\_\_

---

38 Por favor, explique ¿por qué no se daría la vacuna  
39 si hubiese una disponible  
40  
41 \_\_\_\_\_

---

42 Por favor, explique ¿por qué no sabe si daría la  
43 vacuna si hubiese una disponible  
44  
45 \_\_\_\_\_

---

46 14. ¿Conoce personalmente a alguien que tenga la  
47 infección del coronavirus (o COVID-19)? Marque todas  
48 las que correspondan  
49  
50  Sí, un miembro de la familia  
 Sí, un amigo  
 Sí, un vecino  
 Sí, otra persona  
51  
52  No  
53  No sé

---

54 15. ¿Conoce personalmente a alguien que haya  
55 fallecido debido a la infección del coronavirus (o  
56 COVID-19)? Marque todas las que correspondan  
57  
58  Sí, un miembro de la familia  
 Sí, un amigo  
 Sí, un vecino  
 Sí, otra persona  
59  
60  No  
 No sé

1 16. ¿Las personas hablan mal o chismean sobre otras  
2 personas con las que viven, que han tenido o se cree  
3 que tienen la infección del coronavirus (o COVID-19)?  
4

- Definitivamente sí
- Probablemente sí
- Probablemente no
- Definitivamente no
- No sé

7 17. ¿Las personas que han tenido la infección del  
8 coronavirus (o COVID-19) pierden el respeto o el  
9 estatus en la comunidad?  
10

- Definitivamente sí
- Probablemente sí
- Probablemente no
- Definitivamente no
- No sé

For peer review only

**Sección 5 - Preguntas domésticas**

1. ¿Es dueño de un automóvil?

- Sí  
 No  
 Elijo no responder

2. ¿Es dueño de una vivienda?

- Sí  
 No  
 Elijo no responder

3. ¿Es padre o tutor de un niño menor de 18 años que vive en su vivienda?

- Sí  
 No  
 No sabe

4. ¿La escuela o guardería de su hijo ha cerrado por un período de tiempo como resultado del coronavirus?

- Sí  
 No  
 No sabe

5. Si la escuela o guardería de su hijo está/estaba cerrada por dos semanas o más debido al coronavirus, ¿qué tan difícil ha sido/sería para usted hasta encontrar un cuidado infantil alternativo?

- Muy difícil  
 Algo difícil  
 No muy difícil  
 Para nada difícil

6. Si se viera obligado a quedarse en su casa, ¿podría hacer, al menos, una parte de su trabajo desde su casa?

- Sí  
 No  
 No aplica  
 No sabe

6. Por favor, explique cómo podría hacer, al menos, una parte de su trabajo desde su casa

\_\_\_\_\_

6. Por favor, explique por qué no podría hacer, al menos, una parte de su trabajo desde su casa

\_\_\_\_\_

7. ¿Usted o alguien en su vivienda trabajan en un entorno de atención de la salud, como un consultorio médico, clínica, hospital, hogar para personas mayores o consultorio odontológico? (marque todas las que correspondan)

- Sí, yo  
 Sí, alguien en mi vivienda  
 No, nadie  
 No sabe

8. ¿Cuántos niños menores de 18 años viven actualmente en su vivienda?

\_\_\_\_\_

9. ¿Cuánto adultos, de 18 años o más, viven actualmente en su vivienda, incluido usted?

\_\_\_\_\_

10. ¿Es responsable del cuidado de los niños?

- Sí  
 No  
 No sabe

1  
2  
3  
4  
5  
6  
7  
8  
9  
10  
11  
12  
13  
14  
15  
16  
17  
18  
19  
20  
21  
22  
23  
24  
25  
26  
27  
28  
29  
30  
31  
32  
33  
34  
35  
36  
37  
38  
39  
40  
41  
42  
43  
44  
45  
46  
47  
48  
49  
50  
51  
52  
53  
54  
55  
56  
57  
58  
59  
60

---

11. ¿Es responsable del cuidado de personas mayores?

- Sí
- No
- No sabe

---

Por favor, cuéntenos sobre su sistema de apoyo social  
(amigos, familia, vecinos):

---

For peer review only

**Sección 6: Estrés en el último mes**

|                                                                                                                       | Nunca                 | Casi nunca            | A veces               | Con bastante frecuencia | Muy a menudo          |
|-----------------------------------------------------------------------------------------------------------------------|-----------------------|-----------------------|-----------------------|-------------------------|-----------------------|
| 1. En el último mes, ¿con qué frecuencia se molestó por algo que sucedió inesperadamente?                             | <input type="radio"/> | <input type="radio"/> | <input type="radio"/> | <input type="radio"/>   | <input type="radio"/> |
| 2. En el último mes, ¿con qué frecuencia sintió que no podía controlar las cosas importantes en su vida?              | <input type="radio"/> | <input type="radio"/> | <input type="radio"/> | <input type="radio"/>   | <input type="radio"/> |
| 3. En el último mes, ¿con qué frecuencia se sintió nervioso y "estresado"?                                            | <input type="radio"/> | <input type="radio"/> | <input type="radio"/> | <input type="radio"/>   | <input type="radio"/> |
| 4. En el último mes, ¿con qué frecuencia se sintió confiado sobre su habilidad para manejar sus problemas personales? | <input type="radio"/> | <input type="radio"/> | <input type="radio"/> | <input type="radio"/>   | <input type="radio"/> |
| 5. En el último mes, ¿con qué frecuencia sintió que las cosas le iban bien?                                           | <input type="radio"/> | <input type="radio"/> | <input type="radio"/> | <input type="radio"/>   | <input type="radio"/> |
| 6. En el último mes, ¿con qué frecuencia se dio cuenta que no podía lidiar con todas las cosas que debía hacer?       | <input type="radio"/> | <input type="radio"/> | <input type="radio"/> | <input type="radio"/>   | <input type="radio"/> |
| 7. En el último mes, ¿con qué frecuencia ha podido controlar las irritaciones en su vida?                             | <input type="radio"/> | <input type="radio"/> | <input type="radio"/> | <input type="radio"/>   | <input type="radio"/> |
| 8. En el último mes, ¿con qué frecuencia sintió que tenía control sobre las cosas?                                    | <input type="radio"/> | <input type="radio"/> | <input type="radio"/> | <input type="radio"/>   | <input type="radio"/> |
| 9. En el último mes, ¿con qué frecuencia se enojó por cosas que estaban fuera de su control?                          | <input type="radio"/> | <input type="radio"/> | <input type="radio"/> | <input type="radio"/>   | <input type="radio"/> |
| 10. En el último mes, ¿con qué frecuencia sintió que las dificultades se acumulaban y no podía superarlas?            | <input type="radio"/> | <input type="radio"/> | <input type="radio"/> | <input type="radio"/>   | <input type="radio"/> |

11. Por favor, cuéntenos sobre sus sentimientos de estrés en el último mes:

---

**Sección 7 - Apoyo social**

|                                                                                 | Muy fuertement e en desacuerdo | Muy en desacuerdo     | Algo en desacuerdo    | Neutral               | Algo de acuerdo       | Muy de acuerdo        | Muy fuertement e en acuerdo |
|---------------------------------------------------------------------------------|--------------------------------|-----------------------|-----------------------|-----------------------|-----------------------|-----------------------|-----------------------------|
| 1. Hay una persona especial que está conmigo cuando lo necesito.                | <input type="radio"/>          | <input type="radio"/> | <input type="radio"/> | <input type="radio"/> | <input type="radio"/> | <input type="radio"/> | <input type="radio"/>       |
| 2. Hay una persona especial con quien puedo compartir mis alegrías y tristezas. | <input type="radio"/>          | <input type="radio"/> | <input type="radio"/> | <input type="radio"/> | <input type="radio"/> | <input type="radio"/> | <input type="radio"/>       |
| 3. Mi familia realmente trata de ayudarme.                                      | <input type="radio"/>          | <input type="radio"/> | <input type="radio"/> | <input type="radio"/> | <input type="radio"/> | <input type="radio"/> | <input type="radio"/>       |
| 4. Recibo la ayuda y el apoyo emocional que necesito de mi familia.             | <input type="radio"/>          | <input type="radio"/> | <input type="radio"/> | <input type="radio"/> | <input type="radio"/> | <input type="radio"/> | <input type="radio"/>       |
| 5. Tengo una persona especial que es una verdadera fuente de alivio para mí.    | <input type="radio"/>          | <input type="radio"/> | <input type="radio"/> | <input type="radio"/> | <input type="radio"/> | <input type="radio"/> | <input type="radio"/>       |
| 6. Mi familia realmente trata de ayudarme.                                      | <input type="radio"/>          | <input type="radio"/> | <input type="radio"/> | <input type="radio"/> | <input type="radio"/> | <input type="radio"/> | <input type="radio"/>       |
| 7. Puedo contar con mis amigos cuando las cosas salen mal.                      | <input type="radio"/>          | <input type="radio"/> | <input type="radio"/> | <input type="radio"/> | <input type="radio"/> | <input type="radio"/> | <input type="radio"/>       |
| 8. Puedo hablar sobre mis problemas con mi familia.                             | <input type="radio"/>          | <input type="radio"/> | <input type="radio"/> | <input type="radio"/> | <input type="radio"/> | <input type="radio"/> | <input type="radio"/>       |
| 9. Tengo amigos con quienes puedo compartir mis alegrías y tristezas.           | <input type="radio"/>          | <input type="radio"/> | <input type="radio"/> | <input type="radio"/> | <input type="radio"/> | <input type="radio"/> | <input type="radio"/>       |
| 10. Hay una persona especial en mi vida que se preocupa por mis sentimientos.   | <input type="radio"/>          | <input type="radio"/> | <input type="radio"/> | <input type="radio"/> | <input type="radio"/> | <input type="radio"/> | <input type="radio"/>       |
| 11. Mi familia está dispuesta a ayudarme a tomar decisiones.                    | <input type="radio"/>          | <input type="radio"/> | <input type="radio"/> | <input type="radio"/> | <input type="radio"/> | <input type="radio"/> | <input type="radio"/>       |
| 12. Puedo hablar sobre mis problemas con mis amigos.                            | <input type="radio"/>          | <input type="radio"/> | <input type="radio"/> | <input type="radio"/> | <input type="radio"/> | <input type="radio"/> | <input type="radio"/>       |

**Sección 8: Preguntas sobre la salud**

1. ¿Diría usted que, en general, su capacidad de sanar es...?

- Excelente  
 Muy buena  
 Buena  
 Regular  
 Mala

2. Ahora, con respecto a su salud física, lo que incluye enfermedad y lesión física, ¿cuántos días, en los últimos 30 días, no tuvo una buena salud física?

\_\_\_\_\_  
((cantidad de días))

3. Ahora, con respecto a su salud mental, lo que incluye estrés, depresión y problemas emocionales, ¿cuántos días, en los últimos 30 días, no tuvo una buena salud mental?

\_\_\_\_\_  
((cantidad de días))

4. En los últimos 30 días, ¿aproximadamente cuántos días su mala salud física o mental le impidió realizar sus actividades normales, como cuidar de sí mismo, trabajar o actividades recreativas?

\_\_\_\_\_  
((cantidad de días))

5. ¿Hubo algún momento en los últimos 12 meses que necesitó recibir atención médica (por ejemplo, ver a un médico), pero no pudo hacerlo debido al costo?

- Sí  
 No  
 No sabe

6. ¿Usted o alguien en su vivienda tienen una condición de salud grave como presión arterial alta, enfermedad cardíaca, enfermedad pulmonar, cáncer o diabetes? (marque todas las que correspondan)

- Sí, yo  
 Sí, alguien en mi vivienda  
 No, nadie  
 No sabe

7. ¿Cuál de las siguientes opciones aplican a usted (marque todas las que correspondan)?

- Actualmente estoy embarazada  
 Mi pareja actualmente está embarazada  
 Ni mi pareja ni yo estamos actualmente embarazados

8. ¿Le gustaría quedar embarazada o tener un hijo en el próximo año?

- Sí  
 No  
 No sabe



**Sección 9: Redes sociales**

**1. ¿Cuáles de las siguientes redes sociales usa? (Marque la mejor respuesta para cada una)**

|              | La uso todos los días | Algunas veces por semana | Algunas veces por mes | La uso muy poco       | No la uso nunca       |
|--------------|-----------------------|--------------------------|-----------------------|-----------------------|-----------------------|
| a. Facebook  | <input type="radio"/> | <input type="radio"/>    | <input type="radio"/> | <input type="radio"/> | <input type="radio"/> |
| b. Twitter   | <input type="radio"/> | <input type="radio"/>    | <input type="radio"/> | <input type="radio"/> | <input type="radio"/> |
| c. LinkedIn  | <input type="radio"/> | <input type="radio"/>    | <input type="radio"/> | <input type="radio"/> | <input type="radio"/> |
| d. Instagram | <input type="radio"/> | <input type="radio"/>    | <input type="radio"/> | <input type="radio"/> | <input type="radio"/> |
| e. WhatsApp  | <input type="radio"/> | <input type="radio"/>    | <input type="radio"/> | <input type="radio"/> | <input type="radio"/> |
| f. Snapchat  | <input type="radio"/> | <input type="radio"/>    | <input type="radio"/> | <input type="radio"/> | <input type="radio"/> |
| g. Reddit    | <input type="radio"/> | <input type="radio"/>    | <input type="radio"/> | <input type="radio"/> | <input type="radio"/> |

2. ¿Cómo ha cambiado su uso de redes sociales desde que comenzó la pandemia por coronavirus?

- Uso las redes sociales mucho más
- Uso las redes sociales un poco más
- No uso las redes sociales más que antes
- No sabe

2b. Por favor, explique cómo ha cambiado su uso de redes sociales desde que comenzó la pandemia por coronavirus:

---

**Sección 10: Preguntas demográficas**

1. ¿Cuál es su edad actual, en años?

---

2. ¿Cómo describiría su trasfondo étnico?

---

4. ¿Se considera alguno de los siguientes? (marque todas las que correspondan) Mexicano Puertorriqueño Cubano

- Mexicano  
 Puertorriqueño  
 Cubano

4a. Si se considera parte de otra etnia hispana/latina que no mencionamos arriba, por favor describa:

---

4b. No me considero hispano o latino

- Verdadero  
 Falso

5. ¿Cuál de las siguientes opciones mejor describe su educación?

- No completó la secundaria  
 Completó la educación secundaria o el GED  
 Fue a la universidad pero no la completó  
 Se recibió de la universidad  
 Título de postgrado (MA, PhD, MD, etc.)

**6. ¿Cuál es su religión actual, si es religioso? Marque todas las que correspondan**

|                           | Sí                    | No                    | Prefiero no contestar |
|---------------------------|-----------------------|-----------------------|-----------------------|
| a. Cristiano              | <input type="radio"/> | <input type="radio"/> | <input type="radio"/> |
| b. Judío (judaísmo)       | <input type="radio"/> | <input type="radio"/> | <input type="radio"/> |
| c. Musulmán               | <input type="radio"/> | <input type="radio"/> | <input type="radio"/> |
| d. Budista                | <input type="radio"/> | <input type="radio"/> | <input type="radio"/> |
| e. Hindú                  | <input type="radio"/> | <input type="radio"/> | <input type="radio"/> |
| f. Ateo (no cree en Dios) | <input type="radio"/> | <input type="radio"/> | <input type="radio"/> |
| g. Otro                   | <input type="radio"/> | <input type="radio"/> | <input type="radio"/> |
| h. No sabe                | <input type="radio"/> | <input type="radio"/> | <input type="radio"/> |

6g. Otra religión, especifique

\_\_\_\_\_

7. Si vive en Estados Unidos, identifique su raza/etnia (marque todas las que correspondan)

- Nativo americano o nativo de Alaska
- Asiático
- Negro o afroamericano
- Nativo de Hawái
- Nativo de las Islas del Pacífico
- Caucásico
- Otro

7. Seleccione "otro", por favor especifique qué otra raza/etnia

\_\_\_\_\_

7. ¿Como cuál de las siguientes categorías se identifica?

- Oyente/no sordo
- Con problemas de audición
- sordo
- Sordo
- Sordociego

A los fines de este estudio, por favor utilice las siguientes definiciones.

Oyente/no sordo: Persona que no tiene pérdida de la audición;

Con problemas de audición: Persona que tiene una pérdida parcial

de la audición;

sordo: Persona que tiene pérdida de la audición;

Sordo: Persona que tiene pérdida de la audición y se identifica con

la cultura de los Sordos;

Sordociego: Persona con una combinación de pérdida de audición y con visión limitada o sin visión.

9. ¿Cuál de las siguientes opciones mejor describe su género?

- Masculino
- Femenino
- Otra opción

1 q9. Eligió "otra opción" para describir su género,  
2 por favor explique:  
3

4 \_\_\_\_\_

5 10. Se considera... (marque todas las que  
6 correspondan):  
7

- 8  Heterosexual
- 9  Gay
- 10  Lesbiana
- 11  Bisexual
- 12  Transgénero
- 13  No figura en la lista

14 10a. No figura en la lista, indíquelo  
15

16 \_\_\_\_\_

For peer review only

17  
18  
19  
20  
21  
22  
23  
24  
25  
26  
27  
28  
29  
30  
31  
32  
33  
34  
35  
36  
37  
38  
39  
40  
41  
42  
43  
44  
45  
46  
47  
48  
49  
50  
51  
52  
53  
54  
55  
56  
57  
58  
59  
60

1 **Sección 11: Pregunta final**  
2  
3  
4

5  
6 1. Por favor, comparta cualquier pensamiento adicional  
7 sobre el coronavirus y COVID-19 que tenga:  
8 \_\_\_\_\_  
9  
10  
11  
12  
13  
14  
15  
16  
17  
18  
19  
20  
21  
22  
23  
24  
25  
26  
27  
28  
29  
30  
31  
32  
33  
34  
35  
36  
37  
38  
39  
40  
41  
42  
43  
44  
45  
46  
47  
48  
49  
50  
51  
52  
53  
54  
55  
56  
57  
58  
59  
60

For peer review only

**Sección 12: Calidad de la encuesta**

**Ahora nos gustaría hacerle algunas preguntas sobre esta encuesta para mejorarla en el futuro. Si tiene alguna pregunta específica que le gustaría señalar, por favor, copie y pegue la pregunta en el campo de texto.**

1. En general, las preguntas en esta encuesta fueron "entendibles". Es decir, no tuvo que leer la pregunta más de una vez para entender qué se preguntaba.

Muy en desacuerdo  
 En desacuerdo  
 Ni de acuerdo ni en desacuerdo  
 De acuerdo  
 Muy de acuerdo

2. ¿Hubo alguna pregunta específica que le resultó particularmente difícil de entender? Si la respuesta es sí, por favor especifique (lo mejor que pueda)

\_\_\_\_\_

3. En general, el significado de las preguntas fue claro y directo

Muy en desacuerdo  
 En desacuerdo  
 Ni de acuerdo ni en desacuerdo  
 De acuerdo  
 Muy de acuerdo

4. ¿Hubo alguna pregunta específica cuyo significado no fue claro? Si la respuesta es sí, por favor especifique (lo mejor que pueda)

Sí  No

4a. Si la respuesta es sí, por favor especifique (lo mejor que pueda)

\_\_\_\_\_

5. Las escalas para responder las preguntas fueron apropiadas. Es decir, ¿siente que la escala le proporcionó una manera adecuada para responder?

Muy en desacuerdo  
 En desacuerdo  
 Ni de acuerdo ni en desacuerdo  
 De acuerdo  
 Muy de acuerdo

6. En su opinión, ¿alguna de las preguntas estaba escrita de tal manera que había SOLO una respuesta OBVIA para usted?

Sí  No

6b. Por favor, explique:

\_\_\_\_\_

¿Algún otro comentario que desee hacer acerca de este estudio?

\_\_\_\_\_

( )

Para más información sobre coronavirus y COVID-19, visite

<https://www.cdc.gov/coronavirus/2019-ncov/index.html>

<https://www.cdc.gov/>

<https://www.who.int/>

# Enquête mondiale sur le coronavirus

1  
2 Bienvenue ! Vous êtes invité(e) à participer à une enquête épidémiologique mondiale de l'Université de Rochester  
3 afin de nous aider à mieux comprendre les attitudes, convictions et connaissances relatives à des questions actuelles  
4 de santé publique, comme le coronavirus, le COVID-19 et d'autres maladies infectieuses, ainsi que les facteurs  
5 susceptibles d'y être liés. Si vous êtes âgé(e) d'au moins 18 ans et pouvez répondre à l'enquête en français, veuillez  
6 le faire ci-dessous !  
7

8  
9 LANGUAGE \_\_\_\_\_  
10  
11  
12  
13  
14  
15  
16  
17  
18  
19  
20  
21  
22  
23  
24  
25  
26  
27  
28  
29  
30  
31  
32  
33  
34  
35  
36  
37  
38  
39  
40  
41  
42  
43  
44  
45  
46  
47  
48  
49  
50  
51  
52  
53  
54  
55  
56  
57  
58  
59  
60

For peer review only

SCHOOL OF MEDICINE AND DENTISTRY

Department of Obstetrics & Gynecology

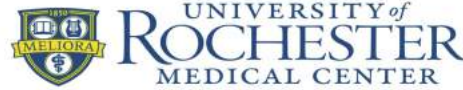

**Enquête mondiale sur le coronavirus : Opinions et pratiques**

**Enquêteurs principaux : Timothy Dye, PhD et Eva Pressman, MD**

Ce formulaire contient une étude conduite par une faculté de l'École de médecine et de dentisterie de l'Université de Rochester.

L'objectif de cette étude est de mieux comprendre les attitudes, convictions et connaissances relatives à des questions actuelles de santé publique, comme le coronavirus et d'autres maladies infectieuses, ainsi que les facteurs susceptibles d'y être liés. L'étude contient des questions relatives à vos idées et expériences en matière de coronavirus et de COVID-19, de santé physique et mentale, de stress et de soutien social, ainsi que des questions à caractère démographique. Vous pouvez passer n'importe quelle question.

Si vous décidez de participer à cette étude, il vous sera demandé de répondre à un questionnaire par le biais d'un lien disponible sur Internet. Il vous faudra entre 20 et 40 minutes pour compléter l'enquête. Nous estimons que 7 000 personnes environ participeront à cette étude.

Les risques liés à cette participation sont minimes. Certaines questions peuvent être troublantes ou embarrassantes. Vous pouvez passer les questions auxquelles vous ne voulez pas répondre. Afin de protéger la confidentialité des données, celles-ci seront transmises dans un format crypté (que seul le personnel autorisé pourra lire). Aucun bénéfice n'est escompté.

Vous ne recevrez aucune compensation pour votre participation à cette enquête.

L'Université de Rochester mettra tout en œuvre pour préserver la confidentialité de vos informations. Les résultats de la recherche pourront être présentés lors de réunions ou dans des publications, mais ne permettront pas l'identification des personnes qui y auront répondu.

**Votre participation à cette étude se fait sur base totalement volontaire.** Vous n'êtes pas tenu(e) d'y participer et pouvez interrompre le questionnaire à tout moment. Si vous décidez de l'interrompre, nous ne pourrions pas supprimer vos informations, car nous ne collectons aucune donnée d'identification et ne pourrions pas retrouver et supprimer vos réponses.

L'Université de Rochester reçoit un paiement de la Fondation Mae Stone Goode pour la réalisation de cette étude de recherche.

Si vous avez des questions concernant cette recherche, n'hésitez pas à prendre contact avec le Dr Timothy Dye par e-mail à [tim\\_dye@urmc.rochester.edu](mailto:tim_dye@urmc.rochester.edu).

N'hésitez pas à prendre contact avec le Comité de révision des sujets de recherche (Research Subjects Review Board) de l'Université de Rochester au 265 Crittenden Blvd., CU 420315, Rochester, NY 14642, téléphone +1 (585) 276-0005 ou +1 (877) 449-4441 dans les cas suivants :

- Vous désirez parler à une personne qui ne fait pas partie du personnel de recherche de vos droits en tant que sujet de recherche ;
- Vous désirez faire part de vos inquiétudes au sujet de la recherche.

RSRB STUDY00004825

Version Date: April 28, 2020

RSRB Approval Date: 4/28/2020



1 Enque  
2 ^  
3 te mondiale sur le coronavirus : Opinions et pratiques  
4  
5 Enque  
6 ^  
7 teurs principaux : Timothy Dye, PhD et Eva Pressman, MD  
8 Ce formulaire contient une  
9 e  
10 /  
11 tude conduite par une  
12 faculte  
13 /  
14 de  
15 l'E  
16 /  
17 cole de  
18 me  
19 decine et de dentisterie de  
20  
21 l'Universite  
22 /  
23 de Rochester.  
24  
25 L'objectif de cette  
26 e  
27 /  
28 tude est de mieux comprendre les attitudes, convictions et connaissances relatives  
29 a  
30 /  
31 des questions actuelles de  
32 sante  
33 /  
34 publique, comme le coronavirus et d'autres maladies infectieuses, ainsi que les facteurs susceptibles d'y  
35 e  
36 ^  
37 tre  
38 lie  
39 /  
40 s.  
41 L'e  
42 /  
43 tude contient des questions relatives  
44 a  
45 /  
46 vos  
47 ide  
48 /  
49 es et  
50 expe  
51 /  
52 riences en  
53 matie  
54 /  
55 re de coronavirus et de COVID-19, de  
56 sante  
57 /  
58 physique et mentale, de stress et de soutien social, ainsi que des questions  
59 a  
60 /  
caracte  
/  
re  
de  
/

For peer review only

Si vous  
de  
1 cidez de participer  
2 a  
3  
4 cette  
5 e  
6  
7 tude, il vous sera  
8 demande  
9  
10 de  
11 re  
12  
13 pondre  
14 a  
15 un questionnaire par le biais d'un lien disponible sur Internet. Il vous faudra entre 15 et 25 minutes pour  
16 comple  
17  
18 ter  
19 l'enque  
20  
21 te. Nous estimons que 7 000 personnes environ participeront  
22 a  
23  
24 cette  
25 e  
26  
27 tude.  
28  
29 Les risques  
30 lie  
31  
32 s  
33 a  
34 cette participation sont minimales. Certaines questions peuvent  
35 e  
36  
37 tre troublantes ou embarrassantes. Vous pouvez passer les questions auxquelles vous ne voulez pas  
38 re  
39  
40 pondre. Afin de  
41 prote  
42  
43 ger la  
44 confidentialite  
45  
46 des  
47 donne  
48  
49 es, celles-ci seront transmises dans un format  
50 crypte  
51  
52 (que seul le personnel  
53 autorite  
54  
55 pourra lire). Aucun  
56 be  
57  
58 ne  
59  
60 fice n'est  
escompte

1 cette  
2 enque  
3 te.  
4  
5 L'Universite  
6  
7 de Rochester mettra tout en œuvre pour  
8 pre  
9  
10 server la  
11 confidentialite  
12  
13 de vos informations. Les  
14 re  
15 sultats de la recherche pourront  
16 e  
17 tre  
18 pre  
19 sente  
20 s lors de  
21 re  
22 unions ou dans des publications, mais ne permettront pas l'identification des personnes qui y auront  
23 re  
24 pondu.  
25  
26 Votre participation  
27 a  
28 cette  
29 e  
30 tude se fait sur base totalement volontaire. Vous  
31 n'e  
32 tes pas tenu(e) d'y participer et pouvez interrompre le questionnaire  
33 a  
34 tout moment. Si vous  
35 de  
36 cidez de l'interrompre, nous ne pourrons pas supprimer vos informations, car nous ne collectons aucune  
37 donne  
38 e d'identification et ne pourrions pas retrouver et supprimer vos  
39 re  
40 penses.  
41  
42 L'Universite  
43 de Rochester  
44 rec  
45 oit un paiement de la Fondation Mae Stone Goode pour la  
46 re  
47 alisation de cette  
48 e  
49 tude de recherche.

1 sitez pas

2 a

3 prendre contact avec le Dr Timothy Dye par e-mail

4 a

5 tim\_dye@urmc.rochester.edu.

6 N'he

7 sitez pas

8 a

9 prendre contact avec le

10 Comite

11 de

12 re

13 vision des sujets de recherche (Research Subjects Review Board) de

14 l'Universite

15 de Rochester au 265 Crittenden Blvd., CU 420315, Rochester, NY 14642,

16 te

17 le

18 phone +1 (585) 276-0005 ou +1 (877) 449-4441 dans les cas suivants :

19 • Vous

20 de

21 sirez parler

22 a

23 une personne qui ne fait pas partie du personnel de recherche de vos droits en tant que sujet de recherche ;

24 • Vous

25 de

26 sirez faire part de vos

27 inquietudes

28 au sujet de la recherche.

29 Voulez-vous poursuivre le questionnaire ?

30  Oui

31  No

**Section 1 : Questions relatives au pays**

1  
2  
3  
4  
5  
6  
7  
8  
9  
10  
11  
12  
13  
14  
15  
16  
17  
18  
19  
20  
21  
22  
23  
24  
25  
26  
27  
28  
29  
30  
31  
32  
33  
34  
35  
36  
37  
38  
39  
40  
41  
42  
43  
44  
45  
46  
47  
48  
49  
50  
51  
52  
53  
54  
55  
56  
57  
58  
59  
60

For peer review only

1 1. Dans quel pays vivez-vous ?

- 2  Afghanistan
- 3  Afrique du Sud
- 4  Albanie
- 5  Algérie
- 6  Allemagne
- 7  Andorre
- 8  Angola
- 9  Anguilla
- 10  Antarctique [a]
- 11  Antigua-et-Barbuda
- 12  Arabie saoudite
- 13  Argentin
- 14  Arménie
- 15  Aruba
- 16  Australie [b]
- 17  Autriche
- 18  Azerbaïdjan
- 19  Bahamas (la)
- 20  Bahrain
- 21  Bangladesh
- 22  Barbade
- 23  Belgique
- 24  Belize
- 25  Bénin
- 26  Bhoutan
- 27  Biélorussie
- 28  Bolivie (État plurinational de)
- 29  Bonaire
- 30  Bosnie-herzégovine
- 31  Botswana
- 32  Brésil
- 33  Brunéi Darussalam [e]
- 34  Bulgarie
- 35  Burkina faso
- 36  Burundi
- 37  Cambodge
- 38  Cameroun
- 39  Canada
- 40  Cap-Vert [f]
- 41  Chili
- 42  Chine
- 43  Chypre
- 44  Colombie
- 45  Comores (las)
- 46  Congo (le) [g]
- 47  Congo (République démocratique du)
- 48  Corée (République de) [p]
- 49  Corée (République populaire démocratique de) [o]
- 50  Costa rica
- 51  Côte d'Ivoire [h]
- 52  Croatie
- 53  Cuba
- 54  Curaçao
- 55  Danemark
- 56  Djibouti
- 57  Dominica
- 58  Egypte
- 59  El salvador
- 60  Emirats Arabes Unis (ei)
- Equateur
- Érythrée
- Espagne
- Estonie
- Eswatini [j]
- États-Unis d'Amérique (les)
- Ethiopie
- Fédération de Russie (la) [v]
- Fidji
- Finlande

1  
2  
3  
4  
5  
6  
7  
8  
9  
10  
11  
12  
13  
14  
15  
16  
17  
18  
19  
20  
21  
22  
23  
24  
25  
26  
27  
28  
29  
30  
31  
32  
33  
34  
35  
36  
37  
38  
39  
40  
41  
42  
43  
44  
45  
46  
47  
48  
49  
50  
51  
52  
53  
54  
55  
56  
57  
58  
59  
60

- France [l]
- Gabon
- Gambie
- Géorgie
- Géorgie du Sud et îles Sandwich du Sud
- Ghana
- Gibraltar
- Grèce
- Grenade
- Groenland
- Guadalupe
- Guam
- Guatemala
- Guernsey
- Guinée
- Guinée équatoriale
- Guinée-bissau
- Guyane française
- Guyanes
- Honduras
- Hong kong
- Hongrie
- Île bouvet
- Île d'ascencion
- Ile de Man
- Île de Noël
- Île norfolk
- Îles caïmans
- Îles Cocos (Keeling) (les)
- Îles cook
- Îles d'aland
- Îles des Bermudes
- Îles Falkland (les) [Malouines] [k]
- Îles féroé
- Îles Heard et mcdonald
- Îles Mariannes du Nord
- Îles marshall
- Îles Mineures Éloignées des États-Unis (les) [ac]
- Îles salomon
- Îles Turques et Caïques (la)
- Îles Vierges (États-Unis,) [ag]
- Îles Vierges britanniques [af]
- Inde
- Indonésie
- Irak
- Iran (République islamique d ')
- Irlande
- Islande
- Israël
- Italie
- Jamaïque
- Jan mayen
- Japon
- Jersey
- Jordanie
- Kazakhstan
- Kenya
- Kiribati
- Koweït
- Kirgyzstan
- Lesotho
- Lettonie
- Liban
- Libéria
- Libye
- Liechtenstein
- Lituanie
- Luxembourg
- Macao [r]
- Macédoine du Nord [s]

1  
2  
3  
4  
5  
6  
7  
8  
9  
10  
11  
12  
13  
14  
15  
16  
17  
18  
19  
20  
21  
22  
23  
24  
25  
26  
27  
28  
29  
30  
31  
32  
33  
34  
35  
36  
37  
38  
39  
40  
41  
42  
43  
44  
45  
46  
47  
48  
49  
50  
51  
52  
53  
54  
55  
56  
57  
58  
59  
60

- Madagascar
- Malaisie
- Malawien
- Maldives
- Mali
- Malte
- Maroc
- Martinique
- Mauricio
- Mauritanie
- Mayotte
- Mexique
- Micronésie (États fédérés de)
- Moldova (République de)
- Monaco
- Mongolie
- Monténégro
- Montserrat
- Mozambique
- Myanmar [t]
- Namibie
- Nauru
- Népal
- Nicaragua
- Niger (la)
- Nigeria
- Niue
- Norvège
- Nouvelle calédonie
- Nouvelle-zélande
- Oman
- Ouganda
- Ouzbékistan
- Pakistan
- Palau
- Palestine, État de
- Panama
- Papouasie-nouvelle-guinée
- Paraguay
- Pays-Bas (la)
- Pérou
- Philippines
- Pitcairn [u]
- Pologne
- Polynésie française
- Portugal
- Puerto rico
- Qatar
- République arabe syrienne (la) [x]
- République centrafricaine
- République démocratique populaire lao (la) [q]
- République dominicaine
- République tchèque [i]
- Réunion
- Roumanie
- Royaume-Uni de Grande-Bretagne et d'Irlande du Nord (il)
- Rwanda
- Saba
- Sahara occidental [ah]
- Saint Martin (partie française)
- Saint Pierre et Miquelon
- Saint Vincent et les Grenadines
- Saint-barthélemy
- Saint-Kitts-et-Nevis
- Saint-marin
- Saint-Siège (le) [n]
- Sainte-hélène
- Sainte-Lucie
- Samoa
- Samoa américaines



1  
2  
3  
4  
5  
6  
7  
8  
9  
10  
11  
12  
13  
14  
15  
16  
17  
18  
19  
20  
21  
22  
23  
24  
25  
26  
27  
28  
29  
30  
31  
32  
33  
34  
35  
36  
37  
38  
39  
40  
41  
42  
43  
44  
45  
46  
47  
48  
49  
50  
51  
52  
53  
54  
55  
56  
57  
58  
59  
60

- Sant'Eustachio
- Sao Tomé et Príncipe
- Sénégal
- Serbie
- Seychelles
- Sierra leone
- Singapour
- Sint Maarten (partie néerlandaise)
- Slovaquie
- Slovénie
- Somalie
- Soudan
- Soudan du Sud
- Sri lanka
- Suède
- Suisse
- Suriname
- Svalbard
- Taïwan (Province de Chine) [e]
- Tadjikistan
- Tanzanie, République-Unie de
- Tchad
- Territoire britannique de l'océan Indien (el)
- Territoires français du Sud (les) [m]
- Thaïlande
- Timor oriental [aa]
- Togo
- Tokelau
- Tonga
- Trinidad et Tobago
- Tristan da Cunha
- Tunisia
- Turkmenistan
- Turquie
- Tuvalu
- Ukraine
- Uruguay
- Vanuatu
- Venezuela (République bolivarienne du)
- Vietnam [ae]
- Wallis et Futuna
- Yémen
- Zambie
- Zimbabwe
- Un autre

---

Si vous vivez dans un autre pays, veuillez préciser

---

1 1b. Pour les résidents des États-Unis, dans quel  
2 État vivez-vous ?  
3

- 4  New York
- 5  Alabama
- 6  Alaska
- 7  Arizona
- 8  Arkansas
- 9  California
- 10  Colorado
- 11  Connecticut
- 12  Delaware
- 13  Florida
- 14  Georgia
- 15  Hawaii
- 16  Idaho
- 17  Illinois
- 18  Indiana
- 19  Iowa
- 20  Kansas
- 21  Kentucky
- 22  Louisiana
- 23  Maine
- 24  Maryland
- 25  Massachusetts
- 26  Michigan
- 27  Minnesota
- 28  Mississippi
- 29  Missouri
- 30  Montana
- 31  Nebraska
- 32  Nevada
- 33  New Hampshire
- 34  New Jersey
- 35  New Mexico
- 36  North Carolina
- 37  North Dakota
- 38  Ohio
- 39  Oklahoma
- 40  Oregon
- 41  Pennsylvania
- 42  Rhode Island
- 43  South Carolina
- 44  South Dakota
- 45  Tennessee
- 46  Texas
- 47  Utah
- 48  Vermont
- 49  Virginia
- 50  Washington
- 51  West Virginia
- 52  Wisconsin
- 53  Wyoming

1c. Pour les résidents de l'Inde, dans quel État vivez-vous ?

- IN-AP = Andhra Pradesh
- IN-AR = Arunachal Pradesh
- IN-AS = Assam
- IN-BR = Bihar
- IN-CT = Chhattisgarh
- IN-GA = Goa
- IN-GJ = Gujarat
- IN-HR = Haryana
- IN-HP = Himachal Pradesh
- IN-JH = Jharkhand
- IN-KA = Karnataka
- IN-KL = Kerala
- IN-MP = Madhya Pradesh
- IN-MH = Maharashtra
- IN-MN = Manipur
- IN-ML = Meghalaya
- IN-MZ = Mizoram
- IN-NL = Nagaland
- IN-OR = Odisha
- IN-PB = Punjab
- IN-RJ = Rajasthan
- IN-SK = Sikkim
- IN-TN = Tamil Nadu
- IN-TG = Telangana
- IN-TR = Tripura
- IN-UT = Uttarakhand
- IN-UP = Uttar Pradesh
- IN-WB = West Bengal
- IN-AN = Andaman and Nicobar Islands
- IN-CH = Chandigarh
- IN-DN = Dadra and Nagar Haveli
- IN-DD = Daman and Diu
- IN-DL = Delhi
- IN-JK = Jammu and Kashmir
- IN-LA = Ladakh
- IN-LD = Lakshadweep
- IN-PY = Puducherry

For peer review only

1 2. Quel est votre pays de naissance ?

- 2  Afghanistan
- 3  Afrique du Sud
- 4  Albanie
- 5  Algérie
- 6  Allemagne
- 7  Andorre
- 8  Angola
- 9  Anguilla
- 10  Antarctique [a]
- 11  Antigua-et-Barbuda
- 12  Arabie saoudite
- 13  Argentin
- 14  Arménie
- 15  Aruba
- 16  Australie [b]
- 17  Autriche
- 18  Azerbaïdjan
- 19  Bahamas (la)
- 20  Bahrain
- 21  Bangladesh
- 22  Barbade
- 23  Belgique
- 24  Belize
- 25  Bénin
- 26  Bhoutan
- 27  Biélorussie
- 28  Bolivie (État plurinational de)
- 29  Bonaire
- 30  Bosnie-herzégovine
- 31  Botswana
- 32  Brésil
- 33  Brunéi Darussalam [e]
- 34  Bulgarie
- 35  Burkina faso
- 36  Burundi
- 37  Cambodge
- 38  Cameroun
- 39  Canada
- 40  Cap-Vert [f]
- 41  Chili
- 42  Chine
- 43  Chypre
- 44  Colombie
- 45  Comores (las)
- 46  Congo (le) [g]
- 47  Congo (République démocratique du)
- 48  Corée (République de) [p]
- 49  Corée (République populaire démocratique de) [o]
- 50  Costa rica
- 51  Côte d'Ivoire [h]
- 52  Croatie
- 53  Cuba
- 54  Curaçao
- 55  Danemark
- 56  Djibouti
- 57  Dominica
- 58  Egypte
- 59  El salvador
- 60  Emirats Arabes Unis (ei)
- Equateur
- Érythrée
- Espagne
- Estonie
- Eswatini [j]
- États-Unis d'Amérique (les)
- Ethiopie
- Fédération de Russie (la) [v]
- Fidji
- Finlande

1  
2  
3  
4  
5  
6  
7  
8  
9  
10  
11  
12  
13  
14  
15  
16  
17  
18  
19  
20  
21  
22  
23  
24  
25  
26  
27  
28  
29  
30  
31  
32  
33  
34  
35  
36  
37  
38  
39  
40  
41  
42  
43  
44  
45  
46  
47  
48  
49  
50  
51  
52  
53  
54  
55  
56  
57  
58  
59  
60

- France [l]
- Gabon
- Gambie
- Géorgie
- Géorgie du Sud et îles Sandwich du Sud
- Ghana
- Gibraltar
- Grèce
- Grenade
- Groenland
- Guadalupe
- Guam
- Guatemala
- Guernsey
- Guinée
- Guinée équatoriale
- Guinée-bissau
- Guyane française
- Guyanes
- Honduras
- Hong kong
- Hongrie
- Île bouvet
- Île d'ascencion
- Ile de Man
- Île de Noël
- Île norfolk
- Îles caïmans
- Îles Cocos (Keeling) (les)
- Îles cook
- Îles d'aland
- Îles des Bermudes
- Îles Falkland (les) [Malouines] [k]
- Îles féroé
- Îles Heard et mcdonald
- Îles Mariannes du Nord
- Îles marshall
- Îles Mineures Éloignées des États-Unis (les) [ac]
- Îles salomon
- Îles Turques et Caïques (la)
- Îles Vierges (États-Unis,) [ag]
- Îles Vierges britanniques [af]
- Inde
- Indonésie
- Irak
- Iran (République islamique d ')
- Irlande
- Islande
- Israël
- Italie
- Jamaïque
- Jan mayen
- Japon
- Jersey
- Jordanie
- Kazakhstan
- Kenya
- Kiribati
- Koweït
- Kyrgyzstan
- Lesotho
- Lettonie
- Liban
- Libéria
- Libye
- Liechtenstein
- Lituanie
- Luxembourg
- Macao [r]
- Macédoine du Nord [s]

1  
2  
3  
4  
5  
6  
7  
8  
9  
10  
11  
12  
13  
14  
15  
16  
17  
18  
19  
20  
21  
22  
23  
24  
25  
26  
27  
28  
29  
30  
31  
32  
33  
34  
35  
36  
37  
38  
39  
40  
41  
42  
43  
44  
45  
46  
47  
48  
49  
50  
51  
52  
53  
54  
55  
56  
57  
58  
59  
60

- Madagascar
- Malaisie
- Malawien
- Maldives
- Mali
- Malte
- Maroc
- Martinique
- Mauricio
- Mauritanie
- Mayotte
- Mexique
- Micronésie (États fédérés de)
- Moldova (République de)
- Monaco
- Mongolie
- Monténégro
- Montserrat
- Mozambique
- Myanmar [t]
- Namibie
- Nauru
- Népal
- Nicaragua
- Niger (la)
- Nigeria
- Niue
- Norvège
- Nouvelle calédonie
- Nouvelle-zélande
- Oman
- Ouganda
- Ouzbékistan
- Pakistan
- Palau
- Palestine, État de
- Panama
- Papouasie-nouvelle-guinée
- Paraguay
- Pays-Bas (la)
- Pérou
- Philippines
- Pitcairn [u]
- Pologne
- Polynésie française
- Portugal
- Puerto rico
- Qatar
- République arabe syrienne (la) [x]
- République centrafricaine
- République démocratique populaire lao (la) [q]
- République dominicaine
- République tchèque [i]
- Réunion
- Roumanie
- Royaume-Uni de Grande-Bretagne et d'Irlande du Nord (il)
- Rwanda
- Saba
- Sahara occidental [ah]
- Saint Martin (partie française)
- Saint Pierre et Miquelon
- Saint Vincent et les Grenadines
- Saint-barthélemy
- Saint-Kitts-et-Nevis
- Saint-marin
- Saint-Siège (le) [n]
- Sainte-hélène
- Sainte-Lucie
- Samoa
- Samoa américaines

1  
2  
3  
4  
5  
6  
7  
8  
9  
10  
11  
12  
13  
14  
15  
16  
17  
18  
19  
20  
21  
22  
23  
24  
25  
26  
27  
28  
29  
30  
31  
32  
33  
34  
35  
36  
37  
38  
39  
40  
41  
42  
43  
44  
45  
46  
47  
48  
49  
50  
51  
52  
53  
54  
55  
56  
57  
58  
59  
60

- Sant'Eustachio
- Sao Tomé et Príncipe
- Sénégal
- Serbie
- Seychelles
- Sierra leone
- Singapour
- Sint Maarten (partie néerlandaise)
- Slovaquie
- Slovénie
- Somalie
- Soudan
- Soudan du Sud
- Sri lanka
- Suède
- Suisse
- Suriname
- Svalbard
- Taïwan (Province de Chine) [e]
- Tadjikistan
- Tanzanie, République-Unie de
- Tchad
- Territoire britannique de l'océan Indien (el)
- Territoires français du Sud (les) [m]
- Thaïlande
- Timor oriental [aa]
- Togo
- Tokelau
- Tonga
- Trinidad et Tobago
- Tristan da Cunha
- Tunisia
- Turkmenistan
- Turquie
- Tuvalu
- Ukraine
- Uruguay
- Vanuatu
- Venezuela (République bolivarienne du)
- Vietnam [ae]
- Wallis et Futuna
- Yémen
- Zambie
- Zimbabwe
- Un autre

---

Si vous êtes né(e) dans un autre pays, veuillez préciser :

---

## Section 2 : Comportements en matière de santé

Chaque point ci-dessous est une affirmation concernant votre santé avec laquelle vous pouvez être d'accord ou pas d'accord. Cette section sert à évaluer vos croyances personnelles ; il n'y a pas de bonnes ou de mauvaises réponses. Veuillez nous dire dans quelle mesure vous êtes d'accord ou pas d'accord avec chaque affirmation.

|                                                                                             | Pas du tout d'accord  | Pas d'accord          | Ni d'accord, ni pas d'accord | D'accord              | Tout à fait d'accord  |
|---------------------------------------------------------------------------------------------|-----------------------|-----------------------|------------------------------|-----------------------|-----------------------|
| 1. Si je suis malade, mon propre comportement détermine la rapidité de mon rétablissement.  | <input type="radio"/> | <input type="radio"/> | <input type="radio"/>        | <input type="radio"/> | <input type="radio"/> |
| 2. Quoi que je fasse, si je dois tomber malade, je tomberai malade.                         | <input type="radio"/> | <input type="radio"/> | <input type="radio"/>        | <input type="radio"/> | <input type="radio"/> |
| 3. Être en contact régulier avec mon médecin est le meilleur moyen de ne pas tomber malade. | <input type="radio"/> | <input type="radio"/> | <input type="radio"/>        | <input type="radio"/> | <input type="radio"/> |
| 4. La plupart des éléments qui ont une influence sur ma santé se produisent par hasard.     | <input type="radio"/> | <input type="radio"/> | <input type="radio"/>        | <input type="radio"/> | <input type="radio"/> |
| 5. Lorsque je ne me sens pas bien, je dois consulter un professionnel de la santé qualifié. | <input type="radio"/> | <input type="radio"/> | <input type="radio"/>        | <input type="radio"/> | <input type="radio"/> |
| 6. Je contrôle ma santé.                                                                    | <input type="radio"/> | <input type="radio"/> | <input type="radio"/>        | <input type="radio"/> | <input type="radio"/> |
| 7. Ma famille exerce une forte influence sur mon état de santé.                             | <input type="radio"/> | <input type="radio"/> | <input type="radio"/>        | <input type="radio"/> | <input type="radio"/> |
| 8. Lorsque je tombe malade, c'est de ma faute.                                              | <input type="radio"/> | <input type="radio"/> | <input type="radio"/>        | <input type="radio"/> | <input type="radio"/> |
| 9. La chance joue un grand rôle dans la vitesse à laquelle je me rétablis.                  | <input type="radio"/> | <input type="radio"/> | <input type="radio"/>        | <input type="radio"/> | <input type="radio"/> |
| 10. Les professionnels de la santé contrôlent mon état de santé.                            | <input type="radio"/> | <input type="radio"/> | <input type="radio"/>        | <input type="radio"/> | <input type="radio"/> |
| 11. Si je suis en bonne santé, c'est surtout une question de chance.                        | <input type="radio"/> | <input type="radio"/> | <input type="radio"/>        | <input type="radio"/> | <input type="radio"/> |
| 12. Le facteur qui a le plus d'influence sur ma santé est ce que je fais.                   | <input type="radio"/> | <input type="radio"/> | <input type="radio"/>        | <input type="radio"/> | <input type="radio"/> |



- |    |                                  |                       |                       |                       |                       |                       |
|----|----------------------------------|-----------------------|-----------------------|-----------------------|-----------------------|-----------------------|
| 1  | 13. Si je prends soin de moi, je | <input type="radio"/> |
| 2  | peux éviter de tomber malade.    |                       |                       |                       |                       |                       |
| 3  | 14. Lorsque je me rétablis après | <input type="radio"/> |
| 4  | avoir été malade, c'est          |                       |                       |                       |                       |                       |
| 5  | principalement parce que         |                       |                       |                       |                       |                       |
| 6  | d'autres personnes (par          |                       |                       |                       |                       |                       |
| 7  | exemple, les médecins, les       |                       |                       |                       |                       |                       |
| 8  | infirmiers, ma famille ou mes    |                       |                       |                       |                       |                       |
| 9  | amis) ont bien pris soin de moi. |                       |                       |                       |                       |                       |
| 10 |                                  |                       |                       |                       |                       |                       |
| 11 |                                  |                       |                       |                       |                       |                       |
| 12 | 15. Quoi que je fasse, je suis   | <input type="radio"/> |
| 13 | susceptible de tomber malade.    |                       |                       |                       |                       |                       |
| 14 |                                  |                       |                       |                       |                       |                       |
| 15 | 16. S'il doit en être ainsi, je  | <input type="radio"/> |
| 16 | resterai en bonne santé.         |                       |                       |                       |                       |                       |
| 17 |                                  |                       |                       |                       |                       |                       |
| 18 | 17. Si je prends les mesures     | <input type="radio"/> |
| 19 | adéquates, je peux rester en     |                       |                       |                       |                       |                       |
| 20 | bonne santé.                     |                       |                       |                       |                       |                       |
| 21 |                                  |                       |                       |                       |                       |                       |
| 22 | 18. En ce qui concerne ma        | <input type="radio"/> |
| 23 | santé, je ne peux faire que ce   |                       |                       |                       |                       |                       |
| 24 | que mon médecin me dit de        |                       |                       |                       |                       |                       |
| 25 | faire.                           |                       |                       |                       |                       |                       |
| 26 |                                  |                       |                       |                       |                       |                       |
| 27 |                                  |                       |                       |                       |                       |                       |
| 28 |                                  |                       |                       |                       |                       |                       |
| 29 |                                  |                       |                       |                       |                       |                       |
| 30 |                                  |                       |                       |                       |                       |                       |
| 31 |                                  |                       |                       |                       |                       |                       |
| 32 |                                  |                       |                       |                       |                       |                       |
| 33 |                                  |                       |                       |                       |                       |                       |
| 34 |                                  |                       |                       |                       |                       |                       |
| 35 |                                  |                       |                       |                       |                       |                       |
| 36 |                                  |                       |                       |                       |                       |                       |
| 37 |                                  |                       |                       |                       |                       |                       |
| 38 |                                  |                       |                       |                       |                       |                       |
| 39 |                                  |                       |                       |                       |                       |                       |
| 40 |                                  |                       |                       |                       |                       |                       |
| 41 |                                  |                       |                       |                       |                       |                       |
| 42 |                                  |                       |                       |                       |                       |                       |
| 43 |                                  |                       |                       |                       |                       |                       |
| 44 |                                  |                       |                       |                       |                       |                       |
| 45 |                                  |                       |                       |                       |                       |                       |
| 46 |                                  |                       |                       |                       |                       |                       |
| 47 |                                  |                       |                       |                       |                       |                       |
| 48 |                                  |                       |                       |                       |                       |                       |
| 49 |                                  |                       |                       |                       |                       |                       |
| 50 |                                  |                       |                       |                       |                       |                       |
| 51 |                                  |                       |                       |                       |                       |                       |
| 52 |                                  |                       |                       |                       |                       |                       |
| 53 |                                  |                       |                       |                       |                       |                       |
| 54 |                                  |                       |                       |                       |                       |                       |
| 55 |                                  |                       |                       |                       |                       |                       |
| 56 |                                  |                       |                       |                       |                       |                       |
| 57 |                                  |                       |                       |                       |                       |                       |
| 58 |                                  |                       |                       |                       |                       |                       |
| 59 |                                  |                       |                       |                       |                       |                       |
| 60 |                                  |                       |                       |                       |                       |                       |

For peer review only

1 **Section 3 - Croyances relatives au coronavirus**

2

3

4 **1. Selon vous, les experts de la santé publique ont-ils recommandé ces mesures pour ralentir**

5 **la propagation du coronavirus ?**

6

7

8

9

|                                        | Oui, recommandé       | Non, pas recommandé   | Je ne sais pas        |
|----------------------------------------|-----------------------|-----------------------|-----------------------|
| 10 a. Se laver fréquemment les         | <input type="radio"/> | <input type="radio"/> | <input type="radio"/> |
| 11 mains                               |                       |                       |                       |
| 12                                     |                       |                       |                       |
| 13 b. Faire bouillir l'eau avant de la | <input type="radio"/> | <input type="radio"/> | <input type="radio"/> |
| 14 boire                               |                       |                       |                       |
| 15                                     |                       |                       |                       |
| 16 c. Faire porter des masques aux     | <input type="radio"/> | <input type="radio"/> | <input type="radio"/> |
| 17 personnes en bonne santé en         |                       |                       |                       |
| 18 public                              |                       |                       |                       |
| 19                                     |                       |                       |                       |
| 20 d. Éviter les grands                | <input type="radio"/> | <input type="radio"/> | <input type="radio"/> |
| 21 rassemblements de personnes         |                       |                       |                       |
| 22                                     |                       |                       |                       |
| 23 e. Utiliser de l'antimoustique      | <input type="radio"/> | <input type="radio"/> | <input type="radio"/> |
| 24 f. Rester chez soi si l'on se sent  | <input type="radio"/> | <input type="radio"/> | <input type="radio"/> |
| 25 malade                              |                       |                       |                       |

26

27

28 g. Autres recommandations

29

30

31

32

33

34

35

36

37

38

39

40

41

42

43

44

45

46

47

48

49

50

51

52

53

54

55

56

57

58

59

60

**2. Selon vous, le coronavirus se transmet-il ou se propage-t-il par les moyens suivants ?**

Oui, transmis par ce moyen      Non, pas transmis par ce moyen      Je ne sais pas

- |                                                                                                     |                       |                       |                       |
|-----------------------------------------------------------------------------------------------------|-----------------------|-----------------------|-----------------------|
|                                                                                                     | <input type="radio"/> | <input type="radio"/> | <input type="radio"/> |
| a. Être en contact rapproché avec une personne infectée                                             | <input type="radio"/> | <input type="radio"/> | <input type="radio"/> |
| b. Toucher des surfaces contenant de petites quantités de fluides corporels d'une personne infectée | <input type="radio"/> | <input type="radio"/> | <input type="radio"/> |
| c. Se faire piquer par un moustique                                                                 | <input type="radio"/> | <input type="radio"/> | <input type="radio"/> |
| d. Par voie génétique                                                                               | <input type="radio"/> | <input type="radio"/> | <input type="radio"/> |

e. Par quelles autres voies le coronavirus se transmet-il ou se propage-t-il ? Veuillez expliquer.

\_\_\_\_\_

**3. Veuillez nous dire si vous pensez que les éléments suivants sont des symptômes courants d'une infection au coronavirus (COVID-19)**

|                                    | Oui, c'est un symptôme | Non, ce n'est pas un symptôme | Je ne sais pas        |
|------------------------------------|------------------------|-------------------------------|-----------------------|
| a. Fièvre                          | <input type="radio"/>  | <input type="radio"/>         | <input type="radio"/> |
| b. Toux sèche                      | <input type="radio"/>  | <input type="radio"/>         | <input type="radio"/> |
| c. Vomissements                    | <input type="radio"/>  | <input type="radio"/>         | <input type="radio"/> |
| d. Congestion nasale/nez qui coule | <input type="radio"/>  | <input type="radio"/>         | <input type="radio"/> |
| e. Éruptions cutanées              | <input type="radio"/>  | <input type="radio"/>         | <input type="radio"/> |

f. Autres symptômes (Veuillez préciser :)

---

For peer review only

**4. Pensez-vous que les groupes ci-dessous risquent davantage de développer de graves complications médicales une fois infectés par le coronavirus ?**

|                                                         | Oui, plus de risques  | Non, pas plus de risques | Je ne sais pas        |
|---------------------------------------------------------|-----------------------|--------------------------|-----------------------|
| a. Enfants                                              | <input type="radio"/> | <input type="radio"/>    | <input type="radio"/> |
| b. Femmes enceintes                                     | <input type="radio"/> | <input type="radio"/>    | <input type="radio"/> |
| c. Personnes atteintes de problèmes médicaux chroniques | <input type="radio"/> | <input type="radio"/>    | <input type="radio"/> |
| d. Personnes âgées d'une vingtaine d'années             | <input type="radio"/> | <input type="radio"/>    | <input type="radio"/> |
| e. Personnes obèses                                     | <input type="radio"/> | <input type="radio"/>    | <input type="radio"/> |
| f. Personnes de plus de 60 ans                          | <input type="radio"/> | <input type="radio"/>    | <input type="radio"/> |

5. Selon vous, existe-t-il un vaccin pour protéger les personnes du coronavirus actuel, également connu sous le nom de COVID-19 ?  Oui  Non  Je ne sais pas

6. Selon vous, le vaccin contre la grippe protège-t-il les personnes du coronavirus actuel, également connu sous le nom de COVID-19 ?  Oui  Non  Je ne sais pas

7. Selon vous, si une personne pense présenter les symptômes du coronavirus, que doit-elle faire ?  Rester chez elle et appeler un médecin  Se rendre immédiatement dans un service des urgences  Autre chose  Je ne sais pas

7a. Autre chose, veuillez expliquer

---

**Section 4 - Inquiétudes et expériences en matière de santé**

1. Pensez-vous disposer de suffisamment d'informations sur les moyens de vous protéger et de protéger votre famille du coronavirus ?  Oui  Non  Je ne sais pas

2. Le cas échéant, que faites-vous pour vous protéger et protéger votre famille du coronavirus ?

3. Pensez-vous que les inquiétudes et le stress liés au coronavirus ont une influence négative sur votre santé mentale ?  Oui, une influence majeure  Oui, une influence mineure  Non  Je ne sais pas

3b. Veuillez expliquer :

For peer review only

1 **q4. Dans quelle mesure estimez-vous que chacun des groupes suivants se montre efficace**  
2 **dans la lutte contre le coronavirus et le COVID-19 ?**

3  
4 a. Le système des soins de santé (y compris les  
5 hôpitaux, cliniques, médecins, infirmiers et autres  
6 prestataires de soins de santé)

- Pas du tout efficace  
 Pas très efficace  
 Assez efficace  
 Très efficace

7  
8  
9 a. Veuillez expliquer :  
10  
11  
12 \_\_\_\_\_

13  
14 b. Le monde de la science (y compris les chercheurs et  
15 analystes)

- Pas du tout efficace  
 Pas très efficace  
 Assez efficace  
 Très efficace

16  
17  
18  
19 b. Veuillez expliquer :  
20  
21  
22 \_\_\_\_\_

23 c. Le gouvernement (y compris les gouvernements locaux  
24 et nationaux)

- Pas du tout efficace  
 Pas très efficace  
 Assez efficace  
 Très efficace

25  
26  
27  
28 c. Veuillez expliquer :  
29  
30  
31 \_\_\_\_\_

32 d. Le système éducatif (y compris les écoles  
33 primaires et secondaires, et les universités)

- Pas du tout efficace  
 Pas très efficace  
 Assez efficace  
 Très efficace

34  
35  
36  
37 d. Veuillez expliquer :  
38  
39  
40  
41 \_\_\_\_\_

42 e. Les commerces et services locaux (y compris les  
43 boutiques, supermarchés et restaurants)

- Pas du tout efficace  
 Pas très efficace  
 Assez efficace  
 Très efficace

44  
45  
46  
47 e. Veuillez expliquer :  
48  
49  
50 \_\_\_\_\_

51 f. L'industrie (y compris les grands employeurs, les  
52 usines et les fabricants)

- Pas du tout efficace  
 Pas très efficace  
 Assez efficace  
 Très efficace

53  
54  
55  
56 f. Veuillez expliquer :  
57  
58  
59  
60 \_\_\_\_\_

1 g. La presse (y compris les journalistes, les  
2 journaux, la télévision et les médias visuels)

- Pas du tout efficace
- Pas très efficace
- Assez efficace
- Très efficace

6 g. Veuillez expliquer :

\_\_\_\_\_

11 h. Les réseaux sociaux

- Pas du tout efficace
- Pas très efficace
- Assez efficace
- Très efficace

16 h. Veuillez expliquer :

\_\_\_\_\_

For peer review only

1  
2  
3  
4  
5  
6  
7  
8  
9  
10  
11  
12  
13  
14  
15  
16  
17  
18  
19  
20  
21  
22  
23  
24  
25  
26  
27  
28  
29  
30  
31  
32  
33  
34  
35  
36  
37  
38  
39  
40  
41  
42  
43  
44  
45  
46  
47  
48  
49  
50  
51  
52  
53  
54  
55  
56  
57  
58  
59  
60



**5. Dans quelle mesure les éléments suivants vous inquiètent-ils ?**

|                                                                                                                                                       | Très inquiétants      | Plutôt inquiétants    | Pas très inquiétants  | Pas du tout inquiétants | Je ne sais pas        |
|-------------------------------------------------------------------------------------------------------------------------------------------------------|-----------------------|-----------------------|-----------------------|-------------------------|-----------------------|
| a. Vous ou un membre de votre famille contractez le coronavirus                                                                                       | <input type="radio"/> | <input type="radio"/> | <input type="radio"/> | <input type="radio"/>   | <input type="radio"/> |
| b. Vous perdez des revenus en raison de la fermeture de votre lieu de travail ou d'une réduction de vos heures de travail en lien avec le coronavirus | <input type="radio"/> | <input type="radio"/> | <input type="radio"/> | <input type="radio"/>   | <input type="radio"/> |
| c. Vous contractez la maladie de Lyme                                                                                                                 | <input type="radio"/> | <input type="radio"/> | <input type="radio"/> | <input type="radio"/>   | <input type="radio"/> |
| d. Le coronavirus a des répercussions négatives sur vos investissements, notamment votre épargne-pension ou épargne-études                            | <input type="radio"/> | <input type="radio"/> | <input type="radio"/> | <input type="radio"/>   | <input type="radio"/> |
| e. Vous contractez la dengue                                                                                                                          | <input type="radio"/> | <input type="radio"/> | <input type="radio"/> | <input type="radio"/>   | <input type="radio"/> |
| f. Vous vous exposez au coronavirus, car vous ne pouvez pas vous permettre de rester chez vous et de vous absenter du travail                         | <input type="radio"/> | <input type="radio"/> | <input type="radio"/> | <input type="radio"/>   | <input type="radio"/> |
| g. Vous ne pouvez pas financièrement vous permettre de vous faire dépister ou traiter en cas de besoin                                                | <input type="radio"/> | <input type="radio"/> | <input type="radio"/> | <input type="radio"/>   | <input type="radio"/> |

h. Autre inquiétude, veuillez expliquer

\_\_\_\_\_

5b. Dans quelle mesure votre vie a-t-elle été perturbée par l'épidémie de coronavirus ?

- Complètement
- Beaucoup
- Juste un peu
- Pas du tout
- Je ne sais pas

5b. Veuillez expliquer dans quelle mesure votre vie a été perturbée par l'épidémie de coronavirus.

\_\_\_\_\_

**6. Avez-vous adopté les mesures suivantes en raison de la récente épidémie de coronavirus ?**

|                                                                                                            | Oui                   | Non                   | Je ne sais pas        |
|------------------------------------------------------------------------------------------------------------|-----------------------|-----------------------|-----------------------|
| a. Décider de ne pas voyager ou changer les projets de voyage                                              | <input type="radio"/> | <input type="radio"/> | <input type="radio"/> |
| b. Acheter ou porter un masque de protection                                                               | <input type="radio"/> | <input type="radio"/> | <input type="radio"/> |
| c. Faire des provisions d'articles tels que de la nourriture ou des produits ménagers                      | <input type="radio"/> | <input type="radio"/> | <input type="radio"/> |
| d. Reporter ou annuler des rendez-vous médicaux                                                            | <input type="radio"/> | <input type="radio"/> | <input type="radio"/> |
| e. Faire des réserves de médicaments sur ordonnance                                                        | <input type="radio"/> | <input type="radio"/> | <input type="radio"/> |
| f. Rester chez vous au lieu de vous rendre à l'école, au travail ou à d'autres activités habituelles       | <input type="radio"/> | <input type="radio"/> | <input type="radio"/> |
| g. Reporter ou annuler une procédure médicale ou chirurgicale                                              | <input type="radio"/> | <input type="radio"/> | <input type="radio"/> |
| h. Annuler votre participation à de grands rassemblements tels que des concerts ou des événements sportifs | <input type="radio"/> | <input type="radio"/> | <input type="radio"/> |
| i. Démissionner                                                                                            | <input type="radio"/> | <input type="radio"/> | <input type="radio"/> |

6b. N'hésitez pas à nous faire part d'explications ou de détails au sujet des éléments ci-dessus :

---

**7. Avez-vous rencontré les situations suivantes en raison du coronavirus ?**

7a. Vous avez perdu des revenus d'un emploi ou d'une entreprise

- Oui  
 Non  
 Je ne sais pas

a. Vous avez perdu des revenus d'un emploi ou d'une entreprise, veuillez expliquer

\_\_\_\_\_

7b. Vous n'avez pas pu faire vos courses

- Oui  
 Non  
 Je ne sais pas

b. Vous n'avez pas pu faire vos courses, veuillez expliquer

\_\_\_\_\_

7c. Vous n'avez pas pu acheter de produits d'entretien ou de gel hydroalcoolique

- Oui  
 Non  
 Je ne sais pas

7c. Vous n'avez pas pu acheter de produits d'entretien ou de gel hydroalcoolique, veuillez expliquer

\_\_\_\_\_

7d. Vous n'avez pas pu acheter vos médicaments sur ordonnance

- Oui  
 Non  
 Je ne sais pas

d. Vous n'avez pas pu acheter vos médicaments sur ordonnance, veuillez expliquer

\_\_\_\_\_

7e. Vous ou un membre de votre famille avez été harcelés, maltraités ou blessés en raison du coronavirus

- Oui  
 Non  
 Je ne sais pas

7e. Vous ou un membre de votre famille avez été harcelé, maltraité ou blessé en raison du coronavirus, veuillez expliquer.

\_\_\_\_\_

8. Dans quelle mesure suivez-vous les consignes de distanciation sociale ou physique, à savoir rester chez vous, rester à l'écart des autres autant que possible, ou rester à l'écart des autres lorsque vous vous trouvez dans un lieu public ?

- Très étroitement  
 Plutôt étroitement  
 Pas très étroitement  
 Pas étroitement du tout

Veuillez nous faire part de vos idées et de vos expériences en matière de distanciation sociale ou physique : (question ouverte)

\_\_\_\_\_

9. Avez-vous personnellement effectué un test de dépistage du coronavirus ?

- Oui, j'ai été dépisté(e)  
 Non, je n'ai pas été dépisté(e)  
 Je ne sais pas

1 9a. Parmi les personnes dépistées : quel a été le  
2 résultat du test ?  
3  Le test était positif  
4  Le test était négatif  
5  Je ne sais pas encore

6 10. Parmi les personnes non dépistées : avez-vous  
7 tenté d'effectuer un test de dépistage du  
8 coronavirus ?  
9  Oui  
10  Non  
11  Je ne sais pas

12 11. Parmi les personnes non dépistées : Pensez-vous  
13 que vous pourriez effectuer un test de dépistage du  
14 coronavirus si vous pensiez en avoir besoin ?  
15  Oui  
16  Non  
17  Je ne sais pas

18 11. Veuillez nous expliquer où vous pensez que vous  
19 pourriez effectuer un test de dépistage du  
20 coronavirus si vous pensiez en avoir besoin.  
21 \_\_\_\_\_

22 11. Veuillez nous expliquer pourquoi vous pensez que  
23 vous ne pourriez pas effectuer de test de dépistage  
24 du coronavirus si vous pensiez en avoir besoin.  
25 \_\_\_\_\_

26 12. Pensez-vous être - ou avoir récemment été -  
27 infecté(e) par le coronavirus ?  
28  Oui  
29  Non  
30  Je ne sais pas

31 Veuillez expliquer pourquoi vous pensez être - ou  
32 avoir récemment été - infecté(e) par le  
33 coronavirus  
34 \_\_\_\_\_

35 13. S'il existait un vaccin qui empêche de contracter  
36 le coronavirus, vous feriez-vous vacciner ?  
37  Oui  
38  Non  
39  Je ne sais pas

40 Veuillez expliquer pourquoi vous vous feriez vacciner  
41 s'il existait un vaccin.  
42 \_\_\_\_\_

43 Veuillez expliquer pourquoi vous ne vous feriez pas  
44 vacciner s'il existait un vaccin.  
45 \_\_\_\_\_

46 Veuillez expliquer pourquoi vous ne savez pas si vous  
47 feriez vacciner s'il existait un vaccin.  
48 \_\_\_\_\_

49 14. Connaissez-vous personnellement une personne  
50 infectée par le coronavirus (ou COVID-19) ? Cochez  
51 toutes les réponses qui s'appliquent.  
52  Oui, un membre de ma famille  
53  Oui, un ami  
54  Oui, un voisin  
55  Oui, quelqu'un d'autre  
56  Non  
57  Je ne sais pas

58 15. Connaissez-vous personnellement une personne  
59 décédée d'une infection au coronavirus (ou  
60 COVID-19) ? Cochez toutes les réponses qui  
s'appliquent.  
 Oui, un membre de ma famille  
 Oui, un ami  
 Oui, un voisin  
 Oui, quelqu'un d'autre  
 Non  
 Je ne sais pas

1  
2  
3  
4  
5  
6  
7  
8  
9  
10  
11  
12  
13  
14  
15  
16  
17  
18  
19  
20  
21  
22  
23  
24  
25  
26  
27  
28  
29  
30  
31  
32  
33  
34  
35  
36  
37  
38  
39  
40  
41  
42  
43  
44  
45  
46  
47  
48  
49  
50  
51  
52  
53  
54  
55  
56  
57  
58  
59  
60

---

16. La population parle-t-elle en mauvais termes des personnes qui vivent avec le coronavirus (ou COVID-19), ou en ont été infectées ou supposément infectées ?

- Absolument
- Probablement
- Probablement pas
- Absolument pas
- Je ne sais pas

---

17. Les personnes qui ont été infectées par le coronavirus (ou COVID-19) ont-elles perdu du respect ou leur statut dans la communauté ?

- Absolument
- Probablement
- Probablement pas
- Absolument pas
- Je ne sais pas

For peer review only

**Section 5 - Questions relatives à votre ménage**

- 1  
2  
3  
4  
5  
6  
7
- 8 **1. Possédez-vous une voiture ?**  Oui  
9  Non  
10  Je préfère ne pas répondre  
11
- 
- 12 **2. Possédez-vous une habitation ?**  Oui  
13  Non  
14  Je préfère ne pas répondre  
15
- 
- 16 **3. Êtes-vous le parent ou le tuteur d'un enfant de**  
17 **moins de 18 ans qui vit dans votre ménage ?**  Oui  
18  Non  
19  Je ne sais pas  
20
- 
- 21 **4. L'école ou la garderie de votre enfant a-t-elle**  
22 **été fermée pendant une quelconque période en**  
23 **raison du coronavirus ?**  Oui  
24  Non  
25  Je ne sais pas
- 
- 26 **5. Si l'école ou la garderie de votre enfant a été**  
27 **fermée pendant au moins deux semaines en raison du**  
28 **coronavirus, dans quelle mesure vous a-t-il été**  
29 **difficile de trouver une solution de garde alternative**  
30 **?**  Très difficile  
31  Assez difficile  
32  Pas très difficile  
33  Pas difficile du tout
- 
- 34 **6. Si vous deviez rester chez vous en raison de**  
35 **mesures de quarantaine ou de la fermeture de votre**  
36 **école ou lieu de travail, pourriez-vous continuer à**  
37 **remplir vos fonctions, même en partie ?**  Oui  
38  Non  
39  Ne s'applique pas  
40  Je ne sais pas
- 
- 41 **6. Veuillez expliquer comment vous pourriez continuer**  
42 **à remplir vos fonctions, au moins en partie**  
43 \_\_\_\_\_  
44
- 
- 45 **6. Veuillez expliquer pourquoi vous ne pourriez pas**  
46 **continuer à remplir vos fonctions, même en partie**  
47 \_\_\_\_\_  
48
- 
- 49 **7. Vous ou un membre de votre ménage travaillez-vous**  
50 **dans un cadre médical, comme le cabinet d'un**  
51 **médecin, une clinique, un hôpital, une maison de**  
52 **retraite ou le cabinet d'un dentiste ? (Cochez toutes**  
53 **les réponses qui s'appliquent)**  Oui, moi  
54  Oui, un membre de mon ménage  
55  Non, personne  
56  Je ne sais pas
- 
- 57 **8. Combien d'enfants de moins de 18 ans vivent**  
58 **actuellement dans votre ménage ?** \_\_\_\_\_  
59
- 
- 60 **9. Combien d'adultes de 18 ans ou plus vivent**  
61 **actuellement dans votre ménage, vous y compris ?** \_\_\_\_\_
- 
- 62 **10. Avez-vous des enfants à charge ?**  Oui  
63  Non  
64  Je ne sais pas

1  
2  
3  
4  
5  
6  
7  
8  
9  
10  
11  
12  
13  
14  
15  
16  
17  
18  
19  
20  
21  
22  
23  
24  
25  
26  
27  
28  
29  
30  
31  
32  
33  
34  
35  
36  
37  
38  
39  
40  
41  
42  
43  
44  
45  
46  
47  
48  
49  
50  
51  
52  
53  
54  
55  
56  
57  
58  
59  
60

---

11. Vous incombe-t-il de prendre soin de personnes âgées ?

- Oui
- Non
- Je ne sais pas

---

Veillez nous parler de votre système de soutien social (amis, famille, voisins) :

---

For peer review only

**Section 6 : Stress au cours du mois dernier**

|                                                                                                                                      | Jamais                | Presque jamais        | Parfois               | Assez souvent         | Très souvent          |
|--------------------------------------------------------------------------------------------------------------------------------------|-----------------------|-----------------------|-----------------------|-----------------------|-----------------------|
| 1. Au cours du mois dernier, combien de fois avez-vous été contrarié(e) par un événement inattendu ?                                 | <input type="radio"/> |
| 2. Au cours du mois dernier, combien de fois avez-vous pensé ne pas être capable de contrôler les éléments importants de votre vie ? | <input type="radio"/> |
| 3. Au cours du mois dernier, combien de fois vous êtes-vous senti(e) nerveux(-se) et stressé(e) ?                                    | <input type="radio"/> |
| 4. Au cours du mois dernier, combien de fois avez-vous eu confiance en votre capacité à gérer vos problèmes personnels ?             | <input type="radio"/> |
| 5. Au cours du mois dernier, combien de fois avez-vous senti que les choses allaient dans votre sens ?                               | <input type="radio"/> |
| 6. Au cours du mois dernier, combien de fois vous êtes-vous senti(e) débordé(e) par toutes les choses que vous deviez faire ?        | <input type="radio"/> |
| 7. Au cours du mois dernier, combien de fois avez-vous pu contrôler les désagréments de votre vie ?                                  | <input type="radio"/> |
| 8. Au cours du mois dernier, combien de fois avez-vous pensé contrôler la situation ?                                                | <input type="radio"/> |
| 9. Au cours du mois dernier, combien de fois vous êtes-vous mis(e) en colère en raison d'éléments qui échappent à votre contrôle ?   | <input type="radio"/> |



1 10. Au cours du mois dernier,                   ○                   ○                   ○                   ○                   ○  
2 combien de fois avez-vous pensé  
3 devoir affronter tellement de  
4 difficultés qu'il vous serait  
5 impossible de les surmonter ?  
6  
7

---

8 11. Veuillez nous parler de votre sentiment de stress  
9 au cours du mois dernier :  
10 \_\_\_\_\_  
11

12  
13  
14  
15  
16  
17  
18  
19  
20  
21  
22  
23  
24  
25  
26  
27  
28  
29  
30  
31  
32  
33  
34  
35  
36  
37  
38  
39  
40  
41  
42  
43  
44  
45  
46  
47  
48  
49  
50  
51  
52  
53  
54  
55  
56  
57  
58  
59  
60

For peer review only

**Section 7 - Soutien social**

|                                                                          | Absolument pas d'accord | Pas du tout d'accord  | Pas vraiment d'accord | Neutre                | Plutôt d'accord       | Tout à fait d'accord  | Absolument d'accord   |
|--------------------------------------------------------------------------|-------------------------|-----------------------|-----------------------|-----------------------|-----------------------|-----------------------|-----------------------|
| 1. Un être cher m'aide quand j'en ai besoin.                             | <input type="radio"/>   | <input type="radio"/> | <input type="radio"/> | <input type="radio"/> | <input type="radio"/> | <input type="radio"/> | <input type="radio"/> |
| 2. Un être cher me permet de partager mes joies et mes peines.           | <input type="radio"/>   | <input type="radio"/> | <input type="radio"/> | <input type="radio"/> | <input type="radio"/> | <input type="radio"/> | <input type="radio"/> |
| 3. Ma famille fait tout pour m'aider.                                    | <input type="radio"/>   | <input type="radio"/> | <input type="radio"/> | <input type="radio"/> | <input type="radio"/> | <input type="radio"/> | <input type="radio"/> |
| 4. Ma famille me fournit le soutien émotionnel dont j'ai besoin.         | <input type="radio"/>   | <input type="radio"/> | <input type="radio"/> | <input type="radio"/> | <input type="radio"/> | <input type="radio"/> | <input type="radio"/> |
| 5. Un être cher me fournit tout le réconfort dont j'ai besoin.           | <input type="radio"/>   | <input type="radio"/> | <input type="radio"/> | <input type="radio"/> | <input type="radio"/> | <input type="radio"/> | <input type="radio"/> |
| 6. Mes amis font tout pour m'aider.                                      | <input type="radio"/>   | <input type="radio"/> | <input type="radio"/> | <input type="radio"/> | <input type="radio"/> | <input type="radio"/> | <input type="radio"/> |
| 7. Je peux compter sur mes amis quand les choses vont mal.               | <input type="radio"/>   | <input type="radio"/> | <input type="radio"/> | <input type="radio"/> | <input type="radio"/> | <input type="radio"/> | <input type="radio"/> |
| 8. Je peux parler de mes problèmes avec ma famille.                      | <input type="radio"/>   | <input type="radio"/> | <input type="radio"/> | <input type="radio"/> | <input type="radio"/> | <input type="radio"/> | <input type="radio"/> |
| 9. J'ai des amis qui me permettent de partager mes joies et mes peines.  | <input type="radio"/>   | <input type="radio"/> | <input type="radio"/> | <input type="radio"/> | <input type="radio"/> | <input type="radio"/> | <input type="radio"/> |
| 10. J'ai la chance d'avoir un être cher qui se soucie de mes sentiments. | <input type="radio"/>   | <input type="radio"/> | <input type="radio"/> | <input type="radio"/> | <input type="radio"/> | <input type="radio"/> | <input type="radio"/> |
| 11. Ma famille essaie de m'aider à prendre des décisions.                | <input type="radio"/>   | <input type="radio"/> | <input type="radio"/> | <input type="radio"/> | <input type="radio"/> | <input type="radio"/> | <input type="radio"/> |
| 12. Je peux parler de mes problèmes avec mes amis.                       | <input type="radio"/>   | <input type="radio"/> | <input type="radio"/> | <input type="radio"/> | <input type="radio"/> | <input type="radio"/> | <input type="radio"/> |

**Section 8 : Questions relatives à la santé**

1. De manière générale, diriez-vous que votre état de santé est

- Excellent  
 Très bon  
 Bon  
 Assez bon  
 Mauvais

2. En ce qui concerne votre santé physique, à savoir notamment les maladies et blessures physiques, pendant combien de jours votre santé physique n'a-t-elle pas été bonne au cours des 30 derniers jours ?

\_\_\_\_\_  
((nombre de jours))

3. En ce qui concerne votre santé mentale, à savoir notamment le stress, la dépression et les problèmes émotionnels, pendant combien de jours votre santé mentale n'a-t-elle pas été bonne au cours des 30 derniers jours ?

\_\_\_\_\_  
((nombre de jours))

4. Au cours des 30 derniers jours, pendant combien de jours environ votre mauvais état de santé physique ou mental vous a-t-il empêché de pratiquer vos activités habituelles, comme prendre soin de vous, travailler ou vous divertir ?

\_\_\_\_\_  
((nombre de jours))

5. Au cours de 12 derniers mois, avez-vous eu besoin de soins de santé (par exemple, consulter un médecin) sans pouvoir vous les permettre en raison de leur coût ?

- Oui  
 Non  
 Je ne sais pas

6. Vous ou un membre de votre ménage souffrez-vous d'un grave problème de santé, comme une hypertension artérielle, une maladie cardiaque ou pulmonaire, un cancer ou du diabète ? (Cochez toutes les réponses qui s'appliquent)

- Oui, moi  
 Oui, un membre de mon ménage  
 Non, personne  
 Je ne sais pas

7. Une des propositions ci-dessous s'applique-t-elle à vous ? (Cochez toutes les réponses qui s'appliquent)

- Je suis actuellement enceinte  
 Ma partenaire est actuellement enceinte  
 Ni ma partenaire ni moi ne sommes actuellement enceintes

8. Désirez-vous tomber enceinte ou avoir un enfant au cours de l'année à venir ?

- Oui  
 Non  
 Je ne sais pas

**Section 9 : Réseaux sociaux****1. Parmi les réseaux sociaux suivants, lesquels utilisez-vous ? (Pour chaque proposition, cochez la réponse la plus appropriée)**

|              | tous les jours        | plusieurs fois par semaine | plusieurs fois par mois | rarement              | jamais                |
|--------------|-----------------------|----------------------------|-------------------------|-----------------------|-----------------------|
| a. Facebook  | <input type="radio"/> | <input type="radio"/>      | <input type="radio"/>   | <input type="radio"/> | <input type="radio"/> |
| b. Twitter   | <input type="radio"/> | <input type="radio"/>      | <input type="radio"/>   | <input type="radio"/> | <input type="radio"/> |
| c. LinkedIn  | <input type="radio"/> | <input type="radio"/>      | <input type="radio"/>   | <input type="radio"/> | <input type="radio"/> |
| d. Instagram | <input type="radio"/> | <input type="radio"/>      | <input type="radio"/>   | <input type="radio"/> | <input type="radio"/> |
| e. WhatsApp  | <input type="radio"/> | <input type="radio"/>      | <input type="radio"/>   | <input type="radio"/> | <input type="radio"/> |
| f. Snapchat  | <input type="radio"/> | <input type="radio"/>      | <input type="radio"/>   | <input type="radio"/> | <input type="radio"/> |
| g. Reddit    | <input type="radio"/> | <input type="radio"/>      | <input type="radio"/>   | <input type="radio"/> | <input type="radio"/> |

2. Dans quelle mesure votre utilisation des réseaux sociaux a-t-elle évolué depuis le début de la pandémie de coronavirus ?

- J'utilise beaucoup plus les réseaux sociaux  
 J'utilise un peu plus les réseaux sociaux  
 Je n'utilise plus les réseaux sociaux  
 Je ne sais pas

2b. Veuillez expliquer dans quelle mesure votre utilisation des réseaux sociaux a évolué depuis le début de la pandémie de coronavirus :

\_\_\_\_\_

**Section 10 : Questions à caractère démographique**

1. En années, quel âge avez-vous actuellement ?

\_\_\_\_\_

2. Comment décririez-vous vos origines ethniques ?

\_\_\_\_\_

4. Vous considérez-vous de l'une des origines suivantes ? (Cochez toutes les réponses qui s'appliquent)

- Mexicaine
- Portoricaine
- Cubaine

4a. Si vous vous considérez comme faisant partie d'une autre ethnie hispanique ou latine que celles énumérées ci-dessus, veuillez préciser :

\_\_\_\_\_

4b. Je ne me considère pas comme d'origine hispanique ou latine

- Vrai
- Faux

5. Quel niveau scolaire avez-vous atteint ?

- Je n'ai pas terminé l'enseignement secondaire
- J'ai terminé l'enseignement secondaire
- J'ai fait des études supérieures, mais ne les ai pas terminées
- J'ai obtenu mon diplôme universitaire
- J'ai obtenu un diplôme universitaire de troisième cycle (doctorat, etc.)

**6. Le cas échéant, quelle est votre religion actuelle ? Cochez toutes les réponses qui s'appliquent**

|                                       | Oui                   | Non                   | Je préfère ne pas répondre |
|---------------------------------------|-----------------------|-----------------------|----------------------------|
| a. Christianisme                      | <input type="radio"/> | <input type="radio"/> | <input type="radio"/>      |
| b. Judaïsme                           | <input type="radio"/> | <input type="radio"/> | <input type="radio"/>      |
| c. Islam                              | <input type="radio"/> | <input type="radio"/> | <input type="radio"/>      |
| d. Bouddhisme                         | <input type="radio"/> | <input type="radio"/> | <input type="radio"/>      |
| e. Hindouisme                         | <input type="radio"/> | <input type="radio"/> | <input type="radio"/>      |
| f. Athéisme (je ne crois pas en Dieu) | <input type="radio"/> | <input type="radio"/> | <input type="radio"/>      |
| g. Autre                              | <input type="radio"/> | <input type="radio"/> | <input type="radio"/>      |
| h. Je ne sais pas                     | <input type="radio"/> | <input type="radio"/> | <input type="radio"/>      |

6g. Autre religion, veuillez préciser

\_\_\_\_\_

7. Si vous vivez aux États-Unis, veuillez identifier votre ethnie (cochez toutes les réponses qui s'appliquent)

- Amérindien(e) ou alaskain(e)  
 Asiatique  
 Noir ou Africain(e) américain(e)  
 Natif(ve) hawaïen(e)  
 Polynésien(e)  
 Caucasien(e)  
 Autre(s)

7. Vous avez sélectionné autre, veuillez préciser votre autre ethnie

\_\_\_\_\_

7. À laquelle des catégories suivantes vous identifiez-vous ?

- Entendant/non-sourd  
 Malentendant  
 sourd  
 Sourd  
 SourdAveugle

Dans le cadre de cette étude, veuillez utiliser les définitions suivantes.

Entendant/non-sourd : Personne sans perte auditive ;

Malentendant : Personne souffrant d'une certaine perte auditive ;

sourd : Personne souffrant d'une perte auditive ;

Sourd : Personne souffrant d'une perte auditive et s'identifiant à la culture Sourde ;

SourdAveugle : Personne souffrant d'une perte auditive et d'une perte totale ou partielle de la vue.

9. Parmi les propositions ci-dessous, laquelle décrit le mieux votre genre ?

- Homme  
 Femme  
 Autre option

1 q9. Vous avez sélectionné une autre option pour  
2 décrire votre genre, veuillez expliquer :  
3  
4

\_\_\_\_\_

5 10. Vous vous décrivez comme (cochez toutes les  
6 réponses qui s'appliquent) :

- 7  Hétérosexuel(le)
- 8  Gay
- 9  Lesbienne
- 10  Bisexuel(le)
- 11  Transgenre
- 12  Aucune des propositions ci-dessus

13 10a. Aucune des propositions ci-dessus, veuillez  
14 préciser :  
15

\_\_\_\_\_

For peer review only

1 **Section 11 : Dernière question**  
2  
3  
4

5  
6 1. Si vous avez d'autres réflexions au sujet du  
7 coronavirus et du COVID-19, veuillez nous en faire  
8 part : \_\_\_\_\_  
9  
10  
11  
12  
13  
14  
15  
16  
17  
18  
19  
20  
21  
22  
23  
24  
25  
26  
27  
28  
29  
30  
31  
32  
33  
34  
35  
36  
37  
38  
39  
40  
41  
42  
43  
44  
45  
46  
47  
48  
49  
50  
51  
52  
53  
54  
55  
56  
57  
58  
59  
60

For peer review only



**Section 12 : Qualité de l'enquête**

**Nous aimerions vous poser quelques questions à propos de cette enquête afin de l'améliorer à l'avenir. Si vous désirez mettre l'accent sur certaines questions spécifiques, veuillez les copier et les coller dans le champ de texte.**

1. En général, les questions de l'enquête étaient >. Autrement dit, vous n'avez pas dû lire plusieurs fois les énoncés pour les comprendre.

Pas du tout d'accord  
 Pas d'accord  
 Ni d'accord, ni pas d'accord  
 D'accord  
 Tout à fait d'accord

2. Certaines questions spécifiques étaient-elles particulièrement difficiles à comprendre ? Si oui, veuillez préciser lesquelles (aussi précisément que possible)

3. En règle générale, la signification des questions était simple et claire

Pas du tout d'accord  
 Pas d'accord  
 Ni d'accord, ni pas d'accord  
 D'accord  
 Tout à fait d'accord

4. Certaines questions manquaient-elles de clarté ? Si oui, veuillez préciser lesquelles (aussi précisément que possible)

Oui  Non

4a. Si oui, veuillez préciser lesquelles (aussi précisément que possible)

5. Les échelles utilisées pour répondre aux questions étaient adéquates. Autrement dit, selon vous, les échelles fournies vous permettaient-elles de répondre de manière appropriée ?

Pas du tout d'accord  
 Pas d'accord  
 Ni d'accord, ni pas d'accord  
 D'accord  
 Tout à fait d'accord

6. Selon vous, certaines questions étaient-elles rédigées de manière à ce qu'il n'y ait qu'une SEULE réponse ÉVIDENTE pour vous ?

Oui  
 No

6b. Veuillez expliquer :

N'hésitez pas à indiquer tout autre commentaire au sujet de cette étude

( )

Pour plus d'informations au sujet du coronavirus et du COVID-19, rendez-vous sur

<https://www.gouvernement.fr/info-coronavirus>

<https://www.cdc.gov/coronavirus/2019-ncov/index.html>

<https://www.cdc.gov/>

1 <https://www.who.int/>

2  
3  
4  
5 Merci!

6  
7  
8  
9  
10  
11  
12  
13  
14  
15  
16  
17  
18  
19  
20  
21  
22  
23  
24  
25  
26  
27  
28  
29  
30  
31  
32  
33  
34  
35  
36  
37  
38  
39  
40  
41  
42  
43  
44  
45  
46  
47  
48  
49  
50  
51  
52  
53  
54  
55  
56  
57  
58  
59  
60

For peer review only

# Sondaggio globale sul coronavirus

1 Benvenuto! Con la presente ti invitiamo a partecipare a un sondaggio epidemiologico globale condotto dall'Università  
2 di Rochester, in modo da consentirci una migliore comprensione delle opinioni, convinzioni e conoscenze relative ad  
3 alcune tematiche legate alle attuali questioni di sanità pubblica, come il coronavirus, il COVID-19, e altre malattie  
4 infettive, e i fattori ad esse potenzialmente correlati. Se hai più di 18 anni e sei in grado di rispondere al sondaggio in  
5 italiano, puoi cominciare qui sotto!  
6  
7

8  
9 Language \_\_\_\_\_  
10  
11  
12  
13  
14  
15  
16  
17  
18  
19  
20  
21  
22  
23  
24  
25  
26  
27  
28  
29  
30  
31  
32  
33  
34  
35  
36  
37  
38  
39  
40  
41  
42  
43  
44  
45  
46  
47  
48  
49  
50  
51  
52  
53  
54  
55  
56  
57  
58  
59  
60

For peer review only

SCHOOL OF MEDICINE AND DENTISTRY

Department of Obstetrics & Gynecology



### Sondaggio globale sul coronavirus: opinioni e modalità d'intervento

**Sperimentatori principali:** Timothy Dye, PhD ed Eva Pressman, MD

Il presente modulo è parte di uno studio sperimentale condotto da alcuni membri del corpo docente della Facoltà di Medicina e Odontoiatria dell'Università di Rochester.

Lo scopo di questo studio è raggiungere una migliore comprensione delle opinioni, convinzioni e conoscenze relative ad alcune tematiche legate alle attuali questioni di sanità pubblica, come il coronavirus e altre malattie infettive, e i fattori ad esse potenzialmente correlati. Lo studio include domande sulle tue opinioni ed esperienze riguardo al coronavirus e al COVID-19, alla salute fisica e mentale, allo stress e al sostegno sociale, oltre a domande demografiche. Puoi saltare tutte le domande che vuoi.

Se decidi di partecipare a questo studio, sarai invitato a completare un sondaggio accessibile su internet attraverso un link. Per completare il questionario ci vorranno circa 20–40 minuti. Secondo le nostre stime, saranno circa 7000 le persone che prenderanno parte a questo studio.

I rischi legati alla partecipazione sono minimi. Alcune domande potrebbero turbarti o risultare imbarazzanti. Sei libero di saltare tutte le domande alle quali non desideri rispondere. Per proteggere la riservatezza dei dati, le risposte saranno trasmesse in formato crittografato (leggibile solo dal personale autorizzato). Non sono previste indennità.

Non riceverai alcun compenso per la partecipazione a questo sondaggio.

L'Università di Rochester farà tutto il possibile per mantenere confidenziali le informazioni raccolte. I risultati della ricerca potranno essere presentati in convegni o pubblicazioni, sempre mantenendo nascosta l'identità delle singole persone che hanno risposto.

**La tua partecipazione allo studio è assolutamente volontaria.** Sei libero di non partecipare e puoi ritirarti in qualsiasi momento. Se decidi di interrompere la compilazione, non sarà per noi possibile eliminare le informazioni già acquisite, poiché non saremmo in grado di rintracciare ed eliminare le risposte da te fornite dal momento che non raccogliamo alcun dato personale.

L'Università di Rochester sta ricevendo un pagamento dalla Mae Stone Goode Foundation per aver condotto questo studio di ricerca.

Per ulteriori informazioni o domande su questa ricerca puoi rivolgerti al Dr. Timothy Dye, e-mail [tim\\_dye@urmc.rochester.edu](mailto:tim_dye@urmc.rochester.edu).

Sei pregato di contattare il Comitato etico per la ricerca dell'Università di Rochester: University of Rochester Research Subjects Review Board, 265 Crittenden Blvd., CU 420315, Rochester, NY 14642, Telefono +1 (585) 276-0005 o +1 (877) 449-4441 nel caso tu avessi l'esigenza:

- di parlare con una persona indipendente dal gruppo di ricerca riguardo ai tuoi diritti in quanto partecipante alla ricerca;
- di esprimere dubbi sulla ricerca.

RSRB STUDY00004825  
Version Date: April 28, 2020

RSRB Approval Date: 4/28/2020

1 Sondaggio globale sul coronavirus: opinioni e modalità d'intervento

2  
3 Sperimentatori principali: Timothy Dye, PhD ed Eva Pressman, MD

4  
5  
6  
7 Il presente modulo è parte di uno studio sperimentale condotto da alcuni membri del corpo docente della Facoltà di  
8 Medicina e Odontoiatria dell'Università di Rochester.

9  
10 Lo scopo di questo studio è raggiungere una migliore comprensione delle opinioni, convinzioni e conoscenze relative  
11 ad alcune tematiche legate alle attuali questioni di sanità pubblica, come il coronavirus e altre malattie infettive, e i  
12 fattori ad esse potenzialmente correlati. Lo studio include domande sulle tue opinioni ed esperienze riguardo al  
13 coronavirus e al COVID-19, alla salute fisica e mentale, allo stress e al sostegno sociale, oltre a domande  
14 demografiche. Puoi saltare tutte le domande che vuoi.

15 Se decidi di partecipare a questo studio, sarai invitato a completare un sondaggio accessibile su internet attraverso  
16 un link. Per completare il questionario ci vorranno circa 15-25 minuti. Secondo le nostre stime, saranno circa 7000 le  
17 persone che prenderanno parte a questo studio.

18  
19 I rischi legati alla partecipazione sono minimi. Alcune domande potrebbero turbarti o risultare imbarazzanti. Sei  
20 libero di saltare tutte le domande alle quali non desideri rispondere. Per proteggere la riservatezza dei dati, le  
21 risposte saranno trasmesse in formato crittografato (leggibile solo dal personale autorizzato). Non sono previste  
22 indennità.

23  
24 Non riceverai alcun compenso per la partecipazione a questo sondaggio.

25  
26 L'Università di Rochester farà tutto il possibile per mantenere confidenziali le informazioni raccolte. I risultati della  
27 ricerca potranno essere presentati in convegni o pubblicazioni, sempre mantenendo nascosta l'identità delle singole  
28 persone che hanno risposto.

29  
30 La tua partecipazione allo studio è assolutamente volontaria. Sei libero di non partecipare e puoi ritirarti in qualsiasi  
31 momento. Se decidi di interrompere la compilazione, non sarà per noi possibile eliminare le informazioni già  
32 acquisite, poiché non saremmo in grado di rintracciare ed eliminare le risposte da te fornite dal momento che non  
33 raccogliamo alcun dato personale.

34 L'Università di Rochester sta ricevendo un pagamento dalla Mae Stone Goode Foundation per aver condotto questo  
35 studio di ricerca.

36  
37 Per ulteriori informazioni o domande su questa ricerca puoi rivolgerti al Dr. Timothy Dye, e-mail  
38 tim\_dye@urmc.rochester.edu.

39  
40 Sei pregato di contattare il Comitato etico per la ricerca dell'Università di Rochester: University of Rochester  
41 Research Subjects Review Board, 265 Crittenden Blvd., CU 420315, Rochester, NY 14642, Telefono +1 (585)  
42 276-0005 o + 1 (877) 449-4441 nel caso tu avessi l'esigenza:

43  
44 di parlare con una persona indipendente dal gruppo di ricerca riguardo ai tuoi diritti in quanto partecipante alla  
45 ricerca; di esprimere dubbi sulla ricerca.

46  
47  
48  
49  
50 Vuoi cominciare il sondaggio?

- 51  Sì  
52  No  
53  
54  
55  
56  
57  
58  
59  
60

1 **Sezione 1: domande sulla nazionalità**

2  
3  
4  
5  
6  
7  
8  
9  
10  
11  
12  
13  
14  
15  
16  
17  
18  
19  
20  
21  
22  
23  
24  
25  
26  
27  
28  
29  
30  
31  
32  
33  
34  
35  
36  
37  
38  
39  
40  
41  
42  
43  
44  
45  
46  
47  
48  
49  
50  
51  
52  
53  
54  
55  
56  
57  
58  
59  
60

For peer review only

1 1. In quale paese vivi?  
2  
3  
4  
5  
6  
7  
8  
9  
10  
11  
12  
13  
14  
15  
16  
17  
18  
19  
20  
21  
22  
23  
24  
25  
26  
27  
28  
29  
30  
31  
32  
33  
34  
35  
36  
37  
38  
39  
40  
41  
42  
43  
44  
45  
46  
47  
48  
49  
50  
51  
52  
53  
54  
55  
56  
57  
58  
59  
60

- afghanistan
- Albania
- algeria
- andorra
- angola
- anguilla
- Antartide [a]
- Antigua e Barbuda
- Arabia saudita
- Argentina
- Armenia
- aruba
- Australia [b]
- Austria
- Azerbaijan
- Bahamas (la)
- Bahrain
- bangladesh
- barbados
- Belgio
- Belize
- benin
- Bhutan
- Bielorussia
- Bolivia (stato plurinazionale di)
- Bonaire
- Bosnia ed Erzegovina
- Botswana
- Brasile
- Brunei Darussalam [e]
- Bulgaria
- Burkina Faso
- burundi
- Cambogia
- Camerun
- Canada
- Capo Verde [f]
- chad
- chile
- Cipro
- Cocos (Keeling) Islands (the)
- Colombia
- Comore (las)
- Congo (Repubblica Democratica del)
- Congo (the) [g]
- Corea (Repubblica democratica popolare di) [o]
- Corea (Repubblica di) [p]
- Costa d'Avorio [h]
- Costa Rica
- Croazia
- Cuba
- Curagao
- Danimarca
- dominica
- Ecuador
- Egitto
- El Salvador
- Emirati Arabi Uniti (el)
- eritrea
- Estonia
- Eswatini [j]
- Etiopia
- fiji
- Filippine (il)
- Finlandia
- Francia [l]
- French Southern Territories (the) [m]
- Gabon
- Gambia

1  
2  
3  
4  
5  
6  
7  
8  
9  
10  
11  
12  
13  
14  
15  
16  
17  
18  
19  
20  
21  
22  
23  
24  
25  
26  
27  
28  
29  
30  
31  
32  
33  
34  
35  
36  
37  
38  
39  
40  
41  
42  
43  
44  
45  
46  
47  
48  
49  
50  
51  
52  
53  
54  
55  
56  
57  
58  
59  
60

- Georgia
- Georgia del Sud e Isole Sandwich Meridionali
- Germania
- Ghana
- Giamaica
- Giappone
- Gibilterra
- Gibuti
- Giordania
- Granada
- Grecia
- Groenlandia
- Guadalupe
- guam
- Guatemala
- Guiana
- Guinea
- Guinea Equatoriale
- Guinea-Bissau
- Guyana francese
- Honduras
- Hong Kong
- incontro
- India
- Indonesia
- Iran (Repubblica islamica di)
- Iraq
- Irlanda
- Islanda
- Isola Bouvet
- Isola di Ascencion
- Isola di Man
- Isola di natale
- Isola Norfolk
- Isole Aland
- Isole Bermuda
- Isole Cayman
- Isole Cook
- Isole Falkland (the) [Falklands] [k]
- Isole Faroe
- Isole Heard e McDonald
- Isole Marianne Settentrionali
- Isole Marshall
- Isole minori esterne degli Stati Uniti (the) [ac]
- Isole Salomone
- Isole Turks e Caicos (Ia)
- Isole Vergini (USA,) [Ag]
- Isole Vergini britanniche [af]
- Israele
- Italia
- Jan Mayen
- Kazakistan
- Kenia
- Kiribati
- Kuwait
- Kirgizstan
- Lesoto
- Lettonia
- Libano
- Liberia
- Libia
- Liechtenstein
- Lituania
- Lussemburgo
- Macao [r]
- Macedonia settentrionale [s]
- Madagascar
- maglia
- maglione
- malawi
- Malaysia



1  
2  
3  
4  
5  
6  
7  
8  
9  
10  
11  
12  
13  
14  
15  
16  
17  
18  
19  
20  
21  
22  
23  
24  
25  
26  
27  
28  
29  
30  
31  
32  
33  
34  
35  
36  
37  
38  
39  
40  
41  
42  
43  
44  
45  
46  
47  
48  
49  
50  
51  
52  
53  
54  
55  
56  
57  
58  
59  
60

- Maldive
- mali
- Malta
- Marocco
- Martinique
- Mauricio
- Mauritania
- mayotte
- Messico
- Micronesia (Stati Federati di)
- Moldavia (Repubblica di)
- Monaco
- Mongolia
- montenegro
- montserrat
- Mozambico
- Myanmar [t]
- Namibia
- nauru
- Nepal
- Nicaragua
- Niger (la)
- Nigeria
- Niue
- Norvegia
- Nuova Caledonia
- Nuova Zelanda
- Oman
- Paesi Bassi (la)
- Pakistan
- Palau
- Palestina, Stato di
- Panama
- Papua Nuova Guinea
- Paraguay
- Perù
- Pitcairn [u]
- Polinesia Francese
- Polonia
- porcellana
- Portogallo
- Puerto Rico
- Qatar
- Regno Unito di Gran Bretagna e Irlanda del Nord (il)
- Repubblica araba siriana (la) [x]
- Repubblica Ceca [i]
- Repubblica Centrafricana
- Repubblica Democratica Popolare del Laos (la) [q]
- Repubblica Dominicana
- Romania
- Ruanda
- Russian Federation (the) [v]
- Saba
- Sahara occidentale [ah]
- Saint Kitts e Nevis
- Saint Martin (parte francese)
- Saint Pierre e Miquelon
- Saint Vincent e Grenadine
- samoa
- Samoa americane
- San Bartolomeo
- San Marino
- Sant'Elena
- Sant'Eustachio
- Santa Lucia
- Santa Sede (il) [n]
- Sao Tome e Principe
- Senegal
- Serbia
- Seychelles

- 1  
2  
3  
4  
5  
6  
7  
8  
9  
10  
11  
12  
13  
14  
15  
16  
17  
18  
19  
20  
21  
22  
23  
24  
25  
26  
27  
28  
29  
30  
31  
32  
33  
34  
35  
36  
37  
38  
39  
40  
41
- Sierra Leone
  - Singapore
  - Sint Maarten (parte olandese)
  - Slovacchia
  - Slovenia
  - Somalia
  - Spagna
  - Sri Lanka
  - Stati Uniti d'America (the)
  - Sudafrica
  - Sudan (la)
  - Sudan del sud
  - Suriname
  - Svalbard
  - Svezia
  - Svizzera
  - Taiwan (Provincia della Cina) [e]
  - Tajikistan
  - Tanzania, Repubblica unita di
  - Territorio britannico dell'Oceano Indiano (el)
  - Thailandia
  - Timor Est [aa]
  - togo
  - Tokelau
  - tonga
  - Trinidad e Tobago
  - Tristan da Cunha
  - Tunisia
  - Turchia
  - Turkmenistan
  - Tuvalu
  - Ucraina
  - Uganda
  - Ungheria
  - Uruguay
  - Uzbekistan
  - Vanuatu
  - Venezuela (Repubblica Bolivariana di)
  - Vietnam [ae]
  - Wallis e Futuna
  - yemen
  - Zambia
  - Zimbabwe
  - Altro

42  
43  
44  
45  
46  
47  
48  
49  
50  
51  
52  
53  
54  
55  
56  
57  
58  
59  
60

---

Se risiedi in un altro paese, per favore specifica quale

---

1 1b. Se sei residente negli Stati Uniti, in quale stato  
2 vivi?  
3

- 4  New York
- 5  Alabama
- 6  Alaska
- 7  Arizona
- 8  Arkansas
- 9  California
- 10  Colorado
- 11  Connecticut
- 12  Delaware
- 13  Florida
- 14  Georgia
- 15  Hawaii
- 16  Idaho
- 17  Illinois
- 18  Indiana
- 19  Iowa
- 20  Kansas
- 21  Kentucky
- 22  Louisiana
- 23  Maine
- 24  Maryland
- 25  Massachusetts
- 26  Michigan
- 27  Minnesota
- 28  Mississippi
- 29  Missouri
- 30  Montana
- 31  Nebraska
- 32  Nevada
- 33  New Hampshire
- 34  New Jersey
- 35  New Mexico
- 36  North Carolina
- 37  North Dakota
- 38  Ohio
- 39  Oklahoma
- 40  Oregon
- 41  Pennsylvania
- 42  Rhode Island
- 43  South Carolina
- 44  South Dakota
- 45  Tennessee
- 46  Texas
- 47  Utah
- 48  Vermont
- 49  Virginia
- 50  Washington
- 51  West Virginia
- 52  Wisconsin
- 53  Wyoming

For peer review only

1c. Se risiedi in India, in quale stato vivi?

- IN-AP = Andhra Pradesh
- IN-AR = Arunachal Pradesh
- IN-AS = Assam
- IN-BR = Bihar
- IN-CT = Chhattisgarh
- IN-GA = Goa
- IN-GJ = Gujarat
- IN-HR = Haryana
- IN-HP = Himachal Pradesh
- IN-JH = Jharkhand
- IN-KA = Karnataka
- IN-KL = Kerala
- IN-MP = Madhya Pradesh
- IN-MH = Maharashtra
- IN-MN = Manipur
- IN-ML = Meghalaya
- IN-MZ = Mizoram
- IN-NL = Nagaland
- IN-OR = Odisha
- IN-PB = Punjab
- IN-RJ = Rajasthan
- IN-SK = Sikkim
- IN-TN = Tamil Nadu
- IN-TG = Telangana
- IN-TR = Tripura
- IN-UT = Uttarakhand
- IN-UP = Uttar Pradesh
- IN-WB = West Bengal
- IN-AN = Andaman and Nicobar Islands
- IN-CH = Chandigarh
- IN-DN = Dadra and Nagar Haveli
- IN-DD = Daman and Diu
- IN-DL = Delhi
- IN-JK = Jammu and Kashmir
- IN-LA = Ladakh
- IN-LD = Lakshadweep
- IN-PY = Puducherry

1 2. In quale paese sei nato?

- 2  afghanistan
- 3  Albania
- 4  algeria
- 5  andorra
- 6  angola
- 7  anguilla
- 8  Antartide [a]
- 9  Antigua e Barbuda
- 10  Arabia saudita
- 11  Argentina
- 12  Armenia
- 13  aruba
- 14  Australia [b]
- 15  Austria
- 16  Azerbaijan
- 17  Bahamas (la)
- 18  Bahrain
- 19  bangladesh
- 20  barbados
- 21  Belgio
- 22  Belize
- 23  benin
- 24  Bhutan
- 25  Bielorussia
- 26  Bolivia (stato plurinazionale di)
- 27  Bonaire
- 28  Bosnia ed Erzegovina
- 29  Botswana
- 30  Brasile
- 31  Brunei Darussalam [e]
- 32  Bulgaria
- 33  Burkina Faso
- 34  burundi
- 35  Cambogia
- 36  Camerun
- 37  Canada
- 38  Capo Verde [f]
- 39  chad
- 40  chile
- 41  Cipro
- 42  Cocos (Keeling) Islands (the)
- 43  Colombia
- 44  Comore (las)
- 45  Congo (Repubblica Democratica del)
- 46  Congo (the) [g]
- 47  Corea (Repubblica democratica popolare di) [o]
- 48  Corea (Repubblica di) [p]
- 49  Costa d'Avorio [h]
- 50  Costa Rica
- 51  Croazia
- 52  Cuba
- 53  Curagao
- 54  Danimarca
- 55  dominica
- 56  Ecuador
- 57  Egitto
- 58  El Salvador
- 59  Emirati Arabi Uniti (el)
- 60  eritrea
- Estonia
- Eswatini [j]
- Etiopia
- fiji
- Filippine (il)
- Finlandia
- Francia [l]
- French Southern Territories (the) [m]
- Gabon
- Gambia

1  
2  
3  
4  
5  
6  
7  
8  
9  
10  
11  
12  
13  
14  
15  
16  
17  
18  
19  
20  
21  
22  
23  
24  
25  
26  
27  
28  
29  
30  
31  
32  
33  
34  
35  
36  
37  
38  
39  
40  
41  
42  
43  
44  
45  
46  
47  
48  
49  
50  
51  
52  
53  
54  
55  
56  
57  
58  
59  
60

- Georgia
- Georgia del Sud e Isole Sandwich Meridionali
- Germania
- Ghana
- Giamaica
- Giappone
- Gibilterra
- Gibuti
- Giordania
- Granada
- Grecia
- Groenlandia
- Guadalupe
- guam
- Guatemala
- Guiana
- Guinea
- Guinea Equatoriale
- Guinea-Bissau
- Guyana francese
- Honduras
- Hong Kong
- incontro
- India
- Indonesia
- Iran (Repubblica islamica di)
- Iraq
- Irlanda
- Islanda
- Isola Bouvet
- Isola di Ascencion
- Isola di Man
- Isola di natale
- Isola Norfolk
- Isole Aland
- Isole Bermuda
- Isole Cayman
- Isole Cook
- Isole Falkland (the) [Falklands] [k]
- Isole Faroe
- Isole Heard e McDonald
- Isole Marianne Settentrionali
- Isole Marshall
- Isole minori esterne degli Stati Uniti (the) [ac]
- Isole Salomone
- Isole Turks e Caicos (Ia)
- Isole Vergini (USA,) [Ag]
- Isole Vergini britanniche [af]
- Israele
- Italia
- Jan Mayen
- Kazakistan
- Kenia
- Kiribati
- Kuwait
- Kirgizstan
- Lesoto
- Lettonia
- Libano
- Liberia
- Libia
- Liechtenstein
- Lituania
- Lussemburgo
- Macao [r]
- Macedonia settentrionale [s]
- Madagascar
- maglia
- magione
- malawi
- Malaysia

- 1  Maldive
- 2  mali
- 3  Malta
- 4  Marocco
- 5  Martinique
- 6  Mauricio
- 7  Mauritania
- 8  mayotte
- 9  Messico
- 10  Micronesia (Stati Federati di)
- 11  Moldavia (Repubblica di)
- 12  Monaco
- 13  Mongolia
- 14  montenegro
- 15  montserrat
- 16  Mozambico
- 17  Myanmar [t]
- 18  Namibia
- 19  nauru
- 20  Nepal
- 21  Nicaragua
- 22  Niger (la)
- 23  Nigeria
- 24  Niue
- 25  Norvegia
- 26  Nuova Caledonia
- 27  Nuova Zelanda
- 28  Oman
- 29  Paesi Bassi (la)
- 30  Pakistan
- 31  Palau
- 32  Palestina, Stato di
- 33  Panama
- 34  Papua Nuova Guinea
- 35  Paraguay
- 36  Perù
- 37  Pitcairn [u]
- 38  Polinesia Francese
- 39  Polonia
- 40  porcellana
- 41  Portogallo
- 42  Puerto Rico
- 43  Qatar
- 44  Regno Unito di Gran Bretagna e Irlanda del Nord (il)
- 45  Repubblica araba siriana (la) [x]
- 46  Repubblica Ceca [i]
- 47  Repubblica Centrafricana
- 48  Repubblica Democratica Popolare del Laos (la) [q]
- 49  Repubblica Dominicana
- 50  Romania
- 51  Ruanda
- 52  Russian Federation (the) [v]
- 53  Saba
- 54  Sahara occidentale [ah]
- 55  Saint Kitts e Nevis
- 56  Saint Martin (parte francese)
- 57  Saint Pierre e Miquelon
- 58  Saint Vincent e Grenadine
- 59  samoa
- 60  Samoa americane
- San Bartolomeo
- San Marino
- Sant'Elena
- Sant'Eustachio
- Santa Lucia
- Santa Sede (il) [n]
- Sao Tome e Principe
- Senegal
- Serbia
- Seychelles

- Sierra Leone
- Singapore
- Sint Maarten (parte olandese)
- Slovacchia
- Slovenia
- Somalia
- Spagna
- Sri Lanka
- Stati Uniti d'America (the)
- Sudafrica
- Sudan (la)
- Sudan del sud
- Suriname
- Svalbard
- Svezia
- Svizzera
- Taiwan (Provincia della Cina) [e]
- Tajikistan
- Tanzania, Repubblica unita di
- Territorio britannico dell'Oceano Indiano (el)
- Thailandia
- Timor Est [aa]
- togo
- Tokelau
- tonga
- Trinidad e Tobago
- Tristan da Cunha
- Tunisia
- Turchia
- Turkmenistan
- Tuvalu
- Ucraina
- Uganda
- Ungheria
- Uruguay
- Uzbekistan
- Vanuatu
- Venezuela (Repubblica Bolivariana di)
- Vietnam [ae]
- Wallis e Futuna
- yemen
- Zambia
- Zimbabwe
- Altro

---

Se sei nato in un altro paese, per favore specifica quale

---



**Sezione 2: Opinioni riguardo alla salute**

Ciascuna delle affermazioni sotto riportate rappresenta una tua convinzione relativa alla tua salute, riguardo alla quale puoi esprimere il tuo grado di accordo o disaccordo. Questa è una misura delle tue idee personali; non ci sono risposte giuste o sbagliate. Ti invitiamo a esprimere il tuo grado di accordo o disaccordo con ciascuna delle affermazioni sotto riportate.

|                                                                                                                 | Per niente d'accordo  | Poco d'accordo        | Mediamente d'accordo  | D'accordo             | Molto d'accordo       |
|-----------------------------------------------------------------------------------------------------------------|-----------------------|-----------------------|-----------------------|-----------------------|-----------------------|
| 1. Se mi ammalo, sarà il mio comportamento a determinare quanto tempo mi occorrerà per tornare in salute.       | <input type="radio"/> |
| 2. Indipendentemente da quello che faccio, se devo ammalarmi, mi ammalerò.                                      | <input type="radio"/> |
| 3. Fissare controlli regolari con il mio medico è il modo migliore per evitare di ammalarmi.                    | <input type="radio"/> |
| 4. La maggior parte delle cose che incidono sulla mia salute capitano per caso.                                 | <input type="radio"/> |
| 5. Ogni volta che non mi sento bene, ritengo giusto consultare un professionista specializzato in campo medico. | <input type="radio"/> |
| 6. Sono io che ho il controllo sulla mia salute.                                                                | <input type="radio"/> |
| 7. Per molti versi, il fatto che io possa ammalarmi o rimanere sano dipende dalla mia famiglia.                 | <input type="radio"/> |
| 8. Quando mi ammalo, è per colpa mia.                                                                           | <input type="radio"/> |
| 9. La velocità con cui mi ristabilisco da una malattia dipende in gran parte dalla fortuna.                     | <input type="radio"/> |
| 10. Gli operatori sanitari hanno il controllo della mia salute                                                  | <input type="radio"/> |

- 1 11. La mia buona salute è in
- 2 gran parte una questione di
- 3 fortuna.
- 4
- 5 12. Più di ogni altra cosa è ciò
- 6 che faccio ad avere il maggiore
- 7 impatto sulla mia salute.
- 8
- 9
- 10 13. Se ho cura di me stesso,
- 11 posso evitare di ammalarmi.
- 12
- 13 14. Di solito guarisco dalle
- 14 malattie perché altre persone
- 15 (ad esempio medici, infermieri,
- 16 familiari, amici) si sono prese
- 17 cura di me.
- 18
- 19 15. Indipendentemente da ciò
- 20 che faccio, tendo ad ammalarmi
- 21 molto facilmente.
- 22
- 23 16. Se è scritto che resterò sano,
- 24 non mi ammalerò.
- 25
- 26 17. Se farò le cose giuste,
- 27 resterò in salute.
- 28
- 29 18. Per quanto riguarda la mia
- 30 salute, faccio soltanto ciò che mi
- 31 prescrive il mio medico.
- 32
- 33
- 34
- 35
- 36
- 37
- 38
- 39
- 40
- 41
- 42
- 43
- 44
- 45
- 46
- 47
- 48
- 49
- 50
- 51
- 52
- 53
- 54
- 55
- 56
- 57
- 58
- 59
- 60

**Sezione 3 - Convinzioni riguardo al coronavirus**

**1. Per quanto è a tua conoscenza, gli esperti della sanità pubblica hanno raccomandato le seguenti azioni allo scopo di contribuire a rallentare la diffusione del coronavirus?**

|                                                               | Sì, l'hanno consigliato | No, non l'hanno consigliato | Non saprei            |
|---------------------------------------------------------------|-------------------------|-----------------------------|-----------------------|
| a. Lavarsi spesso le mani                                     | <input type="radio"/>   | <input type="radio"/>       | <input type="radio"/> |
| b. Bollire l'acqua prima di berla                             | <input type="radio"/>   | <input type="radio"/>       | <input type="radio"/> |
| c. Le persone sane devono indossare la mascherina in pubblico | <input type="radio"/>   | <input type="radio"/>       | <input type="radio"/> |
| d. Evitare assembramenti con un grande numero di persone      | <input type="radio"/>   | <input type="radio"/>       | <input type="radio"/> |
| e. Utilizzare il repellente per le zanzare                    | <input type="radio"/>   | <input type="radio"/>       | <input type="radio"/> |
| f. Restare a casa se ci si sente male                         | <input type="radio"/>   | <input type="radio"/>       | <input type="radio"/> |
| <hr/>                                                         |                         |                             |                       |
| g. Altre raccomandazioni                                      |                         |                             |                       |

For peer review only

**2. Per quanto è a tua conoscenza, quale delle seguenti modalità contribuisce alla trasmissione o alla diffusione del coronavirus?**

|                                                                                                                           | Sì, si trasmette in questo modo | No, non si trasmette in questo modo | Non saprei            |
|---------------------------------------------------------------------------------------------------------------------------|---------------------------------|-------------------------------------|-----------------------|
| a. Stando in stretta vicinanza fisica con una persona infetta                                                             | <input type="radio"/>           | <input type="radio"/>               | <input type="radio"/> |
| b. Toccando le superfici sulle quali sono presenti piccole quantità di fluidi corporei appartenenti a una persona infetta | <input type="radio"/>           | <input type="radio"/>               | <input type="radio"/> |
| c. Attraverso le punture di zanzara                                                                                       | <input type="radio"/>           | <input type="radio"/>               | <input type="radio"/> |
| d. Attraverso i geni/la genetica                                                                                          | <input type="radio"/>           | <input type="radio"/>               | <input type="radio"/> |

e. In quali altri modi si trasmette o si diffonde il coronavirus? Per piacere, motiva la risposta

---

**3. Per ciascuna delle seguenti voci, indica se la ritieni un sintomo comune dell'infezione da coronavirus (COVID-19)**

|                                     | Sì, è un sintomo      | No, non è un sintomo  | Non saprei            |
|-------------------------------------|-----------------------|-----------------------|-----------------------|
| a. Febbre                           | <input type="radio"/> | <input type="radio"/> | <input type="radio"/> |
| b. Tosse secca                      | <input type="radio"/> | <input type="radio"/> | <input type="radio"/> |
| c. Vomito                           | <input type="radio"/> | <input type="radio"/> | <input type="radio"/> |
| d. Congestione nasale/naso che cola | <input type="radio"/> | <input type="radio"/> | <input type="radio"/> |
| e. Eruzione cutanea                 | <input type="radio"/> | <input type="radio"/> | <input type="radio"/> |

f. Altri sintomi (si prega di descriverli:)

\_\_\_\_\_

For peer review only

1 **4. Ritieni che uno dei seguenti gruppi di persone abbia un rischio maggiore di sviluppare gravi**  
 2 **patologie mediche se viene infettato dal coronavirus?**  
 3

|                                                        | Sì, è a maggior rischio | No, non è a maggior rischio | Non saprei            |
|--------------------------------------------------------|-------------------------|-----------------------------|-----------------------|
| 4 a. Bambini                                           | <input type="radio"/>   | <input type="radio"/>       | <input type="radio"/> |
| 5 b. Donne in gravidanza                               | <input type="radio"/>   | <input type="radio"/>       | <input type="radio"/> |
| 6 c. Persone affette da patologie<br>7 croniche        | <input type="radio"/>   | <input type="radio"/>       | <input type="radio"/> |
| 8 d. Persone che hanno da poco<br>9 superato i 20 anni | <input type="radio"/>   | <input type="radio"/>       | <input type="radio"/> |
| 10 e. Persone obese                                    | <input type="radio"/>   | <input type="radio"/>       | <input type="radio"/> |
| 11 f. Persone oltre i 60 anni                          | <input type="radio"/>   | <input type="radio"/>       | <input type="radio"/> |

12  
 13  
 14  
 15  
 16  
 17 5. Per quanto a tua conoscenza, esiste un vaccino per  
 18 proteggere le persone dall'attuale coronavirus, noto  
 19 anche come COVID-19, oppure no?  Sì  No  Non saprei  
 20

21 6. Per quanto a tua conoscenza, il vaccino contro  
 22 l'influenza o l'influenza stagionale protegge le  
 23 persone dall'attuale coronavirus, noto anche come  
 24 COVID-19, oppure no?  Sì  No  Non saprei  
 25

26 7. Per quanto a tua conoscenza, cosa dovrebbe fare una  
 27 persona che ritenga di aver sviluppato i sintomi del  
 28 coronavirus?  
 29  Restare a casa e chiamare un medico o un operatore  
 30 sanitario  
 31  Cercare immediatamente assistenza sanitaria  
 32 recandosi al pronto soccorso o in una struttura di  
 33 emergenza  
 34  Qualcos'altro  
 35  Non saprei

36 7a. Qualcos'altro, per favore specificare  
 37 \_\_\_\_\_  
 38  
 39  
 40  
 41  
 42  
 43  
 44  
 45  
 46  
 47  
 48  
 49  
 50  
 51  
 52  
 53  
 54  
 55  
 56  
 57  
 58  
 59  
 60

1 **Sezione 4 - Preoccupazioni ed esperienze nell'ambito della salute**

2  
3 1. Pensi di avere informazioni sufficienti sulle  Sì  No  Non saprei  
4 modalità per proteggere te stesso e la tua famiglia  
5 dal coronavirus?  
6

7 2. Che cosa stai facendo per proteggere te stesso e la  
8 tua famiglia dal coronavirus?  
9 \_\_\_\_\_  
10

11 3. Pensi che la preoccupazione o lo stress legati al  Sì - un notevole impatto  
12 coronavirus abbiano avuto un impatto negativo sulla  Sì - un piccolo impatto  
13 tua salute mentale oppure no?  No  
14  Non saprei  
15

16 3b. Per piacere, motiva la risposta:  
17 \_\_\_\_\_  
18  
19  
20  
21  
22  
23  
24  
25  
26  
27  
28  
29  
30  
31  
32  
33  
34  
35  
36  
37  
38  
39  
40  
41  
42  
43  
44  
45  
46  
47  
48  
49  
50  
51  
52  
53  
54  
55  
56  
57  
58  
59  
60

For peer review only

1 **q4. - In che misura ritieni che ciascuna delle seguenti categorie sia intervenuta efficacemente**  
2 **contro il coronavirus e il COVID-19?**  
3

4 a. Il sistema sanitario (compresi ospedali,  
5 ambulatori, medici, infermieri e altri operatori  
6 sanitari)

- Per nulla efficace  
 Non molto efficace  
 Abbastanza efficace  
 Molto efficace

7  
8  
9 a. Per piacere, motiva la risposta:  
10  
11  
12 \_\_\_\_\_

13  
14 b. La comunità scientifica (compresi ricercatori e  
15 analisti)

- Per nulla efficace  
 Non molto efficace  
 Abbastanza efficace  
 Molto efficace

16  
17  
18  
19 b. Per piacere, motiva la risposta:  
20  
21  
22 \_\_\_\_\_

23 c. Il governo (comprese le autorità locali e  
24 regionali)

- Per nulla efficace  
 Non molto efficace  
 Abbastanza efficace  
 Molto efficace

25  
26  
27  
28 c. Per piacere, motiva la risposta:  
29  
30  
31 \_\_\_\_\_

32 d. Il sistema educativo (comprese scuole primarie,  
33 secondarie e università)

- Per nulla efficace  
 Non molto efficace  
 Abbastanza efficace  
 Molto efficace

34  
35  
36  
37 d. Per piacere, motiva la risposta:  
38  
39  
40 \_\_\_\_\_

41  
42 e. Rivenditori al dettaglio e servizi locali (inclusi  
43 negozi, supermercati, ristoranti)

- Per nulla efficace  
 Non molto efficace  
 Abbastanza efficace  
 Molto efficace

44  
45  
46  
47 e. Per piacere, motiva la risposta:  
48  
49  
50 \_\_\_\_\_

51 f. Le imprese (compresi grande industria, fabbriche,  
52 produttori)

- Per nulla efficace  
 Non molto efficace  
 Abbastanza efficace  
 Molto efficace

53  
54  
55  
56 f. Per piacere, motiva la risposta:  
57  
58  
59  
60 \_\_\_\_\_



1 g. La stampa (inclusi giornalisti, quotidiani,  
2 televisione e mezzi di comunicazione visiva)

- 3  Per nulla efficace
- 4  Non molto efficace
- 5  Abbastanza efficace
- 6  Molto efficace

7 g. Per piacere, motiva la risposta:

8 \_\_\_\_\_

11 h. Le piattaforme dei social media

- 12  Per nulla efficace
- 13  Non molto efficace
- 14  Abbastanza efficace
- 15  Molto efficace

16 h. Per piacere, motiva la risposta:

17 \_\_\_\_\_

For peer review only

1  
2  
3  
4  
5  
6  
7  
8  
9  
10  
11  
12  
13  
14  
15  
16  
17  
18  
19  
20  
21  
22  
23  
24  
25  
26  
27  
28  
29  
30  
31  
32  
33  
34  
35  
36  
37  
38  
39  
40  
41  
42  
43  
44  
45  
46  
47  
48  
49  
50  
51  
52  
53  
54  
55  
56  
57  
58  
59  
60

**5. Ammesso che tu sia preoccupato, in quale misura lo sei per ciascuna delle seguenti tematiche?**

|                                                                                                                                                       | Molto preoccupato     | Abbastanza preoccupato | Poco preoccupato      | Per nulla preoccupato | Non saprei            |
|-------------------------------------------------------------------------------------------------------------------------------------------------------|-----------------------|------------------------|-----------------------|-----------------------|-----------------------|
| a. Tu o un membro della tua famiglia potreste contrarre il coronavirus                                                                                | <input type="radio"/> | <input type="radio"/>  | <input type="radio"/> | <input type="radio"/> | <input type="radio"/> |
| b. Subirai una contrazione del reddito perché perderai il posto di lavoro o dovrai fare orari ridotti a causa del coronavirus                         | <input type="radio"/> | <input type="radio"/>  | <input type="radio"/> | <input type="radio"/> | <input type="radio"/> |
| c. Potresti contrarre la malattia di Lyme                                                                                                             | <input type="radio"/> | <input type="radio"/>  | <input type="radio"/> | <input type="radio"/> | <input type="radio"/> |
| d. Il coronavirus avrà un impatto negativo sui tuoi investimenti, per esempio la pensione o i fondi accantonati per gli studi universitari/il college | <input type="radio"/> | <input type="radio"/>  | <input type="radio"/> | <input type="radio"/> | <input type="radio"/> |
| e. Potresti contrarre la febbre dengue                                                                                                                | <input type="radio"/> | <input type="radio"/>  | <input type="radio"/> | <input type="radio"/> | <input type="radio"/> |
| f. Ti esporrai al rischio di contrarre il coronavirus perché non potrai permetterti di restare a casa senza lavorare                                  | <input type="radio"/> | <input type="radio"/>  | <input type="radio"/> | <input type="radio"/> | <input type="radio"/> |
| g. Non potrai permetterti di effettuare il test o i trattamenti per il coronavirus se dovessero rendersi necessari                                    | <input type="radio"/> | <input type="radio"/>  | <input type="radio"/> | <input type="radio"/> | <input type="radio"/> |

h. Se hai ulteriori preoccupazioni, per favore descrivile

---

5b. In quale misura la tua vita è stata sconvolta dall'epidemia di coronavirus, ammesso che lo sia stata?

- Molto  
 Abbastanza  
 Molto poco  
 Per nulla  
 Non saprei

5b. Per favore spiega in quale misura la tua vita è stata sconvolta dall'epidemia di coronavirus, ammesso che lo sia stata?

---

**6. Per favore indica se hai intrapreso una delle seguenti azioni a causa della recente epidemia di coronavirus.**

|                                                                                                                        | Sì                    | No                    | Non saprei            |
|------------------------------------------------------------------------------------------------------------------------|-----------------------|-----------------------|-----------------------|
| a. Ho deciso di annullare i viaggi oppure ho modificato i programmi di viaggio                                         | <input type="radio"/> | <input type="radio"/> | <input type="radio"/> |
| b. Ho acquistato una mascherina protettiva                                                                             | <input type="radio"/> | <input type="radio"/> | <input type="radio"/> |
| c. Ho fatto scorta di prodotti, per esempio alimentari e articoli per la casa                                          | <input type="radio"/> | <input type="radio"/> | <input type="radio"/> |
| d. Ho rimandato o annullato visite mediche                                                                             | <input type="radio"/> | <input type="radio"/> | <input type="radio"/> |
| e. Ho fatto scorta dei farmaci con obbligo di ricetta                                                                  | <input type="radio"/> | <input type="radio"/> | <input type="radio"/> |
| f. Sono rimasto a casa anziché recarmi al lavoro, a scuola o a svolgere le mie abituali attività                       | <input type="radio"/> | <input type="radio"/> | <input type="radio"/> |
| g. Ho rimandato o annullato un intervento medico o un'operazione chirurgica                                            | <input type="radio"/> | <input type="radio"/> | <input type="radio"/> |
| h. Ho annullato i progetti di partecipare a eventi in luoghi affollati, per esempio concerti o manifestazioni sportive | <input type="radio"/> | <input type="radio"/> | <input type="radio"/> |
| i. Mi sono licenziato                                                                                                  | <input type="radio"/> | <input type="radio"/> | <input type="radio"/> |

6b. Per favore, aggiungi qualsiasi ulteriore spiegazione o dettaglio riguardo alle voci sopra elencate

**7. Hai vissuto una delle seguenti esperienze a causa del coronavirus?**

7a. Ho perduto gli introiti derivanti da un lavoro o un'attività  Sì  
 No  
 Non saprei

a. Ho perduto gli introiti derivanti da un lavoro o un'attività, per favore specifica

7b. Non sono riuscito a procurarmi prodotti alimentari  Sì  
 No  
 Non saprei

b. Non sono riuscito a procurarmi prodotti alimentari, per favore specifica

7c. Non sono riuscito a procurarmi prodotti per la pulizia o igienizzante per le mani  Sì  
 No  
 Non saprei

7c. Non sono riuscito a procurarmi prodotti per la pulizia o igienizzante per le mani, per favore specifica

7d. Non sono riuscito a procurarmi i farmaci con obbligo di prescrizione  Sì  
 No  
 Non saprei

d. Non sono riuscito a procurarmi i farmaci con obbligo di prescrizione, per favore specifica

7e. Uno dei membri della tua famiglia è stato molestato, maltrattato o percosso a causa del coronavirus  Sì  
 No  
 Non saprei

7e. Se vi sono state molestie, maltrattamenti o percosse a causa del coronavirus, per favore specifica

8. Quanto scrupolosamente stai rispettando il distanziamento sociale o fisico, quindi resti a casa e lontano dalle altre persone ogni volta che puoi, oppure ti tieni distante dalle altre persone quando sei in un luogo pubblico?  Molto scrupolosamente  
 Abbastanza scrupolosamente  
 Non molto scrupolosamente  
 Non sono per niente scrupoloso

Per favore aggiungi ulteriori commenti sulle tue opinioni ed esperienze di distanziamento sociale o fisico: (domanda aperta)

9. Ti sei sottoposto personalmente al test per il coronavirus oppure no?  Sì, mi sono sottoposto al test  
 No, non mi sono sottoposto al test  
 Non saprei

---

1 9a. Per coloro che si sono sottoposti al test: qual è  
 2 stato il risultato del test per il coronavirus?  
 3  Il test è risultato positivo  
 4  Il test è risultato negativo  
 5  Sono in attesa dell'esito del test

---

6 10. Per coloro che non si sono sottoposti al test: hai  
 7 cercato di sottoposti al test per il coronavirus  
 8 oppure no?  
 9  Sì  
 10  No  
 11  Non saprei

---

12 11. Per coloro che non si sono sottoposti al test:  
 13 pensi che riusciresti a sottoposti al test per il  
 14 coronavirus nel caso in cui ritenessi di averne  
 15 bisogno oppure no?  
 16  Sì  
 17  No  
 18  Non saprei

---

19 11. Per favore spiega i motivi per cui non pensi che  
 20 riusciresti a sottoposti al test per il coronavirus  
 21 nel caso in cui ritenessi di averne bisogno  
 22 \_\_\_\_\_

---

23 No translation provided  
 24 \_\_\_\_\_

---

25 12. Ritieni di avere attualmente - o di aver  
 26 recentemente contratto - l'infezione da coronavirus?  
 27  Sì  
 28  No  
 29  Non saprei

---

30 Per favore spiega i motivi per cui ritieni di avere  
 31 attualmente - o di aver recentemente contratto -  
 32 l'infezione da coronavirus  
 33 \_\_\_\_\_

---

34 13. Se esistesse un vaccino per impedire che le  
 35 persone si ammalassero a causa del coronavirus, ti  
 36 faresti vaccinare?  
 37  Sì  
 38  No  
 39  Non saprei

---

40 Per favore spiega i motivi per cui ti faresti  
 41 vaccinare se fosse disponibile un vaccino  
 42 \_\_\_\_\_

---

43 Per favore spiega i motivi per cui non ti faresti  
 44 vaccinare se fosse disponibile un vaccino  
 45 \_\_\_\_\_

---

46 Per favore spiega i motivi per cui non sai se ti  
 47 faresti vaccinare se fosse disponibile un vaccino  
 48 \_\_\_\_\_

---

49 14. Conosci personalmente qualcuno che ha contratto  
 50 l'infezione da coronavirus (o COVID-19) spunta tutte  
 51 le voci pertinenti  
 52  Sì, un membro della mia famiglia  
 53  Sì, un amico  
 54  Sì, un vicino di casa  
 55  Sì, qualcun'altro  
 56  No  
 57  Non saprei

---

58 15. Conosci personalmente qualcuno che è deceduto  
 59 per aver contratto l'infezione da coronavirus (o  
 60 COVID-19) spunta tutte le voci pertinenti  
 Sì, un membro della mia famiglia  
 Sì, un amico  
 Sì, un vicino di casa  
 Sì, qualcun'altro  
 No  
 Non saprei

1 16. Le persone parlano o spettegolano di coloro che  
2 hanno contratto l'infezione da coronavirus (o  
3 COVID-19), allo stato attuale o in precedenza, o di  
4 coloro che ritengono essere stati infettati?

- Decisamente sì  
 Probabilmente sì  
 Probabilmente no  
 Decisamente no  
 Non saprei

7 17. Le persone che hanno contratto l'infezione da  
8 coronavirus (o COVID-19) perdono il rispetto o la  
9 considerazione sociale nella loro comunità?

- Decisamente sì  
 Probabilmente sì  
 Probabilmente no  
 Decisamente no  
 Non saprei

10  
11  
12  
13  
14  
15  
16  
17  
18  
19  
20  
21  
22  
23  
24  
25  
26  
27  
28  
29  
30  
31  
32  
33  
34  
35  
36  
37  
38  
39  
40  
41  
42  
43  
44  
45  
46  
47  
48  
49  
50  
51  
52  
53  
54  
55  
56  
57  
58  
59  
60

For peer review only

**Sezione 5 - Domande sul nucleo familiare**

- 1  
2  
3  
4  
5  
6 1. Hai un'automobile di proprietà  Sì  
7  No  
8  Preferisco non rispondere
- 
- 9  
10 2. Hai una casa di proprietà  Sì  
11  No  
12  Preferisco non rispondere
- 
- 13  
14 3. Sei il genitore o il tutore di un minore di età  
15 inferiore a 18 anni che vive nel tuo nucleo  
16 familiare?  Sì  
17  No  
18  Non saprei
- 
- 19 4. La scuola o l'asilo di tuo figlio sono stati chiusi  
20 per alcuni periodi di tempo in conseguenza del  
21 coronavirus oppure no?  Sì  
22  No  
23  Non saprei
- 
- 24 5. Se la scuola o l'asilo di tuo figlio sono  
25 stati/venissero chiusi per due settimane o più in  
26 conseguenza del coronavirus, quanto è stato/sarebbe  
27 difficile per te trovare un modo alternativo per  
28 occuparti dei bambini?  Molto difficile  
29  Un poco difficile  
30  Non molto difficile  
31  Per nulla difficile
- 
- 32 6. Se fossi costretto a restare a casa per la  
33 quarantena oppure perché le scuole o i posti di  
34 lavoro sono chiusi, potresti riuscire a svolgere,  
35 almeno in parte, il tuo lavoro da casa oppure no?  Sì  
36  No  
37  Non applicabile  
38  Non saprei
- 
- 39 6. Per favore spiega in quale modo potresti svolgere  
40 almeno una parte del tuo lavoro restando a casa  
41 \_\_\_\_\_
- 
- 42 6. Per favore spiega come mai ti sarebbe impossibile  
43 svolgere almeno una parte del tuo lavoro restando a  
44 casa \_\_\_\_\_
- 
- 45 7. Tu o uno dei membri del tuo nucleo familiare  
46 lavora in un ambiente che eroga assistenza sanitaria,  
47 per esempio uno studio medico, un ambulatorio, un  
48 ospedale, una casa di riposo o uno studio  
49 odontoiatrico? (spunta tutte le voci pertinenti)  Sì, io  
50  Sì, un membro della mia famiglia  
51  No, nessuno  
52  Non saprei
- 
- 53 8. Quante persone di età inferiore a 18 anni vivono  
54 attualmente nel tuo nucleo familiare? \_\_\_\_\_
- 
- 55 9. Quanti adulti di età superiore a 18 anni vivono  
56 attualmente nel tuo nucleo familiare, compreso tu  
57 stesso? \_\_\_\_\_
- 
- 58 10. Sei tu la persona che ha la responsabilità di  
59 occuparsi dei figli?  Sì  
60  No  
 Non saprei

1 11. Hai la responsabilità di assistere persone  
2 anziane?

- Sì  
 No  
 Non saprei

3  
4  
5 12. Per favore, inserisci alcune informazioni relative  
6 alla tua rete di sostegno sociale (amici, famigliari,  
7 vicini di casa):  
8 \_\_\_\_\_  
9  
10  
11  
12  
13  
14  
15  
16  
17  
18  
19  
20  
21  
22  
23  
24  
25  
26  
27  
28  
29  
30  
31  
32  
33  
34  
35  
36  
37  
38  
39  
40  
41  
42  
43  
44  
45  
46  
47  
48  
49  
50  
51  
52  
53  
54  
55  
56  
57  
58  
59  
60

For peer review only



**Sezione 6: Stress nell'ultimo mese**

|                                                                                                                                                                      | Mai                   | Quasi mai             | Talvolta              | Spesso                | Molto spesso          |
|----------------------------------------------------------------------------------------------------------------------------------------------------------------------|-----------------------|-----------------------|-----------------------|-----------------------|-----------------------|
| 1. Nell'ultimo mese, con quale frequenza sei rimasto turbato a causa di un evento inaspettato?                                                                       | <input type="radio"/> |
| 2. Nell'ultimo mese, con quale frequenza ti è sembrato di non riuscire a tenere sotto controllo gli aspetti importanti della tua vita?                               | <input type="radio"/> |
| 3. Nell'ultimo mese, con quale frequenza ti sei sentito nervoso e "stressato"?                                                                                       | <input type="radio"/> |
| 4. Nell'ultimo mese, con quale frequenza ti sei sentito sicuro nella gestione dei tuoi problemi personali?                                                           | <input type="radio"/> |
| 5. Nell'ultimo mese, con quale frequenza ti è sembrato che tutto andasse per il verso giusto?                                                                        | <input type="radio"/> |
| 6. Nell'ultimo mese, con quale frequenza ti è sembrato di non avere la forza di affrontare tutte le cose che avevi da fare?                                          | <input type="radio"/> |
| 7. Nell'ultimo mese, con quale frequenza sei riuscito a mantenere sotto controllo le seccature nella tua vita?                                                       | <input type="radio"/> |
| 8. Nell'ultimo mese, con quale frequenza ti è sembrato di avere il controllo della situazione?                                                                       | <input type="radio"/> |
| 9. Nell'ultimo mese, con quale frequenza ti sei arrabbiato a causa di eventi al di fuori del tuo controllo?                                                          | <input type="radio"/> |
| 10. Nell'ultimo mese, con quale frequenza ti è sembrato che le difficoltà si stessero accumulando a un livello tale da pensare che non saresti riuscito a superarle? | <input type="radio"/> |
| 11. Per favore, aggiungi ulteriori informazioni riguardo alle tue sensazioni di stress nel corso dell'ultimo mese                                                    | <hr/>                 |                       |                       |                       |                       |

**Sezione 7: Sostegno sociale**

|                                                                                            | In assoluto<br>disaccordo | Molto in<br>disaccordo | Poco<br>d'accordo     | Indifferente          | Abbastanza<br>d'accordo | Molto<br>d'accordo    | Estrema-<br>mente<br>d'accordo |
|--------------------------------------------------------------------------------------------|---------------------------|------------------------|-----------------------|-----------------------|-------------------------|-----------------------|--------------------------------|
| 1. Posso contare su una persona speciale che è disponibile quando ho bisogno d'aiuto       | <input type="radio"/>     | <input type="radio"/>  | <input type="radio"/> | <input type="radio"/> | <input type="radio"/>   | <input type="radio"/> | <input type="radio"/>          |
| 2. Posso contare su una persona speciale con la quale condividere gioie e dolori.          | <input type="radio"/>     | <input type="radio"/>  | <input type="radio"/> | <input type="radio"/> | <input type="radio"/>   | <input type="radio"/> | <input type="radio"/>          |
| 3. La mia famiglia si adopera lealmente per darmi una mano.                                | <input type="radio"/>     | <input type="radio"/>  | <input type="radio"/> | <input type="radio"/> | <input type="radio"/>   | <input type="radio"/> | <input type="radio"/>          |
| 4. Traggo tutto il sostegno e l'aiuto emozionale di cui ho bisogno dalla mia famiglia.     | <input type="radio"/>     | <input type="radio"/>  | <input type="radio"/> | <input type="radio"/> | <input type="radio"/>   | <input type="radio"/> | <input type="radio"/>          |
| 5. Posso contare su una persona speciale che è per me una grande fonte di conforto.        | <input type="radio"/>     | <input type="radio"/>  | <input type="radio"/> | <input type="radio"/> | <input type="radio"/>   | <input type="radio"/> | <input type="radio"/>          |
| 6. I miei amici si adoperano lealmente per darmi una mano                                  | <input type="radio"/>     | <input type="radio"/>  | <input type="radio"/> | <input type="radio"/> | <input type="radio"/>   | <input type="radio"/> | <input type="radio"/>          |
| 7. Quando le cose vanno male posso contare sui miei amici.                                 | <input type="radio"/>     | <input type="radio"/>  | <input type="radio"/> | <input type="radio"/> | <input type="radio"/>   | <input type="radio"/> | <input type="radio"/>          |
| 8. Posso parlare liberamente dei miei problemi con la mia famiglia.                        | <input type="radio"/>     | <input type="radio"/>  | <input type="radio"/> | <input type="radio"/> | <input type="radio"/>   | <input type="radio"/> | <input type="radio"/>          |
| 9. Posso contare su alcuni amici con i quali condividere gioie e dolori.                   | <input type="radio"/>     | <input type="radio"/>  | <input type="radio"/> | <input type="radio"/> | <input type="radio"/>   | <input type="radio"/> | <input type="radio"/>          |
| 10. Nella mia vita posso contare su una persona speciale che ha a cuore i miei sentimenti. | <input type="radio"/>     | <input type="radio"/>  | <input type="radio"/> | <input type="radio"/> | <input type="radio"/>   | <input type="radio"/> | <input type="radio"/>          |
| 11. La mia famiglia è disposta ad aiutarmi a prendere decisioni.                           | <input type="radio"/>     | <input type="radio"/>  | <input type="radio"/> | <input type="radio"/> | <input type="radio"/>   | <input type="radio"/> | <input type="radio"/>          |
| 12. Posso parlare liberamente dei miei problemi con i miei amici.                          | <input type="radio"/>     | <input type="radio"/>  | <input type="radio"/> | <input type="radio"/> | <input type="radio"/>   | <input type="radio"/> | <input type="radio"/>          |

**Sezione 8 - Domande sulla salute**

1. In generale come definiresti la tua salute

- Eccellente  
 Molto buona  
 Buona  
 Discreta  
 Cagionevole

2. Considerando ora la tua salute fisica, che comprende le malattie fisiche e le lesioni, per quanti giorni degli ultimi 30 non hai goduto di buona salute?

\_\_\_\_\_  
((numero di giorni))

3. Considerando ora la tua salute mentale, che comprende lo stress, la depressione e i problemi emozionali, per quanti giorni degli ultimi 30 non hai goduto di buona salute?

\_\_\_\_\_  
((numero di giorni))

4. All'incirca per quanti giorni degli ultimi 30 la cattiva salute fisica o mentale ti ha impedito di svolgere le tue abituali occupazioni, come prenderti cura di te stesso, lavorare o svolgere attività ricreative?

\_\_\_\_\_  
((numero di giorni))

5. Negli ultimi 12 mesi c'è stata un'occasione nella quale avresti avuto bisogno di assistenza sanitaria (per esempio un consulto medico) e non hai potuto permetterlo per il costo eccessivo?

- Sì  
 No  
 Non saprei

6. Tu o uno dei membri del tuo nucleo familiare soffre di una patologia grave, per esempio pressione alta, cardiopatia, disturbi polmonari, cancro o diabete? (spunta tutte le voci pertinenti)

- Sì, io  
 Sì, un membro della mia famiglia  
 No, nessuno  
 Non saprei

7. Quali delle seguenti voci è pertinente al tuo caso

- Sono attualmente in gravidanza  
 Il mio partner è attualmente in gravidanza  
 Né io né il mio partner siamo attualmente in gravidanza

8. Desidereresti restare incinta o avere un bambino il prossimo anno?

- Sì  
 No  
 Non saprei

**Sezione 9: Social media****1. Quale delle seguenti piattaforme dei social media utilizzi? (Spunta la voce più pertinente per ciascuna)**

|              | Uso quotidiano        | Qualche volta alla settimana | Qualche volta al mese | Raramente             | Mai                   |
|--------------|-----------------------|------------------------------|-----------------------|-----------------------|-----------------------|
| a. Facebook  | <input type="radio"/> | <input type="radio"/>        | <input type="radio"/> | <input type="radio"/> | <input type="radio"/> |
| b. Twitter   | <input type="radio"/> | <input type="radio"/>        | <input type="radio"/> | <input type="radio"/> | <input type="radio"/> |
| c. LinkedIn  | <input type="radio"/> | <input type="radio"/>        | <input type="radio"/> | <input type="radio"/> | <input type="radio"/> |
| d. Instagram | <input type="radio"/> | <input type="radio"/>        | <input type="radio"/> | <input type="radio"/> | <input type="radio"/> |
| e. WhatsApp  | <input type="radio"/> | <input type="radio"/>        | <input type="radio"/> | <input type="radio"/> | <input type="radio"/> |
| f. Snapchat  | <input type="radio"/> | <input type="radio"/>        | <input type="radio"/> | <input type="radio"/> | <input type="radio"/> |
| g. Reddit    | <input type="radio"/> | <input type="radio"/>        | <input type="radio"/> | <input type="radio"/> | <input type="radio"/> |

2. Come è cambiato il tuo modo di usare i social media dall'inizio della pandemia di coronavirus?

- Uso molto di più i social media  
 Uso un poco di più i social media  
 Uso i social media più di prima  
 Non saprei

2b. Per favore spiega in quale maniera è cambiato il tuo modo di usare i social media dall'inizio della pandemia di coronavirus:

\_\_\_\_\_

1 **Sezione 10 - Domande demografiche**

2  
3 1. Quanti anni hai ad oggi?

4 \_\_\_\_\_

5  
6 2. Come descriveresti le tue origini etniche?

7  
8 \_\_\_\_\_

9  
10 4. Ti consideri appartenente a uno dei seguenti  
11 gruppi? (spunta tutte le voci pertinenti)

- 12  Messicano
- 13  Portoricano
- 14  Cubano

15 4a. Se ti consideri appartenente a un'altra etnia  
16 ispanica/latino-americana, diversa da quelle sopra  
17 elencate, per favore specificala:

18 \_\_\_\_\_

19 4b. Non mi considero ispanico né latino-americano

- 20  Vero
- 21  Falso

22 5. Quali delle seguenti voci descrive meglio il tuo  
23 grado di istruzione?

- 24  Non ho finito la scuola superiore
- 25  Ho concluso la scuola superiore, il liceo, oppure  
26 conseguito il diploma da privatista (GED)
- 27  Ho frequentato il college/l'università ma non ho  
28 portato a termine gli studi
- 29  Ho conseguito la laurea in un college/università
- 30  Ho un diploma postlaurea del college/università  
31 (laurea magistrale, PhD, laurea in medicina e  
32 chirurgia, ecc.)

**6. Qual è la tua religione attuale? Spunta tutte le voci pertinenti**

|                               | Sì                    | No                    | Preferisco non rispondere |
|-------------------------------|-----------------------|-----------------------|---------------------------|
| a. Cristiana                  | <input type="radio"/> | <input type="radio"/> | <input type="radio"/>     |
| b. Ebraica (giudaismo)        | <input type="radio"/> | <input type="radio"/> | <input type="radio"/>     |
| c. Musulmana                  | <input type="radio"/> | <input type="radio"/> | <input type="radio"/>     |
| d. Buddista                   | <input type="radio"/> | <input type="radio"/> | <input type="radio"/>     |
| e. Induista                   | <input type="radio"/> | <input type="radio"/> | <input type="radio"/>     |
| f. Ateista (non credo in Dio) | <input type="radio"/> | <input type="radio"/> | <input type="radio"/>     |
| g. Altro                      | <input type="radio"/> | <input type="radio"/> | <input type="radio"/>     |
| h. Non saprei                 | <input type="radio"/> | <input type="radio"/> | <input type="radio"/>     |

6g. Altra religione, per favore specifica

\_\_\_\_\_

7. Se risiedi negli USA, per favore indica la razza/etnia alla quale appartieni (spunta tutte le voci pertinenti)

- Indiano americano o originario dell'Alaska
- Asiatico
- Americano di colore o afroamericano
- Nativo delle Hawaii
- Originario delle isole del Pacifico
- Caucasico
- Altro

7. Se hai selezionato altro, per favore specifica la razza/etnia

\_\_\_\_\_

7. A quale delle seguenti categorie ritieni di appartenere?

- Udente/non sordo
- Duro d'orecchi
- sordo
- Sordo
- Sordocieco

Ai fini del presente studio ti preghiamo di fare riferimento alle seguenti definizioni.

Udente/non sordo: persona priva di disturbi dell'udito

Duro d'orecchi: persona con limitati disturbi dell'udito

sordo: persona non udente

Sordo: persona non udente che aderisce alla Cultura dei non udenti

Sordocieco: persona non udente affetta da parziale o totale cecità

9. Quale delle seguenti voci descrive meglio il genere a cui appartieni:

- Maschio
- Femmina
- Altra opzione

q9. Se hai spuntato la casella altra opzione per descrivere il tuo genere, per favore fornisci una spiegazione:

\_\_\_\_\_

1 10. Ritieni di essere (spunta tutte le voci  
2 pertinenti)

- 3  Eterosessuale
- 4  Gay
- 5  Lesbica
- 6  Bisessuale
- 7  Transgender
- 8  Nessuna delle voci sopra elencate

9 10a. Se hai spuntato la casella nessuna delle voci  
10 sopra elencate, per favore specifica

11 \_\_\_\_\_

12  
13  
14  
15  
16  
17  
18  
19  
20  
21  
22  
23  
24  
25  
26  
27  
28  
29  
30  
31  
32  
33  
34  
35  
36  
37  
38  
39  
40  
41  
42  
43  
44  
45  
46  
47  
48  
49  
50  
51  
52  
53  
54  
55  
56  
57  
58  
59  
60

For peer review only

1 **Sezione 11. Domanda conclusiva**

2  
3 1. Per favore indica qualsiasi tua eventuale ulteriore  
4 riflessione riguardo al coronavirus e al COVID-19

5 \_\_\_\_\_  
6  
7  
8  
9  
10  
11  
12  
13  
14  
15  
16  
17  
18  
19  
20  
21  
22  
23  
24  
25  
26  
27  
28  
29  
30  
31  
32  
33  
34  
35  
36  
37  
38  
39  
40  
41  
42  
43  
44  
45  
46  
47  
48  
49  
50  
51  
52  
53  
54  
55  
56  
57  
58  
59  
60

For peer review only



**Sezione 12: Qualità del sondaggio**

**Desideriamo formulare alcune domande in merito al presente questionario per apportare miglioramenti in futuro. Se hai domande particolari che vorresti porre ti preghiamo di copiare e incollare la tua domanda nella casella di testo.**

1. In generale le domande del presente questionario erano "comprensibili". Ciò significa che non hai dovuto leggere le voci più di una volta per comprendere cosa veniva chiesto.

- Per niente d'accordo  
 Non sono d'accordo  
 Non sono d'accordo né in disaccordo  
 Sono d'accordo  
 Sono molto d'accordo

2. Hai trovato alcune specifiche domande particolarmente difficili da capire? In caso affermativo, per favore specifica (meglio che puoi)

\_\_\_\_\_

3. In generale il significato delle domande era chiaro e immediato

- Per niente d'accordo  
 Non sono d'accordo  
 Non sono d'accordo né in disaccordo  
 Sono d'accordo  
 Sono molto d'accordo

4. Hai trovato qualche domanda specifica il cui significato era poco chiaro? In caso affermativo, per favore specifica (meglio che puoi)

- Sì  No

4a. In caso affermativo, per favore specifica (meglio che puoi)

\_\_\_\_\_

5. Le scale utilizzate per graduare le risposte erano adeguate. Ciò significa che le scale proposte consentivano di rispondere in maniera appropriata.

- Per niente d'accordo  
 Non sono d'accordo  
 Non sono d'accordo né in disaccordo  
 Sono d'accordo  
 Sono molto d'accordo

6. A tuo parere, alcune delle risposte erano scritte in maniera tale da indurti a pensare che ci fosse UNA SOLA risposta OVVIA?

- Sì  
 No

6b. Per favore motiva la risposta

\_\_\_\_\_

Inserisci qualsiasi tuo eventuale ulteriore commento riguardo a questo studio

( )

Per ulteriori informazioni sul coronavirus e sul COVID-19, per favore visita i seguenti siti

<http://www.governo.it/it/coronavirus>

<https://www.who.int/> For peer review only - <http://bmjopen.bmj.com/site/about/guidelines.xhtml>

<https://www.cdc.gov/coronavirus/2019-ncov/index.html>

1 <https://www.cdc.gov/>

2  
3  
4  
5  
6  
7  
8  
9  
10  
11  
12  
13  
14  
15  
16  
17  
18  
19  
20  
21  
22  
23  
24  
25  
26  
27  
28  
29  
30  
31  
32  
33  
34  
35  
36  
37  
38  
39  
40  
41  
42  
43  
44  
45  
46  
47  
48  
49  
50  
51  
52  
53  
54  
55  
56  
57  
58  
59  
60

For peer review only

# Reporting checklist for cross sectional study.

Based on the STROBE cross sectional guidelines.

## Instructions to authors

Complete this checklist by entering the page numbers from your manuscript where readers will find each of the items listed below.

Your article may not currently address all the items on the checklist. Please modify your text to include the missing information. If you are certain that an item does not apply, please write "n/a" and provide a short explanation.

Upload your completed checklist as an extra file when you submit to a journal.

In your methods section, say that you used the STROBE cross sectional reporting guidelines, and cite them as:

von Elm E, Altman DG, Egger M, Pocock SJ, Gøtzsche PC, Vandenbroucke JP. The Strengthening the Reporting of Observational Studies in Epidemiology (STROBE) Statement: guidelines for reporting observational studies.

|                           |                     | Reporting Item                                                                                  | Page Number |
|---------------------------|---------------------|-------------------------------------------------------------------------------------------------|-------------|
| <b>Title and abstract</b> |                     |                                                                                                 |             |
| Title                     | <a href="#">#1a</a> | Indicate the study's design with a commonly used term in the title or the abstract              | 2           |
| Abstract                  | <a href="#">#1b</a> | Provide in the abstract an informative and balanced summary of what was done and what was found | 2           |
| <b>Introduction</b>       |                     |                                                                                                 |             |
| Background / rationale    | <a href="#">#2</a>  | Explain the scientific background and rationale for the investigation being reported            | 3           |
| Objectives                | <a href="#">#3</a>  | State specific objectives, including any prespecified hypotheses                                | 4           |
| <b>Methods</b>            |                     |                                                                                                 |             |
| Study design              | <a href="#">#4</a>  | Present key elements of study design early in the paper                                         | 4           |
| Setting                   | <a href="#">#5</a>  | Describe the setting, locations, and relevant dates, including periods of                       | 5           |

recruitment, exposure, follow-up, and data collection

|    |                      |                      |   |
|----|----------------------|----------------------|---|
| 1  |                      |                      |   |
| 2  |                      |                      |   |
| 3  | Eligibility criteria | <a href="#">#6a</a>  | 6 |
| 4  |                      |                      |   |
| 5  |                      |                      |   |
| 6  |                      | <a href="#">#7</a>   | 6 |
| 7  |                      |                      |   |
| 8  |                      |                      |   |
| 9  |                      |                      |   |
| 10 | Data sources /       | <a href="#">#8</a>   | 6 |
| 11 | measurement          |                      |   |
| 12 |                      |                      |   |
| 13 |                      |                      |   |
| 14 |                      |                      |   |
| 15 |                      |                      |   |
| 16 |                      |                      |   |
| 17 | Bias                 | <a href="#">#9</a>   | 5 |
| 18 |                      |                      |   |
| 19 | Study size           | <a href="#">#10</a>  | 5 |
| 20 |                      |                      |   |
| 21 | Quantitative         | <a href="#">#11</a>  | 7 |
| 22 | variables            |                      |   |
| 23 |                      |                      |   |
| 24 |                      |                      |   |
| 25 | Statistical          | <a href="#">#12a</a> | 7 |
| 26 | methods              |                      |   |
| 27 |                      |                      |   |
| 28 |                      |                      |   |
| 29 | Statistical          | <a href="#">#12b</a> | 7 |
| 30 | methods              |                      |   |
| 31 |                      |                      |   |
| 32 |                      |                      |   |
| 33 | Statistical          | <a href="#">#12c</a> | 7 |
| 34 | methods              |                      |   |
| 35 |                      |                      |   |
| 36 |                      |                      |   |
| 37 | Statistical          | <a href="#">#12d</a> | 7 |
| 38 | methods              |                      |   |
| 39 |                      |                      |   |
| 40 |                      |                      |   |
| 41 | Statistical          | <a href="#">#12e</a> | 7 |
| 42 | methods              |                      |   |
| 43 |                      |                      |   |
| 44 | <b>Results</b>       |                      |   |
| 45 |                      |                      |   |
| 46 |                      |                      |   |
| 47 | Participants         | <a href="#">#13a</a> | 8 |
| 48 |                      |                      |   |
| 49 |                      |                      |   |
| 50 |                      |                      |   |
| 51 |                      |                      |   |
| 52 |                      |                      |   |
| 53 |                      |                      |   |
| 54 |                      |                      |   |
| 55 | Participants         | <a href="#">#13b</a> | 5 |
| 56 |                      |                      |   |
| 57 | Participants         | <a href="#">#13c</a> | 5 |
| 58 |                      |                      |   |
| 59 |                      |                      |   |
| 60 |                      |                      |   |

|    |                    |                      |                                                                                                                                                                                                                   |    |
|----|--------------------|----------------------|-------------------------------------------------------------------------------------------------------------------------------------------------------------------------------------------------------------------|----|
| 1  | Descriptive data   | <a href="#">#14a</a> | Give characteristics of study participants (eg demographic, clinical, social) and information on exposures and potential confounders. Give information separately for exposed and unexposed groups if applicable. | 8  |
| 2  |                    |                      |                                                                                                                                                                                                                   |    |
| 3  |                    |                      |                                                                                                                                                                                                                   |    |
| 4  |                    |                      |                                                                                                                                                                                                                   |    |
| 5  |                    |                      |                                                                                                                                                                                                                   |    |
| 6  | Descriptive data   | <a href="#">#14b</a> | Indicate number of participants with missing data for each variable of interest                                                                                                                                   | 8  |
| 7  |                    |                      |                                                                                                                                                                                                                   |    |
| 8  |                    |                      |                                                                                                                                                                                                                   |    |
| 9  |                    |                      |                                                                                                                                                                                                                   |    |
| 10 | Outcome data       | <a href="#">#15</a>  | Report numbers of outcome events or summary measures. Give information separately for exposed and unexposed groups if applicable.                                                                                 | 8  |
| 11 |                    |                      |                                                                                                                                                                                                                   |    |
| 12 |                    |                      |                                                                                                                                                                                                                   |    |
| 13 |                    |                      |                                                                                                                                                                                                                   |    |
| 14 | Main results       | <a href="#">#16a</a> | Give unadjusted estimates and, if applicable, confounder-adjusted estimates and their precision (eg, 95% confidence interval). Make clear which confounders were adjusted for and why they were included          | 11 |
| 15 |                    |                      |                                                                                                                                                                                                                   |    |
| 16 |                    |                      |                                                                                                                                                                                                                   |    |
| 17 |                    |                      |                                                                                                                                                                                                                   |    |
| 18 |                    |                      |                                                                                                                                                                                                                   |    |
| 19 | Main results       | <a href="#">#16b</a> | Report category boundaries when continuous variables were categorized                                                                                                                                             | 8  |
| 20 |                    |                      |                                                                                                                                                                                                                   |    |
| 21 | Main results       | <a href="#">#16c</a> | If relevant, consider translating estimates of relative risk into absolute risk for a meaningful time period                                                                                                      | 11 |
| 22 |                    |                      |                                                                                                                                                                                                                   |    |
| 23 |                    |                      |                                                                                                                                                                                                                   |    |
| 24 |                    |                      |                                                                                                                                                                                                                   |    |
| 25 | Other analyses     | <a href="#">#17</a>  | Report other analyses done—e.g., analyses of subgroups and interactions, and sensitivity analyses                                                                                                                 | 12 |
| 26 |                    |                      |                                                                                                                                                                                                                   |    |
| 27 |                    |                      |                                                                                                                                                                                                                   |    |
| 28 |                    |                      |                                                                                                                                                                                                                   |    |
| 29 | <b>Discussion</b>  |                      |                                                                                                                                                                                                                   |    |
| 30 |                    |                      |                                                                                                                                                                                                                   |    |
| 31 | Key results        | <a href="#">#18</a>  | Summarise key results with reference to study objectives                                                                                                                                                          | 16 |
| 32 |                    |                      |                                                                                                                                                                                                                   |    |
| 33 |                    |                      |                                                                                                                                                                                                                   |    |
| 34 | Limitations        | <a href="#">#19</a>  | Discuss limitations of the study, taking into account sources of potential bias or imprecision. Discuss both direction and magnitude of any potential bias.                                                       | 20 |
| 35 |                    |                      |                                                                                                                                                                                                                   |    |
| 36 |                    |                      |                                                                                                                                                                                                                   |    |
| 37 |                    |                      |                                                                                                                                                                                                                   |    |
| 38 |                    |                      |                                                                                                                                                                                                                   |    |
| 39 | Interpretation     | <a href="#">#20</a>  | Give a cautious overall interpretation considering objectives, limitations, multiplicity of analyses, results from similar studies, and other relevant evidence.                                                  | 21 |
| 40 |                    |                      |                                                                                                                                                                                                                   |    |
| 41 |                    |                      |                                                                                                                                                                                                                   |    |
| 42 |                    |                      |                                                                                                                                                                                                                   |    |
| 43 |                    |                      |                                                                                                                                                                                                                   |    |
| 44 | Generalisability   | <a href="#">#21</a>  | Discuss the generalisability (external validity) of the study results                                                                                                                                             | 21 |
| 45 |                    |                      |                                                                                                                                                                                                                   |    |
| 46 |                    |                      |                                                                                                                                                                                                                   |    |
| 47 | <b>Other</b>       |                      |                                                                                                                                                                                                                   |    |
| 48 | <b>Information</b> |                      |                                                                                                                                                                                                                   |    |
| 49 |                    |                      |                                                                                                                                                                                                                   |    |
| 50 |                    |                      |                                                                                                                                                                                                                   |    |
| 51 | Funding            | <a href="#">#22</a>  | Give the source of funding and the role of the funders for the present study and, if applicable, for the original study on which the present article is based                                                     | 2  |
| 52 |                    |                      |                                                                                                                                                                                                                   |    |
| 53 |                    |                      |                                                                                                                                                                                                                   |    |
| 54 |                    |                      |                                                                                                                                                                                                                   |    |
| 55 |                    |                      |                                                                                                                                                                                                                   |    |

The STROBE checklist is distributed under the terms of the Creative Commons Attribution License CC-BY.

This checklist was completed on 04. November 2020 using <https://www.goodreports.org/>, a tool made by the

[EQUATOR Network](#) in collaboration with [Penelope.ai](#)

For peer review only - <http://bmjopen.bmj.com/site/about/guidelines.xhtml>
