# Supplementary material for: Risk of COVID-19-related bullying, harassment and stigma among healthcare workers: an analytical cross-sectional global study
Source: PubMed Central journal article supplement — BMJ Open. 2020 Dec 30;10(12):e046620. doi: 10.1136/bmjopen-2020-046620 (PMC7780430; doi:10.1136/bmjopen-2020-046620), 2020-12-30
Supplement: bmjopen-2020-046620supp002.pdf [file bmjopen-2020-046620supp002.pdf]

*Confidential*

Page 1

## Encuesta global sobre coronavirus

¡Bienvenido! Lo invitamos a participar en una encuesta epidemiológica global de la Universidad de Rochester para ayudarnos a comprender mejor las actitudes, creencias y conocimientos sobre temas relacionados con asuntos de salud pública, como el coronavirus, COVID-19, y otras enfermedades infecciosas, y los factores que podrían estar relacionados con ellos. Si tiene 18 años o más y puede responder a la encuesta en español, siga leyendo!

---

LANGUAGE \_\_\_\_\_

Confidential

Page 2

SCHOOL OF MEDICINE AND DENTISTRY

Department of Obstetrics &amp; Gynecology

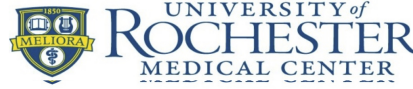

**Encuesta global sobre coronavirus: Investigador Principal de opiniones y prácticas: Timothy Dye, PhD y Eva Pressman, MD**

Este formulario describe un estudio de investigación que está llevando adelante el profesorado de la Universidad de Rochester, Facultad de Medicina y Odontología.

El objeto de este estudio es comprender mejor las actitudes, creencias y conocimientos sobre algunos temas relacionados con asuntos de salud pública, como el coronavirus y otras enfermedades infecciosas, y los factores que podrían estar relacionados con ellos. El estudio incluye preguntas acerca de sus pensamientos y experiencias con respecto al coronavirus y COVID-19, salud física y mental, estrés y apoyo social, así como también preguntas demográficas. Puede saltar todas las preguntas que quiera.

Si decide participar en este estudio, le pediremos que complete una encuesta mediante un enlace al que puede acceder por internet. Completar la encuesta le llevará aproximadamente entre 20 y 40 minutos. Estimamos que aproximadamente 7000 personas participarán en este estudio.

Los riesgos de participación son mínimos. Algunas de las preguntas podrían molestarlo o ponerlo incómodo. Puede saltar cualquier pregunta que no quiera responder. Para proteger la confidencialidad de los datos, los datos serán transmitidos en un formato encriptado (legible solamente para el personal autorizado). No se esperan beneficios de esta encuesta.

No recibirá compensación por participar en esta encuesta.

La Universidad de Rochester hace todo lo posible por mantener la información obtenida de usted confidencial. Los resultados de la investigación se pueden presentar en reuniones o en publicaciones, y no identificarán a personas específicas que respondieron.

**Su participación en este estudio es completamente voluntaria.** No está obligado a participar y puede dejar de completar la encuesta en cualquier momento. Si decide detenerse, no podemos eliminar su información, dado que no recopilamos ningún tipo de información que lo identifique, y no podríamos encontrar y eliminar su registro.

Para más información, o si tiene preguntas sobre esta investigación, puede comunicarse con el Dr. Timothy Dye, por correo electrónico a [tim\\_dye@urmc.rochester.edu](mailto:tim_dye@urmc.rochester.edu).

La Universidad de Rochester está recibiendo un pago de la Fundación Mae Stone Goode por realizar este estudio de investigación.

Por favor, comuníquese con University of Rochester Research Subjects Review Board en 265 Crittenden Blvd., CU 420315, Rochester, NY 14642, Teléfono +1 (585) 276-0005 o +1 (877) 449-4441 por las siguientes razones:

- Desea hablar con alguien que no sea el personal de investigación acerca de sus derechos como sujeto de investigación;
- Para expresar preocupaciones con respecto a la investigación.

RSRB STUDY00004825  
Version Date: April 28, 2020

RSRB Approval Date: 4/28/2020

*Confidential*

Page 3

---

**Information Sheet**

Encuesta global sobre coronavirus: Investigador Principal de opiniones y prácticas: Timothy Dye, PhD y Eva Pressman, MD

Este formulario describe un estudio de investigación que está llevando adelante el profesorado de la Universidad de Rochester, Facultad de Medicina y Odontología.

El objeto de este estudio es comprender mejor las actitudes, creencias y conocimientos sobre algunos temas relacionados con asuntos de salud pública, como el coronavirus y otras enfermedades infecciosas, y los factores que podrían estar relacionados con ellos. El estudio incluye preguntas acerca de sus pensamientos y experiencias con respecto al coronavirus y COVID-19, salud física y mental, estrés y apoyo social, así como también preguntas demográficas. Puede saltar todas las preguntas que quiera.

Si decide participar en este estudio, le pediremos que complete una encuesta mediante un enlace al que puede acceder por internet. Completar la encuesta le llevará aproximadamente entre 15 y 25 minutos. Estimamos que aproximadamente 7000 personas participarán en este estudio.

Los riesgos de participación son mínimos. Algunas de las preguntas podrían molestarlo o ponerlo incómodo. Puede saltar cualquier pregunta que no quiera responder. Para proteger la confidencialidad de los datos, los datos serán transmitidos en un formato encriptado (legible solamente para el personal autorizado). No se esperan beneficios de esta encuesta.

No recibirá compensación por participar en esta encuesta.

La Universidad de Rochester hace todo lo posible por mantener la información obtenida de usted confidencial. Los resultados de la investigación se pueden presentar en reuniones o en publicaciones, y no identificarán a personas específicas que respondieron.

Su participación en este estudio es completamente voluntaria. No está obligado a participar y puede dejar de completar la encuesta en cualquier momento. Si decide detenerse, no podemos eliminar su información, dado que no recopilamos ningún tipo de información que lo identifique, y no podríamos encontrar y eliminar su registro.

Para más información, o si tiene preguntas sobre esta investigación, puede comunicarse con el Dr. Timothy Dye, por correo electrónico a [tim\\_dye@urmc.rochester.edu](mailto:tim_dye@urmc.rochester.edu).

La Universidad de Rochester está recibiendo un pago de la Fundación Mae Stone Goode por realizar este estudio de investigación.

Por favor, comuníquese con University of Rochester Research Subjects Review Board en 265 Crittenden Blvd., CU 420315, Rochester, NY 14642, Teléfono +1 (585) 276-0005 o +1 (877) 449-4441 por las siguientes razones:

Desea hablar con alguien que no sea el personal de investigación acerca de sus derechos como sujeto de investigación.

12/07/2020 9:12 am

[projectredcap.org](http://projectredcap.org)

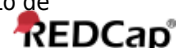

Para expresar preocupaciones con respecto a la investigación.

---

¿Continuar con la encuesta?

- Sí  
 No

Confidential

Page 5

## Sección 1: Preguntas sobre país

Confidential

Page 6

1. ¿En qué país vive?

- Afganistán
- Albania
- Alemania
- Andorra
- Angola
- Anguila
- Antártida [a]
- Antigua y Barbuda
- Arabia Saudita
- Argelia
- Argentina
- Armenia
- Aruba
- Australia [b]
- Austria
- Azerbaiyán
- Bahamas (el)
- Bahrein
- Bangladesh
- Barbados
- Bélgica
- Belice
- Benin
- Bielorrusia
- Bolivia (Estado Plurinacional de)
- Bonaire
- Bosnia y Herzegovina
- Botsuana
- Brasil
- Brunei Darussalam [e]
- Bulgaria
- Burkina Faso
- Burundi
- Bután
- Cabo Verde [f]
- Camboya
- Camerún
- Canadá
- Chad
- Chequia [i]
- Chile
- China
- Chipre
- Colombia
- Comoras (las)
- Congo (el) [g]
- Congo (la República Democrática del)
- Corea (la República de) [p]
- Corea (la República Popular Democrática de) [o]
- Costa de Marfil [h]
- Costa Rica
- Croacia
- Cuba
- Curagao
- Dinamarca
- Djibouti
- Dominica
- Ecuador
- Egipto
- El Salvador
- Emiratos Árabes Unidos (el)
- Eritrea
- Eslovaquia
- Eslovenia
- España
- Estados Unidos de América (el)
- Estonia
- Eswatini [j]
- Etiopía

12/04/2020 9:12am

projectredcap.org

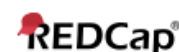

- Federación de Rusia (la) [v]
- Fiji
- Filipinas (el)
- Finlandia
- Francia [l]
- Gabón
- Gambia (el)
- Georgia
- Georgia del Sur y las Islas Sandwich del Sur
- Ghana
- Gibraltar
- Granada
- Grecia
- Groenlandia
- Guadalupe
- Guam
- Guatemala
- Guayana
- Guayana Francesa
- Guernsey
- Guinea
- Guinea Ecuatorial
- Guinea-Bissau
- Honduras
- Hong Kong
- Hungría
- India
- Indonesia
- Irak
- Irán (República Islámica de)
- Irlanda
- isla Ascencion
- Isla Bouvet
- Isla de Navidad
- Isla del hombre
- Isla Norfolk
- Islandia
- Islas Aland
- islas Bermudas
- Islas Caimán (las)
- Islas Cocos (Keeling) (las)
- Islas Cook (las)
- Islas Feroe (las)
- Islas Heard y McDonald
- Islas Malvinas (las) [Malvinas] [k]
- Islas Marianas del Norte (las)
- Islas Marshall (las)
- Islas Salomón
- Islas Turcas y Caicos (la)
- Islas ultramarinas menores de Estados Unidos (the) [ac]
- Islas Vírgenes (EE, UU,) [Ag]
- Islas Vírgenes Británicas [af]
- Israel
- Italia
- Jamaica
- Jan Mayen
- Japan
- Jersey
- Jordán
- Katar
- Kazajstán
- Kenia
- Kirguistán
- Kiribati
- Kuwait
- Lesoto
- Letonia
- Líbano
- Liberia
- Libia

- Liechtenstein
- Lituania
- Luxemburgo
- Macao [r]
- Macedonia del norte [s]
- Madagascar
- Malasia
- Malawi
- Maldivas
- Mali
- Malta
- Marruecos
- Martinica
- Mauricio
- Mauritania
- Mayotte
- México
- Micronesia (Estados Federados de)
- Moldavia (la República de)
- Mónaco
- Mongolia
- Montenegro
- Montserrat
- Mozambique
- Myanmar [t]
- Namibia
- Nauru
- Nepal
- Nicaragua
- Níger (el)
- Nigeria
- Niue
- Noruega
- Nueva Caledonia
- Nueva Zelanda
- Omán
- Países Bajos (el)
- Pakistán
- Palau
- Palestina, Estado de
- Panamá
- Papúa Nueva Guinea
- Paraguay
- Perú
- Pitcairn [u]
- Polinesia francés
- Polonia
- Portugal
- Puerto Rico
- Reino Unido de Gran Bretaña e Irlanda del Norte (el)
- República Árabe Siria (la) [x]
- República Centroafricana (la)
- República Democrática Popular Lao (la) [q]
- República Dominicana (la)
- Reunión
- Ruanda
- Rumania
- Saba
- Sáhara Occidental [ah]
- Samoa
- Samoa Americana
- San Bartolomé
- San Cristóbal y Nieves
- San Eustaquio
- San Marino
- San Martín (parte francesa)
- San Pedro y Miquelón
- San Vicente y las Granadinas
- Santa Helena
- Santa Lucía



- Santa Sede (la) [n]
- Santo Tomé y Príncipe
- Senegal
- Serbia
- Seychelles
- Sierra Leona
- Singapur
- Sint Maarten (parte holandesa)
- Somalia
- Sri Lanka
- Sudáfrica
- Sudán (el)
- Sudán del Sur
- Suecia
- Suiza
- Surinam
- Svalbard
- Tailandia
- Taiwán (Provincia de China) [y]
- Tanzania, la República Unida de
- Tayikistán
- Territorio Británico del Océano Índico (el)
- Territorios Australes Franceses (el) [m]
- Timor-Leste [aa]
- Togo
- Tokelau
- Tonga
- Trinidad y Tobago
- Tristan da Cunha
- Túnez
- Turkmenistán
- Turquía
- Tuvalu
- Ucrania
- Uganda
- Uruguay
- Uzbekistán
- Vanuatu
- Venezuela (República Bolivariana de)
- Vietnam [ae]
- Wallis y Futuna
- Yemen
- Zambia
- Zimbabue
- Otro

---

Vive en otro país, especifica:

---

Confidential

Page 10

1b. Si es residente de Estados Unidos, ¿en qué Estado vive?

- Alabama
- Alaska
- Arizona
- Arkansas
- California
- Colorado
- Connecticut
- Delaware
- Florida
- Georgia
- Hawaii
- Idaho
- Illinois
- Indiana
- Iowa
- Kansas
- Kentucky
- Louisiana
- Maine
- Maryland
- Massachusetts
- Michigan
- Minnesota
- Mississippi
- Missouri
- Montana
- Nebraska
- Nevada
- New Hampshire
- New Jersey
- New Mexico
- New York
- North Carolina
- North Dakota
- Ohio
- Oklahoma
- Oregon
- Pennsylvania
- Rhode Island
- South Carolina
- South Dakota
- Tennessee
- Texas
- Utah
- Vermont
- Virginia
- Washington
- West Virginia
- Wisconsin
- Wyoming

Confidential

Page 11

1c. Si es residente de la India, ¿en qué Estado vive?

- IN-AP = Andhra Pradesh
- IN-AR = Arunachal Pradesh
- IN-AS = Assam
- IN-BR = Bihar
- IN-CT = Chhattisgarh
- IN-GA = Goa
- IN-GJ = Gujarat
- IN-HR = Haryana
- IN-HP = Himachal Pradesh
- IN-JH = Jharkhand
- IN-KA = Karnataka
- IN-KL = Kerala
- IN-MP = Madhya Pradesh
- IN-MH = Maharashtra
- IN-MN = Manipur
- IN-ML = Meghalaya
- IN-MZ = Mizoram
- IN-NL = Nagaland
- IN-OR = Odisha
- IN-PB = Punjab
- IN-RJ = Rajasthan
- IN-SK = Sikkim
- IN-TN = Tamil Nadu
- IN-TG = Telangana
- IN-TR = Tripura
- IN-UT = Uttarakhand
- IN-UP = Uttar Pradesh
- IN-WB = West Bengal
- IN-AN = Andaman and Nicobar Islands
- IN-CH = Chandigarh
- IN-DN = Dadra and Nagar Haveli
- IN-DD = Daman and Diu
- IN-DL = Delhi
- IN-JK = Jammu and Kashmir
- IN-LA = Ladakh
- IN-LD = Lakshadweep
- IN-PY = Puducherry

Confidential

Page 12

2. ¿En qué país nació?

- Afganistán
- Albania
- Alemania
- Andorra
- Angola
- Anguila
- Antártida [a]
- Antigua y Barbuda
- Arabia Saudita
- Argelia
- Argentina
- Armenia
- Aruba
- Australia [b]
- Austria
- Azerbaiyán
- Bahamas (el)
- Bahrein
- Bangladesh
- Barbados
- Bélgica
- Belice
- Benin
- Bielorrusia
- Bolivia (Estado Plurinacional de)
- Bonaire
- Bosnia y Herzegovina
- Botsuana
- Brasil
- Brunei Darussalam [e]
- Bulgaria
- Burkina Faso
- Burundi
- Bután
- Cabo Verde [f]
- Camboya
- Camerún
- Canadá
- Chad
- Chequia [i]
- Chile
- China
- Chipre
- Colombia
- Comoras (las)
- Congo (el) [g]
- Congo (la República Democrática del)
- Corea (la República de) [p]
- Corea (la República Popular Democrática de) [o]
- Costa de Marfil [h]
- Costa Rica
- Croacia
- Cuba
- Curagao
- Dinamarca
- Djibouti
- Dominica
- Ecuador
- Egipto
- El Salvador
- Emiratos Árabes Unidos (el)
- Eritrea
- Eslovaquia
- Eslovenia
- España
- Estados Unidos de América (el)
- Estonia
- Eswatini [j]
- Etiopía

12/04/2020 9:12am

projectredcap.org

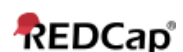

- Federación de Rusia (la) [v]
- Fiji
- Filipinas (el)
- Finlandia
- Francia [l]
- Gabón
- Gambia (el)
- Georgia
- Georgia del Sur y las Islas Sandwich del Sur
- Ghana
- Gibraltar
- Granada
- Grecia
- Groenlandia
- Guadalupe
- Guam
- Guatemala
- Guayana
- Guayana Francesa
- Guernsey
- Guinea
- Guinea Ecuatorial
- Guinea-Bissau
- Honduras
- Hong Kong
- Hungría
- India
- Indonesia
- Irak
- Irán (República Islámica de)
- Irlanda
- isla Ascencion
- Isla Bouvet
- Isla de Navidad
- Isla del hombre
- Isla Norfolk
- Islandia
- Islas Aland
- islas Bermudas
- Islas Caimán (las)
- Islas Cocos (Keeling) (las)
- Islas Cook (las)
- Islas Feroe (las)
- Islas Heard y McDonald
- Islas Malvinas (las) [Malvinas] [k]
- Islas Marianas del Norte (las)
- Islas Marshall (las)
- Islas Salomón
- Islas Turcas y Caicos (la)
- Islas ultramarinas menores de Estados Unidos (the) [ac]
- Islas Vírgenes (EE, UU,) [Ag]
- Islas Vírgenes Británicas [af]
- Israel
- Italia
- Jamaica
- Jan Mayen
- Japan
- Jersey
- Jordán
- Katar
- Kazajstán
- Kenia
- Kirguistán
- Kiribati
- Kuwait
- Lesoto
- Letonia
- Líbano
- Liberia
- Libia

- Liechtenstein
- Lituania
- Luxemburgo
- Macao [r]
- Macedonia del norte [s]
- Madagascar
- Malasia
- Malawi
- Maldivas
- Mali
- Malta
- Marruecos
- Martinica
- Mauricio
- Mauritania
- Mayotte
- México
- Micronesia (Estados Federados de)
- Moldavia (la República de)
- Mónaco
- Mongolia
- Montenegro
- Montserrat
- Mozambique
- Myanmar [t]
- Namibia
- Nauru
- Nepal
- Nicaragua
- Níger (el)
- Nigeria
- Niue
- Noruega
- Nueva Caledonia
- Nueva Zelanda
- Omán
- Países Bajos (el)
- Pakistán
- Palau
- Palestina, Estado de
- Panamá
- Papúa Nueva Guinea
- Paraguay
- Perú
- Pitcairn [u]
- Polinesia francés
- Polonia
- Portugal
- Puerto Rico
- Reino Unido de Gran Bretaña e Irlanda del Norte (el)
- República Árabe Siria (la) [x]
- República Centroafricana (la)
- República Democrática Popular Lao (la) [q]
- República Dominicana (la)
- Reunión
- Ruanda
- Rumania
- Saba
- Sáhara Occidental [ah]
- Samoa
- Samoa Americana
- San Bartolomé
- San Cristóbal y Nieves
- San Eustaquio
- San Marino
- San Martín (parte francesa)
- San Pedro y Miquelón
- San Vicente y las Granadinas
- Santa Helena
- Santa Lucía

- Santa Sede (la) [n]
- Santo Tomé y Príncipe
- Senegal
- Serbia
- Seychelles
- Sierra Leona
- Singapur
- Sint Maarten (parte holandesa)
- Somalia
- Sri Lanka
- Sudáfrica
- Sudán (el)
- Sudán del Sur
- Suecia
- Suiza
- Surinam
- Svalbard
- Tailandia
- Taiwán (Provincia de China) [y]
- Tanzania, la República Unida de
- Tayikistán
- Territorio Británico del Océano Índico (el)
- Territorios Australes Franceses (el) [m]
- Timor-Leste [aa]
- Togo
- Tokelau
- Tonga
- Trinidad y Tobago
- Tristan da Cunha
- Túnez
- Turkmenistán
- Turquía
- Tuvalu
- Ucrania
- Uganda
- Uruguay
- Uzbekistán
- Vanuatu
- Venezuela (República Bolivariana de)
- Vietnam [ae]
- Wallis y Futuna
- Yemen
- Zambia
- Zimbabue
- Otro

---

Nació en otro país, especifique:

---

Confidential

Page 16

**Sección 2: Actitudes relativas a la salud**

**Cada uno de los siguientes puntos es una afirmación acerca de su salud. Puede estar de acuerdo o desacuerdo con ella. Es una medición de sus creencias personales; no hay respuestas correctas o incorrectas. Díganos cuán de acuerdo o cuán en desacuerdo está con cada punto.**

|                                                                                                             | Muy en desacuerdo     | En desacuerdo         | Ni de acuerdo ni en desacuerdo | De acuerdo            | Muy de acuerdo        |
|-------------------------------------------------------------------------------------------------------------|-----------------------|-----------------------|--------------------------------|-----------------------|-----------------------|
| 1. Si me enfermo, es mi propio comportamiento lo que determina cuán pronto mejoro.                          | <input type="radio"/> | <input type="radio"/> | <input type="radio"/>          | <input type="radio"/> | <input type="radio"/> |
| 2. No importa qué haga, si me tengo que enfermar, me voy a enfermar.                                        | <input type="radio"/> | <input type="radio"/> | <input type="radio"/>          | <input type="radio"/> | <input type="radio"/> |
| 3. La mejor manera de evitar enfermarme es teniendo contacto regular con mi médico.                         | <input type="radio"/> | <input type="radio"/> | <input type="radio"/>          | <input type="radio"/> | <input type="radio"/> |
| 4. La mayoría de las cosas que afectan mi salud me suceden por accidente.                                   | <input type="radio"/> | <input type="radio"/> | <input type="radio"/>          | <input type="radio"/> | <input type="radio"/> |
| 5. Cuando no me siento bien, debo hablar con un profesional médico capacitado.                              | <input type="radio"/> | <input type="radio"/> | <input type="radio"/>          | <input type="radio"/> | <input type="radio"/> |
| 6. Estoy en control de mi salud.                                                                            | <input type="radio"/> | <input type="radio"/> | <input type="radio"/>          | <input type="radio"/> | <input type="radio"/> |
| 7. Mi familia tiene mucho que ver con si me enfermo o estoy saludable                                       | <input type="radio"/> | <input type="radio"/> | <input type="radio"/>          | <input type="radio"/> | <input type="radio"/> |
| 8. Cuando me enfermo, el culpable soy yo.                                                                   | <input type="radio"/> | <input type="radio"/> | <input type="radio"/>          | <input type="radio"/> | <input type="radio"/> |
| 9. La suerte juega un papel importante a la hora de determinar cuán rápido me recuperaré de una enfermedad. | <input type="radio"/> | <input type="radio"/> | <input type="radio"/>          | <input type="radio"/> | <input type="radio"/> |
| 10. Los profesionales de la salud controlan mi salud.                                                       | <input type="radio"/> | <input type="radio"/> | <input type="radio"/>          | <input type="radio"/> | <input type="radio"/> |
| 11. Mi buena salud se debe en gran parte a la buena suerte.                                                 | <input type="radio"/> | <input type="radio"/> | <input type="radio"/>          | <input type="radio"/> | <input type="radio"/> |
| 12. Lo principal que afecta mi salud es lo que yo, personalmente, hago                                      | <input type="radio"/> | <input type="radio"/> | <input type="radio"/>          | <input type="radio"/> | <input type="radio"/> |



## Confidential

Page 17

- |                                                                                                                                                                   |                       |                       |                       |                       |                       |
|-------------------------------------------------------------------------------------------------------------------------------------------------------------------|-----------------------|-----------------------|-----------------------|-----------------------|-----------------------|
| 13. Si me cuido, puedo evitar enfermarme.                                                                                                                         | <input type="radio"/> |
| 14. Cuando me recupero de una enfermedad, en general es porque otras personas (por ejemplo, médicos, enfermeros, familiares, amigos) me han estado cuidando bien. | <input type="radio"/> |
| 15. No importa qué haga, es probable que me enferme.                                                                                                              | <input type="radio"/> |
| 16. Si tiene que ser, estaré saludable.                                                                                                                           | <input type="radio"/> |
| 17. Si tomo las acciones correctas, me puedo mantener saludable.                                                                                                  | <input type="radio"/> |
| 18. Con respecto a mi salud, solo puedo hacer lo que mi médico me dice que haga.                                                                                  | <input type="radio"/> |

Confidential

Page 18

**Sección 3 - Creencias con respecto al coronavirus****1. Según sus conocimientos, ¿los expertos de salud pública han recomendado estas acciones como una manera de ayudar a detener la propagación del coronavirus?**

|                                                            | Sí, recomendado       | No, no se recomienda  | No sabe               |
|------------------------------------------------------------|-----------------------|-----------------------|-----------------------|
| a. Lavado de manos frecuente                               | <input type="radio"/> | <input type="radio"/> | <input type="radio"/> |
| b. Hervir agua antes de beberla                            | <input type="radio"/> | <input type="radio"/> | <input type="radio"/> |
| c. Que las personas saludables usen mascarillas en público | <input type="radio"/> | <input type="radio"/> | <input type="radio"/> |
| d. Evitar reuniones con muchas personas                    | <input type="radio"/> | <input type="radio"/> | <input type="radio"/> |
| e. Usar repelente para mosquitos                           | <input type="radio"/> | <input type="radio"/> | <input type="radio"/> |
| f. Quedarse en casa si se siente enfermo                   | <input type="radio"/> | <input type="radio"/> | <input type="radio"/> |

g. Otras recomendaciones

Confidential

Page 19

**2. Según sus conocimientos, ¿cuáles de las siguientes son maneras en las que se transmite o propaga el coronavirus?**

|                                                                                                       | Sí, se transmite de esta manera | No, no se transmite de esta manera | No sabe               |
|-------------------------------------------------------------------------------------------------------|---------------------------------|------------------------------------|-----------------------|
| a. Estar en proximidad física cercana con alguien infectado                                           | <input type="radio"/>           | <input type="radio"/>              | <input type="radio"/> |
| b. Tocar superficies que contienen pequeñas cantidades de fluidos corporales de una persona infectada | <input type="radio"/>           | <input type="radio"/>              | <input type="radio"/> |
| c. A través de picaduras de mosquito                                                                  | <input type="radio"/>           | <input type="radio"/>              | <input type="radio"/> |
| d. Por los genes/la genética                                                                          | <input type="radio"/>           | <input type="radio"/>              | <input type="radio"/> |

e. ¿De qué otra manera se contagia o propaga el coronavirus? Por favor, explique

---

Confidential

Page 20

**3. Para cada una de las siguientes, díganos si cree que es un síntoma común de infección con coronavirus (COVID-19)**

|                                 | Sí, es un síntoma     | No, no es un síntoma  | No sabe               |
|---------------------------------|-----------------------|-----------------------|-----------------------|
| a. Fiebre                       | <input type="radio"/> | <input type="radio"/> | <input type="radio"/> |
| b. Tos seca                     | <input type="radio"/> | <input type="radio"/> | <input type="radio"/> |
| c. Vómitos                      | <input type="radio"/> | <input type="radio"/> | <input type="radio"/> |
| d. Congestión nasal/goteo nasal | <input type="radio"/> | <input type="radio"/> | <input type="radio"/> |
| e. Sarpullido                   | <input type="radio"/> | <input type="radio"/> | <input type="radio"/> |

---

f. Otros síntomas (describir, por favor:)

---

Confidential

Page 21

**4. ¿Cree que alguno de los siguientes grupos tiene un riesgo más alto de desarrollar problemas médicos graves si se infecta con coronavirus?**

|                                               | Sí, mayor riesgo      | No, no corre mayor riesgo | No sabe               |
|-----------------------------------------------|-----------------------|---------------------------|-----------------------|
| a. Niños                                      | <input type="radio"/> | <input type="radio"/>     | <input type="radio"/> |
| b. Mujeres embarazadas                        | <input type="radio"/> | <input type="radio"/>     | <input type="radio"/> |
| c. Personas con condiciones de salud crónicas | <input type="radio"/> | <input type="radio"/>     | <input type="radio"/> |
| d. Personas de entre 20 y 29 años             | <input type="radio"/> | <input type="radio"/>     | <input type="radio"/> |
| e. Personas con obesidad                      | <input type="radio"/> | <input type="radio"/>     | <input type="radio"/> |
| f. Personas mayores de 60 años                | <input type="radio"/> | <input type="radio"/>     | <input type="radio"/> |

5. Hasta donde usted sabe, ¿hay una vacuna para proteger a las personas del coronavirus actual, también conocido como COVID-19?

Sí  No  No sabe

6. Hasta donde usted sabe, ¿la vacuna contra la gripe, o la gripe estacional, protege a las personas del coronavirus actual, también conocido como COVID-19?

Sí  No  No sabe

7. Hasta donde usted sabe, si alguien cree que tiene síntomas de coronavirus, ¿qué debe hacer?

Quedarse en casa y llamar al médico o proveedor médico

Buscar atención médica de inmediato en una sala de emergencias o centro de cuidado de emergencia

Otra cosa

No sabe

7a. Otra cosa, por favor explique

---

Confidential

Page 22

**Sección 4 - Cuestiones de salud y experiencia**

1. ¿Siente que no tiene suficiente información sobre cómo protegerse usted y a su familia del coronavirus?

Sí  No  No sabe

2. ¿Qué hace, si hace algo, para protegerse usted y a su familia del coronavirus?

\_\_\_\_\_

3. ¿Cree que la preocupación o el estrés en relación con el coronavirus han tenido un impacto negativo en su salud mental?

Sí- impacto importante  
 Sí - impacto menor  
 No  
 No sabe

3b. Por favor, explique:

\_\_\_\_\_

Confidential

Page 23

**q4. ¿Qué tan efectivo cree que fue cada uno de los siguientes grupos en tomar medidas en contra del coronavirus y COVID-19?**

a. El sistema de salud médica (incluyendo hospitales, clínicas, médicos, enfermeros y otros proveedores de la salud)

- Para nada eficaz  
 No muy eficaz  
 Algo eficaz  
 Muy eficaz

a. Por favor, explique:

---

b. La ciencia (incluyendo investigadores y analistas)

- Para nada eficaz  
 No muy eficaz  
 Algo eficaz  
 Muy eficaz

b. Por favor, explique:

---

c. El gobierno (incluyendo el gobierno local y nacional)

- Para nada eficaz  
 No muy eficaz  
 Algo eficaz  
 Muy eficaz

c. Por favor, explique:

---

d. El sistema educativo (incluyendo escuelas primarias, escuelas secundarias y universidades)

- Para nada eficaz  
 No muy eficaz  
 Algo eficaz  
 Muy eficaz

d. Por favor, explique:

---

e. Tiendas y servicios locales (incluyendo almacenes, supermercados, restaurantes)

- Para nada eficaz  
 No muy eficaz  
 Algo eficaz  
 Muy eficaz

e. Por favor, explique:

---

f. La industria (incluyendo grandes empleadores, fábricas, fabricantes)

- Para nada eficaz  
 No muy eficaz  
 Algo eficaz  
 Muy eficaz

f. Por favor, explique:

---

Confidential

Page 24

---

g. La prensa (incluyendo periodistas, periódicos, televisión y medios visuales)

- Para nada eficaz
- No muy eficaz
- Algo eficaz
- Muy eficaz

---

g. Por favor, explique:

---

---

h. Plataformas de redes sociales

- Para nada eficaz
- No muy eficaz
- Algo eficaz
- Muy eficaz

---

h. Por favor, explique:

---



Confidential

Page 25

**5. ¿Qué tan preocupado está, si es que lo está, sobre cada uno de los siguientes puntos?**

|                                                                                                                           | Muy preocupado        | Algo preocupado       | No Muy preocupado     | Para nada preocupado  | No sabe               |
|---------------------------------------------------------------------------------------------------------------------------|-----------------------|-----------------------|-----------------------|-----------------------|-----------------------|
| a. Usted o alguien en su familia contraerán el coronavirus                                                                | <input type="radio"/> |
| b. Perderá ingresos debido al cierre de su lugar de trabajo o debido a la reducción de horas a causa del coronavirus      | <input type="radio"/> |
| c. Contraer la Enfermedad de Lyme                                                                                         | <input type="radio"/> |
| d. Sus inversiones como los ahorros para el retiro o la universidad se verán afectadas por el coronavirus                 | <input type="radio"/> |
| e. Contraer dengue                                                                                                        | <input type="radio"/> |
| f. Se pondrá en riesgo de exposición al coronavirus porque no puede darse el lujo de quedarse en casa y faltar al trabajo | <input type="radio"/> |
| g. No podrá pagar las pruebas o el tratamiento para el coronavirus si lo necesita                                         | <input type="radio"/> |

h. Le preocupa otra cosa, por favor, explique

---

5b. ¿Cuánto ha cambiado su vida, si cambió algo, debido al brote de coronavirus?

- Mucho  
 Algo  
 Solo un poco  
 Para nada  
 No sabe

5b. Por favor, explique, ¿cuánto ha cambiado su vida, si cambió algo, debido al brote de coronavirus?

---

Confidential

Page 26

**6. Por favor, cuéntenos si ha tomado algunas de las siguientes medidas debido al reciente brote de coronavirus.**

|                                                                                                     | Sí                    | No                    | No sabe               |
|-----------------------------------------------------------------------------------------------------|-----------------------|-----------------------|-----------------------|
| a. Decidió no viajar o cambiar los planes de viaje                                                  | <input type="radio"/> | <input type="radio"/> | <input type="radio"/> |
| b. Compró o usó una mascarilla de protección                                                        | <input type="radio"/> | <input type="radio"/> | <input type="radio"/> |
| c. Se abasteció de artículos como alimentos y suministros para el hogar                             | <input type="radio"/> | <input type="radio"/> | <input type="radio"/> |
| d. Pospuso o canceló visitas de atención médica                                                     | <input type="radio"/> | <input type="radio"/> | <input type="radio"/> |
| e. Obtuvo recargas adicionales para los medicamentos recetados                                      | <input type="radio"/> | <input type="radio"/> | <input type="radio"/> |
| f. Se quedó en casa en lugar de ir a trabajar, a la escuela o a otras actividades regulares         | <input type="radio"/> | <input type="radio"/> | <input type="radio"/> |
| g. Pospuso o canceló un procedimiento médico o cirugía                                              | <input type="radio"/> | <input type="radio"/> | <input type="radio"/> |
| h. Canceló planes para asistir a reuniones con muchas personas como conciertos o eventos deportivos | <input type="radio"/> | <input type="radio"/> | <input type="radio"/> |
| i. Renunció a su trabajo                                                                            | <input type="radio"/> | <input type="radio"/> | <input type="radio"/> |

6b. Por favor, comparta cualquier explicación o detalle con respecto a los puntos de arriba:

---

Confidential

Page 27

**7. ¿Ha experimentado cualquiera de los siguientes puntos debido al coronavirus?**

7a. Perdió ingresos del trabajo o negocio

- Sí  
 No  
 No sabe

a. Perdió ingresos del trabajo o negocio; por favor, explique

---

7b. No pudo comprar alimentos

- Sí  
 No  
 No sabe

b. No pudo comprar alimentos; por favor, explique

---

7c. No pudo comprar suministros de limpieza o desinfectante para manos

- Sí  
 No  
 No sabe

7c. No pudo comprar suministros de limpieza o desinfectante para manos; por favor, explique

---

7d. No pudo obtener medicamentos recetados

- Sí  
 No  
 No sabe

d. No pudo obtener medicamentos recetados; por favor, explique

---

7e. ¿Usted o un miembro de la familia han sido víctimas de acoso, hostigamiento o fueron ofendidos debido al coronavirus?

- Sí  
 No  
 No sabe

7e. Han sido víctimas de acoso, hostigamiento o fueron ofendidos debido al coronavirus; por favor, explique

---

8. ¿Qué tan estrictamente cumple con el distanciamiento social o físico, es decir, se queda en su casa, alejado siempre que pueda, o mantiene la distancia entre usted y las otras personas cuando está en un lugar público?

- Muy estrictamente  
 Algo estrictamente  
 No muy estrictamente  
 Para nada estrictamente

Por favor, cuéntenos más sobre sus pensamientos y experiencias con respecto al distanciamiento social o físico: (abierto)

---

9. ¿Fue evaluado personalmente para detectar el coronavirus?

- Sí, me han evaluado  
 No, no me han evaluado  
 No sabe

Confidential

Page 28

9a. Entre los evaluados: ¿cuál fue el resultado de la prueba para detectar el coronavirus?

- La prueba fue positiva  
 La prueba fue negativa  
 Aún no sabe

10. Entre los que no fueron evaluados: ¿Ha intentado ser evaluado para detectar el coronavirus, o no?

- Sí  
 No  
 No sabe

11. Entre los que no fueron evaluados: ¿Cree que podría obtener una prueba para detectar el coronavirus si cree que la necesita, o no?

- Sí  
 No  
 No sabe

11. Por favor, explique si cree que podría obtener una prueba para detectar el coronavirus si cree que la necesita.

\_\_\_\_\_

11. Por favor, explique por qué no cree que podría obtener una prueba para detectar el coronavirus si cree que la necesita.

\_\_\_\_\_

12. ¿Cree que tiene, o ha tenido recientemente, infección por coronavirus?

- Sí  
 No  
 No sabe

Por favor, explique por qué cree que tiene, o ha tenido recientemente, infección del coronavirus

\_\_\_\_\_

13. Si hubiera una vacuna para evitar que las personas contraigan coronavirus, ¿se pondría la vacuna?

- Sí  
 No  
 No sabe

Por favor, explique ¿por qué se pondría la vacuna si hubiese una disponible?

\_\_\_\_\_

Por favor, explique ¿por qué no se daría la vacuna si hubiese una disponible

\_\_\_\_\_

Por favor, explique ¿por qué no sabe si daría la vacuna si hubiese una disponible

\_\_\_\_\_

14. ¿Conoce personalmente a alguien que tenga la infección del coronavirus (o COVID-19)? Marque todas las que correspondan

- Sí, un miembro de la familia  
 Sí, un amigo  
 Sí, un vecino  
 Sí, otra persona  
 No  
 No sé

15. ¿Conoce personalmente a alguien que haya fallecido debido a la infección del coronavirus (o COVID-19)? Marque todas las que correspondan

- Sí, un miembro de la familia  
 Sí, un amigo  
 Sí, un vecino  
 Sí, otra persona  
 No  
 No sé

*Confidential*

Page 29

---

16. ¿Las personas hablan mal o chismean sobre otras personas con las que viven, que han tenido o se cree que tienen la infección del coronavirus (o COVID-19)?

- Definitivamente sí
- Probablemente sí
- Probablemente no
- Definitivamente no
- No sé

---

17. ¿Las personas que han tenido la infección del coronavirus (o COVID-19) pierden el respeto o el estatus en la comunidad?

- Definitivamente sí
- Probablemente sí
- Probablemente no
- Definitivamente no
- No sé

Confidential

Page 30

**Sección 5 -Preguntas domésticas**

1. ¿Es dueño de un automóvil?  Sí  
 No  
 Elijo no responder

2. ¿Es dueño de una vivienda?  Sí  
 No  
 Elijo no responder

3. ¿Es padre o tutor de un niño menor de 18 años que vive en su vivienda?  Sí  
 No  
 No sabe

4. ¿La escuela o guardería de su hijo ha cerrado por un período de tiempo como resultado del coronavirus?  Sí  
 No  
 No sabe

5. Si la escuela o guardería de su hijo está/estaba cerrada por dos semanas o más debido al coronavirus, ¿qué tan difícil ha sido/sería para usted hasta encontrar un cuidado infantil alternativo?  Muy difícil  
 Algo difícil  
 No muy difícil  
 Para nada difícil

6. Si se viera obligado a quedarse en su casa, ¿podría hacer, al menos, una parte de su trabajo desde su casa?  Sí  
 No  
 No aplica  
 No sabe

6. Por favor, explique cómo podría hacer, al menos, una parte de su trabajo desde su casa

\_\_\_\_\_

6. Por favor, explique por qué no podría hacer, al menos, una parte de su trabajo desde su casa

\_\_\_\_\_

7. ¿Usted o alguien en su vivienda trabajan en un entorno de atención de la salud, como un consultorio médico, clínica, hospital, hogar para personas mayores o consultorio odontológico? (marque todas las que correspondan)  Sí, yo  
 Sí, alguien en mi vivienda  
 No, nadie  
 No sabe

8. ¿Cuántos niños menores de 18 años viven actualmente en su vivienda?

\_\_\_\_\_

9. ¿Cuánto adultos, de 18 años o más, viven actualmente en su vivienda, incluido usted?

\_\_\_\_\_

10. ¿Es responsable del cuidado de los niños?  Sí  
 No  
 No sabe

Confidential

Page 31

---

11. ¿Es responsable del cuidado de personas mayores?

- Sí  
 No  
 No sabe

---

Por favor, cuéntenos sobre su sistema de apoyo social (amigos, familia, vecinos):

---

Confidential

Page 32

**Sección 6: Estrés en el último mes**

|                                                                                                                       | Nunca                 | Casi nunca            | A veces               | Con bastante frecuencia | Muy a menudo          |
|-----------------------------------------------------------------------------------------------------------------------|-----------------------|-----------------------|-----------------------|-------------------------|-----------------------|
| 1. En el último mes, ¿con qué frecuencia se molestó por algo que sucedió inesperadamente?                             | <input type="radio"/> | <input type="radio"/> | <input type="radio"/> | <input type="radio"/>   | <input type="radio"/> |
| 2. En el último mes, ¿con qué frecuencia sintió que no podía controlar las cosas importantes en su vida?              | <input type="radio"/> | <input type="radio"/> | <input type="radio"/> | <input type="radio"/>   | <input type="radio"/> |
| 3. En el último mes, ¿con qué frecuencia se sintió nervioso y "estresado"?                                            | <input type="radio"/> | <input type="radio"/> | <input type="radio"/> | <input type="radio"/>   | <input type="radio"/> |
| 4. En el último mes, ¿con qué frecuencia se sintió confiado sobre su habilidad para manejar sus problemas personales? | <input type="radio"/> | <input type="radio"/> | <input type="radio"/> | <input type="radio"/>   | <input type="radio"/> |
| 5. En el último mes, ¿con qué frecuencia sintió que las cosas le iban bien?                                           | <input type="radio"/> | <input type="radio"/> | <input type="radio"/> | <input type="radio"/>   | <input type="radio"/> |
| 6. En el último mes, ¿con qué frecuencia se dio cuenta que no podía lidiar con todas las cosas que debía hacer?       | <input type="radio"/> | <input type="radio"/> | <input type="radio"/> | <input type="radio"/>   | <input type="radio"/> |
| 7. En el último mes, ¿con qué frecuencia ha podido controlar las irritaciones en su vida?                             | <input type="radio"/> | <input type="radio"/> | <input type="radio"/> | <input type="radio"/>   | <input type="radio"/> |
| 8. En el último mes, ¿con qué frecuencia sintió que tenía control sobre las cosas?                                    | <input type="radio"/> | <input type="radio"/> | <input type="radio"/> | <input type="radio"/>   | <input type="radio"/> |
| 9. En el último mes, ¿con qué frecuencia se enojó por cosas que estaban fuera de su control?                          | <input type="radio"/> | <input type="radio"/> | <input type="radio"/> | <input type="radio"/>   | <input type="radio"/> |
| 10. En el último mes, ¿con qué frecuencia sintió que las dificultades se acumulaban y no podía superarlas?            | <input type="radio"/> | <input type="radio"/> | <input type="radio"/> | <input type="radio"/>   | <input type="radio"/> |

11. Por favor, cuéntenos sobre sus sentimientos de estrés en el último mes:

---



Confidential

Page 33

**Sección 7 - Apoyo social**

|                                                                                 | Muy fuertement e en desacuerdo | Muy en desacuerdo     | Algo en desacuerdo    | Neutral               | Algo de acuerdo       | Muy de acuerdo        | Muy fuertement e en acuerdo |
|---------------------------------------------------------------------------------|--------------------------------|-----------------------|-----------------------|-----------------------|-----------------------|-----------------------|-----------------------------|
| 1. Hay una persona especial que está conmigo cuando lo necesito.                | <input type="radio"/>          | <input type="radio"/> | <input type="radio"/> | <input type="radio"/> | <input type="radio"/> | <input type="radio"/> | <input type="radio"/>       |
| 2. Hay una persona especial con quien puedo compartir mis alegrías y tristezas. | <input type="radio"/>          | <input type="radio"/> | <input type="radio"/> | <input type="radio"/> | <input type="radio"/> | <input type="radio"/> | <input type="radio"/>       |
| 3. Mi familia realmente trata de ayudarme.                                      | <input type="radio"/>          | <input type="radio"/> | <input type="radio"/> | <input type="radio"/> | <input type="radio"/> | <input type="radio"/> | <input type="radio"/>       |
| 4. Recibo la ayuda y el apoyo emocional que necesito de mi familia.             | <input type="radio"/>          | <input type="radio"/> | <input type="radio"/> | <input type="radio"/> | <input type="radio"/> | <input type="radio"/> | <input type="radio"/>       |
| 5. Tengo una persona especial que es una verdadera fuente de alivio para mí.    | <input type="radio"/>          | <input type="radio"/> | <input type="radio"/> | <input type="radio"/> | <input type="radio"/> | <input type="radio"/> | <input type="radio"/>       |
| 6. Mi familia realmente trata de ayudarme.                                      | <input type="radio"/>          | <input type="radio"/> | <input type="radio"/> | <input type="radio"/> | <input type="radio"/> | <input type="radio"/> | <input type="radio"/>       |
| 7. Puedo contar con mis amigos cuando las cosas salen mal.                      | <input type="radio"/>          | <input type="radio"/> | <input type="radio"/> | <input type="radio"/> | <input type="radio"/> | <input type="radio"/> | <input type="radio"/>       |
| 8. Puedo hablar sobre mis problemas con mi familia.                             | <input type="radio"/>          | <input type="radio"/> | <input type="radio"/> | <input type="radio"/> | <input type="radio"/> | <input type="radio"/> | <input type="radio"/>       |
| 9. Tengo amigos con quienes puedo compartir mis alegrías y tristezas.           | <input type="radio"/>          | <input type="radio"/> | <input type="radio"/> | <input type="radio"/> | <input type="radio"/> | <input type="radio"/> | <input type="radio"/>       |
| 10. Hay una persona especial en mi vida que se preocupa por mis sentimientos.   | <input type="radio"/>          | <input type="radio"/> | <input type="radio"/> | <input type="radio"/> | <input type="radio"/> | <input type="radio"/> | <input type="radio"/>       |
| 11. Mi familia está dispuesta a ayudarme a tomar decisiones.                    | <input type="radio"/>          | <input type="radio"/> | <input type="radio"/> | <input type="radio"/> | <input type="radio"/> | <input type="radio"/> | <input type="radio"/>       |
| 12. Puedo hablar sobre mis problemas con mis amigos.                            | <input type="radio"/>          | <input type="radio"/> | <input type="radio"/> | <input type="radio"/> | <input type="radio"/> | <input type="radio"/> | <input type="radio"/>       |

Confidential

Page 34

**Sección 8: Preguntas sobre la salud**

1. ¿Diría usted que, en general, su capacidad de sanar es...?
- Excelente  
 Muy buena  
 Buena  
 Regular  
 Mala
- 
2. Ahora, con respecto a su salud física, lo que incluye enfermedad y lesión física, ¿cuántos días, en los últimos 30 días, no tuvo una buena salud física?
- \_\_\_\_\_ ((cantidad de días))
- 
3. Ahora, con respecto a su salud mental, lo que incluye estrés, depresión y problemas emocionales, ¿cuántos días, en los últimos 30 días, no tuvo una buena salud mental?
- \_\_\_\_\_ ((cantidad de días))
- 
4. En los últimos 30 días, ¿aproximadamente cuántos días su mala salud física o mental le impidió realizar sus actividades normales, como cuidar de sí mismo, trabajar o actividades recreativas?
- \_\_\_\_\_ ((cantidad de días))
- 
5. ¿Hubo algún momento en los últimos 12 meses que necesitó recibir atención médica (por ejemplo, ver a un médico), pero no pudo hacerlo debido al costo?
- Sí  
 No  
 No sabe
- 
6. ¿Usted o alguien en su vivienda tienen una condición de salud grave como presión arterial alta, enfermedad cardíaca, enfermedad pulmonar, cáncer o diabetes? (marque todas las que correspondan)
- Sí, yo  
 Sí, alguien en mi vivienda  
 No, nadie  
 No sabe
- 
7. ¿Cuál de las siguientes opciones aplican a usted (marque todas las que correspondan)?
- Actualmente estoy embarazada  
 Mi pareja actualmente está embarazada  
 Ni mi pareja ni yo estamos actualmente embarazados
- 
8. ¿Le gustaría quedar embarazada o tener un hijo en el próximo año?
- Sí  
 No  
 No sabe

Confidential

Page 35

**Sección 9: Redes sociales****1. ¿Cuáles de las siguientes redes sociales usa? (Marque la mejor respuesta para cada una)**

|              | La uso todos los días | Algunas veces por semana | Algunas veces por mes | La uso muy poco       | No la uso nunca       |
|--------------|-----------------------|--------------------------|-----------------------|-----------------------|-----------------------|
| a. Facebook  | <input type="radio"/> | <input type="radio"/>    | <input type="radio"/> | <input type="radio"/> | <input type="radio"/> |
| b. Twitter   | <input type="radio"/> | <input type="radio"/>    | <input type="radio"/> | <input type="radio"/> | <input type="radio"/> |
| c. LinkedIn  | <input type="radio"/> | <input type="radio"/>    | <input type="radio"/> | <input type="radio"/> | <input type="radio"/> |
| d. Instagram | <input type="radio"/> | <input type="radio"/>    | <input type="radio"/> | <input type="radio"/> | <input type="radio"/> |
| e. WhatsApp  | <input type="radio"/> | <input type="radio"/>    | <input type="radio"/> | <input type="radio"/> | <input type="radio"/> |
| f. Snapchat  | <input type="radio"/> | <input type="radio"/>    | <input type="radio"/> | <input type="radio"/> | <input type="radio"/> |
| g. Reddit    | <input type="radio"/> | <input type="radio"/>    | <input type="radio"/> | <input type="radio"/> | <input type="radio"/> |

2. ¿Cómo ha cambiado su uso de redes sociales desde que comenzó la pandemia por coronavirus?

- Uso las redes sociales mucho más  
 Uso las redes sociales un poco más  
 No uso las redes sociales más que antes  
 No sabe

2b. Por favor, explique cómo ha cambiado su uso de redes sociales desde que comenzó la pandemia por coronavirus:

---

Confidential

Page 36

**Sección 10: Preguntas demográficas**

1. ¿Cuál es su edad actual, en años?

---

2. ¿Cómo describiría su trasfondo étnico?

---

4. ¿Se considera alguno de los siguientes? (marque todas las que correspondan) Mexicano Puertorriqueño Cubano

- Mexicano  
 Puertorriqueño  
 Cubano

4a. Si se considera parte de otra etnia hispana/latina que no mencionamos arriba, por favor describa:

---

4b. No me considero hispano o latino

- Verdadero  
 Falso

5. ¿Cuál de las siguientes opciones mejor describe su educación?

- No completó la secundaria  
 Completó la educación secundaria o el GED  
 Fue a la universidad pero no la completó  
 Se recibió de la universidad  
 Título de postgrado (MA, PhD, MD, etc.)

Confidential

Page 37

**6. ¿Cuál es su religión actual, si es religioso? Marque todas las que correspondan**

|                           | Sí                    | No                    | Prefiero no contestar |
|---------------------------|-----------------------|-----------------------|-----------------------|
| a. Cristiano              | <input type="radio"/> | <input type="radio"/> | <input type="radio"/> |
| b. Judío (judaísmo)       | <input type="radio"/> | <input type="radio"/> | <input type="radio"/> |
| c. Musulmán               | <input type="radio"/> | <input type="radio"/> | <input type="radio"/> |
| d. Budista                | <input type="radio"/> | <input type="radio"/> | <input type="radio"/> |
| e. Hindú                  | <input type="radio"/> | <input type="radio"/> | <input type="radio"/> |
| f. Ateo (no cree en Dios) | <input type="radio"/> | <input type="radio"/> | <input type="radio"/> |
| g. Otro                   | <input type="radio"/> | <input type="radio"/> | <input type="radio"/> |
| h. No sabe                | <input type="radio"/> | <input type="radio"/> | <input type="radio"/> |

6g. Otra religión, especifique

7. Si vive en Estados Unidos, identifique su raza/etnia (marque todas las que correspondan)

- Nativo americano o nativo de Alaska  
 Asiático  
 Negro o afroamericano  
 Nativo de Hawái  
 Nativo de las Islas del Pacífico  
 Caucásico  
 Otro

7. Seleccionó "otro", por favor especifique qué otra raza/etnia

7. ¿Como cuál de las siguientes categorías se identifica?

- Oyente/no sordo  
 Con problemas de audición  
 sordo  
 Sordo  
 Sordociego

A los fines de este estudio, por favor utilice las siguientes definiciones.

Oyente/no sordo: Persona que no tiene pérdida de la audición;

Con problemas de audición: Persona que tiene una pérdida parcial

de la audición;

sordo: Persona que tiene pérdida de la audición;

Sordo: Persona que tiene pérdida de la audición y se identifica con

la cultura de los Sordos;

Sordociego: Persona con una combinación de pérdida de audición y con visión limitada o sin visión.

9. ¿Cuál de las siguientes opciones mejor describe su género?

- Masculino  
 Femenino  
 Otra opción

Confidential

Page 38

---

q9. Eligió "otra opción" para describir su género, por favor explique:

---

10. Se considera... (marque todas las que correspondan):

- Heterosexual
- Gay
- Lesbiana
- Bisexual
- Transgénero
- No figura en la lista

---

10a. No figura en la lista, indíquelo

---

*Confidential*

Page 39

**Sección 11: Pregunta final**

1. Por favor, comparta cualquier pensamiento adicional sobre el coronavirus y COVID-19 que tenga:

---

Confidential

Page 40

**Sección 12: Calidad de la encuesta**

**Ahora nos gustaría hacerle algunas preguntas sobre esta encuesta para mejorarla en el futuro. Si tiene alguna pregunta específica que le gustaría señalar, por favor, copie y pegue la pregunta en el campo de texto.**

1. En general, las preguntas en esta encuesta fueron "entendibles". Es decir, no tuvo que leer la pregunta más de una vez para entender qué se preguntaba.

- Muy en desacuerdo  
 En desacuerdo  
 Ni de acuerdo ni en desacuerdo  
 De acuerdo  
 Muy de acuerdo

2. ¿Hubo alguna pregunta específica que le resultó particularmente difícil de entender? Si la respuesta es sí, por favor especifique (lo mejor que pueda)

\_\_\_\_\_

3. En general, el significado de las preguntas fue claro y directo

- Muy en desacuerdo  
 En desacuerdo  
 Ni de acuerdo ni en desacuerdo  
 De acuerdo  
 Muy de acuerdo

4. ¿Hubo alguna pregunta específica cuyo significado no fue claro? Si la respuesta es sí, por favor especifique (lo mejor que pueda)

- Sí  No

4a. Si la respuesta es sí, por favor especifique (lo mejor que pueda)

\_\_\_\_\_

5. Las escalas para responder las preguntas fueron apropiadas. Es decir, ¿siente que la escala le proporcionó una manera adecuada para responder?

- Muy en desacuerdo  
 En desacuerdo  
 Ni de acuerdo ni en desacuerdo  
 De acuerdo  
 Muy de acuerdo

6. En su opinión, ¿alguna de las preguntas estaba escrita de tal manera que había SOLO una respuesta OBVIA para usted?

- Sí  
 No

6b. Por favor, explique:

\_\_\_\_\_

¿Algún otro comentario que desee hacer acerca de este estudio?

\_\_\_\_\_

Para más información sobre coronavirus y COVID-19, visite

<https://www.cdc.gov/coronavirus/2019-ncov/index.html>

<https://www.cdc.gov/>

<https://www.who.int/>
